# Supplementary material
Source: publisher figshare collection journal article supplement (https://sage.figshare.com/ndownloader/files/13262195)
Supplement: Supplementary file 1 [file 13262195]

## Sheet: Suppl Table 3A all4groups META
GroupID	Category	Term	Description	LogP	Log(q-value)	InTerm_InList	Genes	Symbols
1_Summary	Hallmark Gene Sets	M5925	HALLMARK E2F TARGETS	-100	-95.749	145/200	332,580,672,675,701,983,991,993,1029,1031,1033,1062,1163,1164,1434,1503,1633,1786,1965,2146,2935,3014,3015,3070,3148,3149,3159,3161,3184,3609,3835,3925,3978,4001,4085,4171,4172,4173,4174,4175,4176,4288,4361,4436,4605,4609,4678,4830,5036,5111,5347,5411,5424,5426,5558,5591,5631,5885,5901,5902,5931,5983,6117,6119,6241,6426,6427,6434,6470,6628,6749,6790,6839,7083,7112,7153,7283,7374,7398,7884,7913,82…	BIRC5,BARD1,BRCA1,BRCA2,BUB1B,CDK1,CDC20,CDC25A,CDKN2A,CDKN2C,CDKN3,CENPE,CKS1B,CKS2,CSE1L,CTPS1,DCK,DNMT1,EIF2S1,EZH2,GSPT1,H2AFX,H2AFZ,HELLS,HMGB2,HMGB3,HMGA1,HMMR,HNRNPD,ILF3,KIF22,STMN1,LIG1,LMNB1,MAD2L1,MCM2,MCM3,MCM4,MCM5,MCM6,MCM7,MKI67,MRE11,MSH2,MYBL2,MYC,NASP,NME1,PA2G4,PCNA,PLK1,PNN,POLD1,POLE,PRIM2,PRKDC,PRPS1,RAD21,RAN,RANBP1,RBBP7,RFC3,RPA1,RPA3,RRM2,SRSF1,SRSF2,TRA2B,SHMT1,SNRPB,SS…
1_Member	Hallmark Gene Sets	M5925	HALLMARK E2F TARGETS	-100	-95.749	145/200	332,580,672,675,701,983,991,993,1029,1031,1033,1062,1163,1164,1434,1503,1633,1786,1965,2146,2935,3014,3015,3070,3148,3149,3159,3161,3184,3609,3835,3925,3978,4001,4085,4171,4172,4173,4174,4175,4176,4288,4361,4436,4605,4609,4678,4830,5036,5111,5347,5411,5424,5426,5558,5591,5631,5885,5901,5902,5931,5983,6117,6119,6241,6426,6427,6434,6470,6628,6749,6790,6839,7083,7112,7153,7283,7374,7398,7884,7913,82…	BIRC5,BARD1,BRCA1,BRCA2,BUB1B,CDK1,CDC20,CDC25A,CDKN2A,CDKN2C,CDKN3,CENPE,CKS1B,CKS2,CSE1L,CTPS1,DCK,DNMT1,EIF2S1,EZH2,GSPT1,H2AFX,H2AFZ,HELLS,HMGB2,HMGB3,HMGA1,HMMR,HNRNPD,ILF3,KIF22,STMN1,LIG1,LMNB1,MAD2L1,MCM2,MCM3,MCM4,MCM5,MCM6,MCM7,MKI67,MRE11,MSH2,MYBL2,MYC,NASP,NME1,PA2G4,PCNA,PLK1,PNN,POLD1,POLE,PRIM2,PRKDC,PRPS1,RAD21,RAN,RANBP1,RBBP7,RFC3,RPA1,RPA3,RRM2,SRSF1,SRSF2,TRA2B,SHMT1,SNRPB,SS…
1_Member	Hallmark Gene Sets	M5901	HALLMARK G2M CHECKPOINT	-91.2969	-87.824	122/200	5347,10733,1950,11004,22974,10212,9700,5558,4609,51776,1031,675,81539,580,1063,1062,1058,10492,94239,6632,595,3799,3014,10293,9493,3835,899,10926,10024,26271,8243,3925,3151,8140,6541,3015,6491,6426,6427,9156,4212,4211,7272,23594,10951,7153,3161,3619,2935,699,9184,993,7371,55872,51659,4678,4001,9252,11065,991,1841,27338,7468,7027,10721,23649,10051,56992,5426,3832,10403,990,8317,51203,29127,10592,1…	PLK1,PLK4,EGF,KIF2C,TPX2,DDX39A,ESPL1,PRIM2,MYC,MAP3K20,CDKN2C,BRCA2,SLC38A1,BARD1,CENPF,CENPE,CENPA,SYNCRIP,H2AFV,SNRPD1,CCND1,KIF5B,H2AFX,TRAIP,KIF23,KIF22,CCNF,DBF4,TROAP,FBXO5,SMC1A,STMN1,HMGN2,SLC7A5,SLC7A1,H2AFZ,STIL,SRSF1,SRSF2,EXO1,MEIS2,MEIS1,TTK,ORC6,CBX1,TOP2A,HMMR,INCENP,GSPT1,BUB1,BUB3,CDC25A,UCK2,PBK,GINS2,NASP,LMNB1,RPS6KA5,UBE2C,CDC20,DTYMK,UBE2S,NSD2,TFDP1,POLQ,POLA2,SMC4,KIF15,P…
2_Summary	Reactome Gene Sets	R-HSA-1640170	Cell Cycle	-100	-96.351	229/635	84790,3306,23354,701,5347,91687,83540,10733,9088,10000,23224,11004,220134,22974,54801,84126,25906,5699,55706,5557,3978,5558,4609,672,1031,79019,1029,7443,11339,2491,580,1063,1062,9688,1058,387103,79682,80152,55166,401541,94239,5932,84142,286826,595,10383,151648,51512,3014,3015,5577,10926,55722,23397,64151,84131,23165,147841,4927,8243,54892,81929,63967,11130,79902,2237,9493,84930,79003,151246,9700…	TUBA1C,HSPA2,HAUS5,BUB1B,PLK1,CENPL,NUF2,PLK4,PKMYT1,AKT3,SYNE2,KIF2C,SKA1,TPX2,HAUS6,ATRIP,ANAPC15,PSMB10,NDC1,PRIM1,LIG1,PRIM2,MYC,BRCA1,CDKN2C,CENPM,CDKN2A,VRK1,OIP5,CENPI,BARD1,CENPF,CENPE,NUP93,CENPA,CENPW,CENPU,CENPT,CENPQ,CENPP,H2AFV,RBBP8,FAM175A,LIN9,CCND1,TUBB4B,SGO1,GTSE1,H2AFX,H2AFZ,PRKAR2B,DBF4,CEP72,NCAPH,NCAPG,CEP78,NUP205,SPC24,NUP88,SMC1A,NCAPG2,SEH1L,CLSPN,ZWINT,NUP85,FEN1,KIF23…
2_Member	Reactome Gene Sets	R-HSA-1640170	Cell Cycle	-100	-96.351	229/635	84790,3306,23354,701,5347,91687,83540,10733,9088,10000,23224,11004,220134,22974,54801,84126,25906,5699,55706,5557,3978,5558,4609,672,1031,79019,1029,7443,11339,2491,580,1063,1062,9688,1058,387103,79682,80152,55166,401541,94239,5932,84142,286826,595,10383,151648,51512,3014,3015,5577,10926,55722,23397,64151,84131,23165,147841,4927,8243,54892,81929,63967,11130,79902,2237,9493,84930,79003,151246,9700…	TUBA1C,HSPA2,HAUS5,BUB1B,PLK1,CENPL,NUF2,PLK4,PKMYT1,AKT3,SYNE2,KIF2C,SKA1,TPX2,HAUS6,ATRIP,ANAPC15,PSMB10,NDC1,PRIM1,LIG1,PRIM2,MYC,BRCA1,CDKN2C,CENPM,CDKN2A,VRK1,OIP5,CENPI,BARD1,CENPF,CENPE,NUP93,CENPA,CENPW,CENPU,CENPT,CENPQ,CENPP,H2AFV,RBBP8,FAM175A,LIN9,CCND1,TUBB4B,SGO1,GTSE1,H2AFX,H2AFZ,PRKAR2B,DBF4,CEP72,NCAPH,NCAPG,CEP78,NUP205,SPC24,NUP88,SMC1A,NCAPG2,SEH1L,CLSPN,ZWINT,NUP85,FEN1,KIF23…
2_Member	GO Biological Processes	GO:1903047	mitotic cell cycle process	-100	-96.351	275/901	220064,27085,701,5347,55142,10769,10733,9088,858,1950,11004,55159,23511,22974,54801,81610,25886,5901,5699,9181,55706,57562,5557,3978,5558,1906,4609,64859,1031,1029,7443,11339,1032,83540,1063,1062,10615,9688,10636,1058,146956,387103,201161,80152,57695,84722,5932,65123,595,10383,151648,51512,5569,9493,3835,899,5577,10926,79892,8089,23397,64151,55022,84131,147841,23165,26271,4927,5111,54892,3925,819…	ORAOV1,MTBP,BUB1B,PLK1,HAUS2,PLK2,PLK4,PKMYT1,CAV2,EGF,KIF2C,RFWD3,NUP188,TPX2,HAUS6,FAM83D,POC1A,RAN,PSMB10,ARHGEF2,NDC1,CEP126,PRIM1,LIG1,PRIM2,EDN1,MYC,NABP1,CDKN2C,CDKN2A,VRK1,OIP5,CDKN2D,NUF2,CENPF,CENPE,SPAG5,NUP93,RGS14,CENPA,EME1,CENPW,CENPV,CENPT,USP37,PSRC1,RBBP8,INTS3,CCND1,TUBB4B,SGO1,GTSE1,PKIA,KIF23,KIF22,CCNF,PRKAR2B,DBF4,MCMBP,YEATS4,NCAPH,NCAPG,PID1,CEP78,SPC24,NUP205,FBXO5,NUP88…
2_Member	GO Biological Processes	GO:0000278	mitotic cell cycle	-100	-96.351	290/992	220064,27085,701,5347,55142,10769,10733,9088,858,1950,11004,55159,23511,22974,54801,81610,25886,5901,5699,9181,55706,57562,5557,3978,5558,1906,4609,64859,1031,1029,7443,11339,1032,83540,1063,1062,10615,9688,10636,1058,146956,387103,201161,80152,57695,84722,5932,65123,595,10383,151648,51512,5569,9493,3835,899,5577,10926,79892,8089,23397,64151,55022,84131,5058,23165,26271,4927,5111,54892,3925,81929…	ORAOV1,MTBP,BUB1B,PLK1,HAUS2,PLK2,PLK4,PKMYT1,CAV2,EGF,KIF2C,RFWD3,NUP188,TPX2,HAUS6,FAM83D,POC1A,RAN,PSMB10,ARHGEF2,NDC1,CEP126,PRIM1,LIG1,PRIM2,EDN1,MYC,NABP1,CDKN2C,CDKN2A,VRK1,OIP5,CDKN2D,NUF2,CENPF,CENPE,SPAG5,NUP93,RGS14,CENPA,EME1,CENPW,CENPV,CENPT,USP37,PSRC1,RBBP8,INTS3,CCND1,TUBB4B,SGO1,GTSE1,PKIA,KIF23,KIF22,CCNF,PRKAR2B,DBF4,MCMBP,YEATS4,NCAPH,NCAPG,PID1,CEP78,PAK1,NUP205,FBXO5,NUP88,…
2_Member	Reactome Gene Sets	R-HSA-69278	Cell Cycle, Mitotic	-95.2338	-91.682	185/528	332,595,699,701,890,891,983,990,991,993,995,1017,1021,1029,1031,1032,1058,1062,1063,1163,1719,1763,1778,1869,1870,2237,2305,2491,3014,3015,3161,3320,3619,3978,4000,4001,4085,4171,4172,4173,4174,4175,4176,4331,4605,4751,4927,4998,5111,5116,5347,5422,5424,5426,5427,5501,5557,5558,5700,5702,5705,5708,5717,5885,5933,5983,5984,5985,6117,6119,6241,6418,6790,7027,7112,7153,7283,7298,7443,8243,8317,8318,…	BIRC5,CCND1,BUB1,BUB1B,CCNA2,CCNB1,CDK1,CDC6,CDC20,CDC25A,CDC25C,CDK2,CDK6,CDKN2A,CDKN2C,CDKN2D,CENPA,CENPE,CENPF,CKS1B,DHFR,DNA2,DYNC1H1,E2F1,E2F2,FEN1,FOXM1,CENPI,H2AFX,H2AFZ,HMMR,HSP90AA1,INCENP,LIG1,LMNA,LMNB1,MAD2L1,MCM2,MCM3,MCM4,MCM5,MCM6,MCM7,MNAT1,MYBL2,NEK2,NUP88,ORC1,PCNA,PCNT,PLK1,POLA1,POLD1,POLE,POLE2,PPP1CC,PRIM1,PRIM2,PSMC1,PSMC3,PSMC5,PSMD2,PSMD11,RAD21,RBL1,RFC3,RFC4,RFC5,RPA1,R…
2_Member	GO Biological Processes	GO:0007059	chromosome segregation	-64.5353	-61.284	122/334	292,332,672,699,701,891,990,991,1058,1062,1063,1104,1663,1894,2177,2237,2491,2669,3619,3832,3835,3837,4085,4288,4361,4751,5347,5501,5885,7153,7272,7517,8243,9055,9126,9134,9184,9212,9232,9319,9493,9700,9735,9787,9793,9918,9928,10051,10096,10097,10403,10460,10592,10615,11004,11065,11130,11339,23212,23310,23397,23421,24137,25906,28989,29127,51203,54069,54821,54908,54984,55055,55143,55165,55166,5535…	SLC25A5,BIRC5,BRCA1,BUB1,BUB1B,CCNB1,CDC6,CDC20,CENPA,CENPE,CENPF,RCC1,DDX11,ECT2,FANCD2,FEN1,CENPI,GEM,INCENP,KIF11,KIF22,KPNB1,MAD2L1,MKI67,MRE11,NEK2,PLK1,PPP1CC,RAD21,TOP2A,TTK,XRCC3,SMC1A,PRC1,SMC3,CCNE2,BUB3,AURKB,PTTG1,TRIP13,KIF23,ESPL1,KNTC1,DLGAP5,CKAP5,NCAPD2,KIF14,SMC4,ACTR3,ACTR2,NDC80,TACC3,SMC2,SPAG5,KIF2C,UBE2C,ZWINT,OIP5,RRS1,NCAPD3,NCAPH,ITGB3BP,KIF4A,ANAPC15,NTMT1,RACGAP1,NUSAP…
2_Member	GO Biological Processes	GO:0051301	cell division	-60.6519	-57.48	171/559	701,5347,55142,8502,201161,11004,220134,22974,805,5901,9181,9700,3978,4609,55752,675,7443,11339,83540,1063,1062,10615,1058,387103,10755,80152,57695,84722,5932,595,151246,151648,9493,3815,899,79892,23397,64151,4904,57405,26271,54892,3925,81929,11130,56776,85444,79003,23157,1731,140609,4751,93323,9134,10376,54930,23354,8914,79866,7153,8243,3619,699,1021,9184,995,117583,993,9918,23310,641,7424,55055…	BUB1B,PLK1,HAUS2,PKP4,CENPV,KIF2C,SKA1,TPX2,CALM2,RAN,ARHGEF2,ESPL1,LIG1,MYC,SEPT11,BRCA2,VRK1,OIP5,NUF2,CENPF,CENPE,SPAG5,CENPA,CENPW,GIPC1,CENPT,USP37,PSRC1,RBBP8,CCND1,SGO2,SGO1,KIF23,KIT,CCNF,MCMBP,NCAPH,NCAPG,YBX1,SPC25,FBXO5,NCAPG2,STMN1,SEH1L,ZWINT,FMN2,LRRCC1,MIS12,SEPT6,SEPT1,NEK7,NEK2,HAUS8,CCNE2,TUBA1B,HAUS4,HAUS5,TIMELESS,BORA,TOP2A,SMC1A,INCENP,BUB1,CDK6,BUB3,CDC25C,PARD3B,CDC25A,NCA…
2_Member	GO Biological Processes	GO:0098813	nuclear chromosome segregation	-58.0462	-54.909	108/290	332,699,701,891,990,991,1058,1062,1063,1663,1894,2177,2237,2491,2669,3619,3835,3837,4085,4361,4751,5347,5501,5885,7153,7272,7517,8243,9055,9126,9134,9184,9212,9232,9319,9493,9700,9735,9787,9793,9918,9928,10051,10096,10097,10403,10460,10592,10615,11004,11065,11130,23212,23310,23397,23421,24137,25906,29127,51203,54821,54908,54984,55055,55143,55165,55166,55706,55839,56776,57082,57122,57405,57697,641…	BIRC5,BUB1,BUB1B,CCNB1,CDC6,CDC20,CENPA,CENPE,CENPF,DDX11,ECT2,FANCD2,FEN1,CENPI,GEM,INCENP,KIF22,KPNB1,MAD2L1,MRE11,NEK2,PLK1,PPP1CC,RAD21,TOP2A,TTK,XRCC3,SMC1A,PRC1,SMC3,CCNE2,BUB3,AURKB,PTTG1,TRIP13,KIF23,ESPL1,KNTC1,DLGAP5,CKAP5,NCAPD2,KIF14,SMC4,ACTR3,ACTR2,NDC80,TACC3,SMC2,SPAG5,KIF2C,UBE2C,ZWINT,RRS1,NCAPD3,NCAPH,ITGB3BP,KIF4A,ANAPC15,RACGAP1,NUSAP1,ERCC6L,SPDL1,PINX1,ZWILCH,CDCA8,CEP55,CE…
2_Member	GO Biological Processes	GO:0044772	mitotic cell cycle phase transition	-49.4245	-46.378	143/506	220064,27085,701,5347,10769,10733,9088,79866,22974,25906,9700,9787,4609,1031,1029,55835,1032,1063,1062,586,57695,5932,595,10383,51512,5569,10926,55722,55022,84131,5111,63967,84930,7517,79858,4751,93323,9134,54930,23354,55142,7272,57060,3161,2935,699,90381,995,4361,993,641,79915,11065,5717,203068,9833,1978,5427,27338,7027,5116,55159,5699,81620,5591,9928,5426,5577,2305,26271,80174,10403,10763,990,8…	ORAOV1,MTBP,BUB1B,PLK1,PLK2,PLK4,PKMYT1,BORA,TPX2,ANAPC15,ESPL1,DLGAP5,MYC,CDKN2C,CDKN2A,CENPJ,CDKN2D,CENPF,CENPE,BCAT1,USP37,RBBP8,CCND1,TUBB4B,GTSE1,PKIA,DBF4,CEP72,PID1,CEP78,PCNA,CLSPN,MASTL,XRCC3,NEK11,NEK2,HAUS8,CCNE2,HAUS4,HAUS5,HAUS2,TTK,PCBP4,HMMR,GSPT1,BUB1,TICRR,CDC25C,MRE11,CDC25A,BLM,ATAD5,UBE2C,PSMD11,TUBB,MELK,EIF4EBP1,POLE2,UBE2S,TFDP1,PCNT,RFWD3,PSMB10,CDT1,PRKDC,KIF14,POLE,PRKAR…
2_Member	GO Biological Processes	GO:0044770	cell cycle phase transition	-48.9708	-45.95	147/533	220064,27085,701,5347,55142,10769,10733,9088,79866,22974,25906,9700,9787,4609,1031,1029,55835,1032,1063,1062,586,493,57695,5932,595,10383,51512,5569,10926,55722,55022,84131,5111,63967,84930,7517,79858,4751,93323,9134,54930,23354,8914,7272,57060,3161,2935,699,90381,995,4361,993,641,79915,11065,5717,203068,9833,1978,5427,27338,7027,5116,55159,5699,81620,5591,9928,5426,5577,2305,26271,80174,10403,10…	ORAOV1,MTBP,BUB1B,PLK1,HAUS2,PLK2,PLK4,PKMYT1,BORA,TPX2,ANAPC15,ESPL1,DLGAP5,MYC,CDKN2C,CDKN2A,CENPJ,CDKN2D,CENPF,CENPE,BCAT1,ATP2B4,USP37,RBBP8,CCND1,TUBB4B,GTSE1,PKIA,DBF4,CEP72,PID1,CEP78,PCNA,CLSPN,MASTL,XRCC3,NEK11,NEK2,HAUS8,CCNE2,HAUS4,HAUS5,TIMELESS,TTK,PCBP4,HMMR,GSPT1,BUB1,TICRR,CDC25C,MRE11,CDC25A,BLM,ATAD5,UBE2C,PSMD11,TUBB,MELK,EIF4EBP1,POLE2,UBE2S,TFDP1,PCNT,RFWD3,PSMB10,CDT1,PRKDC,…
2_Member	GO Biological Processes	GO:0051726	regulation of cell cycle	-42.1453	-39.195	212/993	7051,220064,27085,701,5347,10769,10733,9088,2852,8502,201161,858,1950,79866,22974,805,25886,25906,5699,493,9700,9787,1906,4609,51776,64859,672,1031,1029,55835,1032,580,57646,1063,1062,10615,6737,4487,10755,5036,388610,84722,5932,65123,286826,595,51512,3014,5569,9493,899,55771,55022,146956,26271,5111,51514,11130,3265,80174,8850,23087,2237,84930,5565,7517,79598,90381,140609,6491,4751,6777,9134,8414…	TGM1,ORAOV1,MTBP,BUB1B,PLK1,PLK2,PLK4,PKMYT1,GPER1,PKP4,CENPV,CAV2,EGF,BORA,TPX2,CALM2,POC1A,ANAPC15,PSMB10,ATP2B4,ESPL1,DLGAP5,EDN1,MYC,MAP3K20,NABP1,BRCA1,CDKN2C,CDKN2A,CENPJ,CDKN2D,BARD1,USP28,CENPF,CENPE,SPAG5,TRIM21,MSX1,GIPC1,PA2G4,TRNP1,PSRC1,RBBP8,INTS3,LIN9,CCND1,GTSE1,H2AFX,PKIA,KIF23,CCNF,PRR11,PID1,EME1,FBXO5,PCNA,DTL,ZWINT,HRAS,DBF4B,KAT2B,TRIM35,FEN1,MASTL,PRKAB2,XRCC3,CEP97,TICRR,N…
2_Member	GO Biological Processes	GO:0000070	mitotic sister chromatid segregation	-33.1256	-30.38	56/135	699,701,891,990,991,1062,1063,3835,3837,4085,4751,5347,7272,7517,8243,9055,9126,9184,9212,9493,9700,9787,9918,9928,10051,10403,10460,10592,10615,11004,11065,11130,23212,23310,23397,24137,25906,29127,51203,54908,54984,55143,55165,64151,79003,79075,81620,81929,81930,83903,84250,84722,90417,113130,146909,348654	BUB1,BUB1B,CCNB1,CDC6,CDC20,CENPE,CENPF,KIF22,KPNB1,MAD2L1,NEK2,PLK1,TTK,XRCC3,SMC1A,PRC1,SMC3,BUB3,AURKB,KIF23,ESPL1,DLGAP5,NCAPD2,KIF14,SMC4,NDC80,TACC3,SMC2,SPAG5,KIF2C,UBE2C,ZWINT,RRS1,NCAPD3,NCAPH,KIF4A,ANAPC15,RACGAP1,NUSAP1,SPDL1,PINX1,CDCA8,CEP55,NCAPG,MIS12,DSCC1,CDT1,SEH1L,KIF18A,GSG2,SLF1,PSRC1,KNSTRN,CDCA5,KIF18B,GEN1
3_Summary	GO Biological Processes	GO:0006259	DNA metabolic process	-62.7795	-59.57	241/977	220064,84083,55270,2852,79077,57646,54815,1950,55159,7919,84126,5901,55704,1786,5557,3978,5558,4609,64859,672,675,201973,1032,580,1063,4796,5468,11177,5980,4254,55775,57695,5932,65123,4830,286826,90381,3014,3835,5763,64710,55022,409,4913,54433,146956,3575,9401,7884,84057,3150,51514,8533,3265,9134,9246,92675,7913,2237,81931,7517,7516,118460,56915,140609,63979,4751,9557,10856,4841,84142,9156,8914,6…	ORAOV1,ZRANB3,NUDT15,GPER1,DCTPP1,USP28,GATAD2A,EGF,RFWD3,DDX39B,ATRIP,RAN,CCDC88A,DNMT1,PRIM1,LIG1,PRIM2,MYC,NABP1,BRCA1,BRCA2,PRIMPOL,CDKN2D,BARD1,CENPF,TONSL,PPARG,BAZ1A,REV3L,KITLG,TDP1,USP37,RBBP8,INTS3,NME1,LIN9,TICRR,H2AFX,KIF22,PTMS,NUCKS1,PID1,ARRB2,NTHL1,GAR1,EME1,IL7R,RECQL4,SLBP,MND1,HMGN1,DTL,COPS3,HRAS,CCNE2,UBE2L6,DTD1,DEK,FEN1,ZNF93,XRCC3,XRCC2,EXOSC6,EXOSC5,NEK7,FIGNL1,NEK2,CHD1L…
3_Member	GO Biological Processes	GO:0006259	DNA metabolic process	-62.7795	-59.57	241/977	220064,84083,55270,2852,79077,57646,54815,1950,55159,7919,84126,5901,55704,1786,5557,3978,5558,4609,64859,672,675,201973,1032,580,1063,4796,5468,11177,5980,4254,55775,57695,5932,65123,4830,286826,90381,3014,3835,5763,64710,55022,409,4913,54433,146956,3575,9401,7884,84057,3150,51514,8533,3265,9134,9246,92675,7913,2237,81931,7517,7516,118460,56915,140609,63979,4751,9557,10856,4841,84142,9156,8914,6…	ORAOV1,ZRANB3,NUDT15,GPER1,DCTPP1,USP28,GATAD2A,EGF,RFWD3,DDX39B,ATRIP,RAN,CCDC88A,DNMT1,PRIM1,LIG1,PRIM2,MYC,NABP1,BRCA1,BRCA2,PRIMPOL,CDKN2D,BARD1,CENPF,TONSL,PPARG,BAZ1A,REV3L,KITLG,TDP1,USP37,RBBP8,INTS3,NME1,LIN9,TICRR,H2AFX,KIF22,PTMS,NUCKS1,PID1,ARRB2,NTHL1,GAR1,EME1,IL7R,RECQL4,SLBP,MND1,HMGN1,DTL,COPS3,HRAS,CCNE2,UBE2L6,DTD1,DEK,FEN1,ZNF93,XRCC3,XRCC2,EXOSC6,EXOSC5,NEK7,FIGNL1,NEK2,CHD1L…
3_Member	GO Biological Processes	GO:0006260	DNA replication	-54.5056	-51.431	117/293	84083,1950,84126,55704,5557,3978,5558,672,675,580,4796,11177,5980,4254,57695,5932,5931,10926,64710,55022,146956,9401,7884,51514,3265,92675,56034,2237,90381,54465,9134,9156,8914,23594,4771,5763,29980,8243,94,79892,995,4361,993,10189,10038,253714,641,51659,64785,4678,9837,10535,84296,23560,27000,5427,63901,10721,5985,5984,5983,5426,80174,51053,83990,990,8317,6418,9126,63967,81620,5424,10714,57697,3…	ZRANB3,EGF,ATRIP,CCDC88A,PRIM1,LIG1,PRIM2,BRCA1,BRCA2,BARD1,TONSL,BAZ1A,REV3L,KITLG,USP37,RBBP8,RBBP7,DBF4,NUCKS1,PID1,EME1,RECQL4,SLBP,DTL,HRAS,DTD1,PDGFC,FEN1,TICRR,ETAA1,CCNE2,EXO1,TIMELESS,ORC6,NF2,PTMS,DONSON,SMC1A,ACVRL1,MCMBP,CDC25C,MRE11,CDC25A,ALYREF,PARP2,MMS22L,BLM,GINS2,GINS3,NASP,GINS1,RNASEH2A,GINS4,GTPBP4,DNAJC2,POLE2,FAM111A,POLQ,RFC5,RFC4,RFC3,POLE,DBF4B,GMNN,BRIP1,CDC6,CDC7,SET,…
3_Member	GO Biological Processes	GO:0006974	cellular response to DNA damage stimulus	-41.9458	-39.017	184/791	27330,220064,5366,84083,5347,10769,51377,57646,84126,7919,10212,65057,3978,4609,51776,64859,672,675,54541,55835,1032,580,4796,5980,29108,6591,6387,55775,5932,65123,595,51512,3014,3835,64710,4913,146956,9401,84057,3150,51514,8533,56776,9246,7913,2237,7517,7516,79858,90381,63979,9557,10856,4841,84142,9156,8914,11198,57060,5295,4361,7153,8243,83666,4824,995,4521,253714,10038,641,7318,56647,83596,568…	RPS6KA6,ORAOV1,PMAIP1,ZRANB3,PLK1,PLK2,UCHL5,USP28,ATRIP,DDX39B,DDX39A,ACD,LIG1,MYC,MAP3K20,NABP1,BRCA1,BRCA2,DDIT4,CENPJ,CDKN2D,BARD1,TONSL,REV3L,PYCARD,SNAI2,CXCL12,TDP1,RBBP8,INTS3,CCND1,GTSE1,H2AFX,KIF22,NUCKS1,NTHL1,EME1,RECQL4,MND1,HMGN1,DTL,COPS3,FMN2,UBE2L6,DEK,FEN1,XRCC3,XRCC2,NEK11,TICRR,FIGNL1,CHD1L,RUVBL2,NONO,FAM175A,EXO1,TIMELESS,SUPT16H,PCBP4,PIK3R1,MRE11,TOP2A,SMC1A,PARP9,NKX3-1,C…
3_Member	GO Biological Processes	GO:0051052	regulation of DNA metabolic process	-26.8039	-24.243	101/375	84083,2852,7919,55704,1786,4609,672,675,4254,57695,3014,64710,55022,409,3575,9401,3265,7913,7517,118460,140609,4751,55010,10576,84142,8914,1017,4771,7153,8243,94,90381,4361,10189,641,5468,79915,27000,5216,7468,54069,10721,65057,5985,5984,5983,2305,80174,51053,990,8317,6778,9126,81620,10635,7398,3184,4436,7292,55183,3178,8091,63979,63922,7374,60489,200316,983,6950,5888,3320,79075,2067,3146,2956,54…	ZRANB3,GPER1,DDX39B,CCDC88A,DNMT1,MYC,BRCA1,BRCA2,KITLG,USP37,H2AFX,NUCKS1,PID1,ARRB2,IL7R,RECQL4,HRAS,DEK,XRCC3,EXOSC6,NEK7,NEK2,PARPBP,CCT2,FAM175A,TIMELESS,CDK2,NF2,TOP2A,SMC1A,ACVRL1,TICRR,MRE11,ALYREF,BLM,PPARG,ATAD5,DNAJC2,PFN1,NSD2,MIS18A,POLQ,ACD,RFC5,RFC4,RFC3,FOXM1,DBF4B,GMNN,CDC6,CDC7,STAT6,SMC3,CDT1,RAD51AP1,USP1,HNRNPD,MSH2,TNFSF4,RIF1,HNRNPA1,HMGA2,FIGNL1,CHTF18,UNG,APOBEC3G,APOBEC3…
3_Member	GO Biological Processes	GO:0051054	positive regulation of DNA metabolic process	-16.8928	-14.624	60/207	5111,63922,409,65057,5985,2067,3146,2956,3643,2305,80174,27101,118460,8317,140609,1763,4751,1663,10576,84142,1786,8914,6950,328,9314,9212,5984,4609,3184,3265,7153,672,5154,306,56034,55183,6778,4361,3178,5580,5983,55135,7374,3082,7919,4254,5216,144455,7468,79915,3014,79733,983,1017,5888,1736,3320,7292,84250,79075	PCNA,CHTF18,ARRB2,ACD,RFC5,ERCC1,HMGB1,MSH6,INSR,FOXM1,DBF4B,CACYBP,EXOSC6,CDC7,NEK7,DNA2,NEK2,DDX11,CCT2,FAM175A,DNMT1,TIMELESS,TCP1,APEX1,KLF4,AURKB,RFC4,MYC,HNRNPD,HRAS,TOP2A,BRCA1,PDGFA,ANXA3,PDGFC,RIF1,STAT6,MRE11,HNRNPA1,PRKCD,RFC3,WRAP53,UNG,HGF,DDX39B,KITLG,PFN1,E2F7,NSD2,ATAD5,H2AFX,E2F8,CDK1,CDK2,RAD51,DKC1,HSP90AA1,TNFSF4,SLF1,DSCC1
4_Summary	Hallmark Gene Sets	M5930	HALLMARK EPITHELIAL MESENCHYMAL TRANSITION	-37.3107	-34.014	114/200	59,290,388,633,1000,1004,1277,1281,1290,1292,1293,1301,1303,1307,1462,1490,1634,1809,1842,2192,2199,2200,2201,2247,2335,2517,2619,2669,2697,2882,3371,3398,3486,3487,3491,3576,3600,3624,3673,3688,3690,3693,3918,3956,4015,4016,4060,4147,4148,4176,4314,4487,4837,4982,5021,5054,5118,5159,5270,5329,5376,5654,5744,5768,5806,5817,5999,6303,6382,6385,6387,6422,6535,6591,6696,6876,7045,7049,7052,7058,7070…	ACTA2,ANPEP,RHOB,BGN,CDH2,CDH6,COL1A1,COL3A1,COL5A2,COL6A2,COL6A3,COL11A1,COL12A1,COL16A1,VCAN,CTGF,DCN,DPYSL3,ECM2,FBLN1,FBLN2,FBN1,FBN2,FGF2,FN1,FUCA1,GAS1,GEM,GJA1,GPX7,TNC,ID2,IGFBP3,IGFBP4,CYR61,CXCL8,IL15,INHBA,ITGA2,ITGB1,ITGB3,ITGB5,LAMC2,LGALS1,LOX,LOXL1,LUM,MATN2,MATN3,MCM7,MMP3,MSX1,NNMT,TNFRSF11B,OXTR,SERPINE1,PCOLCE,PDGFRB,SERPINE2,PLAUR,PMP22,HTRA1,PTHLH,QSOX1,PTX3,PVR,RGS4,SAT1,SDC…
4_Member	Hallmark Gene Sets	M5930	HALLMARK EPITHELIAL MESENCHYMAL TRANSITION	-37.3107	-34.014	114/200	59,290,388,633,1000,1004,1277,1281,1290,1292,1293,1301,1303,1307,1462,1490,1634,1809,1842,2192,2199,2200,2201,2247,2335,2517,2619,2669,2697,2882,3371,3398,3486,3487,3491,3576,3600,3624,3673,3688,3690,3693,3918,3956,4015,4016,4060,4147,4148,4176,4314,4487,4837,4982,5021,5054,5118,5159,5270,5329,5376,5654,5744,5768,5806,5817,5999,6303,6382,6385,6387,6422,6535,6591,6696,6876,7045,7049,7052,7058,7070…	ACTA2,ANPEP,RHOB,BGN,CDH2,CDH6,COL1A1,COL3A1,COL5A2,COL6A2,COL6A3,COL11A1,COL12A1,COL16A1,VCAN,CTGF,DCN,DPYSL3,ECM2,FBLN1,FBLN2,FBN1,FBN2,FGF2,FN1,FUCA1,GAS1,GEM,GJA1,GPX7,TNC,ID2,IGFBP3,IGFBP4,CYR61,CXCL8,IL15,INHBA,ITGA2,ITGB1,ITGB3,ITGB5,LAMC2,LGALS1,LOX,LOXL1,LUM,MATN2,MATN3,MCM7,MMP3,MSX1,NNMT,TNFRSF11B,OXTR,SERPINE1,PCOLCE,PDGFRB,SERPINE2,PLAUR,PMP22,HTRA1,PTHLH,QSOX1,PTX3,PVR,RGS4,SAT1,SDC…
4_Member	Reactome Gene Sets	R-HSA-1474244	Extracellular matrix organization	-13.7913	-11.562	105/300	2,87,101,633,650,652,726,780,824,1277,1281,1290,1291,1292,1293,1295,1298,1300,1301,1303,1305,1307,1308,1404,1462,1509,1513,1634,1756,2192,2199,2200,2201,2202,2247,2335,3371,3383,3655,3672,3673,3675,3676,3679,3688,3690,3693,3791,3910,3911,3912,3914,3918,4015,4016,4052,4053,4054,4060,4148,4237,4239,4314,4316,4319,4320,4324,4325,4326,4811,5054,5118,5154,5155,5654,5802,6382,6383,6385,6696,7042,7087,7…	A2M,ACTN1,ADAM8,BGN,BMP2,BMP4,CAPN5,DDR1,CAPN2,COL1A1,COL3A1,COL5A2,COL6A1,COL6A2,COL6A3,COL8A1,COL9A2,COL10A1,COL11A1,COL12A1,COL13A1,COL16A1,COL17A1,HAPLN1,VCAN,CTSD,CTSK,DCN,DMD,FBLN1,FBLN2,FBN1,FBN2,EFEMP1,FGF2,FN1,TNC,ICAM1,ITGA6,ITGA1,ITGA2,ITGA3,ITGA4,ITGA7,ITGB1,ITGB3,ITGB5,KDR,LAMA4,LAMA5,LAMB1,LAMB3,LAMC2,LOX,LOXL1,LTBP1,LTBP2,LTBP3,LUM,MATN3,MFAP2,MFAP4,MMP3,MMP7,MMP10,MMP11,MMP15,MMP1…
4_Member	GO Biological Processes	GO:0030198	extracellular matrix organization	-10.9627	-8.947	102/316	2,25,101,302,633,780,824,1277,1281,1290,1291,1292,1293,1295,1298,1300,1301,1303,1305,1307,1404,1462,1471,1490,1513,1634,1803,1842,2113,2192,2200,2201,2247,2335,3037,3371,3383,3491,3655,3672,3673,3675,3676,3679,3688,3690,3693,3791,3910,3911,3912,3914,3918,4015,4016,4060,4148,4237,4239,4241,4314,4316,4319,4320,4324,4325,4811,4982,5054,5154,5155,5654,6696,7042,7045,7046,7087,7373,8076,9507,9509,1021…	A2M,ABL1,ADAM8,ANXA2,BGN,DDR1,CAPN2,COL1A1,COL3A1,COL5A2,COL6A1,COL6A2,COL6A3,COL8A1,COL9A2,COL10A1,COL11A1,COL12A1,COL13A1,COL16A1,HAPLN1,VCAN,CST3,CTGF,CTSK,DCN,DPP4,ECM2,ETS1,FBLN1,FBN1,FBN2,FGF2,FN1,HAS2,TNC,ICAM1,CYR61,ITGA6,ITGA1,ITGA2,ITGA3,ITGA4,ITGA7,ITGB1,ITGB3,ITGB5,KDR,LAMA4,LAMA5,LAMB1,LAMB3,LAMC2,LOX,LOXL1,LUM,MATN3,MFAP2,MFAP4,MELTF,MMP3,MMP7,MMP10,MMP11,MMP15,MMP16,NID1,TNFRSF11B,…
4_Member	GO Biological Processes	GO:0043062	extracellular structure organization	-10.8717	-8.866	102/317	2,25,101,302,633,780,824,1277,1281,1290,1291,1292,1293,1295,1298,1300,1301,1303,1305,1307,1404,1462,1471,1490,1513,1634,1803,1842,2113,2192,2200,2201,2247,2335,3037,3371,3383,3491,3655,3672,3673,3675,3676,3679,3688,3690,3693,3791,3910,3911,3912,3914,3918,4015,4016,4060,4148,4237,4239,4241,4314,4316,4319,4320,4324,4325,4811,4982,5054,5154,5155,5654,6696,7042,7045,7046,7087,7373,8076,9507,9509,1021…	A2M,ABL1,ADAM8,ANXA2,BGN,DDR1,CAPN2,COL1A1,COL3A1,COL5A2,COL6A1,COL6A2,COL6A3,COL8A1,COL9A2,COL10A1,COL11A1,COL12A1,COL13A1,COL16A1,HAPLN1,VCAN,CST3,CTGF,CTSK,DCN,DPP4,ECM2,ETS1,FBLN1,FBN1,FBN2,FGF2,FN1,HAS2,TNC,ICAM1,CYR61,ITGA6,ITGA1,ITGA2,ITGA3,ITGA4,ITGA7,ITGB1,ITGB3,ITGB5,KDR,LAMA4,LAMA5,LAMB1,LAMB3,LAMC2,LOX,LOXL1,LUM,MATN3,MFAP2,MFAP4,MELTF,MMP3,MMP7,MMP10,MMP11,MMP15,MMP16,NID1,TNFRSF11B,…
5_Summary	GO Biological Processes	GO:0007051	spindle organization	-31.7354	-29.029	58/153	329,330,332,387,891,991,1104,1778,3832,3837,3925,4605,4627,4751,5116,5347,5901,5902,6491,6790,7272,7283,7430,8243,9055,9212,9493,9700,9793,10403,10426,10460,10615,10769,22974,23354,24137,25777,25886,26271,28989,29127,29899,54801,55142,55722,57405,79000,79598,79866,84722,90417,93323,140609,203068,259266,284403,440145	BIRC2,BIRC3,BIRC5,RHOA,CCNB1,CDC20,RCC1,DYNC1H1,KIF11,KPNB1,STMN1,MYBL2,MYH9,NEK2,PCNT,PLK1,RAN,RANBP1,STIL,AURKA,TTK,TUBG1,EZR,SMC1A,PRC1,AURKB,KIF23,ESPL1,CKAP5,NDC80,TUBGCP3,TACC3,SPAG5,PLK2,TPX2,HAUS5,KIF4A,SUN2,POC1A,FBXO5,NTMT1,RACGAP1,GPSM2,HAUS6,HAUS2,CEP72,SPC25,AUNIP,CEP97,BORA,PSRC1,KNSTRN,HAUS8,NEK7,TUBB,ASPM,WDR62,MZT1
5_Member	GO Biological Processes	GO:0007051	spindle organization	-31.7354	-29.029	58/153	329,330,332,387,891,991,1104,1778,3832,3837,3925,4605,4627,4751,5116,5347,5901,5902,6491,6790,7272,7283,7430,8243,9055,9212,9493,9700,9793,10403,10426,10460,10615,10769,22974,23354,24137,25777,25886,26271,28989,29127,29899,54801,55142,55722,57405,79000,79598,79866,84722,90417,93323,140609,203068,259266,284403,440145	BIRC2,BIRC3,BIRC5,RHOA,CCNB1,CDC20,RCC1,DYNC1H1,KIF11,KPNB1,STMN1,MYBL2,MYH9,NEK2,PCNT,PLK1,RAN,RANBP1,STIL,AURKA,TTK,TUBG1,EZR,SMC1A,PRC1,AURKB,KIF23,ESPL1,CKAP5,NDC80,TUBGCP3,TACC3,SPAG5,PLK2,TPX2,HAUS5,KIF4A,SUN2,POC1A,FBXO5,NTMT1,RACGAP1,GPSM2,HAUS6,HAUS2,CEP72,SPC25,AUNIP,CEP97,BORA,PSRC1,KNSTRN,HAUS8,NEK7,TUBB,ASPM,WDR62,MZT1
5_Member	GO Biological Processes	GO:0007052	mitotic spindle organization	-22.2519	-19.779	39/99	329,330,332,387,891,991,1104,1778,3832,3837,3925,4605,4751,5116,5347,5901,6491,6790,7272,8243,9055,9212,9493,10403,10426,10460,10769,22974,24137,25777,25886,29127,29899,57405,79598,79866,84722,284403,440145	BIRC2,BIRC3,BIRC5,RHOA,CCNB1,CDC20,RCC1,DYNC1H1,KIF11,KPNB1,STMN1,MYBL2,NEK2,PCNT,PLK1,RAN,STIL,AURKA,TTK,SMC1A,PRC1,AURKB,KIF23,NDC80,TUBGCP3,TACC3,PLK2,TPX2,KIF4A,SUN2,POC1A,RACGAP1,GPSM2,SPC25,CEP97,BORA,PSRC1,WDR62,MZT1
5_Member	GO Biological Processes	GO:0090307	mitotic spindle assembly	-8.00556	-6.446	18/63	329,330,332,387,991,3832,3837,4605,4751,5347,9212,9493,10426,22974,24137,29127,79598,440145	BIRC2,BIRC3,BIRC5,RHOA,CDC20,KIF11,KPNB1,MYBL2,NEK2,PLK1,AURKB,KIF23,TUBGCP3,TPX2,KIF4A,RACGAP1,CEP97,MZT1
6_Summary	GO Biological Processes	GO:0072359	circulatory system development	-30.9559	-27.851	297/921	25,59,70,94,101,133,182,196,283,284,287,290,302,306,347,348,387,388,409,576,577,585,639,650,652,672,677,694,727,790,857,861,891,983,1000,1012,1277,1281,1295,1301,1363,1464,1490,1491,1634,1717,1832,1848,1855,1889,1901,1906,1909,1948,1950,1958,1960,1969,2004,2034,2047,2048,2057,2064,2065,2113,2152,2185,2200,2246,2247,2254,2300,2308,2321,2335,2539,2548,2549,2648,2697,2776,2852,3037,3082,3162,3164,32…	ABL1,ACTA2,ACTC1,ACVRL1,ADAM8,ADM,JAG1,AHR,ANG,ANGPT1,ANK2,ANPEP,ANXA2,ANXA3,APOD,APOE,RHOA,RHOB,ARRB2,ADGRB2,ADGRB3,BBS4,PRDM1,BMP2,BMP4,BRCA1,ZFP36L1,BTG1,C5,CAD,CAV1,RUNX1,CCNB1,CDK1,CDH2,CDH13,COL1A1,COL3A1,COL8A1,COL11A1,CPE,CSPG4,CTGF,CTH,DCN,DHCR7,DSP,DUSP6,DVL1,ECE1,S1PR1,EDN1,EDNRA,EFNB2,EGF,EGR1,EGR3,EPHA2,ELK3,EPAS1,EPHB1,EPHB2,EPOR,ERBB2,ERBB3,ETS1,F3,PTK2B,FBN1,FGF1,FGF2,FGF9,FOXL1,F…
6_Member	GO Biological Processes	GO:0072359	circulatory system development	-30.9559	-27.851	297/921	25,59,70,94,101,133,182,196,283,284,287,290,302,306,347,348,387,388,409,576,577,585,639,650,652,672,677,694,727,790,857,861,891,983,1000,1012,1277,1281,1295,1301,1363,1464,1490,1491,1634,1717,1832,1848,1855,1889,1901,1906,1909,1948,1950,1958,1960,1969,2004,2034,2047,2048,2057,2064,2065,2113,2152,2185,2200,2246,2247,2254,2300,2308,2321,2335,2539,2548,2549,2648,2697,2776,2852,3037,3082,3162,3164,32…	ABL1,ACTA2,ACTC1,ACVRL1,ADAM8,ADM,JAG1,AHR,ANG,ANGPT1,ANK2,ANPEP,ANXA2,ANXA3,APOD,APOE,RHOA,RHOB,ARRB2,ADGRB2,ADGRB3,BBS4,PRDM1,BMP2,BMP4,BRCA1,ZFP36L1,BTG1,C5,CAD,CAV1,RUNX1,CCNB1,CDK1,CDH2,CDH13,COL1A1,COL3A1,COL8A1,COL11A1,CPE,CSPG4,CTGF,CTH,DCN,DHCR7,DSP,DUSP6,DVL1,ECE1,S1PR1,EDN1,EDNRA,EFNB2,EGF,EGR1,EGR3,EPHA2,ELK3,EPAS1,EPHB1,EPHB2,EPOR,ERBB2,ERBB3,ETS1,F3,PTK2B,FBN1,FGF1,FGF2,FGF9,FOXL1,F…
6_Member	GO Biological Processes	GO:0048646	anatomical structure formation involved in morphogenesis	-23.4773	-20.527	284/953	25,70,71,87,94,100,101,133,182,220,283,284,287,290,302,306,347,387,388,576,577,585,652,672,694,727,793,824,842,857,861,948,1012,1073,1277,1290,1291,1295,1301,1303,1464,1490,1634,1843,1848,1855,1901,1906,1909,1948,1950,1960,1969,2004,2034,2047,2048,2064,2067,2113,2114,2152,2185,2201,2246,2247,2254,2297,2308,2321,2323,2335,2648,3082,3162,3164,3200,3202,3207,3280,3315,3491,3553,3566,3576,3624,3655,3…	ABL1,ACTC1,ACTG1,ACTN1,ACVRL1,ADA,ADAM8,ADM,JAG1,ALDH1A3,ANG,ANGPT1,ANK2,ANPEP,ANXA2,ANXA3,APOD,RHOA,RHOB,ADGRB2,ADGRB3,BBS4,BMP4,BRCA1,BTG1,C5,CALB1,CAPN2,CASP9,CAV1,RUNX1,CD36,CDH13,CFL2,COL1A1,COL5A2,COL6A1,COL8A1,COL11A1,COL12A1,CSPG4,CTGF,DCN,DUSP1,DUSP6,DVL1,S1PR1,EDN1,EDNRA,EFNB2,EGF,EGR3,EPHA2,ELK3,EPAS1,EPHB1,EPHB2,ERBB2,ERCC1,ETS1,ETS2,F3,PTK2B,FBN2,FGF1,FGF2,FGF9,FOXD1,FOXO1,FLT1,FLT3L…
6_Member	GO Biological Processes	GO:0001944	vasculature development	-22.1685	-19.333	198/598	59,94,101,133,182,196,283,284,290,302,306,347,348,387,388,576,577,639,652,672,677,694,727,857,861,1000,1012,1277,1281,1295,1464,1490,1491,1634,1717,1901,1906,1909,1948,1950,1958,1960,1969,2004,2034,2047,2048,2064,2113,2152,2185,2246,2247,2254,2308,2321,2335,2852,3037,3082,3162,3164,3200,3202,3280,3315,3491,3553,3576,3688,3690,3791,3815,3911,3953,4015,4016,4041,4052,4091,4211,4240,4303,4627,4691,4…	ACTA2,ACVRL1,ADAM8,ADM,JAG1,AHR,ANG,ANGPT1,ANPEP,ANXA2,ANXA3,APOD,APOE,RHOA,RHOB,ADGRB2,ADGRB3,PRDM1,BMP4,BRCA1,ZFP36L1,BTG1,C5,CAV1,RUNX1,CDH2,CDH13,COL1A1,COL3A1,COL8A1,CSPG4,CTGF,CTH,DCN,DHCR7,S1PR1,EDN1,EDNRA,EFNB2,EGF,EGR1,EGR3,EPHA2,ELK3,EPAS1,EPHB1,EPHB2,ERBB2,ETS1,F3,PTK2B,FGF1,FGF2,FGF9,FOXO1,FLT1,FN1,GPER1,HAS2,HGF,HMOX1,NR4A1,HOXA3,HOXA5,HES1,HSPB1,CYR61,IL1B,CXCL8,ITGB1,ITGB3,KDR,KIT,…
6_Member	GO Biological Processes	GO:0072358	cardiovascular system development	-22.1027	-19.299	200/607	25,59,94,101,133,182,196,283,284,290,302,306,347,348,387,388,576,577,639,652,672,677,694,727,857,861,1000,1012,1277,1281,1295,1464,1490,1491,1634,1717,1901,1906,1909,1948,1950,1958,1960,1969,2004,2034,2047,2048,2064,2113,2152,2185,2246,2247,2254,2308,2321,2335,2852,3037,3082,3162,3164,3200,3202,3280,3315,3491,3553,3576,3688,3690,3791,3815,3911,3953,4015,4016,4041,4052,4091,4211,4240,4303,4627,469…	ABL1,ACTA2,ACVRL1,ADAM8,ADM,JAG1,AHR,ANG,ANGPT1,ANPEP,ANXA2,ANXA3,APOD,APOE,RHOA,RHOB,ADGRB2,ADGRB3,PRDM1,BMP4,BRCA1,ZFP36L1,BTG1,C5,CAV1,RUNX1,CDH2,CDH13,COL1A1,COL3A1,COL8A1,CSPG4,CTGF,CTH,DCN,DHCR7,S1PR1,EDN1,EDNRA,EFNB2,EGF,EGR1,EGR3,EPHA2,ELK3,EPAS1,EPHB1,EPHB2,ERBB2,ETS1,F3,PTK2B,FGF1,FGF2,FGF9,FOXO1,FLT1,FN1,GPER1,HAS2,HGF,HMOX1,NR4A1,HOXA3,HOXA5,HES1,HSPB1,CYR61,IL1B,CXCL8,ITGB1,ITGB3,KDR…
6_Member	GO Biological Processes	GO:0001568	blood vessel development	-21.4809	-18.707	191/576	59,94,101,133,182,196,283,284,290,302,306,347,348,387,388,576,577,639,652,672,677,694,727,857,861,1000,1012,1277,1281,1295,1464,1490,1634,1717,1901,1906,1909,1948,1950,1958,1960,1969,2004,2034,2047,2048,2064,2113,2152,2185,2246,2247,2254,2308,2321,2335,2852,3037,3082,3162,3164,3200,3202,3280,3315,3491,3553,3576,3688,3690,3791,3911,3953,4015,4016,4041,4052,4091,4211,4240,4303,4627,4691,4734,4776,4…	ACTA2,ACVRL1,ADAM8,ADM,JAG1,AHR,ANG,ANGPT1,ANPEP,ANXA2,ANXA3,APOD,APOE,RHOA,RHOB,ADGRB2,ADGRB3,PRDM1,BMP4,BRCA1,ZFP36L1,BTG1,C5,CAV1,RUNX1,CDH2,CDH13,COL1A1,COL3A1,COL8A1,CSPG4,CTGF,DCN,DHCR7,S1PR1,EDN1,EDNRA,EFNB2,EGF,EGR1,EGR3,EPHA2,ELK3,EPAS1,EPHB1,EPHB2,ERBB2,ETS1,F3,PTK2B,FGF1,FGF2,FGF9,FOXO1,FLT1,FN1,GPER1,HAS2,HGF,HMOX1,NR4A1,HOXA3,HOXA5,HES1,HSPB1,CYR61,IL1B,CXCL8,ITGB1,ITGB3,KDR,LAMA5,LE…
6_Member	GO Biological Processes	GO:0048514	blood vessel morphogenesis	-20.1011	-17.394	167/491	94,101,133,182,283,284,290,302,306,347,348,387,388,576,577,639,652,672,677,694,727,857,861,1000,1012,1281,1295,1464,1490,1634,1901,1906,1909,1948,1950,1960,1969,2004,2034,2047,2048,2064,2113,2152,2185,2246,2247,2254,2321,2335,3037,3082,3162,3164,3200,3202,3280,3315,3491,3553,3576,3688,3690,3791,3911,3953,4015,4041,4211,4240,4303,4627,4691,4734,4776,4854,4856,5054,5154,5156,5159,5176,5308,5547,559…	ACVRL1,ADAM8,ADM,JAG1,ANG,ANGPT1,ANPEP,ANXA2,ANXA3,APOD,APOE,RHOA,RHOB,ADGRB2,ADGRB3,PRDM1,BMP4,BRCA1,ZFP36L1,BTG1,C5,CAV1,RUNX1,CDH2,CDH13,COL3A1,COL8A1,CSPG4,CTGF,DCN,S1PR1,EDN1,EDNRA,EFNB2,EGF,EGR3,EPHA2,ELK3,EPAS1,EPHB1,EPHB2,ERBB2,ETS1,F3,PTK2B,FGF1,FGF2,FGF9,FLT1,FN1,HAS2,HGF,HMOX1,NR4A1,HOXA3,HOXA5,HES1,HSPB1,CYR61,IL1B,CXCL8,ITGB1,ITGB3,KDR,LAMA5,LEPR,LOX,LRP5,MEIS1,MFGE8,FOXO4,MYH9,NCL,N…
6_Member	GO Biological Processes	GO:0001525	angiogenesis	-17.1066	-14.571	140/410	94,101,133,182,283,284,290,302,306,347,387,388,576,577,652,672,694,727,857,861,1012,1295,1464,1490,1634,1901,1906,1909,1948,1950,1960,1969,2004,2034,2047,2048,2064,2113,2152,2185,2246,2247,2254,2321,2335,3082,3162,3164,3200,3202,3315,3491,3553,3576,3688,3690,3791,3911,3953,4211,4240,4303,4627,4691,4776,4854,4856,5054,5154,5156,5159,5176,5308,5547,5598,5764,5787,5797,6095,6303,6422,7015,7042,7045,…	ACVRL1,ADAM8,ADM,JAG1,ANG,ANGPT1,ANPEP,ANXA2,ANXA3,APOD,RHOA,RHOB,ADGRB2,ADGRB3,BMP4,BRCA1,BTG1,C5,CAV1,RUNX1,CDH13,COL8A1,CSPG4,CTGF,DCN,S1PR1,EDN1,EDNRA,EFNB2,EGF,EGR3,EPHA2,ELK3,EPAS1,EPHB1,EPHB2,ERBB2,ETS1,F3,PTK2B,FGF1,FGF2,FGF9,FLT1,FN1,HGF,HMOX1,NR4A1,HOXA3,HOXA5,HSPB1,CYR61,IL1B,CXCL8,ITGB1,ITGB3,KDR,LAMA5,LEPR,MEIS1,MFGE8,FOXO4,MYH9,NCL,NFATC4,NOTCH3,NOV,SERPINE1,PDGFA,PDGFRA,PDGFRB,SERP…
6_Member	GO Biological Processes	GO:1901342	regulation of vasculature development	-10.4237	-8.472	82/239	94,133,306,387,388,576,577,652,672,694,727,861,1491,1634,1948,1958,1969,2064,2113,2152,2185,2246,2247,2321,2852,3082,3162,3202,3315,3553,3576,3791,3815,4303,5054,5154,5155,5176,5598,5764,5797,6422,7015,7058,7128,7291,7422,7424,7474,7498,8710,8742,8877,9037,9314,9475,9734,10411,10457,10553,23213,23328,23576,25960,27286,28514,28984,28996,51129,51330,51752,54361,54567,79805,80149,80310,90627,93649,1…	ACVRL1,ADM,ANXA3,RHOA,RHOB,ADGRB2,ADGRB3,BMP4,BRCA1,BTG1,C5,RUNX1,CTH,DCN,EFNB2,EGR1,EPHA2,ERBB2,ETS1,F3,PTK2B,FGF1,FGF2,FLT1,GPER1,HGF,HMOX1,HOXA5,HSPB1,IL1B,CXCL8,KDR,KIT,FOXO4,SERPINE1,PDGFA,PDGFB,SERPINF1,MAPK7,PTN,PTPRM,SFRP1,TERT,THBS2,TNFAIP3,TWIST1,VEGFA,VEGFC,WNT5A,XDH,SERPINB7,TNFSF12,SPHK1,SEMA5A,KLF4,ROCK2,HDAC9,RAPGEF3,GPNMB,HTATIP2,SULF1,SASH1,DDAH1,ADGRA2,SRPX2,DLL1,RGCC,HIPK2,ANGP…
6_Member	GO Biological Processes	GO:0045765	regulation of angiogenesis	-10.369	-8.426	62/215	94,133,306,388,576,577,672,694,727,861,1634,1969,2064,2185,2246,2321,3082,3162,3202,3315,3553,3576,3791,4303,5176,5598,5764,5797,6422,7015,7128,7291,7422,7424,7474,8742,8877,9037,9314,9475,9734,10411,10457,10553,23213,23328,25960,27286,28514,28984,28996,51129,51330,51752,54567,79805,80149,90627,126393,147372,153090,154796	ACVRL1,ADM,ANXA3,RHOB,ADGRB2,ADGRB3,BRCA1,BTG1,C5,RUNX1,DCN,EPHA2,ERBB2,PTK2B,FGF1,FLT1,HGF,HMOX1,HOXA5,HSPB1,IL1B,CXCL8,KDR,FOXO4,SERPINF1,MAPK7,PTN,PTPRM,SFRP1,TERT,TNFAIP3,TWIST1,VEGFA,VEGFC,WNT5A,TNFSF12,SPHK1,SEMA5A,KLF4,ROCK2,HDAC9,RAPGEF3,GPNMB,HTATIP2,SULF1,SASH1,ADGRA2,SRPX2,DLL1,RGCC,HIPK2,ANGPTL4,TNFRSF12A,ERAP1,DLL4,VASH2,ZC3H12A,STARD13,HSPB6,CCBE1,DAB2IP,AMOT
6_Member	GO Biological Processes	GO:1904018	positive regulation of vasculature development	-9.84262	-7.936	43/139	94,306,672,694,727,861,1948,1958,2113,2152,2246,2247,2321,2852,3082,3162,3315,3553,3576,3791,3815,5054,5155,7015,7422,7424,7474,8710,8742,8877,9037,9734,10411,23328,23576,27286,51129,51752,79805,80310,93649,126393,147372	ACVRL1,ANXA3,BRCA1,BTG1,C5,RUNX1,EFNB2,EGR1,ETS1,F3,FGF1,FGF2,FLT1,GPER1,HGF,HMOX1,HSPB1,IL1B,CXCL8,KDR,KIT,SERPINE1,PDGFB,TERT,VEGFA,VEGFC,WNT5A,SERPINB7,TNFSF12,SPHK1,SEMA5A,HDAC9,RAPGEF3,SASH1,DDAH1,SRPX2,ANGPTL4,ERAP1,VASH2,PDGFD,MYOCD,HSPB6,CCBE1
6_Member	GO Biological Processes	GO:0045766	positive regulation of angiogenesis	-7.21474	-5.554	35/122	94,306,672,694,727,861,2113,2152,2246,2247,2321,3082,3162,3315,3553,3576,3791,5054,7015,7422,7424,7474,8742,8877,9037,9734,10411,23328,23576,27286,51129,51752,79805,126393,147372	ACVRL1,ANXA3,BRCA1,BTG1,C5,RUNX1,ETS1,F3,FGF1,FGF2,FLT1,HGF,HMOX1,HSPB1,IL1B,CXCL8,KDR,SERPINE1,TERT,VEGFA,VEGFC,WNT5A,TNFSF12,SPHK1,SEMA5A,HDAC9,RAPGEF3,SASH1,DDAH1,SRPX2,ANGPTL4,ERAP1,VASH2,HSPB6,CCBE1
7_Summary	Reactome Gene Sets	R-HSA-453279	Mitotic G1-G1/S phases	-30.1352	-27.475	58/145	23649,5422,55388,1719,6117,286826,5708,5426,10000,6241,4605,990,8317,890,7298,9134,5699,81620,1163,5557,5558,5700,4609,5702,5705,7153,5111,1031,1029,5933,1032,23594,993,4998,4176,4175,4174,4173,4172,4171,6502,4331,84515,891,1870,1869,595,5717,6119,983,1017,10926,5427,1021,8318,132660,7027,26271,1763,2237,3978,5424,5983,5984,5985,9837,10714,23198,51053,51659,64785,84296,328,596,995,1033,1104,1978,…	POLA2,POLA1,MCM10,DHFR,RPA1,LIN9,PSMD2,POLE,AKT3,RRM2,MYBL2,CDC6,CDC7,CCNA2,TYMS,CCNE2,PSMB10,CDT1,CKS1B,PRIM1,PRIM2,PSMC1,MYC,PSMC3,PSMC5,TOP2A,PCNA,CDKN2C,CDKN2A,RBL1,CDKN2D,ORC6,CDC25A,ORC1,MCM7,MCM6,MCM5,MCM4,MCM3,MCM2,SKP2,MNAT1,MCM8,CCNB1,E2F2,E2F1,CCND1,PSMD11,RPA3,CDK1,CDK2,DBF4,POLE2,CDK6,CDC45,LIN54,TFDP1,FBXO5,DNA2,FEN1,LIG1,POLD1,RFC3,RFC4,RFC5,GINS1,POLD3,PSME4,GMNN,GINS2,GINS3,GINS4…
7_Member	Reactome Gene Sets	R-HSA-453279	Mitotic G1-G1/S phases	-30.1352	-27.475	58/145	23649,5422,55388,1719,6117,286826,5708,5426,10000,6241,4605,990,8317,890,7298,9134,5699,81620,1163,5557,5558,5700,4609,5702,5705,7153,5111,1031,1029,5933,1032,23594,993,4998,4176,4175,4174,4173,4172,4171,6502,4331,84515,891,1870,1869,595,5717,6119,983,1017,10926,5427,1021,8318,132660,7027,26271	POLA2,POLA1,MCM10,DHFR,RPA1,LIN9,PSMD2,POLE,AKT3,RRM2,MYBL2,CDC6,CDC7,CCNA2,TYMS,CCNE2,PSMB10,CDT1,CKS1B,PRIM1,PRIM2,PSMC1,MYC,PSMC3,PSMC5,TOP2A,PCNA,CDKN2C,CDKN2A,RBL1,CDKN2D,ORC6,CDC25A,ORC1,MCM7,MCM6,MCM5,MCM4,MCM3,MCM2,SKP2,MNAT1,MCM8,CCNB1,E2F2,E2F1,CCND1,PSMD11,RPA3,CDK1,CDK2,DBF4,POLE2,CDK6,CDC45,LIN54,TFDP1,FBXO5
7_Member	Reactome Gene Sets	R-HSA-69306	DNA Replication	-28.3713	-25.754	47/111	890,990,1017,1763,1869,1870,2237,3978,4171,4172,4173,4174,4175,4176,4998,5111,5422,5424,5426,5427,5557,5558,5700,5702,5705,5708,5717,5983,5984,5985,6117,6119,8317,8318,9837,10714,10926,23198,23594,23649,51053,51659,55388,64785,81620,84296,84515	CCNA2,CDC6,CDK2,DNA2,E2F1,E2F2,FEN1,LIG1,MCM2,MCM3,MCM4,MCM5,MCM6,MCM7,ORC1,PCNA,POLA1,POLD1,POLE,POLE2,PRIM1,PRIM2,PSMC1,PSMC3,PSMC5,PSMD2,PSMD11,RFC3,RFC4,RFC5,RPA1,RPA3,CDC7,CDC45,GINS1,POLD3,DBF4,PSME4,ORC6,POLA2,GMNN,GINS2,MCM10,GINS3,CDT1,GINS4,MCM8
7_Member	GO Biological Processes	GO:0044843	cell cycle G1/S phase transition	-27.0413	-24.453	68/250	328,595,596,890,891,983,990,993,995,1017,1021,1029,1031,1032,1033,1104,1719,1869,1978,2146,2935,3398,3688,4171,4172,4173,4174,4175,4176,4331,4869,4998,5111,5422,5426,5427,5557,5558,5591,5902,5932,6117,6119,6241,6790,7027,7298,8317,8318,9134,9928,10769,10926,23594,23649,26271,27085,51512,55159,55388,55835,57060,57695,81610,81620,84515,128239,144455	APEX1,CCND1,BCL2,CCNA2,CCNB1,CDK1,CDC6,CDC25A,CDC25C,CDK2,CDK6,CDKN2A,CDKN2C,CDKN2D,CDKN3,RCC1,DHFR,E2F1,EIF4EBP1,EZH2,GSPT1,ID2,ITGB1,MCM2,MCM3,MCM4,MCM5,MCM6,MCM7,MNAT1,NPM1,ORC1,PCNA,POLA1,POLE,POLE2,PRIM1,PRIM2,PRKDC,RANBP1,RBBP8,RPA1,RPA3,RRM2,AURKA,TFDP1,TYMS,CDC7,CDC45,CCNE2,KIF14,PLK2,DBF4,ORC6,POLA2,FBXO5,MTBP,GTSE1,RFWD3,MCM10,CENPJ,PCBP4,USP37,FAM83D,CDT1,MCM8,IQGAP3,E2F7
7_Member	Reactome Gene Sets	R-HSA-68962	Activation of the pre-replicative complex	-22.9772	-20.482	24/32	990,1017,4171,4172,4173,4174,4175,4176,4998,5422,5426,5427,5557,5558,6117,6119,8317,8318,10926,23594,23649,55388,81620,84515	CDC6,CDK2,MCM2,MCM3,MCM4,MCM5,MCM6,MCM7,ORC1,POLA1,POLE,POLE2,PRIM1,PRIM2,RPA1,RPA3,CDC7,CDC45,DBF4,ORC6,POLA2,MCM10,CDT1,MCM8
7_Member	KEGG Pathway	hsa03030	DNA replication	-20.9989	-18.574	24/36	1763,2237,3978,4171,4172,4173,4174,4175,4176,5111,5422,5424,5426,5427,5557,5558,5983,5984,5985,6117,6119,10535,10714,23649	DNA2,FEN1,LIG1,MCM2,MCM3,MCM4,MCM5,MCM6,MCM7,PCNA,POLA1,POLD1,POLE,POLE2,PRIM1,PRIM2,RFC3,RFC4,RFC5,RPA1,RPA3,RNASEH2A,POLD3,POLA2
8_Summary	GO Biological Processes	GO:0000075	cell cycle checkpoint	-28.8774	-26.239	66/221	595,641,672,699,701,891,983,990,995,1017,1063,1763,1869,2189,3014,3265,4085,4361,4436,4869,5111,5347,5591,5932,6790,7027,7153,7272,7517,8091,8243,8318,8682,9134,9184,9212,9575,9735,10403,10769,11073,11130,25906,51512,51514,51776,54908,54962,55055,55159,55215,55835,57060,57082,63967,64858,81620,83903,83990,84126,84444,90381,144455,146956,220064,348654,328,387,894,1263,1490,1663,1894,1906,1950,2237…	CCND1,BLM,BRCA1,BUB1,BUB1B,CCNB1,CDK1,CDC6,CDC25C,CDK2,CENPF,DNA2,E2F1,FANCG,H2AFX,HRAS,MAD2L1,MRE11,MSH2,NPM1,PCNA,PLK1,PRKDC,RBBP8,AURKA,TFDP1,TOP2A,TTK,XRCC3,HMGA2,SMC1A,CDC45,PEA15,CCNE2,BUB3,AURKB,CLOCK,KNTC1,NDC80,PLK2,TOPBP1,ZWINT,ANAPC15,GTSE1,DTL,MAP3K20,SPDL1,TIPIN,ZWILCH,RFWD3,FANCI,CENPJ,PCBP4,KNL1,CLSPN,DCLRE1B,CDT1,GSG2,BRIP1,ATRIP,DOT1L,TICRR,E2F7,EME1,ORAOV1,GEN1,APEX1,RHOA,CCND2,…
8_Member	GO Biological Processes	GO:0000075	cell cycle checkpoint	-28.8774	-26.239	66/221	595,641,672,699,701,891,983,990,995,1017,1063,1763,1869,2189,3014,3265,4085,4361,4436,4869,5111,5347,5591,5932,6790,7027,7153,7272,7517,8091,8243,8318,8682,9134,9184,9212,9575,9735,10403,10769,11073,11130,25906,51512,51514,51776,54908,54962,55055,55159,55215,55835,57060,57082,63967,64858,81620,83903,83990,84126,84444,90381,144455,146956,220064,348654	CCND1,BLM,BRCA1,BUB1,BUB1B,CCNB1,CDK1,CDC6,CDC25C,CDK2,CENPF,DNA2,E2F1,FANCG,H2AFX,HRAS,MAD2L1,MRE11,MSH2,NPM1,PCNA,PLK1,PRKDC,RBBP8,AURKA,TFDP1,TOP2A,TTK,XRCC3,HMGA2,SMC1A,CDC45,PEA15,CCNE2,BUB3,AURKB,CLOCK,KNTC1,NDC80,PLK2,TOPBP1,ZWINT,ANAPC15,GTSE1,DTL,MAP3K20,SPDL1,TIPIN,ZWILCH,RFWD3,FANCI,CENPJ,PCBP4,KNL1,CLSPN,DCLRE1B,CDT1,GSG2,BRIP1,ATRIP,DOT1L,TICRR,E2F7,EME1,ORAOV1,GEN1
8_Member	GO Biological Processes	GO:0090068	positive regulation of cell cycle process	-19.6962	-17.002	67/243	328,387,595,672,891,894,983,990,995,1017,1263,1490,1663,1869,1894,1906,1950,2237,3398,3481,4085,4869,5111,5155,5885,5902,6659,6790,6840,7015,7027,7474,7517,8091,8317,8318,8450,8502,8851,9212,9493,9585,9700,9787,9928,10403,10733,10755,10769,11065,11113,25886,27085,29127,51203,51512,54361,55835,57060,79733,80174,81610,84250,113130,144455,201161,348654	APEX1,RHOA,CCND1,BRCA1,CCNB1,CCND2,CDK1,CDC6,CDC25C,CDK2,PLK3,CTGF,DDX11,E2F1,ECT2,EDN1,EGF,FEN1,ID2,IGF2,MAD2L1,NPM1,PCNA,PDGFB,RAD21,RANBP1,SOX4,AURKA,SVIL,TERT,TFDP1,WNT5A,XRCC3,HMGA2,CDC7,CDC45,CUL4B,PKP4,CDK5R1,AURKB,KIF23,KIF20B,ESPL1,DLGAP5,KIF14,NDC80,PLK4,GIPC1,PLK2,UBE2C,CIT,POC1A,MTBP,RACGAP1,NUSAP1,GTSE1,WNT4,CENPJ,PCBP4,E2F8,DBF4B,FAM83D,SLF1,CDCA5,E2F7,CENPV,GEN1
8_Member	GO Biological Processes	GO:0045787	positive regulation of cell cycle	-19.4106	-16.739	80/332	328,387,440,595,672,675,891,894,983,990,995,1017,1163,1263,1490,1663,1869,1894,1906,1950,1978,2237,2852,3280,3398,3481,4085,4331,4824,4869,5111,5155,5885,5902,6659,6790,6840,7015,7023,7027,7042,7051,7474,7517,8061,8091,8317,8318,8450,8502,8851,9212,9493,9585,9700,9787,9928,10403,10733,10755,10769,11065,11113,25886,27085,29127,51203,51512,54361,55835,57060,79733,80174,81610,84250,84722,113130,1444…	APEX1,RHOA,ASNS,CCND1,BRCA1,BRCA2,CCNB1,CCND2,CDK1,CDC6,CDC25C,CDK2,CKS1B,PLK3,CTGF,DDX11,E2F1,ECT2,EDN1,EGF,EIF4EBP1,FEN1,GPER1,HES1,ID2,IGF2,MAD2L1,MNAT1,NKX3-1,NPM1,PCNA,PDGFB,RAD21,RANBP1,SOX4,AURKA,SVIL,TERT,TFAP4,TFDP1,TGFB2,TGM1,WNT5A,XRCC3,FOSL1,HMGA2,CDC7,CDC45,CUL4B,PKP4,CDK5R1,AURKB,KIF23,KIF20B,ESPL1,DLGAP5,KIF14,NDC80,PLK4,GIPC1,PLK2,UBE2C,CIT,POC1A,MTBP,RACGAP1,NUSAP1,GTSE1,WNT4,CEN…
8_Member	GO Biological Processes	GO:1901990	regulation of mitotic cell cycle phase transition	-19.3735	-16.974	65/308	328,595,596,641,699,701,890,891,983,990,991,995,1017,1021,1062,1063,1869,2146,3398,4085,4361,4869,5111,5347,5569,5591,5700,5702,5705,5708,5717,6790,7027,7272,7517,8091,8317,8318,9184,9700,9735,9787,9928,10403,10769,11065,11073,23198,25906,26271,27085,51512,54443,55159,55215,55835,57060,63967,79915,80174,90381,113130,144455,220064,348654	APEX1,CCND1,BCL2,BLM,BUB1,BUB1B,CCNA2,CCNB1,CDK1,CDC6,CDC20,CDC25C,CDK2,CDK6,CENPE,CENPF,E2F1,EZH2,ID2,MAD2L1,MRE11,NPM1,PCNA,PLK1,PKIA,PRKDC,PSMC1,PSMC3,PSMC5,PSMD2,PSMD11,AURKA,TFDP1,TTK,XRCC3,HMGA2,CDC7,CDC45,BUB3,ESPL1,KNTC1,DLGAP5,KIF14,NDC80,PLK2,UBE2C,TOPBP1,PSME4,ANAPC15,FBXO5,MTBP,GTSE1,ANLN,RFWD3,FANCI,CENPJ,PCBP4,CLSPN,ATAD5,DBF4B,TICRR,CDCA5,E2F7,ORAOV1,GEN1
8_Member	GO Biological Processes	GO:0000077	DNA damage checkpoint	-14.2708	-12.15	38/150	595,641,672,891,983,995,1017,1869,3014,4361,4436,4869,5111,5347,5591,5932,6790,7027,8091,8682,9575,10769,11073,51512,51514,51776,54962,55159,55215,55835,57060,63967,83990,84126,84444,144455,146956,220064	CCND1,BLM,BRCA1,CCNB1,CDK1,CDC25C,CDK2,E2F1,H2AFX,MRE11,MSH2,NPM1,PCNA,PLK1,PRKDC,RBBP8,AURKA,TFDP1,HMGA2,PEA15,CLOCK,PLK2,TOPBP1,GTSE1,DTL,MAP3K20,TIPIN,RFWD3,FANCI,CENPJ,PCBP4,CLSPN,BRIP1,ATRIP,DOT1L,E2F7,EME1,ORAOV1
8_Member	GO Biological Processes	GO:1901991	negative regulation of mitotic cell cycle phase transition	-13.7314	-11.642	43/195	595,596,641,699,701,891,983,995,1017,1063,1869,2146,4085,4361,4869,5111,5347,5591,5700,5702,5705,5708,5717,6790,7027,7272,7517,8091,10403,10769,11073,23198,25906,51512,55159,55215,55835,57060,63967,90381,144455,220064,348654	CCND1,BCL2,BLM,BUB1,BUB1B,CCNB1,CDK1,CDC25C,CDK2,CENPF,E2F1,EZH2,MAD2L1,MRE11,NPM1,PCNA,PLK1,PRKDC,PSMC1,PSMC3,PSMC5,PSMD2,PSMD11,AURKA,TFDP1,TTK,XRCC3,HMGA2,NDC80,PLK2,TOPBP1,PSME4,ANAPC15,GTSE1,RFWD3,FANCI,CENPJ,PCBP4,CLSPN,TICRR,E2F7,ORAOV1,GEN1
8_Member	GO Biological Processes	GO:1902806	regulation of cell cycle G1/S phase transition	-8.72154	-6.912	35/147	328,595,596,891,894,983,990,995,1017,1030,1263,1869,2146,3398,4869,5111,5591,6659,6790,7015,7027,8318,8450,9928,10630,10769,27085,51339,51512,55159,55835,56892,57060,81610,144455	APEX1,CCND1,BCL2,CCNB1,CCND2,CDK1,CDC6,CDC25C,CDK2,CDKN2B,PLK3,E2F1,EZH2,ID2,NPM1,PCNA,PRKDC,SOX4,AURKA,TERT,TFDP1,CDC45,CUL4B,KIF14,PDPN,PLK2,MTBP,DACT1,GTSE1,RFWD3,CENPJ,C8orf4,PCBP4,FAM83D,E2F7
8_Member	GO Biological Processes	GO:2000045	regulation of G1/S transition of mitotic cell cycle	-8.57224	-6.784	33/135	328,595,596,891,894,983,990,995,1017,1030,1263,1869,2146,3398,4869,5111,5591,6659,6790,7015,7027,8318,8450,9928,10630,10769,27085,51339,51512,55159,55835,57060,144455	APEX1,CCND1,BCL2,CCNB1,CCND2,CDK1,CDC6,CDC25C,CDK2,CDKN2B,PLK3,E2F1,EZH2,ID2,NPM1,PCNA,PRKDC,SOX4,AURKA,TERT,TFDP1,CDC45,CUL4B,KIF14,PDPN,PLK2,MTBP,DACT1,GTSE1,RFWD3,CENPJ,PCBP4,E2F7
8_Member	GO Biological Processes	GO:0007050	cell cycle arrest	-8.13268	-6.557	39/244	580,595,672,891,983,995,1017,1021,1029,1031,1032,1033,1869,2305,2852,3265,3398,4436,4824,4869,5036,5111,6790,7023,7027,8091,8851,9585,10634,10769,23645,27085,51512,51776,55771,55835,57060,144455,220042	BARD1,CCND1,BRCA1,CCNB1,CDK1,CDC25C,CDK2,CDK6,CDKN2A,CDKN2C,CDKN2D,CDKN3,E2F1,FOXM1,GPER1,HRAS,ID2,MSH2,NKX3-1,NPM1,PA2G4,PCNA,AURKA,TFAP4,TFDP1,HMGA2,CDK5R1,KIF20B,GAS2L1,PLK2,PPP1R15A,MTBP,GTSE1,MAP3K20,PRR11,CENPJ,PCBP4,E2F7,DDIAS
8_Member	GO Biological Processes	GO:0071156	regulation of cell cycle arrest	-6.85875	-5.431	22/106	595,672,891,983,995,1017,1869,2305,2852,3398,4869,5111,6790,7023,7027,8091,8851,10769,51512,55835,57060,144455	CCND1,BRCA1,CCNB1,CDK1,CDC25C,CDK2,E2F1,FOXM1,GPER1,ID2,NPM1,PCNA,AURKA,TFAP4,TFDP1,HMGA2,CDK5R1,PLK2,GTSE1,CENPJ,PCBP4,E2F7
8_Member	GO Biological Processes	GO:1902400	intracellular signal transduction involved in G1 DNA damage checkpoint	-5.85318	-4.556	15/61	891,983,995,1017,1869,4869,5111,5591,6790,7027,10769,51512,55835,57060,144455	CCNB1,CDK1,CDC25C,CDK2,E2F1,NPM1,PCNA,PRKDC,AURKA,TFDP1,PLK2,GTSE1,CENPJ,PCBP4,E2F7
8_Member	GO Biological Processes	GO:1902403	signal transduction involved in mitotic DNA integrity checkpoint	-5.75656	-4.475	15/62	891,983,995,1017,1869,4869,5111,5591,6790,7027,10769,51512,55835,57060,144455	CCNB1,CDK1,CDC25C,CDK2,E2F1,NPM1,PCNA,PRKDC,AURKA,TFDP1,PLK2,GTSE1,CENPJ,PCBP4,E2F7
8_Member	GO Biological Processes	GO:1902402	signal transduction involved in mitotic DNA damage checkpoint	-5.75656	-4.475	15/62	891,983,995,1017,1869,4869,5111,5591,6790,7027,10769,51512,55835,57060,144455	CCNB1,CDK1,CDC25C,CDK2,E2F1,NPM1,PCNA,PRKDC,AURKA,TFDP1,PLK2,GTSE1,CENPJ,PCBP4,E2F7
8_Member	GO Biological Processes	GO:0072401	signal transduction involved in DNA integrity checkpoint	-5.56981	-4.318	15/64	891,983,995,1017,1869,4869,5111,5591,6790,7027,10769,51512,55835,57060,144455	CCNB1,CDK1,CDC25C,CDK2,E2F1,NPM1,PCNA,PRKDC,AURKA,TFDP1,PLK2,GTSE1,CENPJ,PCBP4,E2F7
9_Summary	GO Biological Processes	GO:0022603	regulation of anatomical structure morphogenesis	-26.8138	-23.739	215/927	81,94,100,306,387,396,409,596,650,672,694,708,727,860,861,948,1002,1072,1123,1382,1436,1690,1723,1729,1848,1855,1902,1906,1946,1948,1952,1969,2043,2048,2113,2118,2119,2152,2242,2246,2247,2321,2323,2335,2534,2633,3037,3082,3162,3280,3315,3553,3566,3576,3679,3706,3791,3815,3897,3955,3987,4131,4241,4478,4487,4609,4627,4651,4654,4734,4803,4982,5054,5058,5154,5176,5216,5362,5447,5699,5700,5702,5705,57…	ACTN4,ACVRL1,ADA,ANXA3,RHOA,ARHGDIA,ARRB2,BCL2,BMP2,BRCA1,BTG1,C1QBP,C5,RUNX2,RUNX1,CD36,CDH4,CFL1,CHN1,CRABP2,CSF1R,COCH,DHODH,DIAPH1,DUSP6,DVL1,LPAR1,EDN1,EFNA5,EFNB2,CELSR2,EPHA2,EPHA4,EPHB2,ETS1,ETV4,ETV5,F3,FES,FGF1,FGF2,FLT1,FLT3LG,FN1,FYN,GBP1,HAS2,HGF,HMOX1,HES1,HSPB1,IL1B,IL4R,CXCL8,ITGA7,ITPKA,KDR,KIT,L1CAM,LFNG,LIMS1,MAP1B,MELTF,MSN,MSX1,MYC,MYH9,MYO10,MYOD1,NEDD4,NGF,TNFRSF11B,SERPINE…
9_Member	GO Biological Processes	GO:0022603	regulation of anatomical structure morphogenesis	-26.8138	-23.739	215/927	81,94,100,306,387,396,409,596,650,672,694,708,727,860,861,948,1002,1072,1123,1382,1436,1690,1723,1729,1848,1855,1902,1906,1946,1948,1952,1969,2043,2048,2113,2118,2119,2152,2242,2246,2247,2321,2323,2335,2534,2633,3037,3082,3162,3280,3315,3553,3566,3576,3679,3706,3791,3815,3897,3955,3987,4131,4241,4478,4487,4609,4627,4651,4654,4734,4803,4982,5054,5058,5154,5176,5216,5362,5447,5699,5700,5702,5705,57…	ACTN4,ACVRL1,ADA,ANXA3,RHOA,ARHGDIA,ARRB2,BCL2,BMP2,BRCA1,BTG1,C1QBP,C5,RUNX2,RUNX1,CD36,CDH4,CFL1,CHN1,CRABP2,CSF1R,COCH,DHODH,DIAPH1,DUSP6,DVL1,LPAR1,EDN1,EFNA5,EFNB2,CELSR2,EPHA2,EPHA4,EPHB2,ETS1,ETV4,ETV5,F3,FES,FGF1,FGF2,FLT1,FLT3LG,FN1,FYN,GBP1,HAS2,HGF,HMOX1,HES1,HSPB1,IL1B,IL4R,CXCL8,ITGA7,ITPKA,KDR,KIT,L1CAM,LFNG,LIMS1,MAP1B,MELTF,MSN,MSX1,MYC,MYH9,MYO10,MYOD1,NEDD4,NGF,TNFRSF11B,SERPINE…
9_Member	GO Biological Processes	GO:0000902	cell morphogenesis	-15.4684	-13.081	182/911	81,87,104,357,387,396,558,596,708,1002,1072,1123,1191,1267,1382,1436,1690,1729,1855,1894,1902,1946,1952,1969,2043,2047,2048,2115,2118,2242,2317,2335,2534,2633,3037,3082,3251,3265,3280,3398,3575,3672,3676,3679,3688,3690,3706,3791,3799,3815,3897,3911,3925,3987,4131,4147,4233,4241,4478,4487,4627,4651,4681,4734,4803,4908,4929,5058,5295,5362,5864,5921,6092,6281,6383,6387,6405,6446,6696,6781,6790,6857,…	ACTN4,ACTN1,ADARB1,SHROOM2,RHOA,ARHGDIA,AXL,BCL2,C1QBP,CDH4,CFL1,CHN1,CLU,CNP,CRABP2,CSF1R,COCH,DIAPH1,DVL1,ECT2,LPAR1,EFNA5,CELSR2,EPHA2,EPHA4,EPHB1,EPHB2,ETV1,ETV4,FES,FLNB,FN1,FYN,GBP1,HAS2,HGF,HPRT1,HRAS,HES1,ID2,IL7R,ITGA1,ITGA4,ITGA7,ITGB1,ITGB3,ITPKA,KDR,KIF5B,KIT,L1CAM,LAMA5,STMN1,LIMS1,MAP1B,MATN2,MET,MELTF,MSN,MSX1,MYH9,MYO10,NBL1,NEDD4,NGF,NTF3,NR4A2,PAK1,PIK3R1,PLXNA2,RAB3A,RASA1,ROBO…
9_Member	GO Biological Processes	GO:0045597	positive regulation of cell differentiation	-14.469	-12.187	230/838	25,27,94,100,101,133,152,182,274,348,387,396,409,558,596,639,650,652,677,694,706,708,860,861,948,1000,1002,1051,1052,1072,1192,1277,1382,1435,1490,1491,1523,1745,1809,1855,1894,1902,1906,1946,1948,1960,2043,2048,2113,2119,2146,2185,2201,2242,2247,2281,2323,2335,2487,2534,2852,3037,3059,3082,3142,3146,3148,3202,3207,3232,3280,3299,3398,3486,3491,3566,3570,3575,3600,3624,3675,3706,3707,3717,3727,37…	ABL1,ABL2,ACVRL1,ADA,ADAM8,ADM,ADRA2C,JAG1,BIN1,APOE,RHOA,ARHGDIA,ARRB2,AXL,BCL2,PRDM1,BMP2,BMP4,ZFP36L1,BTG1,TSPO,C1QBP,RUNX2,RUNX1,CD36,CDH2,CDH4,CEBPB,CEBPD,CFL1,CLIC1,COL1A1,CRABP2,CSF1,CTGF,CTH,CUX1,DLX1,DPYSL3,DVL1,ECT2,LPAR1,EDN1,EFNA5,EFNB2,EGR3,EPHA4,EPHB2,ETS1,ETV5,EZH2,PTK2B,FBN2,FES,FGF2,FKBP1B,FLT3LG,FN1,FRZB,FYN,GPER1,HAS2,HCLS1,HGF,HLX,HMGB1,HMGB2,HOXA5,HOXA11,HOXD3,HES1,HSF4,ID2,I…
9_Member	GO Biological Processes	GO:0022604	regulation of cell morphogenesis	-14.1199	-11.877	102/422	81,387,396,708,1002,1072,1123,1382,1436,1690,1729,1902,1946,2043,2048,2242,2335,2534,2633,3037,3679,3706,3791,3815,3897,3987,4131,4241,4478,4627,4651,4734,4803,5058,5362,5921,6092,6281,6383,6387,6405,6696,6857,7070,7168,7225,7422,7430,7443,7473,7474,7533,8317,8482,8851,8997,9037,9353,9948,10097,10154,10276,10371,10395,10435,10602,10630,10979,11135,11149,11151,22871,23189,23303,23327,23433,23499,2…	ACTN4,RHOA,ARHGDIA,C1QBP,CDH4,CFL1,CHN1,CRABP2,CSF1R,COCH,DIAPH1,LPAR1,EFNA5,EPHA4,EPHB2,FES,FN1,FYN,GBP1,HAS2,ITGA7,ITPKA,KDR,KIT,L1CAM,LIMS1,MAP1B,MELTF,MSN,MYH9,MYO10,NEDD4,NGF,PAK1,PLXNA2,RASA1,ROBO2,S100A10,SDC2,CXCL12,SEMA3F,SPP1,SYT1,THY1,TPM1,TRPC6,VEGFA,EZR,VRK1,WNT3,WNT5A,YWHAH,CDC7,SEMA7A,CDK5R1,KALRN,SEMA5A,SLIT2,WDR1,ACTR2,PLXNC1,NET1,SEMA3A,DLC1,CDC42EP2,CDC42EP3,PDPN,FERMT2,CDC42EP…
9_Member	GO Biological Processes	GO:0060284	regulation of cell development	-12.3995	-10.256	152/773	27,81,182,387,396,596,650,708,983,991,1000,1002,1072,1123,1382,1627,1745,1809,1855,1894,1902,1903,1906,1910,1946,2043,2048,2119,2146,2200,2242,2281,2335,2487,2534,2633,2852,3037,3082,3148,3232,3280,3398,3553,3675,3706,3815,3897,3956,3987,4131,4211,4241,4654,4681,4734,4771,4803,4908,5058,5139,5176,5270,5362,5376,5468,5915,6092,6281,6383,6387,6405,6422,6608,6696,6770,6790,6857,6935,7015,7070,7225,7…	ABL2,ACTN4,JAG1,RHOA,ARHGDIA,BCL2,BMP2,C1QBP,CDK1,CDC20,CDH2,CDH4,CFL1,CHN1,CRABP2,DBN1,DLX1,DPYSL3,DVL1,ECT2,LPAR1,S1PR3,EDN1,EDNRB,EFNA5,EPHA4,EPHB2,ETV5,EZH2,FBN1,FES,FKBP1B,FN1,FRZB,FYN,GBP1,GPER1,HAS2,HGF,HMGB2,HOXD3,HES1,ID2,IL1B,ITGA3,ITPKA,KIT,L1CAM,LGALS1,LIMS1,MAP1B,MEIS1,MELTF,MYOD1,NBL1,NEDD4,NF2,NGF,NTF3,PAK1,PDE3A,SERPINF1,SERPINE2,PLXNA2,PMP22,PPARG,RARB,ROBO2,S100A10,SDC2,CXCL12,S…
9_Member	GO Biological Processes	GO:0031344	regulation of cell projection organization	-9.08843	-7.232	111/567	27,387,396,857,991,1002,1072,1123,1382,1627,1809,1855,1902,1946,1969,2043,2048,2146,2150,2242,2281,2335,2534,3082,3265,3673,3675,3706,3815,3897,3956,4131,4651,4734,4803,5058,5176,5205,5216,5362,5376,5420,5580,5880,5898,6092,6383,6387,6405,6422,6696,6857,7070,7225,7422,7430,7431,7473,7474,7533,8482,8507,8536,8851,8997,9037,9314,9353,10097,10154,10371,10435,10602,10769,11135,22871,23102,23189,23216…	ABL2,RHOA,ARHGDIA,CAV1,CDC20,CDH4,CFL1,CHN1,CRABP2,DBN1,DPYSL3,DVL1,LPAR1,EFNA5,EPHA2,EPHA4,EPHB2,EZH2,F2RL1,FES,FKBP1B,FN1,FYN,HGF,HRAS,ITGA2,ITGA3,ITPKA,KIT,L1CAM,LGALS1,MAP1B,MYO10,NEDD4,NGF,PAK1,SERPINF1,ATP8B1,PFN1,PLXNA2,PMP22,PODXL,PRKCD,RAC2,RALA,ROBO2,SDC2,CXCL12,SEMA3F,SFRP1,SPP1,SYT1,THY1,TRPC6,VEGFA,EZR,VIM,WNT3,WNT5A,YWHAH,SEMA7A,ENC1,CAMK1,CDK5R1,KALRN,SEMA5A,KLF4,SLIT2,ACTR2,PLXNC1…
9_Member	GO Biological Processes	GO:0010769	regulation of cell morphogenesis involved in differentiation	-8.96079	-7.121	61/249	81,387,396,708,1002,1072,1123,1382,1946,2043,2048,2335,2633,3037,3706,3897,3987,4131,4241,4734,4803,5058,5362,6092,6281,6383,6387,6405,6696,7070,7225,7422,7473,7474,7533,8482,8851,8997,9037,9353,10097,10154,10276,10371,22871,23189,23303,23499,23566,23603,25791,26037,51330,51393,55558,55604,57580,80005,85442,120892,150465	ACTN4,RHOA,ARHGDIA,C1QBP,CDH4,CFL1,CHN1,CRABP2,EFNA5,EPHA4,EPHB2,FN1,GBP1,HAS2,ITPKA,L1CAM,LIMS1,MAP1B,MELTF,NEDD4,NGF,PAK1,PLXNA2,ROBO2,S100A10,SDC2,CXCL12,SEMA3F,SPP1,THY1,TRPC6,VEGFA,WNT3,WNT5A,YWHAH,SEMA7A,CDK5R1,KALRN,SEMA5A,SLIT2,ACTR2,PLXNC1,NET1,SEMA3A,NLGN1,KANK1,KIF13B,MACF1,LPAR3,CORO1C,NGEF,SIPA1L1,TNFRSF12A,TRPV2,PLXNA3,CARMIL1,PREX1,DOCK5,KNDC1,LRRK2,TTL
9_Member	GO Biological Processes	GO:0010720	positive regulation of cell development	-8.89172	-7.059	93/451	27,387,396,596,650,708,1002,1072,1382,1745,1809,1855,1894,1902,1906,1946,2043,2048,2119,2146,2242,2281,2335,2534,2852,3037,3082,3232,3280,3398,3675,3706,3815,3897,3987,4131,4654,4681,4803,5058,5139,5176,5270,5468,5915,6092,6281,6387,6608,6770,6790,6857,6935,7225,7422,7424,7473,7474,7516,7852,7919,8111,8482,8507,8536,8997,9037,9353,9585,10097,10154,10276,10371,10636,22871,22943,23327,23499,23529,2…	ABL2,RHOA,ARHGDIA,BCL2,BMP2,C1QBP,CDH4,CFL1,CRABP2,DLX1,DPYSL3,DVL1,ECT2,LPAR1,EDN1,EFNA5,EPHA4,EPHB2,ETV5,EZH2,FES,FKBP1B,FN1,FYN,GPER1,HAS2,HGF,HOXD3,HES1,ID2,ITGA3,ITPKA,KIT,L1CAM,LIMS1,MAP1B,MYOD1,NBL1,NGF,PAK1,PDE3A,SERPINF1,SERPINE2,PPARG,RARB,ROBO2,S100A10,CXCL12,SMO,STAR,AURKA,SYT1,ZEB1,TRPC6,VEGFA,VEGFC,WNT3,WNT5A,XRCC2,CXCR4,DDX39B,GPR68,SEMA7A,ENC1,CAMK1,KALRN,SEMA5A,SLIT2,KIF20B,ACTR2…
9_Member	GO Biological Processes	GO:0050767	regulation of neurogenesis	-8.70796	-6.901	124/665	27,182,387,396,596,650,983,991,1000,1002,1072,1123,1382,1627,1745,1809,1855,1894,1902,1910,1946,2043,2048,2119,2146,2242,2281,2335,2534,2852,3082,3148,3232,3280,3398,3675,3706,3815,3897,3956,4131,4211,4681,4734,4771,4803,4908,5058,5176,5270,5362,5376,5468,5915,6092,6383,6387,6405,6422,6608,6696,6770,6857,6935,7015,7070,7225,7422,7424,7431,7473,7474,7516,7533,7852,8482,8507,8536,8851,8997,9037,918…	ABL2,JAG1,RHOA,ARHGDIA,BCL2,BMP2,CDK1,CDC20,CDH2,CDH4,CFL1,CHN1,CRABP2,DBN1,DLX1,DPYSL3,DVL1,ECT2,LPAR1,EDNRB,EFNA5,EPHA4,EPHB2,ETV5,EZH2,FES,FKBP1B,FN1,FYN,GPER1,HGF,HMGB2,HOXD3,HES1,ID2,ITGA3,ITPKA,KIT,L1CAM,LGALS1,MAP1B,MEIS1,NBL1,NEDD4,NF2,NGF,NTF3,PAK1,SERPINF1,SERPINE2,PLXNA2,PMP22,PPARG,RARB,ROBO2,SDC2,CXCL12,SEMA3F,SFRP1,SMO,SPP1,STAR,SYT1,ZEB1,TERT,THY1,TRPC6,VEGFA,VEGFC,VIM,WNT3,WNT5A,X…
9_Member	GO Biological Processes	GO:0051960	regulation of nervous system development	-7.81156	-6.093	88/752	27,182,650,983,1000,1002,1382,1745,1902,1910,1946,2043,2047,2119,2242,2281,2534,3082,3148,3232,3280,3675,3706,3815,4211,4681,5176,5270,5362,5376,5468,5915,6092,6383,6387,6405,6422,6608,6696,6770,6857,6935,7015,7225,7422,7424,7474,7852,8482,8507,8851,8997,9037,9241,9314,10154,10371,10636,10769,11221,22871,22943,23189,23303,23327,23499,23529,23566,26037,26050,27063,27286,51330,51393,51704,51804,545…	ABL2,JAG1,BMP2,CDK1,CDH2,CDH4,CRABP2,DLX1,LPAR1,EDNRB,EFNA5,EPHA4,EPHB1,ETV5,FES,FKBP1B,FYN,HGF,HMGB2,HOXD3,HES1,ITGA3,ITPKA,KIT,MEIS1,NBL1,SERPINF1,SERPINE2,PLXNA2,PMP22,PPARG,RARB,ROBO2,SDC2,CXCL12,SEMA3F,SFRP1,SMO,SPP1,STAR,SYT1,ZEB1,TERT,TRPC6,VEGFA,VEGFC,WNT5A,CXCR4,SEMA7A,ENC1,CDK5R1,KALRN,SEMA5A,NOG,KLF4,PLXNC1,SEMA3A,RGS14,PLK2,DUSP10,NLGN1,DKK1,KANK1,KIF13B,NEDD4L,MACF1,CLCF1,LPAR3,SIPA1…
9_Member	GO Biological Processes	GO:0010975	regulation of neuron projection development	-7.79898	-6.083	82/400	27,387,396,991,1002,1072,1123,1382,1627,1809,1855,1902,1946,2043,2048,2146,2242,2281,2335,2534,3082,3675,3706,3897,3956,4131,4734,4803,5058,5176,5362,5376,6092,6383,6387,6405,6422,6696,6857,7070,7225,7422,7431,7473,7474,7533,8482,8507,8536,8851,8997,9037,9314,9353,10097,10154,10371,10769,22871,23189,23303,23327,23413,23499,23566,25791,26037,27063,51330,51393,51704,54986,55558,55704,55714,57118,57…	ABL2,RHOA,ARHGDIA,CDC20,CDH4,CFL1,CHN1,CRABP2,DBN1,DPYSL3,DVL1,LPAR1,EFNA5,EPHA4,EPHB2,EZH2,FES,FKBP1B,FN1,FYN,HGF,ITGA3,ITPKA,L1CAM,LGALS1,MAP1B,NEDD4,NGF,PAK1,SERPINF1,PLXNA2,PMP22,ROBO2,SDC2,CXCL12,SEMA3F,SFRP1,SPP1,SYT1,THY1,TRPC6,VEGFA,VIM,WNT3,WNT5A,YWHAH,SEMA7A,ENC1,CAMK1,CDK5R1,KALRN,SEMA5A,KLF4,SLIT2,ACTR2,PLXNC1,SEMA3A,PLK2,NLGN1,KANK1,KIF13B,NEDD4L,NCS1,MACF1,LPAR3,NGEF,SIPA1L1,ANKRD1,…
9_Member	GO Biological Processes	GO:0031346	positive regulation of cell projection organization	-7.3163	-5.644	68/318	27,387,396,1002,1072,1382,1809,1855,1902,1946,2043,2146,2150,2242,2281,2335,2534,3082,3265,3673,3675,3706,3815,3897,4131,4803,5058,5176,5216,5880,5898,6092,6387,6857,7422,7473,7474,8482,8507,8536,8997,9037,9353,10097,10154,10435,10602,11135,22871,23327,23433,23499,23566,23603,27063,51330,51393,51704,55329,55604,55704,55714,55835,57118,57451,65009,80199,84298	ABL2,RHOA,ARHGDIA,CDH4,CFL1,CRABP2,DPYSL3,DVL1,LPAR1,EFNA5,EPHA4,EZH2,F2RL1,FES,FKBP1B,FN1,FYN,HGF,HRAS,ITGA2,ITGA3,ITPKA,KIT,L1CAM,MAP1B,NGF,PAK1,SERPINF1,PFN1,RAC2,RALA,ROBO2,CXCL12,SYT1,VEGFA,WNT3,WNT5A,SEMA7A,ENC1,CAMK1,KALRN,SEMA5A,SLIT2,ACTR2,PLXNC1,CDC42EP2,CDC42EP3,CDC42EP1,NLGN1,NEDD4L,RHOQ,MACF1,LPAR3,CORO1C,ANKRD1,TNFRSF12A,TRPV2,GPRC5B,MNS1,CARMIL1,CCDC88A,TENM3,CENPJ,CAMK1D,TENM2,NDR…
9_Member	GO Biological Processes	GO:0050769	positive regulation of neurogenesis	-7.20654	-5.548	79/392	27,387,396,596,650,1002,1072,1382,1745,1809,1855,1894,1902,1946,2043,2048,2119,2146,2242,2281,2335,2534,2852,3082,3232,3280,3398,3675,3706,3815,3897,4131,4681,4803,5058,5176,5270,5468,5915,6092,6387,6608,6770,6857,6935,7225,7422,7424,7473,7474,7516,7852,8482,8507,8536,8997,9037,9353,9585,10097,10154,10371,10636,22871,22943,23327,23499,23529,23566,26011,27063,51330,51393,51704,55714,57118,65009,84…	ABL2,RHOA,ARHGDIA,BCL2,BMP2,CDH4,CFL1,CRABP2,DLX1,DPYSL3,DVL1,ECT2,LPAR1,EFNA5,EPHA4,EPHB2,ETV5,EZH2,FES,FKBP1B,FN1,FYN,GPER1,HGF,HOXD3,HES1,ID2,ITGA3,ITPKA,KIT,L1CAM,MAP1B,NBL1,NGF,PAK1,SERPINF1,SERPINE2,PPARG,RARB,ROBO2,CXCL12,SMO,STAR,SYT1,ZEB1,TRPC6,VEGFA,VEGFC,WNT3,WNT5A,XRCC2,CXCR4,SEMA7A,ENC1,CAMK1,KALRN,SEMA5A,SLIT2,KIF20B,ACTR2,PLXNC1,SEMA3A,RGS14,NLGN1,DKK1,NEDD4L,MACF1,CLCF1,LPAR3,TENM…
9_Member	GO Biological Processes	GO:0051962	positive regulation of nervous system development	-6.87734	-5.252	87/453	27,387,396,596,650,991,1002,1072,1382,1745,1809,1855,1894,1902,1946,1950,2043,2047,2048,2119,2146,2242,2281,2335,2534,2852,3082,3232,3280,3398,3675,3706,3815,3897,4131,4681,4803,5021,5058,5176,5270,5468,5915,6092,6387,6608,6770,6857,6935,7058,7225,7422,7424,7473,7474,7516,7852,8482,8507,8536,8997,9037,9353,9585,10097,10154,10371,10636,22871,22943,23327,23499,23529,23566,26011,26050,27063,27286,51…	ABL2,RHOA,ARHGDIA,BCL2,BMP2,CDC20,CDH4,CFL1,CRABP2,DLX1,DPYSL3,DVL1,ECT2,LPAR1,EFNA5,EGF,EPHA4,EPHB1,EPHB2,ETV5,EZH2,FES,FKBP1B,FN1,FYN,GPER1,HGF,HOXD3,HES1,ID2,ITGA3,ITPKA,KIT,L1CAM,MAP1B,NBL1,NGF,OXTR,PAK1,SERPINF1,SERPINE2,PPARG,RARB,ROBO2,CXCL12,SMO,STAR,SYT1,ZEB1,THBS2,TRPC6,VEGFA,VEGFC,WNT3,WNT5A,XRCC2,CXCR4,SEMA7A,ENC1,CAMK1,KALRN,SEMA5A,SLIT2,KIF20B,ACTR2,PLXNC1,SEMA3A,RGS14,NLGN1,DKK1,NE…
9_Member	GO Biological Processes	GO:0045664	regulation of neuron differentiation	-6.54133	-4.949	66/545	27,182,650,1002,1382,1745,1902,1910,1946,2043,2119,2242,2281,2534,3082,3232,3280,3675,3706,4211,4681,5176,5362,5376,5915,6092,6383,6387,6405,6422,6696,6857,6935,7225,7422,7474,8482,8507,8851,8997,9037,9314,10154,10371,10769,22871,22943,23189,23303,23327,23499,23566,26037,27063,51330,51393,51704,54986,55558,55714,57118,57580,65009,85442,120892,259266	ABL2,JAG1,BMP2,CDH4,CRABP2,DLX1,LPAR1,EDNRB,EFNA5,EPHA4,ETV5,FES,FKBP1B,FYN,HGF,HOXD3,HES1,ITGA3,ITPKA,MEIS1,NBL1,SERPINF1,PLXNA2,PMP22,RARB,ROBO2,SDC2,CXCL12,SEMA3F,SFRP1,SPP1,SYT1,ZEB1,TRPC6,VEGFA,WNT5A,SEMA7A,ENC1,CDK5R1,KALRN,SEMA5A,KLF4,PLXNC1,SEMA3A,PLK2,NLGN1,DKK1,KANK1,KIF13B,NEDD4L,MACF1,LPAR3,SIPA1L1,ANKRD1,TNFRSF12A,TRPV2,GPRC5B,ULK4,PLXNA3,TENM3,CAMK1D,PREX1,NDRG4,KNDC1,LRRK2,ASPM
10_Summary	Hallmark Gene Sets	M5890	HALLMARK TNFA SIGNALING VIA NFKB	-26.5908	-23.544	100/200	19,182,329,330,388,467,595,650,687,694,1026,1051,1052,1435,1839,1843,1906,1958,1960,2114,2150,2152,2669,3164,3280,3371,3383,3398,3460,3491,3553,3575,3624,3914,3949,4084,4609,4783,4792,4814,4929,4973,5054,5142,5187,5209,5271,5328,5329,5606,5734,5791,5806,6303,6385,6446,6648,6776,6890,7050,7071,7127,7128,7422,7832,8013,8061,8303,8613,8660,8870,8877,8878,8942,9021,9120,9242,9308,9314,9516,9592,10365…	ABCA1,JAG1,BIRC2,BIRC3,RHOB,ATF3,CCND1,BMP2,KLF9,BTG1,CDKN1A,CEBPB,CEBPD,CSF1,HBEGF,DUSP1,EDN1,EGR1,EGR3,ETS2,F2RL1,F3,GEM,NR4A1,HES1,TNC,ICAM1,ID2,IFNGR2,CYR61,IL1B,IL7R,INHBA,LAMB3,LDLR,MXD1,MYC,NFIL3,NFKBIA,NINJ1,NR4A2,OLR1,SERPINE1,PDE4B,PER1,PFKFB3,SERPINB8,PLAU,PLAUR,MAP2K3,PTGER4,PTPRE,PTX3,SAT1,SDC4,SGK1,SOD2,STAT5A,TAP1,TGIF1,KLF10,TNFAIP2,TNFAIP3,VEGFA,BTG2,NR4A3,FOSL1,SNN,PLPP3,IRS2,IE…
10_Member	Hallmark Gene Sets	M5890	HALLMARK TNFA SIGNALING VIA NFKB	-26.5908	-23.544	100/200	19,182,329,330,388,467,595,650,687,694,1026,1051,1052,1435,1839,1843,1906,1958,1960,2114,2150,2152,2669,3164,3280,3371,3383,3398,3460,3491,3553,3575,3624,3914,3949,4084,4609,4783,4792,4814,4929,4973,5054,5142,5187,5209,5271,5328,5329,5606,5734,5791,5806,6303,6385,6446,6648,6776,6890,7050,7071,7127,7128,7422,7832,8013,8061,8303,8613,8660,8870,8877,8878,8942,9021,9120,9242,9308,9314,9516,9592,10365…	ABCA1,JAG1,BIRC2,BIRC3,RHOB,ATF3,CCND1,BMP2,KLF9,BTG1,CDKN1A,CEBPB,CEBPD,CSF1,HBEGF,DUSP1,EDN1,EGR1,EGR3,ETS2,F2RL1,F3,GEM,NR4A1,HES1,TNC,ICAM1,ID2,IFNGR2,CYR61,IL1B,IL7R,INHBA,LAMB3,LDLR,MXD1,MYC,NFIL3,NFKBIA,NINJ1,NR4A2,OLR1,SERPINE1,PDE4B,PER1,PFKFB3,SERPINB8,PLAU,PLAUR,MAP2K3,PTGER4,PTPRE,PTX3,SAT1,SDC4,SGK1,SOD2,STAT5A,TAP1,TGIF1,KLF10,TNFAIP2,TNFAIP3,VEGFA,BTG2,NR4A3,FOSL1,SNN,PLPP3,IRS2,IE…
11_Summary	GO Biological Processes	GO:0051270	regulation of cellular component movement	-24.4717	-21.451	248/784	25,27,81,87,94,100,101,104,182,284,287,306,328,347,348,387,388,397,583,585,596,623,650,652,683,708,727,857,1012,1021,1072,1081,1277,1281,1366,1435,1436,1634,1729,1809,1832,1839,1901,1902,1906,1950,1969,2064,2065,2113,2149,2150,2152,2159,2185,2192,2242,2246,2247,2252,2321,2335,2549,2852,3037,3082,3146,3162,3265,3315,3383,3486,3488,3491,3554,3570,3576,3643,3655,3673,3675,3676,3690,3717,3728,3791,38…	ABL1,ABL2,ACTN4,ACTN1,ACVRL1,ADA,ADAM8,ADARB1,JAG1,ANGPT1,ANK2,ANXA3,APEX1,APOD,APOE,RHOA,RHOB,ARHGDIB,BBS2,BBS4,BCL2,BDKRB1,BMP2,BMP4,BST1,C1QBP,C5,CAV1,CDH13,CDK6,CFL1,CGA,COL1A1,COL3A1,CLDN7,CSF1,CSF1R,DCN,DIAPH1,DPYSL3,DSP,HBEGF,S1PR1,LPAR1,EDN1,EGF,EPHA2,ERBB2,ERBB3,ETS1,F2R,F2RL1,F3,F10,PTK2B,FBLN1,FES,FGF1,FGF2,FGF7,FLT1,FN1,GAB1,GPER1,HAS2,HGF,HMGB1,HMOX1,HRAS,HSPB1,ICAM1,IGFBP3,IGFBP5,CY…
11_Member	GO Biological Processes	GO:0051270	regulation of cellular component movement	-24.4717	-21.451	248/784	25,27,81,87,94,100,101,104,182,284,287,306,328,347,348,387,388,397,583,585,596,623,650,652,683,708,727,857,1012,1021,1072,1081,1277,1281,1366,1435,1436,1634,1729,1809,1832,1839,1901,1902,1906,1950,1969,2064,2065,2113,2149,2150,2152,2159,2185,2192,2242,2246,2247,2252,2321,2335,2549,2852,3037,3082,3146,3162,3265,3315,3383,3486,3488,3491,3554,3570,3576,3643,3655,3673,3675,3676,3690,3717,3728,3791,38…	ABL1,ABL2,ACTN4,ACTN1,ACVRL1,ADA,ADAM8,ADARB1,JAG1,ANGPT1,ANK2,ANXA3,APEX1,APOD,APOE,RHOA,RHOB,ARHGDIB,BBS2,BBS4,BCL2,BDKRB1,BMP2,BMP4,BST1,C1QBP,C5,CAV1,CDH13,CDK6,CFL1,CGA,COL1A1,COL3A1,CLDN7,CSF1,CSF1R,DCN,DIAPH1,DPYSL3,DSP,HBEGF,S1PR1,LPAR1,EDN1,EGF,EPHA2,ERBB2,ERBB3,ETS1,F2R,F2RL1,F3,F10,PTK2B,FBLN1,FES,FGF1,FGF2,FGF7,FLT1,FN1,GAB1,GPER1,HAS2,HGF,HMGB1,HMOX1,HRAS,HSPB1,ICAM1,IGFBP3,IGFBP5,CY…
11_Member	GO Biological Processes	GO:0040012	regulation of locomotion	-23.9833	-20.988	246/781	25,27,81,94,100,101,104,182,284,306,328,347,348,387,388,397,583,585,596,623,650,652,683,708,727,858,1012,1021,1072,1081,1277,1281,1366,1435,1436,1634,1729,1809,1839,1901,1902,1906,1948,1950,1969,2064,2065,2113,2149,2150,2152,2159,2185,2192,2242,2246,2247,2252,2321,2335,2549,2852,3037,3082,3146,3162,3265,3315,3352,3383,3486,3488,3491,3554,3570,3576,3643,3655,3673,3675,3676,3690,3717,3791,3815,3910…	ABL1,ABL2,ACTN4,ACVRL1,ADA,ADAM8,ADARB1,JAG1,ANGPT1,ANXA3,APEX1,APOD,APOE,RHOA,RHOB,ARHGDIB,BBS2,BBS4,BCL2,BDKRB1,BMP2,BMP4,BST1,C1QBP,C5,CAV2,CDH13,CDK6,CFL1,CGA,COL1A1,COL3A1,CLDN7,CSF1,CSF1R,DCN,DIAPH1,DPYSL3,HBEGF,S1PR1,LPAR1,EDN1,EFNB2,EGF,EPHA2,ERBB2,ERBB3,ETS1,F2R,F2RL1,F3,F10,PTK2B,FBLN1,FES,FGF1,FGF2,FGF7,FLT1,FN1,GAB1,GPER1,HAS2,HGF,HMGB1,HMOX1,HRAS,HSPB1,HTR1D,ICAM1,IGFBP3,IGFBP5,CYR61…
11_Member	GO Biological Processes	GO:2000145	regulation of cell motility	-23.314	-20.411	229/716	25,27,81,94,100,101,104,182,284,306,328,347,348,387,388,397,583,585,596,623,650,652,683,708,727,1012,1021,1072,1081,1277,1281,1366,1435,1436,1634,1729,1809,1839,1901,1902,1906,1950,1969,2064,2065,2113,2149,2150,2152,2159,2185,2192,2242,2246,2247,2252,2321,2335,2549,2852,3037,3082,3146,3162,3265,3315,3383,3486,3488,3491,3554,3570,3576,3643,3655,3673,3675,3676,3690,3717,3791,3815,3910,3911,3912,391…	ABL1,ABL2,ACTN4,ACVRL1,ADA,ADAM8,ADARB1,JAG1,ANGPT1,ANXA3,APEX1,APOD,APOE,RHOA,RHOB,ARHGDIB,BBS2,BBS4,BCL2,BDKRB1,BMP2,BMP4,BST1,C1QBP,C5,CDH13,CDK6,CFL1,CGA,COL1A1,COL3A1,CLDN7,CSF1,CSF1R,DCN,DIAPH1,DPYSL3,HBEGF,S1PR1,LPAR1,EDN1,EGF,EPHA2,ERBB2,ERBB3,ETS1,F2R,F2RL1,F3,F10,PTK2B,FBLN1,FES,FGF1,FGF2,FGF7,FLT1,FN1,GAB1,GPER1,HAS2,HGF,HMGB1,HMOX1,HRAS,HSPB1,ICAM1,IGFBP3,IGFBP5,CYR61,IL1R1,IL6R,CXCL8…
11_Member	GO Biological Processes	GO:0030334	regulation of cell migration	-21.4074	-18.648	212/665	81,94,100,101,104,182,284,306,328,347,348,387,388,397,596,623,650,652,683,708,727,1012,1081,1277,1281,1435,1436,1634,1729,1809,1839,1901,1902,1906,1969,2113,2149,2150,2152,2159,2185,2246,2247,2252,2321,2335,2549,2852,3037,3082,3146,3162,3265,3315,3383,3486,3488,3491,3554,3570,3576,3643,3655,3673,3675,3676,3690,3717,3791,3815,3910,3911,3912,3918,4000,4163,4233,4254,4303,4319,4478,4681,4771,4856,49…	ACTN4,ACVRL1,ADA,ADAM8,ADARB1,JAG1,ANGPT1,ANXA3,APEX1,APOD,APOE,RHOA,RHOB,ARHGDIB,BCL2,BDKRB1,BMP2,BMP4,BST1,C1QBP,C5,CDH13,CGA,COL1A1,COL3A1,CSF1,CSF1R,DCN,DIAPH1,DPYSL3,HBEGF,S1PR1,LPAR1,EDN1,EPHA2,ETS1,F2R,F2RL1,F3,F10,PTK2B,FGF1,FGF2,FGF7,FLT1,FN1,GAB1,GPER1,HAS2,HGF,HMGB1,HMOX1,HRAS,HSPB1,ICAM1,IGFBP3,IGFBP5,CYR61,IL1R1,IL6R,CXCL8,INSR,ITGA6,ITGA2,ITGA3,ITGA4,ITGB3,JAK2,KDR,KIT,LAMA4,LAMA5,L…
11_Member	GO Biological Processes	GO:0051272	positive regulation of cellular component movement	-16.0628	-13.631	137/408	81,101,284,306,388,596,623,650,652,708,1012,1072,1081,1277,1366,1435,1436,1729,1839,1901,1902,1906,2113,2149,2150,2152,2159,2185,2246,2247,2252,2321,2335,2852,3037,3082,3146,3265,3315,3383,3491,3554,3570,3576,3643,3655,3673,3675,3676,3690,3717,3791,3815,3912,3918,3925,4233,4254,4303,4908,5054,5058,5154,5155,5156,5159,5216,5295,5328,5420,5880,5919,6387,6546,6591,6615,6776,7015,7042,7046,7291,7422,…	ACTN4,ADAM8,ANGPT1,ANXA3,RHOB,BCL2,BDKRB1,BMP2,BMP4,C1QBP,CDH13,CFL1,CGA,COL1A1,CLDN7,CSF1,CSF1R,DIAPH1,HBEGF,S1PR1,LPAR1,EDN1,ETS1,F2R,F2RL1,F3,F10,PTK2B,FGF1,FGF2,FGF7,FLT1,FN1,GPER1,HAS2,HGF,HMGB1,HRAS,HSPB1,ICAM1,CYR61,IL1R1,IL6R,CXCL8,INSR,ITGA6,ITGA2,ITGA3,ITGA4,ITGB3,JAK2,KDR,KIT,LAMB1,LAMC2,STMN1,MET,KITLG,FOXO4,NTF3,SERPINE1,PAK1,PDGFA,PDGFB,PDGFRA,PDGFRB,PFN1,PIK3R1,PLAU,PODXL,RAC2,RARR…
11_Member	GO Biological Processes	GO:2000147	positive regulation of cell motility	-15.4221	-13.046	133/398	81,101,284,306,388,596,623,650,652,708,1012,1072,1081,1277,1366,1435,1436,1729,1839,1901,1902,1906,2113,2149,2150,2152,2159,2185,2246,2247,2252,2321,2335,2852,3037,3082,3146,3265,3315,3383,3491,3554,3570,3576,3643,3655,3673,3675,3676,3690,3717,3791,3815,3912,3918,4233,4254,4303,4908,5054,5058,5154,5155,5156,5159,5216,5295,5328,5420,5880,5919,6387,6546,6591,6615,6776,7015,7042,7046,7291,7422,7424,…	ACTN4,ADAM8,ANGPT1,ANXA3,RHOB,BCL2,BDKRB1,BMP2,BMP4,C1QBP,CDH13,CFL1,CGA,COL1A1,CLDN7,CSF1,CSF1R,DIAPH1,HBEGF,S1PR1,LPAR1,EDN1,ETS1,F2R,F2RL1,F3,F10,PTK2B,FGF1,FGF2,FGF7,FLT1,FN1,GPER1,HAS2,HGF,HMGB1,HRAS,HSPB1,ICAM1,CYR61,IL1R1,IL6R,CXCL8,INSR,ITGA6,ITGA2,ITGA3,ITGA4,ITGB3,JAK2,KDR,KIT,LAMB1,LAMC2,MET,KITLG,FOXO4,NTF3,SERPINE1,PAK1,PDGFA,PDGFB,PDGFRA,PDGFRB,PFN1,PIK3R1,PLAU,PODXL,RAC2,RARRES2,CX…
11_Member	GO Biological Processes	GO:0030335	positive regulation of cell migration	-14.87	-12.554	128/383	81,101,284,306,388,596,623,650,652,708,1012,1081,1277,1435,1436,1729,1839,1901,1902,1906,2113,2149,2150,2152,2159,2185,2246,2247,2252,2321,2335,2852,3037,3082,3146,3265,3315,3383,3491,3554,3570,3576,3643,3655,3673,3675,3676,3690,3717,3791,3815,3912,3918,4233,4254,4303,4908,5054,5058,5154,5155,5156,5159,5216,5295,5328,5420,5880,5919,6387,6546,6591,6615,6776,7015,7042,7046,7422,7424,7474,8613,8660,…	ACTN4,ADAM8,ANGPT1,ANXA3,RHOB,BCL2,BDKRB1,BMP2,BMP4,C1QBP,CDH13,CGA,COL1A1,CSF1,CSF1R,DIAPH1,HBEGF,S1PR1,LPAR1,EDN1,ETS1,F2R,F2RL1,F3,F10,PTK2B,FGF1,FGF2,FGF7,FLT1,FN1,GPER1,HAS2,HGF,HMGB1,HRAS,HSPB1,ICAM1,CYR61,IL1R1,IL6R,CXCL8,INSR,ITGA6,ITGA2,ITGA3,ITGA4,ITGB3,JAK2,KDR,KIT,LAMB1,LAMC2,MET,KITLG,FOXO4,NTF3,SERPINE1,PAK1,PDGFA,PDGFB,PDGFRA,PDGFRB,PFN1,PIK3R1,PLAU,PODXL,RAC2,RARRES2,CXCL12,SLC8A1…
11_Member	GO Biological Processes	GO:0040017	positive regulation of locomotion	-14.8262	-12.515	138/425	81,101,284,306,388,596,623,650,652,708,858,1012,1072,1081,1277,1366,1435,1436,1729,1839,1901,1902,1906,2113,2149,2150,2152,2159,2185,2246,2247,2252,2321,2335,2852,3037,3082,3146,3265,3315,3383,3491,3554,3570,3576,3643,3655,3673,3675,3676,3690,3717,3791,3815,3912,3918,4233,4254,4303,4908,5054,5058,5091,5154,5155,5156,5159,5216,5295,5328,5420,5880,5919,6387,6546,6591,6615,6776,7015,7042,7046,7291,7…	ACTN4,ADAM8,ANGPT1,ANXA3,RHOB,BCL2,BDKRB1,BMP2,BMP4,C1QBP,CAV2,CDH13,CFL1,CGA,COL1A1,CLDN7,CSF1,CSF1R,DIAPH1,HBEGF,S1PR1,LPAR1,EDN1,ETS1,F2R,F2RL1,F3,F10,PTK2B,FGF1,FGF2,FGF7,FLT1,FN1,GPER1,HAS2,HGF,HMGB1,HRAS,HSPB1,ICAM1,CYR61,IL1R1,IL6R,CXCL8,INSR,ITGA6,ITGA2,ITGA3,ITGA4,ITGB3,JAK2,KDR,KIT,LAMB1,LAMC2,MET,KITLG,FOXO4,NTF3,SERPINE1,PAK1,PC,PDGFA,PDGFB,PDGFRA,PDGFRB,PFN1,PIK3R1,PLAU,PODXL,RAC2,RA…
11_Member	GO Biological Processes	GO:0001667	ameboidal-type cell migration	-13.9029	-11.669	108/311	94,284,306,348,387,388,397,652,708,1012,1634,1803,1839,1906,1910,1947,1948,1960,1969,2113,2185,2246,2247,2252,3037,3146,3164,3315,3357,3673,3675,3676,3688,3690,3791,3815,3911,4041,4163,4233,4254,4627,4856,5058,5155,5176,5216,5308,5467,5547,5646,5793,5797,6273,6385,6405,6546,6608,6776,6781,7042,7046,7145,7291,7422,7424,7474,7857,8692,8742,8828,9037,9314,9353,9464,9475,9688,9734,10371,10487,10512,1…	ACVRL1,ANGPT1,ANXA3,APOE,RHOA,RHOB,ARHGDIB,BMP4,C1QBP,CDH13,DCN,DPP4,HBEGF,EDN1,EDNRB,EFNB1,EFNB2,EGR3,EPHA2,ETS1,PTK2B,FGF1,FGF2,FGF7,HAS2,HMGB1,NR4A1,HSPB1,HTR2B,ITGA2,ITGA3,ITGA4,ITGB1,ITGB3,KDR,KIT,LAMA5,LRP5,MCC,MET,KITLG,MYH9,NOV,PAK1,PDGFB,SERPINF1,PFN1,PITX2,PPARD,PRCP,PRSS3,PTPRG,PTPRM,S100A2,SDC4,SEMA3F,SLC8A1,SMO,STAT5A,STC1,TGFB2,TGFBR1,TNS1,TWIST1,VEGFA,VEGFC,WNT5A,SCG2,HYAL2,TNFSF12…
11_Member	GO Biological Processes	GO:0010631	epithelial cell migration	-12.4507	-10.304	83/225	94,284,306,348,387,388,652,1012,1634,1803,1839,1906,1948,1960,1969,2113,2185,2246,2247,2252,3037,3146,3164,3315,3673,3675,3688,3690,3791,3815,4163,4233,4627,4856,5155,5176,5216,5467,5547,5646,5793,5797,6273,6776,6781,7042,7046,7422,7424,7474,7857,8742,8828,9037,9314,9353,9475,9688,9734,10371,10755,23328,23499,23511,23603,25960,27286,28984,29941,54443,54567,54828,55612,57449,80005,80149,83442,8491…	ACVRL1,ANGPT1,ANXA3,APOE,RHOA,RHOB,BMP4,CDH13,DCN,DPP4,HBEGF,EDN1,EFNB2,EGR3,EPHA2,ETS1,PTK2B,FGF1,FGF2,FGF7,HAS2,HMGB1,NR4A1,HSPB1,ITGA2,ITGA3,ITGB1,ITGB3,KDR,KIT,MCC,MET,MYH9,NOV,PDGFB,SERPINF1,PFN1,PPARD,PRCP,PRSS3,PTPRG,PTPRM,S100A2,STAT5A,STC1,TGFB2,TGFBR1,VEGFA,VEGFC,WNT5A,SCG2,TNFSF12,NRP2,SEMA5A,KLF4,SLIT2,ROCK2,NUP93,HDAC9,SEMA3A,GIPC1,SASH1,MACF1,NUP188,CORO1C,ADGRA2,SRPX2,RGCC,PKN3,ANL…
11_Member	GO Biological Processes	GO:0090130	tissue migration	-12.3045	-10.168	85/234	59,70,94,284,306,348,387,388,652,1012,1634,1803,1839,1906,1948,1960,1969,2113,2185,2246,2247,2252,3037,3146,3164,3315,3673,3675,3688,3690,3791,3815,4163,4233,4627,4856,5155,5176,5216,5467,5547,5646,5793,5797,6273,6776,6781,7042,7046,7422,7424,7474,7857,8742,8828,9037,9314,9353,9475,9688,9734,10371,10755,23328,23499,23511,23603,25960,27286,28984,29941,54443,54567,54828,55612,57449,80005,80149,8344…	ACTA2,ACTC1,ACVRL1,ANGPT1,ANXA3,APOE,RHOA,RHOB,BMP4,CDH13,DCN,DPP4,HBEGF,EDN1,EFNB2,EGR3,EPHA2,ETS1,PTK2B,FGF1,FGF2,FGF7,HAS2,HMGB1,NR4A1,HSPB1,ITGA2,ITGA3,ITGB1,ITGB3,KDR,KIT,MCC,MET,MYH9,NOV,PDGFB,SERPINF1,PFN1,PPARD,PRCP,PRSS3,PTPRG,PTPRM,S100A2,STAT5A,STC1,TGFB2,TGFBR1,VEGFA,VEGFC,WNT5A,SCG2,TNFSF12,NRP2,SEMA5A,KLF4,SLIT2,ROCK2,NUP93,HDAC9,SEMA3A,GIPC1,SASH1,MACF1,NUP188,CORO1C,ADGRA2,SRPX2,R…
11_Member	GO Biological Processes	GO:0090132	epithelium migration	-12.0905	-9.973	83/228	94,284,306,348,387,388,652,1012,1634,1803,1839,1906,1948,1960,1969,2113,2185,2246,2247,2252,3037,3146,3164,3315,3673,3675,3688,3690,3791,3815,4163,4233,4627,4856,5155,5176,5216,5467,5547,5646,5793,5797,6273,6776,6781,7042,7046,7422,7424,7474,7857,8742,8828,9037,9314,9353,9475,9688,9734,10371,10755,23328,23499,23511,23603,25960,27286,28984,29941,54443,54567,54828,55612,57449,80005,80149,83442,8491…	ACVRL1,ANGPT1,ANXA3,APOE,RHOA,RHOB,BMP4,CDH13,DCN,DPP4,HBEGF,EDN1,EFNB2,EGR3,EPHA2,ETS1,PTK2B,FGF1,FGF2,FGF7,HAS2,HMGB1,NR4A1,HSPB1,ITGA2,ITGA3,ITGB1,ITGB3,KDR,KIT,MCC,MET,MYH9,NOV,PDGFB,SERPINF1,PFN1,PPARD,PRCP,PRSS3,PTPRG,PTPRM,S100A2,STAT5A,STC1,TGFB2,TGFBR1,VEGFA,VEGFC,WNT5A,SCG2,TNFSF12,NRP2,SEMA5A,KLF4,SLIT2,ROCK2,NUP93,HDAC9,SEMA3A,GIPC1,SASH1,MACF1,NUP188,CORO1C,ADGRA2,SRPX2,RGCC,PKN3,ANL…
11_Member	GO Biological Processes	GO:0043542	endothelial cell migration	-12.048	-9.934	63/153	94,284,306,348,387,388,652,1012,1634,1803,1906,1948,1960,1969,2113,2185,2246,2247,3146,3164,3315,3688,3690,3791,4233,4627,4856,5155,5176,5547,5646,5797,6273,6776,6781,7046,7422,7424,7474,7857,8742,8828,9037,9314,9353,9475,9734,10755,23328,25960,27286,28984,54567,54828,57449,80149,83442,84913,90627,147372,153090,154796,154810	ACVRL1,ANGPT1,ANXA3,APOE,RHOA,RHOB,BMP4,CDH13,DCN,DPP4,EDN1,EFNB2,EGR3,EPHA2,ETS1,PTK2B,FGF1,FGF2,HMGB1,NR4A1,HSPB1,ITGB1,ITGB3,KDR,MET,MYH9,NOV,PDGFB,SERPINF1,PRCP,PRSS3,PTPRM,S100A2,STAT5A,STC1,TGFBR1,VEGFA,VEGFC,WNT5A,SCG2,TNFSF12,NRP2,SEMA5A,KLF4,SLIT2,ROCK2,HDAC9,GIPC1,SASH1,ADGRA2,SRPX2,RGCC,DLL4,BCAS3,PLEKHG5,ZC3H12A,SH3BGRL3,ATOH8,STARD13,CCBE1,DAB2IP,AMOT,AMOTL1
11_Member	GO Biological Processes	GO:0010594	regulation of endothelial cell migration	-9.75187	-7.847	48/114	94,284,306,348,387,388,652,1634,1906,1969,2113,2185,2246,2247,3146,3315,3690,3791,4233,5155,5176,5547,5797,6776,6781,7422,7424,7474,8613,8828,9037,9314,9353,9475,9734,23328,25960,27286,28984,54567,54828,80149,83442,84913,90627,147372,153090,154810	ACVRL1,ANGPT1,ANXA3,APOE,RHOA,RHOB,BMP4,DCN,EDN1,EPHA2,ETS1,PTK2B,FGF1,FGF2,HMGB1,HSPB1,ITGB3,KDR,MET,PDGFB,SERPINF1,PRCP,PTPRM,STAT5A,STC1,VEGFA,VEGFC,WNT5A,PLPP3,NRP2,SEMA5A,KLF4,SLIT2,ROCK2,HDAC9,SASH1,ADGRA2,SRPX2,RGCC,DLL4,BCAS3,ZC3H12A,SH3BGRL3,ATOH8,STARD13,CCBE1,DAB2IP,AMOTL1
11_Member	GO Biological Processes	GO:0010632	regulation of epithelial cell migration	-8.96988	-7.127	58/169	94,284,306,348,387,388,652,1634,1839,1906,1969,2113,2185,2246,2247,2252,3037,3146,3673,3675,3690,3791,4163,4233,5155,5176,5216,5547,5793,5797,6776,6781,7042,7422,7424,7474,8613,8828,9037,9314,9353,9734,10371,23328,23499,23603,27286,28984,54567,54828,80005,80149,83442,84913,90627,147372,153090,154810	ACVRL1,ANGPT1,ANXA3,APOE,RHOA,RHOB,BMP4,DCN,HBEGF,EDN1,EPHA2,ETS1,PTK2B,FGF1,FGF2,FGF7,HAS2,HMGB1,ITGA2,ITGA3,ITGB3,KDR,MCC,MET,PDGFB,SERPINF1,PFN1,PRCP,PTPRG,PTPRM,STAT5A,STC1,TGFB2,VEGFA,VEGFC,WNT5A,PLPP3,NRP2,SEMA5A,KLF4,SLIT2,HDAC9,SEMA3A,SASH1,MACF1,CORO1C,SRPX2,RGCC,DLL4,BCAS3,DOCK5,ZC3H12A,SH3BGRL3,ATOH8,STARD13,CCBE1,DAB2IP,AMOTL1
11_Member	GO Biological Processes	GO:0010595	positive regulation of endothelial cell migration	-7.69657	-5.99	31/67	284,306,388,652,1906,2113,2185,2246,2247,3315,3690,3791,4233,5155,6776,7422,7424,7474,8613,8828,9037,9475,9734,23328,25960,27286,54828,80149,84913,147372,154810	ANGPT1,ANXA3,RHOB,BMP4,EDN1,ETS1,PTK2B,FGF1,FGF2,HSPB1,ITGB3,KDR,MET,PDGFB,STAT5A,VEGFA,VEGFC,WNT5A,PLPP3,NRP2,SEMA5A,ROCK2,HDAC9,SASH1,ADGRA2,SRPX2,BCAS3,ZC3H12A,ATOH8,CCBE1,AMOTL1
11_Member	GO Biological Processes	GO:0010634	positive regulation of epithelial cell migration	-7.57934	-6.054	25/105	154810,7042,9734,3673,3675,5155,80005,5216,306,1839,2113,8828,27286,1906,3791,3690,147372,7422,7424,2247,2246,9037,4233,3037,7474	AMOTL1,TGFB2,HDAC9,ITGA2,ITGA3,PDGFB,DOCK5,PFN1,ANXA3,HBEGF,ETS1,NRP2,SRPX2,EDN1,KDR,ITGB3,CCBE1,VEGFA,VEGFC,FGF2,FGF1,SEMA5A,MET,HAS2,WNT5A
11_Member	GO Biological Processes	GO:0043534	blood vessel endothelial cell migration	-6.31443	-4.742	29/73	94,284,348,387,1948,1960,1969,2185,2247,3146,3164,3688,3791,4627,5155,5547,6776,7422,7424,9314,9353,9734,27286,28984,54567,83442,90627,154796,154810	ACVRL1,ANGPT1,APOE,RHOA,EFNB2,EGR3,EPHA2,PTK2B,FGF2,HMGB1,NR4A1,ITGB1,KDR,MYH9,PDGFB,PRCP,STAT5A,VEGFA,VEGFC,KLF4,SLIT2,HDAC9,SRPX2,RGCC,DLL4,SH3BGRL3,STARD13,AMOT,AMOTL1
11_Member	GO Biological Processes	GO:0043535	regulation of blood vessel endothelial cell migration	-3.83477	-2.517	15/51	94,284,348,1969,5155,5547,6776,7422,9314,9734,27286,28984,54567,90627,154810	ACVRL1,ANGPT1,APOE,EPHA2,PDGFB,PRCP,STAT5A,VEGFA,KLF4,HDAC9,SRPX2,RGCC,DLL4,STARD13,AMOTL1
12_Summary	GO Biological Processes	GO:1901701	cellular response to oxygen-containing compound	-23.3003	-20.411	281/942	19,25,27,109,112,328,388,408,493,535,558,610,639,641,672,677,687,706,824,837,842,857,858,890,891,948,983,990,1017,1021,1051,1072,1129,1191,1244,1277,1281,1290,1291,1307,1373,1471,1535,1604,1645,1663,1719,1728,1786,1788,1869,1894,1902,1906,1910,1946,1958,1978,2002,2030,2081,2113,2146,2185,2200,2281,2308,2534,2549,2730,2771,2776,2791,2852,3015,3082,3148,3156,3157,3164,3184,3297,3371,3383,3399,3481,…	ABCA1,ABL1,ABL2,ADCY3,ADCY6,APEX1,RHOB,ARRB1,ATP2B4,ATP6V0A1,AXL,HCN2,PRDM1,BLM,BRCA1,ZFP36L1,KLF9,TSPO,CAPN2,CASP4,CASP9,CAV1,CAV2,CCNA2,CCNB1,CD36,CDK1,CDC6,CDK2,CDK6,CEBPB,CFL1,CHRM2,CLU,ABCC2,COL1A1,COL3A1,COL5A2,COL6A1,COL16A1,CPS1,CST3,CYBA,CD55,AKR1C1,DDX11,DHFR,NQO1,DNMT1,DNMT3A,E2F1,ECT2,LPAR1,EDN1,EDNRB,EFNA5,EGR1,EIF4EBP1,ELK1,SLC29A1,ERN1,ETS1,EZH2,PTK2B,FBN1,FKBP1B,FOXO1,FYN,GAB1,GCL…
12_Member	GO Biological Processes	GO:1901701	cellular response to oxygen-containing compound	-23.3003	-20.411	281/942	19,25,27,109,112,328,388,408,493,535,558,610,639,641,672,677,687,706,824,837,842,857,858,890,891,948,983,990,1017,1021,1051,1072,1129,1191,1244,1277,1281,1290,1291,1307,1373,1471,1535,1604,1645,1663,1719,1728,1786,1788,1869,1894,1902,1906,1910,1946,1958,1978,2002,2030,2081,2113,2146,2185,2200,2281,2308,2534,2549,2730,2771,2776,2791,2852,3015,3082,3148,3156,3157,3164,3184,3297,3371,3383,3399,3481,…	ABCA1,ABL1,ABL2,ADCY3,ADCY6,APEX1,RHOB,ARRB1,ATP2B4,ATP6V0A1,AXL,HCN2,PRDM1,BLM,BRCA1,ZFP36L1,KLF9,TSPO,CAPN2,CASP4,CASP9,CAV1,CAV2,CCNA2,CCNB1,CD36,CDK1,CDC6,CDK2,CDK6,CEBPB,CFL1,CHRM2,CLU,ABCC2,COL1A1,COL3A1,COL5A2,COL6A1,COL16A1,CPS1,CST3,CYBA,CD55,AKR1C1,DDX11,DHFR,NQO1,DNMT1,DNMT3A,E2F1,ECT2,LPAR1,EDN1,EDNRB,EFNA5,EGR1,EIF4EBP1,ELK1,SLC29A1,ERN1,ETS1,EZH2,PTK2B,FBN1,FKBP1B,FOXO1,FYN,GAB1,GCL…
12_Member	GO Biological Processes	GO:1901698	response to nitrogen compound	-16.8752	-14.372	251/897	18,25,100,109,112,133,182,210,328,329,440,493,535,595,596,610,641,672,677,706,790,805,824,834,837,847,857,858,890,983,990,1017,1026,1051,1072,1129,1138,1244,1277,1281,1290,1291,1307,1373,1490,1535,1616,1663,1719,1723,1729,1786,1788,1843,1906,1958,1978,2146,2170,2185,2200,2308,2534,2549,2562,2697,2730,2771,2776,2791,2852,2946,2947,3033,3157,3162,3164,3176,3184,3251,3269,3297,3329,3351,3383,3434,34…	ABAT,ABL1,ADA,ADCY3,ADCY6,ADM,JAG1,ALAD,APEX1,BIRC2,ASNS,ATP2B4,ATP6V0A1,CCND1,BCL2,HCN2,BLM,BRCA1,ZFP36L1,TSPO,CAD,CALM2,CAPN2,CASP1,CASP4,CAT,CAV1,CAV2,CCNA2,CDK1,CDC6,CDK2,CDKN1A,CEBPB,CFL1,CHRM2,CHRNA5,ABCC2,COL1A1,COL3A1,COL5A2,COL6A1,COL16A1,CPS1,CTGF,CYBA,DAXX,DDX11,DHFR,DHODH,DIAPH1,DNMT1,DNMT3A,DUSP1,EDN1,EGR1,EIF4EBP1,EZH2,FABP3,PTK2B,FBN1,FOXO1,FYN,GAB1,GABRB3,GJA1,GCLM,GNAI2,GNAQ,GNG1…
12_Member	GO Biological Processes	GO:0010243	response to organonitrogen compound	-15.1841	-12.831	222/790	18,25,100,109,112,133,182,210,328,329,440,493,535,595,596,610,641,672,677,706,790,805,824,834,837,847,857,858,890,983,990,1026,1051,1072,1138,1244,1277,1281,1290,1291,1307,1373,1490,1535,1663,1719,1723,1729,1786,1788,1843,1906,1958,1978,2146,2170,2185,2200,2308,2534,2549,2562,2697,2730,2791,2852,2946,3033,3157,3162,3164,3176,3184,3251,3269,3297,3329,3351,3383,3481,3484,3488,3553,3625,3643,3667,36…	ABAT,ABL1,ADA,ADCY3,ADCY6,ADM,JAG1,ALAD,APEX1,BIRC2,ASNS,ATP2B4,ATP6V0A1,CCND1,BCL2,HCN2,BLM,BRCA1,ZFP36L1,TSPO,CAD,CALM2,CAPN2,CASP1,CASP4,CAT,CAV1,CAV2,CCNA2,CDK1,CDC6,CDKN1A,CEBPB,CFL1,CHRNA5,ABCC2,COL1A1,COL3A1,COL5A2,COL6A1,COL16A1,CPS1,CTGF,CYBA,DDX11,DHFR,DHODH,DIAPH1,DNMT1,DNMT3A,DUSP1,EDN1,EGR1,EIF4EBP1,EZH2,FABP3,PTK2B,FBN1,FOXO1,FYN,GAB1,GABRB3,GJA1,GCLM,GNG11,GPER1,GSTM2,HADH,HMGCS1,H…
12_Member	GO Biological Processes	GO:1901699	cellular response to nitrogen compound	-14.6036	-12.302	170/565	25,109,112,328,493,535,610,641,672,677,824,837,857,858,890,990,1017,1051,1072,1129,1277,1281,1290,1291,1307,1373,1535,1616,1663,1729,1786,1788,1906,1958,1978,2146,2200,2308,2534,2549,2562,2730,2771,2776,2791,2852,2946,3164,3184,3269,3297,3351,3383,3434,3481,3484,3488,3553,3625,3643,3667,3717,3728,3843,4217,4303,4314,4487,4644,4869,4929,5025,5058,5139,5142,5144,5164,5166,5167,5295,5447,5468,5577,5…	ABL1,ADCY3,ADCY6,APEX1,ATP2B4,ATP6V0A1,HCN2,BLM,BRCA1,ZFP36L1,CAPN2,CASP4,CAV1,CAV2,CCNA2,CDC6,CDK2,CEBPB,CFL1,CHRM2,COL1A1,COL3A1,COL5A2,COL6A1,COL16A1,CPS1,CYBA,DAXX,DDX11,DIAPH1,DNMT1,DNMT3A,EDN1,EGR1,EIF4EBP1,EZH2,FBN1,FOXO1,FYN,GAB1,GABRB3,GCLM,GNAI2,GNAQ,GNG11,GPER1,GSTM2,NR4A1,HNRNPD,HRH1,HSF1,HTR1B,ICAM1,IFIT1,IGF2,IGFBP1,IGFBP5,IL1B,INHBB,INSR,IRS1,JAK2,JUP,IPO5,MAP3K5,FOXO4,MMP3,MSX1,MY…
12_Member	GO Biological Processes	GO:0009725	response to hormone	-14.4733	-12.187	182/842	20,38,109,112,133,178,210,283,306,409,535,583,585,652,672,677,687,706,842,847,890,990,1026,1244,1373,1408,1490,1535,1616,1645,1655,1718,1843,1906,1946,1958,2170,2185,2200,2308,2534,2549,2629,2697,2730,2791,2908,3033,3148,3157,3164,3176,3297,3351,3383,3417,3481,3484,3488,3490,3553,3624,3625,3643,3667,3673,3675,3717,3727,3815,3953,4041,4129,4192,4303,4929,5066,5069,5106,5164,5166,5167,5176,5187,524…	ABCA2,ACAT1,ADCY3,ADCY6,ADM,AGL,ALAD,ANG,ANXA3,ARRB2,ATP6V0A1,BBS2,BBS4,BMP4,BRCA1,ZFP36L1,KLF9,TSPO,CASP9,CAT,CCNA2,CDC6,CDKN1A,ABCC2,CPS1,CRY2,CTGF,CYBA,DAXX,AKR1C1,DDX5,DHCR24,DUSP1,EDN1,EFNA5,EGR1,FABP3,PTK2B,FBN1,FOXO1,FYN,GAB1,GBA,GJA1,GCLM,GNG11,NR3C1,HADH,HMGB2,HMGCS1,NR4A1,HNMT,HSF1,HTR1B,ICAM1,IDH1,IGF2,IGFBP1,IGFBP5,IGFBP7,IL1B,INHBA,INHBB,INSR,IRS1,ITGA2,ITGA3,JAK2,JUND,KIT,LEPR,LRP5,…
12_Member	GO Biological Processes	GO:0071417	cellular response to organonitrogen compound	-13.4951	-11.274	148/483	25,109,112,328,493,535,610,641,672,677,824,837,857,858,890,990,1051,1072,1277,1281,1290,1291,1307,1373,1535,1663,1729,1786,1788,1906,1958,1978,2146,2200,2308,2534,2549,2562,2730,2791,2852,2946,3164,3184,3269,3297,3351,3383,3481,3484,3488,3553,3625,3643,3667,3717,3728,3843,4303,4487,4644,4929,5025,5058,5139,5142,5144,5164,5166,5167,5295,5447,5468,5577,5580,5591,5617,5618,5791,5829,5888,5919,6041,6…	ABL1,ADCY3,ADCY6,APEX1,ATP2B4,ATP6V0A1,HCN2,BLM,BRCA1,ZFP36L1,CAPN2,CASP4,CAV1,CAV2,CCNA2,CDC6,CEBPB,CFL1,COL1A1,COL3A1,COL5A2,COL6A1,COL16A1,CPS1,CYBA,DDX11,DIAPH1,DNMT1,DNMT3A,EDN1,EGR1,EIF4EBP1,EZH2,FBN1,FOXO1,FYN,GAB1,GABRB3,GCLM,GNG11,GPER1,GSTM2,NR4A1,HNRNPD,HRH1,HSF1,HTR1B,ICAM1,IGF2,IGFBP1,IGFBP5,IL1B,INHBB,INSR,IRS1,JAK2,JUP,IPO5,FOXO4,MSX1,MYO5A,NR4A2,P2RX4,PAK1,PDE3A,PDE4B,PDE4D,PDK2,P…
12_Member	GO Biological Processes	GO:0032870	cellular response to hormone stimulus	-10.1544	-8.228	131/614	109,112,409,535,583,585,652,672,677,687,842,890,990,1244,1373,1408,1535,1616,1645,1655,1843,1906,1946,2200,2308,2534,2549,2730,2791,2908,3157,3164,3297,3383,3481,3484,3490,3553,3624,3625,3643,3667,3717,3727,3815,3953,4303,4929,5164,5166,5167,5176,5187,5241,5295,5447,5465,5467,5468,5547,5577,5580,5617,5618,5732,5734,5737,5791,5915,5919,5972,6041,6092,6095,6096,6422,6502,6720,6750,6770,6774,6776,67…	ADCY3,ADCY6,ARRB2,ATP6V0A1,BBS2,BBS4,BMP4,BRCA1,ZFP36L1,KLF9,CASP9,CCNA2,CDC6,ABCC2,CPS1,CRY2,CYBA,DAXX,AKR1C1,DDX5,DUSP1,EDN1,EFNA5,FBN1,FOXO1,FYN,GAB1,GCLM,GNG11,NR3C1,HMGCS1,NR4A1,HSF1,ICAM1,IGF2,IGFBP1,IGFBP7,IL1B,INHBA,INHBB,INSR,IRS1,JAK2,JUND,KIT,LEPR,FOXO4,NR4A2,PDK2,PDK4,ENPP1,SERPINF1,PER1,PGR,PIK3R1,POR,PPARA,PPARD,PPARG,PRCP,PRKAR2B,PRKCD,PRL,PRLR,PTGER2,PTGER4,PTGFR,PTPRE,RARB,RARRES…
12_Member	GO Biological Processes	GO:1901652	response to peptide	-9.8528	-7.944	88/440	109,112,133,182,535,677,837,847,890,1373,1535,2170,2200,2308,2534,2549,2697,2791,3033,3164,3297,3383,3481,3484,3553,3643,3667,3717,3727,4041,4303,4792,4929,5164,5166,5167,5295,5447,5465,5468,5577,5580,5617,5791,5919,6041,6272,6387,6720,6770,6774,6776,6777,7128,7832,8013,8503,8651,8660,8836,8850,8992,9314,9882,10392,10580,10626,11031,22937,23175,23189,23235,23433,28999,29988,54206,54741,55022,5578…	ADCY3,ADCY6,ADM,JAG1,ATP6V0A1,ZFP36L1,CASP4,CAT,CCNA2,CPS1,CYBA,FABP3,FBN1,FOXO1,FYN,GAB1,GJA1,GNG11,HADH,NR4A1,HSF1,ICAM1,IGF2,IGFBP1,IL1B,INSR,IRS1,JAK2,JUND,LRP5,FOXO4,NFKBIA,NR4A2,PDK2,PDK4,ENPP1,PIK3R1,POR,PPARA,PPARG,PRKAR2B,PRKCD,PRL,PTPRE,RARRES2,RNASEL,SORT1,CXCL12,SREBF1,STAR,STAT3,STAT5A,STAT5B,TNFAIP3,BTG2,NR4A3,PIK3R3,SOCS1,IRS2,GGH,KAT2B,ATP6V0E1,KLF4,TBC1D4,NOD1,SORBS1,TRIM16,RAB31…
12_Member	GO Biological Processes	GO:0043434	response to peptide hormone	-8.91268	-7.078	79/395	109,112,133,535,677,847,890,1373,1535,2170,2200,2308,2534,2549,2697,2791,3033,3164,3297,3383,3481,3484,3553,3643,3667,3717,3727,4041,4303,4929,5164,5166,5167,5295,5447,5465,5468,5577,5580,5617,5791,5919,6041,6272,6387,6720,6770,6774,6776,6777,7832,8013,8503,8651,8660,8836,8850,8992,9882,10580,10626,11031,22937,23175,23189,23235,23433,29988,54206,54741,55022,55788,57085,59341,83667,83990,84709,255…	ADCY3,ADCY6,ADM,ATP6V0A1,ZFP36L1,CAT,CCNA2,CPS1,CYBA,FABP3,FBN1,FOXO1,FYN,GAB1,GJA1,GNG11,HADH,NR4A1,HSF1,ICAM1,IGF2,IGFBP1,IL1B,INSR,IRS1,JAK2,JUND,LRP5,FOXO4,NR4A2,PDK2,PDK4,ENPP1,PIK3R1,POR,PPARA,PPARG,PRKAR2B,PRKCD,PRL,PTPRE,RARRES2,RNASEL,SORT1,CXCL12,SREBF1,STAR,STAT3,STAT5A,STAT5B,BTG2,NR4A3,PIK3R3,SOCS1,IRS2,GGH,KAT2B,ATP6V0E1,TBC1D4,SORBS1,TRIM16,RAB31,SCAP,LPIN1,KANK1,SIK2,RHOQ,SLC2A8,E…
12_Member	GO Biological Processes	GO:1901653	cellular response to peptide	-8.17297	-6.42	65/312	109,112,535,677,837,890,1373,1535,2200,2308,2534,2549,2791,3164,3297,3481,3484,3553,3643,3667,3717,4303,4929,5164,5166,5167,5295,5447,5468,5577,5580,5617,5791,5919,6041,6720,6770,6774,6776,6777,8013,8503,8651,8660,8850,8992,9314,9882,10392,10580,11031,23175,23189,23235,23433,28999,29988,54206,54741,55022,55788,57085,83990,84709,255738	ADCY3,ADCY6,ATP6V0A1,ZFP36L1,CASP4,CCNA2,CPS1,CYBA,FBN1,FOXO1,FYN,GAB1,GNG11,NR4A1,HSF1,IGF2,IGFBP1,IL1B,INSR,IRS1,JAK2,FOXO4,NR4A2,PDK2,PDK4,ENPP1,PIK3R1,POR,PPARG,PRKAR2B,PRKCD,PRL,PTPRE,RARRES2,RNASEL,SREBF1,STAR,STAT3,STAT5A,STAT5B,NR4A3,PIK3R3,SOCS1,IRS2,KAT2B,ATP6V0E1,KLF4,TBC1D4,NOD1,SORBS1,RAB31,LPIN1,KANK1,SIK2,RHOQ,KLF15,SLC2A8,ERRFI1,LEPROT,PID1,LMBRD1,AGTRAP,BRIP1,MGARP,PCSK9
12_Member	GO Biological Processes	GO:0071375	cellular response to peptide hormone stimulus	-7.75889	-6.047	61/292	109,112,535,677,890,1373,1535,2200,2308,2534,2549,2791,3164,3297,3481,3484,3553,3643,3667,3717,4303,4929,5164,5166,5167,5295,5447,5468,5577,5580,5617,5791,5919,6041,6720,6770,6774,6776,6777,8013,8503,8651,8660,8850,8992,9882,10580,11031,23175,23189,23235,23433,29988,54206,54741,55022,55788,57085,83990,84709,255738	ADCY3,ADCY6,ATP6V0A1,ZFP36L1,CCNA2,CPS1,CYBA,FBN1,FOXO1,FYN,GAB1,GNG11,NR4A1,HSF1,IGF2,IGFBP1,IL1B,INSR,IRS1,JAK2,FOXO4,NR4A2,PDK2,PDK4,ENPP1,PIK3R1,POR,PPARG,PRKAR2B,PRKCD,PRL,PTPRE,RARRES2,RNASEL,SREBF1,STAR,STAT3,STAT5A,STAT5B,NR4A3,PIK3R3,SOCS1,IRS2,KAT2B,ATP6V0E1,TBC1D4,SORBS1,RAB31,LPIN1,KANK1,SIK2,RHOQ,SLC2A8,ERRFI1,LEPROT,PID1,LMBRD1,AGTRAP,BRIP1,MGARP,PCSK9
12_Member	GO Biological Processes	GO:0032868	response to insulin	-6.75686	-5.344	50/243	54206,255738,6770,83667,8850,2549,3643,2170,4303,10580,22937,3553,133,11031,23175,9882,55022,6720,8503,5295,59341,55788,6041,535,3481,3383,23433,677,2308,5167,5468,3484,5465,847,376497,3033,8651,29988,5580,23235,5919,3667,8660,8836,5791,5164,5166,23189,6272,8992	ERRFI1,PCSK9,STAR,SESN2,KAT2B,GAB1,INSR,FABP3,FOXO4,SORBS1,SCAP,IL1B,ADM,RAB31,LPIN1,TBC1D4,PID1,SREBF1,PIK3R3,PIK3R1,TRPV4,LMBRD1,RNASEL,ATP6V0A1,IGF2,ICAM1,RHOQ,ZFP36L1,FOXO1,ENPP1,PPARG,IGFBP1,PPARA,CAT,SLC27A1,HADH,SOCS1,SLC2A8,PRKCD,SIK2,RARRES2,IRS1,IRS2,GGH,PTPRE,PDK2,PDK4,KANK1,SORT1,ATP6V0E1
12_Member	GO Biological Processes	GO:0032869	cellular response to insulin stimulus	-5.35285	-4.133	38/190	54206,255738,6770,8850,2549,3643,4303,10580,3553,11031,23175,9882,6720,8503,5295,55788,6041,5166,3481,23433,677,2308,5167,5468,3484,8651,29988,5580,23235,5919,3667,8660,5791,5164,535,23189,55022,8992	ERRFI1,PCSK9,STAR,KAT2B,GAB1,INSR,FOXO4,SORBS1,IL1B,RAB31,LPIN1,TBC1D4,SREBF1,PIK3R3,PIK3R1,LMBRD1,RNASEL,PDK4,IGF2,RHOQ,ZFP36L1,FOXO1,ENPP1,PPARG,IGFBP1,SOCS1,SLC2A8,PRKCD,SIK2,RARRES2,IRS1,IRS2,PTPRE,PDK2,ATP6V0A1,KANK1,PID1,ATP6V0E1
13_Summary	Hallmark Gene Sets	M5891	HALLMARK HYPOXIA	-23.1782	-20.307	95/200	123,133,230,272,302,467,596,633,665,694,771,857,901,1026,1028,1490,1634,1837,1843,2023,2113,2152,2548,2597,2632,2745,2908,3073,3098,3099,3162,3484,3486,3491,3669,3939,4015,4214,4502,4601,4627,4783,5054,5066,5155,5163,5209,5214,5292,5329,5507,6095,6275,6383,6385,6513,6533,6781,7045,7052,7128,7360,7422,7428,7852,8406,8614,8660,8870,8991,9435,9469,9590,9672,10370,10397,10570,10891,10957,23327,23645,…	PLIN2,ADM,ALDOC,AMPD3,ANXA2,ATF3,BCL2,BGN,BNIP3L,BTG1,CA12,CAV1,CCNG2,CDKN1A,CDKN1C,CTGF,DCN,DTNA,DUSP1,ENO1,ETS1,F3,GAA,GAPDH,GBE1,GLRX,NR3C1,HEXA,HK1,HK2,HMOX1,IGFBP1,IGFBP3,CYR61,ISG20,LDHA,LOX,MAP3K1,MT2A,MXI1,MYH9,NFIL3,SERPINE1,PAM,PDGFB,PDK1,PFKFB3,PFKP,PIM1,PLAUR,PPP1R3C,RORA,S100A4,SDC2,SDC4,SLC2A1,SLC6A6,STC1,TGFBI,TGM2,TNFAIP3,UGP2,VEGFA,VHL,CXCR4,SRPX,STC2,IRS2,IER3,SELENBP1,CHST2,CHS…
13_Member	Hallmark Gene Sets	M5891	HALLMARK HYPOXIA	-23.1782	-20.307	95/200	123,133,230,272,302,467,596,633,665,694,771,857,901,1026,1028,1490,1634,1837,1843,2023,2113,2152,2548,2597,2632,2745,2908,3073,3098,3099,3162,3484,3486,3491,3669,3939,4015,4214,4502,4601,4627,4783,5054,5066,5155,5163,5209,5214,5292,5329,5507,6095,6275,6383,6385,6513,6533,6781,7045,7052,7128,7360,7422,7428,7852,8406,8614,8660,8870,8991,9435,9469,9590,9672,10370,10397,10570,10891,10957,23327,23645,…	PLIN2,ADM,ALDOC,AMPD3,ANXA2,ATF3,BCL2,BGN,BNIP3L,BTG1,CA12,CAV1,CCNG2,CDKN1A,CDKN1C,CTGF,DCN,DTNA,DUSP1,ENO1,ETS1,F3,GAA,GAPDH,GBE1,GLRX,NR3C1,HEXA,HK1,HK2,HMOX1,IGFBP1,IGFBP3,CYR61,ISG20,LDHA,LOX,MAP3K1,MT2A,MXI1,MYH9,NFIL3,SERPINE1,PAM,PDGFB,PDK1,PFKFB3,PFKP,PIM1,PLAUR,PPP1R3C,RORA,S100A4,SDC2,SDC4,SLC2A1,SLC6A6,STC1,TGFBI,TGM2,TNFAIP3,UGP2,VEGFA,VHL,CXCR4,SRPX,STC2,IRS2,IER3,SELENBP1,CHST2,CHS…
14_Summary	Hallmark Gene Sets	M5924	HALLMARK MTORC1 SIGNALING	-22.5218	-19.669	94/200	47,120,440,586,699,899,993,1026,1491,1595,1717,1718,1719,2023,2232,2539,2597,2632,2745,2936,3099,3156,3157,3251,3329,3417,3422,3488,3638,3939,3949,3992,4171,4173,4783,4860,5163,5347,5606,5641,6117,6184,6241,6309,6319,6503,6509,6513,6533,6713,6781,6790,7108,7277,7283,7296,7374,7832,7852,8140,8503,8624,8878,9415,9521,10096,10097,10212,10437,10452,10622,10682,10797,10962,10963,11151,11333,23165,2364…	ACLY,ADD3,ASNS,BCAT1,BUB1,CCNF,CDC25A,CDKN1A,CTH,CYP51A1,DHCR7,DHCR24,DHFR,ENO1,FDXR,G6PD,GAPDH,GBE1,GLRX,GSR,HK2,HMGCR,HMGCS1,HPRT1,HSPD1,IDH1,IDI1,IGFBP5,INSIG1,LDHA,LDLR,FADS1,MCM2,MCM4,NFIL3,PNP,PDK1,PLK1,MAP2K3,LGMN,RPA1,RPN1,RRM2,SC5D,SCD,SLA,SLC1A4,SLC2A1,SLC6A6,SQLE,STC1,AURKA,TM7SF2,TUBA4A,TUBG1,TXNRD1,UNG,BTG2,CXCR4,SLC7A5,PIK3R3,PSMG1,SQSTM1,FADS2,EEF1E1,ACTR3,ACTR2,DDX39A,IFI30,TOMM40…
14_Member	Hallmark Gene Sets	M5924	HALLMARK MTORC1 SIGNALING	-22.5218	-19.669	94/200	47,120,440,586,699,899,993,1026,1491,1595,1717,1718,1719,2023,2232,2539,2597,2632,2745,2936,3099,3156,3157,3251,3329,3417,3422,3488,3638,3939,3949,3992,4171,4173,4783,4860,5163,5347,5606,5641,6117,6184,6241,6309,6319,6503,6509,6513,6533,6713,6781,6790,7108,7277,7283,7296,7374,7832,7852,8140,8503,8624,8878,9415,9521,10096,10097,10212,10437,10452,10622,10682,10797,10962,10963,11151,11333,23165,2364…	ACLY,ADD3,ASNS,BCAT1,BUB1,CCNF,CDC25A,CDKN1A,CTH,CYP51A1,DHCR7,DHCR24,DHFR,ENO1,FDXR,G6PD,GAPDH,GBE1,GLRX,GSR,HK2,HMGCR,HMGCS1,HPRT1,HSPD1,IDH1,IDI1,IGFBP5,INSIG1,LDHA,LDLR,FADS1,MCM2,MCM4,NFIL3,PNP,PDK1,PLK1,MAP2K3,LGMN,RPA1,RPN1,RRM2,SC5D,SCD,SLA,SLC1A4,SLC2A1,SLC6A6,SQLE,STC1,AURKA,TM7SF2,TUBA4A,TUBG1,TXNRD1,UNG,BTG2,CXCR4,SLC7A5,PIK3R3,PSMG1,SQSTM1,FADS2,EEF1E1,ACTR3,ACTR2,DDX39A,IFI30,TOMM40…
15_Summary	Hallmark Gene Sets	M5913	HALLMARK INTERFERON GAMMA RESPONSE	-22.1516	-19.332	79/200	694,710,715,716,834,837,1026,1439,3075,3105,3106,3383,3429,3430,3431,3434,3437,3566,3600,3665,3669,3717,3959,4061,4502,4599,4792,4860,4939,4940,5142,5292,5359,5699,6398,6648,6737,6773,6774,6775,6890,6892,7127,7128,7378,8082,8651,8869,9021,9111,9246,9830,10379,10392,10410,10437,10561,10581,10616,10628,10791,10964,23424,25939,29126,51735,54625,55008,55601,57162,64135,64761,80830,81894,84159,84166,8…	BTG1,SERPING1,C1R,C1S,CASP1,CASP4,CDKN1A,CSF2RB,CFH,HLA-A,HLA-B,ICAM1,IFI27,IFI35,SP110,IFIT1,IFIT3,IL4R,IL15,IRF7,ISG20,JAK2,LGALS3BP,LY6E,MT2A,MX1,NFKBIA,PNP,OAS2,OAS3,PDE4B,PIM1,PLSCR1,PSMB10,SECTM1,SOD2,TRIM21,STAT2,STAT3,STAT4,TAP1,TAPBP,TNFAIP2,TNFAIP3,UPP1,SSPN,SOCS1,ST3GAL5,SOCS3,NMI,UBE2L6,TRIM14,IRF9,NOD1,IFITM3,IFI30,IFI44,IFITM2,RBCK1,TXNIP,VAMP5,IFI44L,TDRD7,SAMHD1,CD274,RAPGEF6,PARP…
15_Member	Hallmark Gene Sets	M5913	HALLMARK INTERFERON GAMMA RESPONSE	-22.1516	-19.332	79/200	694,710,715,716,834,837,1026,1439,3075,3105,3106,3383,3429,3430,3431,3434,3437,3566,3600,3665,3669,3717,3959,4061,4502,4599,4792,4860,4939,4940,5142,5292,5359,5699,6398,6648,6737,6773,6774,6775,6890,6892,7127,7128,7378,8082,8651,8869,9021,9111,9246,9830,10379,10392,10410,10437,10561,10581,10616,10628,10791,10964,23424,25939,29126,51735,54625,55008,55601,57162,64135,64761,80830,81894,84159,84166,8…	BTG1,SERPING1,C1R,C1S,CASP1,CASP4,CDKN1A,CSF2RB,CFH,HLA-A,HLA-B,ICAM1,IFI27,IFI35,SP110,IFIT1,IFIT3,IL4R,IL15,IRF7,ISG20,JAK2,LGALS3BP,LY6E,MT2A,MX1,NFKBIA,PNP,OAS2,OAS3,PDE4B,PIM1,PLSCR1,PSMB10,SECTM1,SOD2,TRIM21,STAT2,STAT3,STAT4,TAP1,TAPBP,TNFAIP2,TNFAIP3,UPP1,SSPN,SOCS1,ST3GAL5,SOCS3,NMI,UBE2L6,TRIM14,IRF9,NOD1,IFITM3,IFI30,IFI44,IFITM2,RBCK1,TXNIP,VAMP5,IFI44L,TDRD7,SAMHD1,CD274,RAPGEF6,PARP…
15_Member	Hallmark Gene Sets	M5911	HALLMARK INTERFERON ALPHA RESPONSE	-21.3611	-18.615	47/97	716,834,1267,1435,2634,3107,3429,3430,3431,3437,3600,3665,3669,3959,4061,4599,5359,6737,6773,6890,7318,8519,9111,9246,9830,10161,10379,10410,10437,10561,10581,10628,10964,23424,54625,55008,55281,55601,55603,64135,64761,81894,83666,85441,94240,115361,135112	C1S,CASP1,CNP,CSF1,GBP2,HLA-C,IFI27,IFI35,SP110,IFIT3,IL15,IRF7,ISG20,LGALS3BP,LY6E,MX1,PLSCR1,TRIM21,STAT2,TAP1,UBA7,IFITM1,NMI,UBE2L6,TRIM14,LPAR6,IRF9,IFITM3,IFI30,IFI44,IFITM2,TXNIP,IFI44L,TDRD7,PARP14,HERC6,TMEM140,DDX60,FAM46A,IFIH1,PARP12,SLC25A28,PARP9,HELZ2,EPSTI1,GBP4,NCOA7
16_Summary	GO Biological Processes	GO:0071897	DNA biosynthetic process	-21.8719	-19.083	68/204	94,409,580,641,672,675,1032,1063,1736,1763,3082,3178,3184,3320,3978,4361,4609,4751,5111,5154,5422,5424,5426,5427,5468,5558,5888,5932,5980,5983,5984,5985,6117,6119,6950,7083,7298,7318,7516,7517,7919,9100,9156,9212,9246,9314,9768,10576,10635,10714,10721,23649,27000,27063,51514,54433,54984,55135,63922,65057,79075,80010,80119,83990,116028,140609,201973,286826,60,86,328,890,1017,2067,2175,2177,2187,21…	ACVRL1,ARRB2,BARD1,BLM,BRCA1,BRCA2,CDKN2D,CENPF,DKC1,DNA2,HGF,HNRNPA1,HNRNPD,HSP90AA1,LIG1,MRE11,MYC,NEK2,PCNA,PDGFA,POLA1,POLD1,POLE,POLE2,PPARG,PRIM2,RAD51,RBBP8,REV3L,RFC3,RFC4,RFC5,RPA1,RPA3,TCP1,TK1,TYMS,UBA7,XRCC2,XRCC3,DDX39B,USP10,EXO1,AURKB,UBE2L6,KLF4,PCLAF,CCT2,RAD51AP1,POLD3,POLQ,POLA2,DNAJC2,ANKRD1,DTL,GAR1,PINX1,WRAP53,CHTF18,ACD,DSCC1,RMI1,PIF1,BRIP1,RMI2,NEK7,PRIMPOL,LIN9,ACTB,ACT…
16_Member	GO Biological Processes	GO:0071897	DNA biosynthetic process	-21.8719	-19.083	68/204	94,409,580,641,672,675,1032,1063,1736,1763,3082,3178,3184,3320,3978,4361,4609,4751,5111,5154,5422,5424,5426,5427,5468,5558,5888,5932,5980,5983,5984,5985,6117,6119,6950,7083,7298,7318,7516,7517,7919,9100,9156,9212,9246,9314,9768,10576,10635,10714,10721,23649,27000,27063,51514,54433,54984,55135,63922,65057,79075,80010,80119,83990,116028,140609,201973,286826	ACVRL1,ARRB2,BARD1,BLM,BRCA1,BRCA2,CDKN2D,CENPF,DKC1,DNA2,HGF,HNRNPA1,HNRNPD,HSP90AA1,LIG1,MRE11,MYC,NEK2,PCNA,PDGFA,POLA1,POLD1,POLE,POLE2,PPARG,PRIM2,RAD51,RBBP8,REV3L,RFC3,RFC4,RFC5,RPA1,RPA3,TCP1,TK1,TYMS,UBA7,XRCC2,XRCC3,DDX39B,USP10,EXO1,AURKB,UBE2L6,KLF4,PCLAF,CCT2,RAD51AP1,POLD3,POLQ,POLA2,DNAJC2,ANKRD1,DTL,GAR1,PINX1,WRAP53,CHTF18,ACD,DSCC1,RMI1,PIF1,BRIP1,RMI2,NEK7,PRIMPOL,LIN9
16_Member	Reactome Gene Sets	R-HSA-73894	DNA Repair	-20.4983	-18.086	68/319	60,86,328,580,641,672,675,890,1017,1763,2067,2175,2177,2187,2189,2237,2956,3014,3150,3978,4331,4361,4436,5111,5424,5426,5427,5591,5888,5932,5983,5984,5985,6117,6119,6996,7374,7398,7468,7516,7517,8533,8914,9100,9156,9557,9768,10038,10635,10714,10721,11073,29089,51514,54962,55183,55215,55775,56852,57697,63967,64858,80010,83990,84126,116028,146956,348654	ACTB,ACTL6A,APEX1,BARD1,BLM,BRCA1,BRCA2,CCNA2,CDK2,DNA2,ERCC1,FANCA,FANCD2,FANCB,FANCG,FEN1,MSH6,H2AFX,HMGN1,LIG1,MNAT1,MRE11,MSH2,PCNA,POLD1,POLE,POLE2,PRKDC,RAD51,RBBP8,RFC3,RFC4,RFC5,RPA1,RPA3,TDG,UNG,USP1,NSD2,XRCC2,XRCC3,COPS3,TIMELESS,USP10,EXO1,CHD1L,PCLAF,PARP2,RAD51AP1,POLD3,POLQ,TOPBP1,UBE2T,DTL,TIPIN,RIF1,FANCI,TDP1,RAD18,FANCM,CLSPN,DCLRE1B,RMI1,BRIP1,ATRIP,RMI2,EME1,GEN1
16_Member	GO Biological Processes	GO:0000731	DNA synthesis involved in DNA repair	-17.6872	-15.381	34/74	5111,5422,51514,5985,5984,5983,9246,5426,83990,7517,7516,80010,116028,1763,10635,9156,5424,10714,201973,672,675,1032,580,4361,641,7318,9100,5980,5932,6117,6119,5427,5888,9768	PCNA,POLA1,DTL,RFC5,RFC4,RFC3,UBE2L6,POLE,BRIP1,XRCC3,XRCC2,RMI1,RMI2,DNA2,RAD51AP1,EXO1,POLD1,POLD3,PRIMPOL,BRCA1,BRCA2,CDKN2D,BARD1,MRE11,BLM,UBA7,USP10,REV3L,RBBP8,RPA1,RPA3,POLE2,RAD51,PCLAF
16_Member	Reactome Gene Sets	R-HSA-5693579	Homologous DNA Pairing and Strand Exchange	-15.8014	-13.576	22/43	580,641,672,675,1763,4361,5888,5932,5983,5984,5985,6117,6119,7516,7517,9156,10635,11073,80010,83990,84126,116028	BARD1,BLM,BRCA1,BRCA2,DNA2,MRE11,RAD51,RBBP8,RFC3,RFC4,RFC5,RPA1,RPA3,XRCC2,XRCC3,EXO1,RAD51AP1,TOPBP1,RMI1,BRIP1,ATRIP,RMI2
16_Member	GO Biological Processes	GO:0072331	signal transduction by p53 class mediator	-14.1088	-12.001	61/258	5111,5366,5985,5984,4436,10769,5983,666,2305,6880,57646,83990,80010,116028,22974,1763,27063,83596,9156,54541,6749,57060,8851,6790,9212,9891,4487,672,7023,675,5565,55835,580,995,4361,27330,641,5931,9100,624,11198,29108,6591,11073,4869,144455,891,5932,1870,1869,51512,6117,6119,983,1017,8445,51422,84126,10848,9521,7027	PCNA,PMAIP1,RFC5,RFC4,MSH2,PLK2,RFC3,BOK,FOXM1,TAF9,USP28,BRIP1,RMI1,RMI2,TPX2,DNA2,ANKRD1,BCL2L12,EXO1,DDIT4,SSRP1,PCBP4,CDK5R1,AURKA,AURKB,NUAK1,MSX1,BRCA1,TFAP4,BRCA2,PRKAB2,CENPJ,BARD1,CDC25C,MRE11,RPS6KA6,BLM,RBBP7,USP10,BDKRB2,SUPT16H,PYCARD,SNAI2,TOPBP1,NPM1,E2F7,CCNB1,RBBP8,E2F2,E2F1,GTSE1,RPA1,RPA3,CDK1,CDK2,DYRK2,PRKAG2,ATRIP,PPP1R13L,EEF1E1,TFDP1
16_Member	GO Biological Processes	GO:0000732	strand displacement	-11.9814	-10.023	15/26	672,675,580,4361,9156,641,10635,1763,5932,5888,83990,7517,7516,80010,116028	BRCA1,BRCA2,BARD1,MRE11,EXO1,BLM,RAD51AP1,DNA2,RBBP8,RAD51,BRIP1,XRCC3,XRCC2,RMI1,RMI2
16_Member	Reactome Gene Sets	R-HSA-5693568	Resolution of D-loop Structures through Holliday Junction Intermediates	-11.8686	-9.914	17/35	672,675,580,4361,9156,348654,641,10635,1763,5932,5888,83990,7517,7516,146956,80010,116028	BRCA1,BRCA2,BARD1,MRE11,EXO1,GEN1,BLM,RAD51AP1,DNA2,RBBP8,RAD51,BRIP1,XRCC3,XRCC2,EME1,RMI1,RMI2
16_Member	Reactome Gene Sets	R-HSA-6804756	Regulation of TP53 Activity through Phosphorylation	-11.8607	-9.909	30/93	5985,5984,51422,5983,8445,6880,83990,80010,116028,22974,1763,890,84126,9156,6749,8851,6790,9212,9891,672,5565,580,11198,4361,641,5932,11073,6117,6119,1017	RFC5,RFC4,PRKAG2,RFC3,DYRK2,TAF9,BRIP1,RMI1,RMI2,TPX2,DNA2,CCNA2,ATRIP,EXO1,SSRP1,CDK5R1,AURKA,AURKB,NUAK1,BRCA1,PRKAB2,BARD1,SUPT16H,MRE11,BLM,RBBP8,TOPBP1,RPA1,RPA3,CDK2
16_Member	Reactome Gene Sets	R-HSA-5693554	Resolution of D-loop Structures through Synthesis-Dependent Strand Annealing (SDSA)	-11.6531	-9.712	15/27	672,675,580,4361,9156,641,10635,1763,5932,5888,83990,7517,7516,80010,116028	BRCA1,BRCA2,BARD1,MRE11,EXO1,BLM,RAD51AP1,DNA2,RBBP8,RAD51,BRIP1,XRCC3,XRCC2,RMI1,RMI2
16_Member	Reactome Gene Sets	R-HSA-5693537	Resolution of D-Loop Structures	-11.615	-9.682	17/36	672,675,580,4361,9156,348654,641,10635,1763,5932,5888,83990,7517,7516,146956,80010,116028	BRCA1,BRCA2,BARD1,MRE11,EXO1,GEN1,BLM,RAD51AP1,DNA2,RBBP8,RAD51,BRIP1,XRCC3,XRCC2,EME1,RMI1,RMI2
16_Member	KEGG Pathway	ko03460	Fanconi anemia pathway	-10.9673	-9.102	20/55	641,672,675,2067,2175,2177,2187,2189,5888,6117,6119,7398,29089,55215,57697,80010,83990,84126,116028,146956	BLM,BRCA1,BRCA2,ERCC1,FANCA,FANCD2,FANCB,FANCG,RAD51,RPA1,RPA3,USP1,UBE2T,FANCI,FANCM,RMI1,BRIP1,ATRIP,RMI2,EME1
16_Member	Reactome Gene Sets	R-HSA-69473	G2/M DNA damage checkpoint	-9.90081	-8.126	25/96	580,641,672,891,983,995,1763,3014,4361,5932,5983,5984,5985,6117,6119,7468,7533,7534,9156,10971,11073,80010,83990,84126,116028	BARD1,BLM,BRCA1,CCNB1,CDK1,CDC25C,DNA2,H2AFX,MRE11,RBBP8,RFC3,RFC4,RFC5,RPA1,RPA3,NSD2,YWHAH,YWHAZ,EXO1,YWHAQ,TOPBP1,RMI1,BRIP1,ATRIP,RMI2
16_Member	Reactome Gene Sets	R-HSA-5633007	Regulation of TP53 Activity	-9.72476	-7.971	38/162	6749,5984,51422,5983,8445,6880,83990,54815,80010,116028,22974,1763,890,84126,9156,5985,8851,6790,9212,9891,5305,672,1029,5565,580,11198,4361,641,5931,5932,6446,11073,6117,6119,983,1017,10000,10848	SSRP1,RFC4,PRKAG2,RFC3,DYRK2,TAF9,BRIP1,GATAD2A,RMI1,RMI2,TPX2,DNA2,CCNA2,ATRIP,EXO1,RFC5,CDK5R1,AURKA,AURKB,NUAK1,PIP4K2A,BRCA1,CDKN2A,PRKAB2,BARD1,SUPT16H,MRE11,BLM,RBBP7,RBBP8,SGK1,TOPBP1,RPA1,RPA3,CDK1,CDK2,AKT3,PPP1R13L
16_Member	GO Biological Processes	GO:1901796	regulation of signal transduction by p53 class mediator	-8.41432	-6.798	38/163	5366,5985,5984,51422,5983,8445,6880,83990,80010,116028,22974,1763,27063,83596,9156,6749,8851,6790,9212,9891,4487,672,5565,580,11198,4361,641,5931,624,6591,5932,11073,6117,6119,1017,84126,10848,9521	PMAIP1,RFC5,RFC4,PRKAG2,RFC3,DYRK2,TAF9,BRIP1,RMI1,RMI2,TPX2,DNA2,ANKRD1,BCL2L12,EXO1,SSRP1,CDK5R1,AURKA,AURKB,NUAK1,MSX1,BRCA1,PRKAB2,BARD1,SUPT16H,MRE11,BLM,RBBP7,BDKRB2,SNAI2,RBBP8,TOPBP1,RPA1,RPA3,CDK2,ATRIP,PPP1R13L,EEF1E1
16_Member	GO Biological Processes	GO:0000729	DNA double-strand break processing	-3.51351	-2.599	45474	672,1763,580,4361,641,5932,83990	BRCA1,DNA2,BARD1,MRE11,BLM,RBBP8,BRIP1
17_Summary	GO Biological Processes	GO:0008610	lipid biosynthetic process	-20.26	-17.528	166/654	39,47,133,220,221,224,283,341,348,650,672,706,1120,1593,1595,1717,1718,1906,1958,2055,2170,2194,2224,2232,2246,2252,2254,2539,2549,2583,2629,2710,3156,3157,3290,3294,3357,3417,3422,3490,3491,3553,3638,3667,3949,3992,4047,4597,4598,5087,5154,5155,5166,5191,5287,5295,5305,5329,5337,5359,5447,5467,5565,5580,5618,5730,5742,5783,5833,5947,6307,6309,6319,6591,6610,6615,6713,6720,6770,7108,7421,8398,850…	ACAT2,ACLY,ADM,ALDH1A3,ALDH3B1,ALDH3A2,ANG,APOC1,APOE,BMP2,BRCA1,TSPO,CHKB,CYP27A1,CYP51A1,DHCR7,DHCR24,EDN1,EGR1,CLN8,FABP3,FASN,FDPS,FDXR,FGF1,FGF7,FGF9,G6PD,GAB1,B4GALNT1,GBA,GK,HMGCR,HMGCS1,HSD11B1,HSD17B2,HTR2B,IDH1,IDI1,IGFBP7,CYR61,IL1B,INSIG1,IRS1,LDLR,FADS1,LSS,MVD,MVK,PBX1,PDGFA,PDGFB,PDK4,PEX7,PIK3C2B,PIK3R1,PIP4K2A,PLAUR,PLD1,PLSCR1,POR,PPARD,PRKAB2,PRKCD,PRLR,PTGDS,PTGS1,PTPN13,PCYT2…
17_Member	GO Biological Processes	GO:0008610	lipid biosynthetic process	-20.26	-17.528	166/654	39,47,133,220,221,224,283,341,348,650,672,706,1120,1593,1595,1717,1718,1906,1958,2055,2170,2194,2224,2232,2246,2252,2254,2539,2549,2583,2629,2710,3156,3157,3290,3294,3357,3417,3422,3490,3491,3553,3638,3667,3949,3992,4047,4597,4598,5087,5154,5155,5166,5191,5287,5295,5305,5329,5337,5359,5447,5467,5565,5580,5618,5730,5742,5783,5833,5947,6307,6309,6319,6591,6610,6615,6713,6720,6770,7108,7421,8398,850…	ACAT2,ACLY,ADM,ALDH1A3,ALDH3B1,ALDH3A2,ANG,APOC1,APOE,BMP2,BRCA1,TSPO,CHKB,CYP27A1,CYP51A1,DHCR7,DHCR24,EDN1,EGR1,CLN8,FABP3,FASN,FDPS,FDXR,FGF1,FGF7,FGF9,G6PD,GAB1,B4GALNT1,GBA,GK,HMGCR,HMGCS1,HSD11B1,HSD17B2,HTR2B,IDH1,IDI1,IGFBP7,CYR61,IL1B,INSIG1,IRS1,LDLR,FADS1,LSS,MVD,MVK,PBX1,PDGFA,PDGFB,PDK4,PEX7,PIK3C2B,PIK3R1,PIP4K2A,PLAUR,PLD1,PLSCR1,POR,PPARD,PRKAB2,PRKCD,PRLR,PTGDS,PTGS1,PTPN13,PCYT2…
17_Member	Reactome Gene Sets	R-HSA-556833	Metabolism of lipids and lipoproteins	-17.4919	-14.904	161/807	19,35,38,39,47,123,221,224,341,348,410,412,414,415,427,948,1081,1120,1593,1595,1622,1632,1645,1717,1718,1962,2170,2194,2224,2232,2534,2581,2583,2629,2678,2710,2720,2760,2879,3033,3073,3156,3157,3290,3417,3422,3638,3949,3992,4047,4597,4598,4758,4862,5287,5295,5305,5337,5360,5445,5465,5468,5476,5500,5538,5565,5660,5730,5742,5783,5833,6095,6307,6309,6319,6610,6713,6720,6721,6770,6907,7108,7296,8398,…	ABCA1,ACADS,ACAT1,ACAT2,ACLY,PLIN2,ALDH3B1,ALDH3A2,APOC1,APOE,ARSA,STS,ARSD,ARSE,ASAH1,CD36,CGA,CHKB,CYP27A1,CYP51A1,DBI,ECI1,AKR1C1,DHCR7,DHCR24,EHHADH,FABP3,FASN,FDPS,FDXR,FYN,GALC,B4GALNT1,GBA,GGT1,GK,GLB1,GM2A,GPX4,HADH,HEXA,HMGCR,HMGCS1,HSD11B1,IDH1,IDI1,INSIG1,LDLR,FADS1,LSS,MVD,MVK,NEU1,NPAS2,PIK3C2B,PIK3R1,PIP4K2A,PLD1,PLTP,PON2,PPARA,PPARG,CTSA,PPP1CB,PPT1,PRKAB2,PSAP,PTGDS,PTGS1,PTPN13,…
17_Member	GO Biological Processes	GO:0006644	phospholipid metabolic process	-10.4895	-8.526	91/449	341,1120,1201,1622,2055,2064,2065,2170,2185,2224,2252,2254,2321,2534,2549,2879,3082,3357,3417,3422,3613,3667,3949,3992,4254,4597,4598,5154,5156,5159,5287,5295,5305,5337,5359,5580,5783,5833,6610,8398,8503,8526,8611,8613,8660,8760,9314,9600,10162,10423,10554,10555,10924,23175,23446,23761,26090,26751,27132,27315,51227,51477,54344,54872,55326,55650,57515,63874,64748,64900,65258,79143,79644,80235,8451…	APOC1,CHKB,CLN3,DBI,CLN8,ERBB2,ERBB3,FABP3,PTK2B,FDPS,FGF7,FGF9,FLT1,FYN,GAB1,GPX4,HGF,HTR2B,IDH1,IDI1,IMPA2,IRS1,LDLR,FADS1,KITLG,MVD,MVK,PDGFA,PDGFRA,PDGFRB,PIK3C2B,PIK3R1,PIP4K2A,PLD1,PLSCR1,PRKCD,PTPN13,PCYT2,SMPD2,PLA2G6,PIK3R3,DGKE,PLPP1,PLPP3,IRS2,CDS2,KLF4,PITPNM1,LPCAT3,CDIPT,AGPAT1,AGPAT2,SMPDL3A,LPIN1,SLC44A1,PISD,ABHD12,SH3YL1,CPNE7,PGAP2,PIGP,ISYNA1,DPM3,PIGG,AGPAT5,PIGV,SERINC1,ABHD…
17_Member	GO Biological Processes	GO:0008654	phospholipid biosynthetic process	-7.28715	-5.619	57/273	1120,2170,2224,2252,2254,2549,3357,3417,3422,3667,3992,4597,4598,5154,5287,5295,5305,5337,5359,5783,5833,8398,8503,8526,8660,8760,9600,10162,10423,10554,10555,23175,23446,23761,26751,27132,27315,51227,51477,54344,54872,55326,55650,57515,64900,65258,79143,79644,80235,84803,93210,94005,129642,154141,254531,259230,376497	CHKB,FABP3,FDPS,FGF7,FGF9,GAB1,HTR2B,IDH1,IDI1,IRS1,FADS1,MVD,MVK,PDGFA,PIK3C2B,PIK3R1,PIP4K2A,PLD1,PLSCR1,PTPN13,PCYT2,PLA2G6,PIK3R3,DGKE,IRS2,CDS2,PITPNM1,LPCAT3,CDIPT,AGPAT1,AGPAT2,LPIN1,SLC44A1,PISD,SH3YL1,CPNE7,PGAP2,PIGP,ISYNA1,DPM3,PIGG,AGPAT5,PIGV,SERINC1,LPIN3,MPPE1,MBOAT7,SRD5A3,PIGZ,GPAT3,PGAP3,PIGS,MBOAT2,MBOAT1,LPCAT4,SGMS1,SLC27A1
17_Member	GO Biological Processes	GO:0090407	organophosphate biosynthetic process	-6.94603	-5.312	105/633	19,38,100,109,112,133,348,535,1120,1373,1902,1909,2170,2185,2224,2252,2254,2539,2549,2710,2771,2774,3351,3357,3417,3422,3667,3992,4597,4598,4832,4837,4882,4883,5154,5287,5295,5305,5337,5359,5783,5833,5836,6470,6774,7083,7298,7466,8398,8503,8526,8660,8760,8942,9472,9590,9600,10162,10203,10267,10423,10486,10554,10555,23057,23175,23446,23475,23761,26751,27132,27315,50484,51227,51422,51477,54344,5487…	ABCA1,ACAT1,ADA,ADCY3,ADCY6,ADM,APOE,ATP6V0A1,CHKB,CPS1,LPAR1,EDNRA,FABP3,PTK2B,FDPS,FGF7,FGF9,G6PD,GAB1,GK,GNAI2,GNAL,HTR1B,HTR2B,IDH1,IDI1,IRS1,FADS1,MVD,MVK,NME3,NNMT,NPR2,NPR3,PDGFA,PIK3C2B,PIK3R1,PIP4K2A,PLD1,PLSCR1,PTPN13,PCYT2,PYGL,SHMT1,STAT3,TK1,TYMS,WFS1,PLA2G6,PIK3R3,DGKE,IRS2,CDS2,KYNU,AKAP6,AKAP12,PITPNM1,LPCAT3,CALCRL,RAMP1,CDIPT,CAP2,AGPAT1,AGPAT2,NMNAT2,LPIN1,SLC44A1,QPRT,PISD,SH3…
17_Member	GO Biological Processes	GO:0046486	glycerolipid metabolic process	-5.95093	-4.637	75/431	5159,5156,27315,55650,23446,27132,84812,57515,26751,847,2252,154141,255738,79143,2170,341,80235,1120,10423,80339,5154,348,150094,64900,23175,1622,376497,2534,26090,8398,57104,254531,8503,10162,5295,3357,65258,54344,10062,2064,2065,54872,84803,5833,347735,51227,5287,3613,94005,2254,3638,3082,93210,4254,2549,2710,63874,114884,129642,283,5337,5359,5783,5305,8760,3949,3667,8660,55326,6720,9600,10555,…	PDGFRB,PDGFRA,PGAP2,PIGV,SLC44A1,CPNE7,PLCD4,SERINC1,SH3YL1,CAT,FGF7,MBOAT1,PCSK9,MBOAT7,FABP3,APOC1,PIGZ,CHKB,CDIPT,PNPLA3,PDGFA,APOE,SIK1,LPIN3,LPIN1,DBI,SLC27A1,FYN,ABHD12,PLA2G6,PNPLA2,LPCAT4,PIK3R3,LPCAT3,PIK3R1,HTR2B,MPPE1,DPM3,NR1H3,ERBB2,ERBB3,PIGG,GPAT3,PCYT2,SERINC2,PIGP,PIK3C2B,IMPA2,PIGS,FGF9,INSIG1,HGF,PGAP3,KITLG,GAB1,GK,ABHD4,OSBPL10,MBOAT2,ANG,PLD1,PLSCR1,PTPN13,PIP4K2A,CDS2,LDLR,…
17_Member	GO Biological Processes	GO:0006650	glycerophospholipid metabolic process	-5.84072	-4.314	63/344	341,1120,1622,2064,2065,2170,2252,2254,2534,2549,3082,3357,3613,3667,3949,4254,5154,5156,5159,5287,5295,5305,5337,5359,5783,5833,8398,8503,8660,8760,9600,10162,10423,10554,10555,23175,23446,26090,26751,27132,27315,51227,54344,54872,55326,55650,57515,63874,64900,65258,79143,80235,84803,84812,93210,94005,114884,129303,129642,154141,254531,347735,376497	APOC1,CHKB,DBI,ERBB2,ERBB3,FABP3,FGF7,FGF9,FYN,GAB1,HGF,HTR2B,IMPA2,IRS1,LDLR,KITLG,PDGFA,PDGFRA,PDGFRB,PIK3C2B,PIK3R1,PIP4K2A,PLD1,PLSCR1,PTPN13,PCYT2,PLA2G6,PIK3R3,IRS2,CDS2,PITPNM1,LPCAT3,CDIPT,AGPAT1,AGPAT2,LPIN1,SLC44A1,ABHD12,SH3YL1,CPNE7,PGAP2,PIGP,DPM3,PIGG,AGPAT5,PIGV,SERINC1,ABHD4,LPIN3,MPPE1,MBOAT7,PIGZ,GPAT3,PLCD4,PGAP3,PIGS,OSBPL10,TMEM150A,MBOAT2,MBOAT1,LPCAT4,SERINC2,SLC27A1
18_Summary	Hallmark Gene Sets	M5939	HALLMARK P53 PATHWAY	-20.1371	-17.418	76/200	18,100,467,650,677,694,834,894,1012,1026,1030,1263,1509,1839,1969,2040,2052,2149,2232,2517,2760,2872,3006,3162,3625,3732,4013,4071,4084,4814,5154,5791,5900,6275,6281,6303,6890,6948,7378,7421,7704,7832,8651,8722,8851,8870,8877,9314,10057,10140,10397,10437,10608,10614,10628,10769,22891,23303,23479,23645,23654,23657,26471,26999,27244,29948,51768,54541,54884,55240,55367,56997,57763,63874,64393,92815	ABAT,ADA,ATF3,BMP2,ZFP36L1,BTG1,CASP1,CCND2,CDH13,CDKN1A,CDKN2B,PLK3,CTSD,HBEGF,EPHA2,STOM,EPHX1,F2R,FDXR,FUCA1,GM2A,MKNK2,HIST1H1C,HMOX1,INHBB,CD82,VWA5A,TM4SF1,MXD1,NINJ1,PDGFA,PTPRE,RALGDS,S100A4,S100A10,SAT1,TAP1,TCN2,UPP1,VDR,ZBTB16,BTG2,SOCS1,CTSF,CDK5R1,IER3,SPHK1,KLF4,ABCC5,TOB1,NDRG1,IFI30,MXD4,HEXIM1,TXNIP,PLK2,ZNF365,KIF13B,ISCU,PPP1R15A,PLXNB2,SLC7A11,NUPR1,CYFIP2,SESN1,OSGIN1,TM7SF3,…
18_Member	Hallmark Gene Sets	M5939	HALLMARK P53 PATHWAY	-20.1371	-17.418	76/200	18,100,467,650,677,694,834,894,1012,1026,1030,1263,1509,1839,1969,2040,2052,2149,2232,2517,2760,2872,3006,3162,3625,3732,4013,4071,4084,4814,5154,5791,5900,6275,6281,6303,6890,6948,7378,7421,7704,7832,8651,8722,8851,8870,8877,9314,10057,10140,10397,10437,10608,10614,10628,10769,22891,23303,23479,23645,23654,23657,26471,26999,27244,29948,51768,54541,54884,55240,55367,56997,57763,63874,64393,92815	ABAT,ADA,ATF3,BMP2,ZFP36L1,BTG1,CASP1,CCND2,CDH13,CDKN1A,CDKN2B,PLK3,CTSD,HBEGF,EPHA2,STOM,EPHX1,F2R,FDXR,FUCA1,GM2A,MKNK2,HIST1H1C,HMOX1,INHBB,CD82,VWA5A,TM4SF1,MXD1,NINJ1,PDGFA,PTPRE,RALGDS,S100A4,S100A10,SAT1,TAP1,TCN2,UPP1,VDR,ZBTB16,BTG2,SOCS1,CTSF,CDK5R1,IER3,SPHK1,KLF4,ABCC5,TOB1,NDRG1,IFI30,MXD4,HEXIM1,TXNIP,PLK2,ZNF365,KIF13B,ISCU,PPP1R15A,PLXNB2,SLC7A11,NUPR1,CYFIP2,SESN1,OSGIN1,TM7SF3,…
19_Summary	Hallmark Gene Sets	M5892	HALLMARK CHOLESTEROL HOMEOSTASIS	-19.5231	-16.84	39/74	20,39,182,230,1191,1595,1717,1891,2194,2224,2946,3156,3157,3422,3949,4047,4597,4598,4783,5359,5468,5641,5833,6309,6319,6713,6721,7108,9415,10682,10957,26270,27346,50814,51478,54206,55902,94241,116496,47,348,1718,2539,3638,5447,6307,6720,11161,22937,51422,51700,51706,19,341,847,1593,2055,2232,3953,4041,6770,8542,10577,23780,55809,255738,285440,133,650,706,1958,2246,3290,3294,3490,3553,5087,5618,65…	ABCA2,ACAT2,JAG1,ALDOC,CLU,CYP51A1,DHCR7,ECH1,FASN,FDPS,GSTM2,HMGCR,HMGCS1,IDI1,LDLR,LSS,MVD,MVK,NFIL3,PLSCR1,PPARG,LGMN,PCYT2,SC5D,SCD,SQLE,SREBF2,TM7SF2,FADS2,EBP,PNRC1,FBXO6,TMEM97,NSDHL,HSD17B7,ERRFI1,ACSS2,TP53INP1,FAM129A,ACLY,APOE,DHCR24,G6PD,INSIG1,POR,MSMO1,SREBF1,C14orf1,SCAP,PRKAG2,CYB5R2,CYB5R1,ABCA1,APOC1,CAT,CYP27A1,CLN8,FDXR,LEPR,LRP5,STAR,APOL1,NPC2,APOL2,TRERF1,PCSK9,CYP4V2,ADM,B…
19_Member	Hallmark Gene Sets	M5892	HALLMARK CHOLESTEROL HOMEOSTASIS	-19.5231	-16.84	39/74	20,39,182,230,1191,1595,1717,1891,2194,2224,2946,3156,3157,3422,3949,4047,4597,4598,4783,5359,5468,5641,5833,6309,6319,6713,6721,7108,9415,10682,10957,26270,27346,50814,51478,54206,55902,94241,116496	ABCA2,ACAT2,JAG1,ALDOC,CLU,CYP51A1,DHCR7,ECH1,FASN,FDPS,GSTM2,HMGCR,HMGCS1,IDI1,LDLR,LSS,MVD,MVK,NFIL3,PLSCR1,PPARG,LGMN,PCYT2,SC5D,SCD,SQLE,SREBF2,TM7SF2,FADS2,EBP,PNRC1,FBXO6,TMEM97,NSDHL,HSD17B7,ERRFI1,ACSS2,TP53INP1,FAM129A
19_Member	GO Biological Processes	GO:0016126	sterol biosynthetic process	-14.4207	-12.147	29/56	39,47,348,1595,1717,1718,2224,2539,3156,3157,3422,3638,4047,4597,4598,5447,6307,6309,6713,6720,7108,10682,11161,22937,50814,51422,51478,51700,51706	ACAT2,ACLY,APOE,CYP51A1,DHCR7,DHCR24,FDPS,G6PD,HMGCR,HMGCS1,IDI1,INSIG1,LSS,MVD,MVK,POR,MSMO1,SC5D,SQLE,SREBF1,TM7SF2,EBP,C14orf1,SCAP,NSDHL,PRKAG2,HSD17B7,CYB5R2,CYB5R1
19_Member	Reactome Gene Sets	R-HSA-191273	Cholesterol biosynthesis	-13.1828	-10.977	18/24	39,1595,1717,1718,2224,3156,3157,3422,4047,4597,4598,6307,6309,6713,7108,10682,50814,51478	ACAT2,CYP51A1,DHCR7,DHCR24,FDPS,HMGCR,HMGCS1,IDI1,LSS,MVD,MVK,MSMO1,SC5D,SQLE,TM7SF2,EBP,NSDHL,HSD17B7
19_Member	GO Biological Processes	GO:0016125	sterol metabolic process	-13.1366	-10.935	46/139	19,39,47,341,348,847,1593,1595,1717,1718,2055,2224,2232,2539,3156,3157,3422,3638,3949,3953,4041,4047,4597,4598,5447,6307,6309,6713,6720,6721,6770,7108,8542,10577,10682,11161,22937,23780,50814,51422,51478,51700,51706,55809,255738,285440	ABCA1,ACAT2,ACLY,APOC1,APOE,CAT,CYP27A1,CYP51A1,DHCR7,DHCR24,CLN8,FDPS,FDXR,G6PD,HMGCR,HMGCS1,IDI1,INSIG1,LDLR,LEPR,LRP5,LSS,MVD,MVK,POR,MSMO1,SC5D,SQLE,SREBF1,SREBF2,STAR,TM7SF2,APOL1,NPC2,EBP,C14orf1,SCAP,APOL2,NSDHL,PRKAG2,HSD17B7,CYB5R2,CYB5R1,TRERF1,PCSK9,CYP4V2
19_Member	GO Biological Processes	GO:1902653	secondary alcohol biosynthetic process	-12.5278	-10.374	26/52	39,47,348,1595,1717,1718,2224,2539,3156,3157,3422,3638,4047,4597,4598,5447,6307,6309,6713,6720,7108,10682,11161,22937,50814,51478	ACAT2,ACLY,APOE,CYP51A1,DHCR7,DHCR24,FDPS,G6PD,HMGCR,HMGCS1,IDI1,INSIG1,LSS,MVD,MVK,POR,MSMO1,SC5D,SQLE,SREBF1,TM7SF2,EBP,C14orf1,SCAP,NSDHL,HSD17B7
19_Member	GO Biological Processes	GO:0006694	steroid biosynthetic process	-12.0132	-9.905	55/165	39,47,133,348,650,706,1593,1595,1717,1718,1958,2224,2232,2246,2539,3156,3157,3290,3294,3422,3490,3553,3638,4047,4597,4598,5087,5447,5618,6307,6309,6591,6615,6713,6720,6770,7108,7421,8912,10682,10891,11161,22937,23541,50814,51141,51170,51171,51422,51478,51700,51706,54361,55809,79644	ACAT2,ACLY,ADM,APOE,BMP2,TSPO,CYP27A1,CYP51A1,DHCR7,DHCR24,EGR1,FDPS,FDXR,FGF1,G6PD,HMGCR,HMGCS1,HSD11B1,HSD17B2,IDI1,IGFBP7,IL1B,INSIG1,LSS,MVD,MVK,PBX1,POR,PRLR,MSMO1,SC5D,SNAI2,SNAI1,SQLE,SREBF1,STAR,TM7SF2,VDR,CACNA1H,EBP,PPARGC1A,C14orf1,SCAP,SEC14L2,NSDHL,INSIG2,HSD17B11,HSD17B14,PRKAG2,HSD17B7,CYB5R2,CYB5R1,WNT4,TRERF1,SRD5A3
19_Member	GO Biological Processes	GO:0006695	cholesterol biosynthetic process	-11.8214	-9.732	25/51	39,47,348,1595,1717,1718,2224,2539,3156,3157,3422,3638,4047,4597,4598,5447,6307,6309,6713,6720,7108,10682,22937,50814,51478	ACAT2,ACLY,APOE,CYP51A1,DHCR7,DHCR24,FDPS,G6PD,HMGCR,HMGCS1,IDI1,INSIG1,LSS,MVD,MVK,POR,MSMO1,SC5D,SQLE,SREBF1,TM7SF2,EBP,SCAP,NSDHL,HSD17B7
19_Member	GO Biological Processes	GO:1902652	secondary alcohol metabolic process	-11.5156	-9.449	41/126	19,39,47,341,348,847,1595,1717,1718,2055,2224,2232,2539,3156,3157,3422,3638,3949,3953,4041,4047,4597,4598,5447,6307,6309,6713,6720,6721,6770,7108,8542,10577,10682,11161,22937,23780,50814,51478,55809,255738	ABCA1,ACAT2,ACLY,APOC1,APOE,CAT,CYP51A1,DHCR7,DHCR24,CLN8,FDPS,FDXR,G6PD,HMGCR,HMGCS1,IDI1,INSIG1,LDLR,LEPR,LRP5,LSS,MVD,MVK,POR,MSMO1,SC5D,SQLE,SREBF1,SREBF2,STAR,TM7SF2,APOL1,NPC2,EBP,C14orf1,SCAP,APOL2,NSDHL,HSD17B7,TRERF1,PCSK9
19_Member	GO Biological Processes	GO:0008203	cholesterol metabolic process	-11.4992	-9.436	40/121	19,39,47,341,348,847,1595,1717,1718,2055,2224,2232,2539,3156,3157,3422,3638,3949,3953,4041,4047,4597,4598,5447,6307,6309,6713,6720,6721,6770,7108,8542,10577,10682,22937,23780,50814,51478,55809,255738	ABCA1,ACAT2,ACLY,APOC1,APOE,CAT,CYP51A1,DHCR7,DHCR24,CLN8,FDPS,FDXR,G6PD,HMGCR,HMGCS1,IDI1,INSIG1,LDLR,LEPR,LRP5,LSS,MVD,MVK,POR,MSMO1,SC5D,SQLE,SREBF1,SREBF2,STAR,TM7SF2,APOL1,NPC2,EBP,SCAP,APOL2,NSDHL,HSD17B7,TRERF1,PCSK9
19_Member	GO Biological Processes	GO:0006066	alcohol metabolic process	-11.0854	-9.049	68/287	19,39,47,125,216,217,220,221,224,341,348,847,1595,1717,1718,2055,2185,2224,2232,2539,2629,2710,3156,3157,3422,3553,3613,3638,3706,3707,3949,3953,4041,4047,4597,4598,5332,5447,6307,6309,6713,6720,6721,6770,7108,8542,8877,10577,10682,11161,22937,23780,26002,27235,50814,51477,51478,54884,55190,55331,55809,55902,79644,84532,84812,157506,255738,340485	ABCA1,ACAT2,ACLY,ADH1B,ALDH1A1,ALDH2,ALDH1A3,ALDH3B1,ALDH3A2,APOC1,APOE,CAT,CYP51A1,DHCR7,DHCR24,CLN8,PTK2B,FDPS,FDXR,G6PD,GBA,GK,HMGCR,HMGCS1,IDI1,IL1B,IMPA2,INSIG1,ITPKA,ITPKB,LDLR,LEPR,LRP5,LSS,MVD,MVK,PLCB4,POR,MSMO1,SC5D,SQLE,SREBF1,SREBF2,STAR,TM7SF2,APOL1,SPHK1,NPC2,EBP,C14orf1,SCAP,APOL2,MOXD1,COQ2,NSDHL,ISYNA1,HSD17B7,RETSAT,NUDT11,ACER3,TRERF1,ACSS2,SRD5A3,ACSS1,PLCD4,RDH10,PCSK9,ACER2
19_Member	GO Biological Processes	GO:0008202	steroid metabolic process	-11.0815	-9.049	78/291	19,39,47,133,341,348,412,650,706,847,1593,1595,1645,1717,1718,1958,2055,2224,2232,2246,2539,3156,3157,3290,3294,3422,3490,3553,3638,3949,3953,4041,4047,4597,4598,5087,5447,5467,5618,5641,6095,6307,6309,6591,6615,6713,6720,6721,6770,6777,7108,7292,7421,8542,8912,10577,10682,10891,11161,22937,23541,23780,25976,50814,51141,51170,51171,51422,51478,51700,51706,51741,54361,55809,64788,79644,255738,2854…	ABCA1,ACAT2,ACLY,ADM,APOC1,APOE,STS,BMP2,TSPO,CAT,CYP27A1,CYP51A1,AKR1C1,DHCR7,DHCR24,EGR1,CLN8,FDPS,FDXR,FGF1,G6PD,HMGCR,HMGCS1,HSD11B1,HSD17B2,IDI1,IGFBP7,IL1B,INSIG1,LDLR,LEPR,LRP5,LSS,MVD,MVK,PBX1,POR,PPARD,PRLR,LGMN,RORA,MSMO1,SC5D,SNAI2,SNAI1,SQLE,SREBF1,SREBF2,STAR,STAT5B,TM7SF2,TNFSF4,VDR,APOL1,CACNA1H,NPC2,EBP,PPARGC1A,C14orf1,SCAP,SEC14L2,APOL2,TIPARP,NSDHL,INSIG2,HSD17B11,HSD17B14,PRKA…
19_Member	KEGG Pathway	M00101	Cholesterol biosynthesis, squalene 2,3-epoxide => cholesterol	-11.0273	-9.004	43050	1595,1717,1718,4047,6307,6309,7108,10682,10826,50814,51478	CYP51A1,DHCR7,DHCR24,LSS,MSMO1,SC5D,TM7SF2,EBP,FAXDC2,NSDHL,HSD17B7
19_Member	KEGG Pathway	hsa_M00101	Cholesterol biosynthesis, squalene 2,3-epoxide => cholesterol	-11.0273	-9.004	43050	1595,1717,1718,4047,6307,6309,7108,10682,10826,50814,51478	CYP51A1,DHCR7,DHCR24,LSS,MSMO1,SC5D,TM7SF2,EBP,FAXDC2,NSDHL,HSD17B7
19_Member	GO Biological Processes	GO:1901615	organic hydroxy compound metabolic process	-10.4294	-8.475	93/464	18,19,39,47,125,216,217,220,221,224,341,348,847,1497,1593,1595,1645,1717,1718,2034,2055,2185,2224,2232,2304,2539,2629,2710,3156,3157,3422,3553,3613,3638,3706,3707,3949,3953,4041,4047,4128,4597,4598,4929,5332,5360,5447,5641,6307,6309,6591,6615,6713,6720,6721,6770,7108,7474,8542,8864,8877,8912,9464,10404,10577,10682,11161,22937,23780,25953,26002,27235,50814,51301,51422,51477,51478,51700,51706,54361…	ABAT,ABCA1,ACAT2,ACLY,ADH1B,ALDH1A1,ALDH2,ALDH1A3,ALDH3B1,ALDH3A2,APOC1,APOE,CAT,CTNS,CYP27A1,CYP51A1,AKR1C1,DHCR7,DHCR24,EPAS1,CLN8,PTK2B,FDPS,FDXR,FOXE1,G6PD,GBA,GK,HMGCR,HMGCS1,IDI1,IL1B,IMPA2,INSIG1,ITPKA,ITPKB,LDLR,LEPR,LRP5,LSS,MAOA,MVD,MVK,NR4A2,PLCB4,PLTP,POR,LGMN,MSMO1,SC5D,SNAI2,SNAI1,SQLE,SREBF1,SREBF2,STAR,TM7SF2,WNT5A,APOL1,PER2,SPHK1,CACNA1H,HAND2,CPQ,NPC2,EBP,C14orf1,SCAP,APOL2,PNK…
19_Member	GO Biological Processes	GO:0046165	alcohol biosynthetic process	-10.3974	-8.45	35/104	39,47,348,1595,1717,1718,2185,2224,2539,2629,3156,3157,3422,3553,3613,3638,4047,4597,4598,5447,6307,6309,6713,6720,7108,8877,10682,11161,22937,26002,50814,51477,51478,55331,340485	ACAT2,ACLY,APOE,CYP51A1,DHCR7,DHCR24,PTK2B,FDPS,G6PD,GBA,HMGCR,HMGCS1,IDI1,IL1B,IMPA2,INSIG1,LSS,MVD,MVK,POR,MSMO1,SC5D,SQLE,SREBF1,TM7SF2,SPHK1,EBP,C14orf1,SCAP,MOXD1,NSDHL,ISYNA1,HSD17B7,ACER3,ACER2
19_Member	Reactome Gene Sets	R-HSA-2426168	Activation of gene expression by SREBF (SREBP)	-9.29685	-7.428	20/42	1595,1717,2194,2224,3156,3157,3422,4047,4597,4598,5465,6309,6319,6713,6720,6721,6907,7108,79071,85441	CYP51A1,DHCR7,FASN,FDPS,HMGCR,HMGCS1,IDI1,LSS,MVD,MVK,PPARA,SC5D,SCD,SQLE,SREBF1,SREBF2,TBL1X,TM7SF2,ELOVL6,HELZ2
19_Member	GO Biological Processes	GO:1901617	organic hydroxy compound biosynthetic process	-9.02762	-7.178	50/202	39,47,348,1497,1593,1595,1717,1718,2185,2224,2539,2629,3156,3157,3422,3553,3613,3638,4047,4597,4598,4929,5360,5447,6307,6309,6591,6615,6713,6720,6770,7108,7474,8864,8877,8912,9464,10682,11161,22937,26002,50814,51422,51477,51478,51700,51706,54361,55331,340485	ACAT2,ACLY,APOE,CTNS,CYP27A1,CYP51A1,DHCR7,DHCR24,PTK2B,FDPS,G6PD,GBA,HMGCR,HMGCS1,IDI1,IL1B,IMPA2,INSIG1,LSS,MVD,MVK,NR4A2,PLTP,POR,MSMO1,SC5D,SNAI2,SNAI1,SQLE,SREBF1,STAR,TM7SF2,WNT5A,PER2,SPHK1,CACNA1H,HAND2,EBP,C14orf1,SCAP,MOXD1,NSDHL,PRKAG2,ISYNA1,HSD17B7,CYB5R2,CYB5R1,WNT4,ACER3,ACER2
19_Member	Reactome Gene Sets	R-HSA-1655829	Regulation of cholesterol biosynthesis by SREBP (SREBF)	-8.37932	-6.604	22/55	1595,1717,2194,2224,3156,3157,3422,3638,4047,4597,4598,5465,6309,6319,6713,6720,6721,6907,7108,22937,79071,85441	CYP51A1,DHCR7,FASN,FDPS,HMGCR,HMGCS1,IDI1,INSIG1,LSS,MVD,MVK,PPARA,SC5D,SCD,SQLE,SREBF1,SREBF2,TBL1X,TM7SF2,SCAP,ELOVL6,HELZ2
19_Member	KEGG Pathway	hsa00100	Steroid biosynthesis	-7.26338	-5.6	44166	1595,1717,1718,4047,6307,6309,6713,7108,10682,10826,50814,51478	CYP51A1,DHCR7,DHCR24,LSS,MSMO1,SC5D,SQLE,TM7SF2,EBP,FAXDC2,NSDHL,HSD17B7
19_Member	KEGG Pathway	ko00100	Steroid biosynthesis	-7.26338	-5.6	44166	1595,1717,1718,4047,6307,6309,6713,7108,10682,10826,50814,51478	CYP51A1,DHCR7,DHCR24,LSS,MSMO1,SC5D,SQLE,TM7SF2,EBP,FAXDC2,NSDHL,HSD17B7
20_Summary	KEGG Pathway	hsa04510	Focal adhesion	-18.9787	-16.33	70/199	60,71,81,87,329,330,387,595,596,824,857,858,894,1277,1291,1292,1293,1298,1729,1950,2002,2317,2318,2321,2335,2534,3082,3265,3371,3655,3672,3673,3675,3676,3679,3688,3690,3693,3791,3910,3911,3914,3918,4233,5058,5154,5155,5295,5500,5501,5599,5602,5829,5880,6696,7058,7059,7408,7422,7424,9475,10000,10398,22801,56034,80310,83660,103910,284217,399694,672,1017,1021,1129,1388,1436,1902,1946,1969,1978,2149,…	ACTB,ACTG1,ACTN4,ACTN1,BIRC2,BIRC3,RHOA,CCND1,BCL2,CAPN2,CAV1,CAV2,CCND2,COL1A1,COL6A1,COL6A2,COL6A3,COL9A2,DIAPH1,EGF,ELK1,FLNB,FLNC,FLT1,FN1,FYN,HGF,HRAS,TNC,ITGA6,ITGA1,ITGA2,ITGA3,ITGA4,ITGA7,ITGB1,ITGB3,ITGB5,KDR,LAMA4,LAMA5,LAMB3,LAMC2,MET,PAK1,PDGFA,PDGFB,PIK3R1,PPP1CB,PPP1CC,MAPK8,MAPK10,PXN,RAC2,SPP1,THBS2,THBS3,VASP,VEGFA,VEGFC,ROCK2,AKT3,MYL9,ITGA11,PDGFC,PDGFD,TLN2,MYL12B,LAMA1,SHC4,B…
20_Member	KEGG Pathway	hsa04510	Focal adhesion	-18.9787	-16.33	70/199	60,71,81,87,329,330,387,595,596,824,857,858,894,1277,1291,1292,1293,1298,1729,1950,2002,2317,2318,2321,2335,2534,3082,3265,3371,3655,3672,3673,3675,3676,3679,3688,3690,3693,3791,3910,3911,3914,3918,4233,5058,5154,5155,5295,5500,5501,5599,5602,5829,5880,6696,7058,7059,7408,7422,7424,9475,10000,10398,22801,56034,80310,83660,103910,284217,399694	ACTB,ACTG1,ACTN4,ACTN1,BIRC2,BIRC3,RHOA,CCND1,BCL2,CAPN2,CAV1,CAV2,CCND2,COL1A1,COL6A1,COL6A2,COL6A3,COL9A2,DIAPH1,EGF,ELK1,FLNB,FLNC,FLT1,FN1,FYN,HGF,HRAS,TNC,ITGA6,ITGA1,ITGA2,ITGA3,ITGA4,ITGA7,ITGB1,ITGB3,ITGB5,KDR,LAMA4,LAMA5,LAMB3,LAMC2,MET,PAK1,PDGFA,PDGFB,PIK3R1,PPP1CB,PPP1CC,MAPK8,MAPK10,PXN,RAC2,SPP1,THBS2,THBS3,VASP,VEGFA,VEGFC,ROCK2,AKT3,MYL9,ITGA11,PDGFC,PDGFD,TLN2,MYL12B,LAMA1,SHC4
20_Member	KEGG Pathway	ko04510	Focal adhesion	-18.9787	-16.33	70/199	60,71,81,87,329,330,387,595,596,824,857,858,894,1277,1291,1292,1293,1298,1729,1950,2002,2317,2318,2321,2335,2534,3082,3265,3371,3655,3672,3673,3675,3676,3679,3688,3690,3693,3791,3910,3911,3914,3918,4233,5058,5154,5155,5295,5500,5501,5599,5602,5829,5880,6696,7058,7059,7408,7422,7424,9475,10000,10398,22801,56034,80310,83660,103910,284217,399694	ACTB,ACTG1,ACTN4,ACTN1,BIRC2,BIRC3,RHOA,CCND1,BCL2,CAPN2,CAV1,CAV2,CCND2,COL1A1,COL6A1,COL6A2,COL6A3,COL9A2,DIAPH1,EGF,ELK1,FLNB,FLNC,FLT1,FN1,FYN,HGF,HRAS,TNC,ITGA6,ITGA1,ITGA2,ITGA3,ITGA4,ITGA7,ITGB1,ITGB3,ITGB5,KDR,LAMA4,LAMA5,LAMB3,LAMC2,MET,PAK1,PDGFA,PDGFB,PIK3R1,PPP1CB,PPP1CC,MAPK8,MAPK10,PXN,RAC2,SPP1,THBS2,THBS3,VASP,VEGFA,VEGFC,ROCK2,AKT3,MYL9,ITGA11,PDGFC,PDGFD,TLN2,MYL12B,LAMA1,SHC4
20_Member	KEGG Pathway	hsa04151	PI3K-Akt signaling pathway	-13.0295	-10.839	86/342	595,596,672,894,1017,1021,1129,1277,1291,1292,1293,1298,1388,1436,1902,1946,1950,1969,1978,2149,2246,2247,2250,2254,2321,2335,3082,3164,3265,3320,3371,3566,3570,3575,3643,3655,3672,3673,3675,3676,3679,3688,3690,3693,3717,3791,3815,3910,3911,3914,3918,4233,4254,4609,4803,5106,5154,5155,5295,5523,5525,5617,5618,6446,6696,7058,7059,7422,7424,7533,7534,9134,9170,9180,9586,10000,10971,22801,23239,2356…	CCND1,BCL2,BRCA1,CCND2,CDK2,CDK6,CHRM2,COL1A1,COL6A1,COL6A2,COL6A3,COL9A2,ATF6B,CSF1R,LPAR1,EFNA5,EGF,EPHA2,EIF4EBP1,F2R,FGF1,FGF2,FGF5,FGF9,FLT1,FN1,HGF,NR4A1,HRAS,HSP90AA1,TNC,IL4R,IL6R,IL7R,INSR,ITGA6,ITGA1,ITGA2,ITGA3,ITGA4,ITGA7,ITGB1,ITGB3,ITGB5,JAK2,KDR,KIT,LAMA4,LAMA5,LAMB3,LAMC2,MET,KITLG,MYC,NGF,PCK2,PDGFA,PDGFB,PIK3R1,PPP2R3A,PPP2R5A,PRL,PRLR,SGK1,SPP1,THBS2,THBS3,VEGFA,VEGFC,YWHAH,YWH…
20_Member	KEGG Pathway	ko04151	PI3K-Akt signaling pathway	-13.0295	-10.839	86/342	595,596,672,894,1017,1021,1129,1277,1291,1292,1293,1298,1388,1436,1902,1946,1950,1969,1978,2149,2246,2247,2250,2254,2321,2335,3082,3164,3265,3320,3371,3566,3570,3575,3643,3655,3672,3673,3675,3676,3679,3688,3690,3693,3717,3791,3815,3910,3911,3914,3918,4233,4254,4609,4803,5106,5154,5155,5295,5523,5525,5617,5618,6446,6696,7058,7059,7422,7424,7533,7534,9134,9170,9180,9586,10000,10971,22801,23239,2356…	CCND1,BCL2,BRCA1,CCND2,CDK2,CDK6,CHRM2,COL1A1,COL6A1,COL6A2,COL6A3,COL9A2,ATF6B,CSF1R,LPAR1,EFNA5,EGF,EPHA2,EIF4EBP1,F2R,FGF1,FGF2,FGF5,FGF9,FLT1,FN1,HGF,NR4A1,HRAS,HSP90AA1,TNC,IL4R,IL6R,IL7R,INSR,ITGA6,ITGA1,ITGA2,ITGA3,ITGA4,ITGA7,ITGB1,ITGB3,ITGB5,JAK2,KDR,KIT,LAMA4,LAMA5,LAMB3,LAMC2,MET,KITLG,MYC,NGF,PCK2,PDGFA,PDGFB,PIK3R1,PPP2R3A,PPP2R5A,PRL,PRLR,SGK1,SPP1,THBS2,THBS3,VEGFA,VEGFC,YWHAH,YWH…
20_Member	KEGG Pathway	ko04015	Rap1 signaling pathway	-8.81428	-7	54/210	60,71,109,387,805,1436,1902,1946,1950,1969,2149,2246,2247,2250,2254,2321,2776,3082,3265,3643,3688,3690,3791,3815,4233,4254,4803,5154,5155,5216,5295,5332,5606,5880,5898,7408,7422,7424,9170,9732,10000,10235,10411,10636,23094,23566,25780,26037,51735,54518,56034,64411,80310,83660	ACTB,ACTG1,ADCY3,RHOA,CALM2,CSF1R,LPAR1,EFNA5,EGF,EPHA2,F2R,FGF1,FGF2,FGF5,FGF9,FLT1,GNAQ,HGF,HRAS,INSR,ITGB1,ITGB3,KDR,KIT,MET,KITLG,NGF,PDGFA,PDGFB,PFN1,PIK3R1,PLCB4,MAP2K3,RAC2,RALA,VASP,VEGFA,VEGFC,LPAR2,DOCK4,AKT3,RASGRP2,RAPGEF3,RGS14,SIPA1L3,LPAR3,RASGRP3,SIPA1L1,RAPGEF6,APBB1IP,PDGFC,ARAP3,PDGFD,TLN2
20_Member	KEGG Pathway	hsa04015	Rap1 signaling pathway	-8.81428	-7	54/210	60,71,109,387,805,1436,1902,1946,1950,1969,2149,2246,2247,2250,2254,2321,2776,3082,3265,3643,3688,3690,3791,3815,4233,4254,4803,5154,5155,5216,5295,5332,5606,5880,5898,7408,7422,7424,9170,9732,10000,10235,10411,10636,23094,23566,25780,26037,51735,54518,56034,64411,80310,83660	ACTB,ACTG1,ADCY3,RHOA,CALM2,CSF1R,LPAR1,EFNA5,EGF,EPHA2,F2R,FGF1,FGF2,FGF5,FGF9,FLT1,GNAQ,HGF,HRAS,INSR,ITGB1,ITGB3,KDR,KIT,MET,KITLG,NGF,PDGFA,PDGFB,PFN1,PIK3R1,PLCB4,MAP2K3,RAC2,RALA,VASP,VEGFA,VEGFC,LPAR2,DOCK4,AKT3,RASGRP2,RAPGEF3,RGS14,SIPA1L3,LPAR3,RASGRP3,SIPA1L1,RAPGEF6,APBB1IP,PDGFC,ARAP3,PDGFD,TLN2
20_Member	KEGG Pathway	hsa04810	Regulation of actin cytoskeleton	-8.73953	-6.928	44/212	60,71,81,87,387,1072,1073,1129,1729,1950,2149,2246,2247,2250,2254,2335,3265,3672,3673,3675,3676,3679,3688,3690,3693,4478,4627,5058,5155,5216,5305,5501,5829,5880,7430,10788,22801,55740,55970,56034,80310,81624,81873,128239	ACTB,ACTG1,ACTN4,ACTN1,RHOA,CFL1,CFL2,CHRM2,DIAPH1,EGF,F2R,FGF1,FGF2,FGF5,FGF9,FN1,HRAS,ITGA1,ITGA2,ITGA3,ITGA4,ITGA7,ITGB1,ITGB3,ITGB5,MSN,MYH9,PAK1,PDGFB,PFN1,PIP4K2A,PPP1CC,PXN,RAC2,EZR,IQGAP2,ITGA11,ENAH,GNG12,PDGFC,PDGFD,DIAPH3,ARPC5L,IQGAP3
20_Member	KEGG Pathway	ko04810	Regulation of actin cytoskeleton	-8.73953	-6.928	44/212	60,71,81,87,387,1072,1073,1129,1729,1950,2149,2246,2247,2250,2254,2335,3265,3672,3673,3675,3676,3679,3688,3690,3693,4478,4627,5058,5155,5216,5305,5501,5829,5880,7430,10788,22801,55740,55970,56034,80310,81624,81873,128239	ACTB,ACTG1,ACTN4,ACTN1,RHOA,CFL1,CFL2,CHRM2,DIAPH1,EGF,F2R,FGF1,FGF2,FGF5,FGF9,FN1,HRAS,ITGA1,ITGA2,ITGA3,ITGA4,ITGA7,ITGB1,ITGB3,ITGB5,MSN,MYH9,PAK1,PDGFB,PFN1,PIP4K2A,PPP1CC,PXN,RAC2,EZR,IQGAP2,ITGA11,ENAH,GNG12,PDGFC,PDGFD,DIAPH3,ARPC5L,IQGAP3
20_Member	KEGG Pathway	hsa04014	Ras signaling pathway	-5.47489	-3.994	62/227	25,27,284,387,805,1435,1436,1945,1950,1969,2002,2113,2114,2246,2247,2250,2252,2254,2321,2549,2791,3082,3265,3363,3643,3791,3815,4233,4254,4303,4803,5058,5155,5156,5159,5295,5337,5599,5602,5880,5881,5898,5900,5921,5924,7422,7424,8398,8503,9610,9846,10000,10156,10235,10681,22800,25780,53358,55970,56034,80310,399694	ABL1,ABL2,ANGPT1,RHOA,CALM2,CSF1,CSF1R,EFNA4,EGF,EPHA2,ELK1,ETS1,ETS2,FGF1,FGF2,FGF5,FGF7,FGF9,FLT1,GAB1,GNG11,HGF,HRAS,HTR7,INSR,KDR,KIT,MET,KITLG,FOXO4,NGF,PAK1,PDGFB,PDGFRA,PDGFRB,PIK3R1,PLD1,MAPK8,MAPK10,RAC2,RAC3,RALA,RALGDS,RASA1,RASGRF2,VEGFA,VEGFC,PLA2G6,PIK3R3,RIN1,GAB2,AKT3,RASA4,RASGRP2,GNB5,RRAS2,RASGRP3,SHC3,GNG12,PDGFC,PDGFD,SHC4

## Sheet: Suppl Table 3B ESFto3dUP META
GroupID	Category	Term	Description	LogP	Log(q-value)	InTerm_InList	Genes	Symbols
1_Summary	Hallmark Gene Sets	M5892	HALLMARK CHOLESTEROL HOMEOSTASIS	-18.4355	-14.185	35/74	20,182,230,1191,1595,1717,1891,2194,2946,3156,3157,3422,3949,4047,4597,4598,4783,5359,5468,5641,5833,6309,6319,6713,6721,7108,9415,10957,26270,27346,50814,51478,54206,55902,94241,47,348,1718,2539,3638,5447,6307,6720,11161,22937,51706,19,341,847,1593,2055,2232,3953,4041,6770,8542,10577,255738,285440,18,125,216,217,220,221,224,1497,1645,2034,2185,2304,2629,2710,3553,3613,3707,4128,4929,5360,6615,74…	ABCA2,JAG1,ALDOC,CLU,CYP51A1,DHCR7,ECH1,FASN,GSTM2,HMGCR,HMGCS1,IDI1,LDLR,LSS,MVD,MVK,NFIL3,PLSCR1,PPARG,LGMN,PCYT2,SC5D,SCD,SQLE,SREBF2,TM7SF2,FADS2,PNRC1,FBXO6,TMEM97,NSDHL,HSD17B7,ERRFI1,ACSS2,TP53INP1,ACLY,APOE,DHCR24,G6PD,INSIG1,POR,MSMO1,SREBF1,C14orf1,SCAP,CYB5R1,ABCA1,APOC1,CAT,CYP27A1,CLN8,FDXR,LEPR,LRP5,STAR,APOL1,NPC2,PCSK9,CYP4V2,ABAT,ADH1B,ALDH1A1,ALDH2,ALDH1A3,ALDH3B1,ALDH3A2,CTNS,A…
1_Member	Hallmark Gene Sets	M5892	HALLMARK CHOLESTEROL HOMEOSTASIS	-18.4355	-14.185	35/74	20,182,230,1191,1595,1717,1891,2194,2946,3156,3157,3422,3949,4047,4597,4598,4783,5359,5468,5641,5833,6309,6319,6713,6721,7108,9415,10957,26270,27346,50814,51478,54206,55902,94241	ABCA2,JAG1,ALDOC,CLU,CYP51A1,DHCR7,ECH1,FASN,GSTM2,HMGCR,HMGCS1,IDI1,LDLR,LSS,MVD,MVK,NFIL3,PLSCR1,PPARG,LGMN,PCYT2,SC5D,SCD,SQLE,SREBF2,TM7SF2,FADS2,PNRC1,FBXO6,TMEM97,NSDHL,HSD17B7,ERRFI1,ACSS2,TP53INP1
1_Member	GO Biological Processes	GO:0016126	sterol biosynthetic process	-11.6832	-8.663	24/56	47,348,1595,1717,1718,2539,3156,3157,3422,3638,4047,4597,4598,5447,6307,6309,6713,6720,7108,11161,22937,50814,51478,51706	ACLY,APOE,CYP51A1,DHCR7,DHCR24,G6PD,HMGCR,HMGCS1,IDI1,INSIG1,LSS,MVD,MVK,POR,MSMO1,SC5D,SQLE,SREBF1,TM7SF2,C14orf1,SCAP,NSDHL,HSD17B7,CYB5R1
1_Member	GO Biological Processes	GO:1902653	secondary alcohol biosynthetic process	-11.5743	-8.579	23/52	47,348,1595,1717,1718,2539,3156,3157,3422,3638,4047,4597,4598,5447,6307,6309,6713,6720,7108,11161,22937,50814,51478	ACLY,APOE,CYP51A1,DHCR7,DHCR24,G6PD,HMGCR,HMGCS1,IDI1,INSIG1,LSS,MVD,MVK,POR,MSMO1,SC5D,SQLE,SREBF1,TM7SF2,C14orf1,SCAP,NSDHL,HSD17B7
1_Member	GO Biological Processes	GO:0016125	sterol metabolic process	-11.4621	-8.49	39/139	19,47,341,348,847,1593,1595,1717,1718,2055,2232,2539,3156,3157,3422,3638,3949,3953,4041,4047,4597,4598,5447,6307,6309,6713,6720,6721,6770,7108,8542,10577,11161,22937,50814,51478,51706,255738,285440	ABCA1,ACLY,APOC1,APOE,CAT,CYP27A1,CYP51A1,DHCR7,DHCR24,CLN8,FDXR,G6PD,HMGCR,HMGCS1,IDI1,INSIG1,LDLR,LEPR,LRP5,LSS,MVD,MVK,POR,MSMO1,SC5D,SQLE,SREBF1,SREBF2,STAR,TM7SF2,APOL1,NPC2,C14orf1,SCAP,NSDHL,HSD17B7,CYB5R1,PCSK9,CYP4V2
1_Member	GO Biological Processes	GO:1902652	secondary alcohol metabolic process	-10.8857	-7.977	36/126	19,47,341,348,847,1595,1717,1718,2055,2232,2539,3156,3157,3422,3638,3949,3953,4041,4047,4597,4598,5447,6307,6309,6713,6720,6721,6770,7108,8542,10577,11161,22937,50814,51478,255738	ABCA1,ACLY,APOC1,APOE,CAT,CYP51A1,DHCR7,DHCR24,CLN8,FDXR,G6PD,HMGCR,HMGCS1,IDI1,INSIG1,LDLR,LEPR,LRP5,LSS,MVD,MVK,POR,MSMO1,SC5D,SQLE,SREBF1,SREBF2,STAR,TM7SF2,APOL1,NPC2,C14orf1,SCAP,NSDHL,HSD17B7,PCSK9
1_Member	GO Biological Processes	GO:0006695	cholesterol biosynthetic process	-10.8326	-7.943	22/51	47,348,1595,1717,1718,2539,3156,3157,3422,3638,4047,4597,4598,5447,6307,6309,6713,6720,7108,22937,50814,51478	ACLY,APOE,CYP51A1,DHCR7,DHCR24,G6PD,HMGCR,HMGCS1,IDI1,INSIG1,LSS,MVD,MVK,POR,MSMO1,SC5D,SQLE,SREBF1,TM7SF2,SCAP,NSDHL,HSD17B7
1_Member	GO Biological Processes	GO:0008203	cholesterol metabolic process	-10.77	-7.899	35/121	19,47,341,348,847,1595,1717,1718,2055,2232,2539,3156,3157,3422,3638,3949,3953,4041,4047,4597,4598,5447,6307,6309,6713,6720,6721,6770,7108,8542,10577,22937,50814,51478,255738	ABCA1,ACLY,APOC1,APOE,CAT,CYP51A1,DHCR7,DHCR24,CLN8,FDXR,G6PD,HMGCR,HMGCS1,IDI1,INSIG1,LDLR,LEPR,LRP5,LSS,MVD,MVK,POR,MSMO1,SC5D,SQLE,SREBF1,SREBF2,STAR,TM7SF2,APOL1,NPC2,SCAP,NSDHL,HSD17B7,PCSK9
1_Member	Reactome Gene Sets	R-HSA-191273	Cholesterol biosynthesis	-10.5561	-7.703	15/24	1595,1717,1718,3156,3157,3422,4047,4597,4598,6307,6309,6713,7108,50814,51478	CYP51A1,DHCR7,DHCR24,HMGCR,HMGCS1,IDI1,LSS,MVD,MVK,MSMO1,SC5D,SQLE,TM7SF2,NSDHL,HSD17B7
1_Member	GO Biological Processes	GO:1901615	organic hydroxy compound metabolic process	-9.22537	-6.587	78/464	18,19,47,125,216,217,220,221,224,341,348,847,1497,1593,1595,1645,1717,1718,2034,2055,2185,2232,2304,2539,2629,2710,3156,3157,3422,3553,3613,3638,3707,3949,3953,4041,4047,4128,4597,4598,4929,5360,5447,5641,6307,6309,6615,6713,6720,6721,6770,7108,7474,8542,8864,8912,9464,10404,10577,11161,22937,25953,50814,51301,51477,51478,51706,54361,54884,55902,79644,84532,84812,157506,255738,285440,340485,728294	ABAT,ABCA1,ACLY,ADH1B,ALDH1A1,ALDH2,ALDH1A3,ALDH3B1,ALDH3A2,APOC1,APOE,CAT,CTNS,CYP27A1,CYP51A1,AKR1C1,DHCR7,DHCR24,EPAS1,CLN8,PTK2B,FDXR,FOXE1,G6PD,GBA,GK,HMGCR,HMGCS1,IDI1,IL1B,IMPA2,INSIG1,ITPKB,LDLR,LEPR,LRP5,LSS,MAOA,MVD,MVK,NR4A2,PLTP,POR,LGMN,MSMO1,SC5D,SNAI1,SQLE,SREBF1,SREBF2,STAR,TM7SF2,WNT5A,APOL1,PER2,CACNA1H,HAND2,CPQ,NPC2,C14orf1,SCAP,PNKD,NSDHL,GCNT4,ISYNA1,HSD17B7,CYB5R1,WNT4,RETS…
1_Member	GO Biological Processes	GO:0006066	alcohol metabolic process	-9.18081	-6.566	56/287	19,47,125,216,217,220,221,224,341,348,847,1595,1717,1718,2055,2185,2232,2539,2629,2710,3156,3157,3422,3553,3613,3638,3707,3949,3953,4041,4047,4597,4598,5447,6307,6309,6713,6720,6721,6770,7108,8542,10577,11161,22937,50814,51477,51478,54884,55902,79644,84532,84812,157506,255738,340485	ABCA1,ACLY,ADH1B,ALDH1A1,ALDH2,ALDH1A3,ALDH3B1,ALDH3A2,APOC1,APOE,CAT,CYP51A1,DHCR7,DHCR24,CLN8,PTK2B,FDXR,G6PD,GBA,GK,HMGCR,HMGCS1,IDI1,IL1B,IMPA2,INSIG1,ITPKB,LDLR,LEPR,LRP5,LSS,MVD,MVK,POR,MSMO1,SC5D,SQLE,SREBF1,SREBF2,STAR,TM7SF2,APOL1,NPC2,C14orf1,SCAP,NSDHL,ISYNA1,HSD17B7,RETSAT,ACSS2,SRD5A3,ACSS1,PLCD4,RDH10,PCSK9,ACER2
1_Member	GO Biological Processes	GO:0006694	steroid biosynthetic process	-9.02782	-6.449	39/165	47,133,348,706,1593,1595,1717,1718,2232,2539,3156,3157,3290,3422,3490,3553,3638,4047,4597,4598,5087,5447,6307,6309,6615,6713,6720,6770,7108,8912,11161,22937,50814,51170,51171,51478,51706,54361,79644	ACLY,ADM,APOE,TSPO,CYP27A1,CYP51A1,DHCR7,DHCR24,FDXR,G6PD,HMGCR,HMGCS1,HSD11B1,IDI1,IGFBP7,IL1B,INSIG1,LSS,MVD,MVK,PBX1,POR,MSMO1,SC5D,SNAI1,SQLE,SREBF1,STAR,TM7SF2,CACNA1H,C14orf1,SCAP,NSDHL,HSD17B11,HSD17B14,HSD17B7,CYB5R1,WNT4,SRD5A3
1_Member	GO Biological Processes	GO:0008202	steroid metabolic process	-8.94806	-6.387	56/291	19,47,133,341,348,706,847,1593,1595,1645,1717,1718,2055,2232,2539,3156,3157,3290,3422,3490,3553,3638,3949,3953,4041,4047,4597,4598,5087,5447,5641,6095,6307,6309,6615,6713,6720,6721,6770,6777,7108,8542,8912,10577,11161,22937,50814,51170,51171,51478,51706,51741,54361,79644,255738,285440	ABCA1,ACLY,ADM,APOC1,APOE,TSPO,CAT,CYP27A1,CYP51A1,AKR1C1,DHCR7,DHCR24,CLN8,FDXR,G6PD,HMGCR,HMGCS1,HSD11B1,IDI1,IGFBP7,IL1B,INSIG1,LDLR,LEPR,LRP5,LSS,MVD,MVK,PBX1,POR,LGMN,RORA,MSMO1,SC5D,SNAI1,SQLE,SREBF1,SREBF2,STAR,STAT5B,TM7SF2,APOL1,CACNA1H,NPC2,C14orf1,SCAP,NSDHL,HSD17B11,HSD17B14,HSD17B7,CYB5R1,WWOX,WNT4,SRD5A3,PCSK9,CYP4V2
1_Member	GO Biological Processes	GO:0046165	alcohol biosynthetic process	-8.63367	-6.099	29/104	47,348,1595,1717,1718,2185,2539,2629,3156,3157,3422,3553,3613,3638,4047,4597,4598,5447,6307,6309,6713,6720,7108,11161,22937,50814,51477,51478,340485	ACLY,APOE,CYP51A1,DHCR7,DHCR24,PTK2B,G6PD,GBA,HMGCR,HMGCS1,IDI1,IL1B,IMPA2,INSIG1,LSS,MVD,MVK,POR,MSMO1,SC5D,SQLE,SREBF1,TM7SF2,C14orf1,SCAP,NSDHL,ISYNA1,HSD17B7,ACER2
1_Member	Reactome Gene Sets	R-HSA-2426168	Activation of gene expression by SREBF (SREBP)	-8.00299	-5.515	17/42	1595,1717,2194,3156,3157,3422,4047,4597,4598,5465,6309,6319,6713,6720,6721,6907,7108	CYP51A1,DHCR7,FASN,HMGCR,HMGCS1,IDI1,LSS,MVD,MVK,PPARA,SC5D,SCD,SQLE,SREBF1,SREBF2,TBL1X,TM7SF2
1_Member	Reactome Gene Sets	R-HSA-1655829	Regulation of cholesterol biosynthesis by SREBP (SREBF)	-7.53072	-5.143	19/55	1595,1717,2194,3156,3157,3422,3638,4047,4597,4598,5465,6309,6319,6713,6720,6721,6907,7108,22937	CYP51A1,DHCR7,FASN,HMGCR,HMGCS1,IDI1,INSIG1,LSS,MVD,MVK,PPARA,SC5D,SCD,SQLE,SREBF1,SREBF2,TBL1X,TM7SF2,SCAP
1_Member	GO Biological Processes	GO:1901617	organic hydroxy compound biosynthetic process	-7.40295	-5.035	41/202	47,348,1497,1593,1595,1717,1718,2185,2539,2629,3156,3157,3422,3553,3613,3638,4047,4597,4598,4929,5360,5447,6307,6309,6615,6713,6720,6770,7108,7474,8864,8912,9464,11161,22937,50814,51477,51478,51706,54361,340485	ACLY,APOE,CTNS,CYP27A1,CYP51A1,DHCR7,DHCR24,PTK2B,G6PD,GBA,HMGCR,HMGCS1,IDI1,IL1B,IMPA2,INSIG1,LSS,MVD,MVK,NR4A2,PLTP,POR,MSMO1,SC5D,SNAI1,SQLE,SREBF1,STAR,TM7SF2,WNT5A,PER2,CACNA1H,HAND2,C14orf1,SCAP,NSDHL,ISYNA1,HSD17B7,CYB5R1,WNT4,ACER2
1_Member	Hallmark Gene Sets	M5924	HALLMARK MTORC1 SIGNALING	-5.2959	-3.317	36/200	47,1026,1491,1595,1717,1718,2232,2539,2632,2745,2936,3156,3157,3417,3422,3638,3949,3992,4783,5641,6184,6309,6319,6503,6713,7108,7296,7832,8503,8878,9415,10437,23657,26471,27346,54541	ACLY,CDKN1A,CTH,CYP51A1,DHCR7,DHCR24,FDXR,G6PD,GBE1,GLRX,GSR,HMGCR,HMGCS1,IDH1,IDI1,INSIG1,LDLR,FADS1,NFIL3,LGMN,RPN1,SC5D,SCD,SLA,SQLE,TM7SF2,TXNRD1,BTG2,PIK3R3,SQSTM1,FADS2,IFI30,SLC7A11,NUPR1,TMEM97,DDIT4
2_Summary	KEGG Pathway	ko04142	Lysosome	-16.4101	-12.636	43/123	20,53,54,410,427,535,1200,1201,1203,1497,1509,1513,1777,2517,2548,2581,2629,2720,2760,2799,3073,3425,4126,4669,4758,4891,5476,5538,5641,5660,6272,6448,8722,8906,9516,10239,10577,22901,26503,51172,55353,57192,285362,221,224,414,415,1390,2055,2583,8398,8611,8613,10924,26301,27315,51227,53947,54344,54872,55650,57488,57515,65258,79690,80235,93210,94005,94103,253782,340485,347735,25870,79411	ABCA2,ACP2,ACP5,ARSA,ASAH1,ATP6V0A1,TPP1,CLN3,CLN5,CTNS,CTSD,CTSK,DNASE2,FUCA1,GAA,GALC,GBA,GLB1,GM2A,GNS,HEXA,IDUA,MANBA,NAGLU,NEU1,SLC11A2,CTSA,PPT1,LGMN,PSAP,SORT1,SGSH,CTSF,AP1G2,LITAF,AP3S2,NPC2,ARSG,SLC17A5,NAGPA,LAPTM4B,MCOLN1,SUMF1,ALDH3B1,ALDH3A2,ARSD,ARSE,CREM,CLN8,B4GALNT1,PLA2G6,PLPP1,PLPP3,SMPDL3A,GBGT1,PGAP2,PIGP,A4GALT,DPM3,PIGG,PIGV,ESYT2,SERINC1,MPPE1,GAL3ST4,PIGZ,PGAP3,PIGS,ORMD…
2_Member	KEGG Pathway	ko04142	Lysosome	-16.4101	-12.636	43/123	20,53,54,410,427,535,1200,1201,1203,1497,1509,1513,1777,2517,2548,2581,2629,2720,2760,2799,3073,3425,4126,4669,4758,4891,5476,5538,5641,5660,6272,6448,8722,8906,9516,10239,10577,22901,26503,51172,55353,57192,285362	ABCA2,ACP2,ACP5,ARSA,ASAH1,ATP6V0A1,TPP1,CLN3,CLN5,CTNS,CTSD,CTSK,DNASE2,FUCA1,GAA,GALC,GBA,GLB1,GM2A,GNS,HEXA,IDUA,MANBA,NAGLU,NEU1,SLC11A2,CTSA,PPT1,LGMN,PSAP,SORT1,SGSH,CTSF,AP1G2,LITAF,AP3S2,NPC2,ARSG,SLC17A5,NAGPA,LAPTM4B,MCOLN1,SUMF1
2_Member	KEGG Pathway	hsa04142	Lysosome	-16.4101	-12.636	43/123	20,53,54,410,427,535,1200,1201,1203,1497,1509,1513,1777,2517,2548,2581,2629,2720,2760,2799,3073,3425,4126,4669,4758,4891,5476,5538,5641,5660,6272,6448,8722,8906,9516,10239,10577,22901,26503,51172,55353,57192,285362	ABCA2,ACP2,ACP5,ARSA,ASAH1,ATP6V0A1,TPP1,CLN3,CLN5,CTNS,CTSD,CTSK,DNASE2,FUCA1,GAA,GALC,GBA,GLB1,GM2A,GNS,HEXA,IDUA,MANBA,NAGLU,NEU1,SLC11A2,CTSA,PPT1,LGMN,PSAP,SORT1,SGSH,CTSF,AP1G2,LITAF,AP3S2,NPC2,ARSG,SLC17A5,NAGPA,LAPTM4B,MCOLN1,SUMF1
2_Member	GO Biological Processes	GO:0006643	membrane lipid metabolic process	-8.8736	-6.322	43/195	221,224,410,414,415,427,1201,1390,2055,2581,2583,2629,2720,2760,3073,4758,5476,5538,5660,8398,8611,8613,10924,22901,26301,27315,51227,53947,54344,54872,55650,57488,57515,65258,79690,80235,93210,94005,94103,253782,285362,340485,347735	ALDH3B1,ALDH3A2,ARSA,ARSD,ARSE,ASAH1,CLN3,CREM,CLN8,GALC,B4GALNT1,GBA,GLB1,GM2A,HEXA,NEU1,CTSA,PPT1,PSAP,PLA2G6,PLPP1,PLPP3,SMPDL3A,ARSG,GBGT1,PGAP2,PIGP,A4GALT,DPM3,PIGG,PIGV,ESYT2,SERINC1,MPPE1,GAL3ST4,PIGZ,PGAP3,PIGS,ORMDL3,CERS6,SUMF1,ACER2,SERINC2
2_Member	Reactome Gene Sets	R-HSA-1660662	Glycosphingolipid metabolism	-8.3389	-5.82	18/45	410,414,415,427,2581,2583,2629,2720,2760,3073,4758,5476,5660,22901,25870,57488,79411,285362	ARSA,ARSD,ARSE,ASAH1,GALC,B4GALNT1,GBA,GLB1,GM2A,HEXA,NEU1,CTSA,PSAP,ARSG,SUMF2,ESYT2,GLB1L,SUMF1
2_Member	GO Biological Processes	GO:0006664	glycolipid metabolic process	-8.1596	-5.649	30/115	410,414,415,427,1201,1390,2581,2583,2629,2720,2760,3073,4758,5476,5660,22901,26301,27315,51227,53947,54344,54872,55650,57488,65258,79690,80235,93210,94005,285362	ARSA,ARSD,ARSE,ASAH1,CLN3,CREM,GALC,B4GALNT1,GBA,GLB1,GM2A,HEXA,NEU1,CTSA,PSAP,ARSG,GBGT1,PGAP2,PIGP,A4GALT,DPM3,PIGG,PIGV,ESYT2,MPPE1,GAL3ST4,PIGZ,PGAP3,PIGS,SUMF1
2_Member	GO Biological Processes	GO:1903509	liposaccharide metabolic process	-7.97069	-5.491	30/117	410,414,415,427,1201,1390,2581,2583,2629,2720,2760,3073,4758,5476,5660,22901,26301,27315,51227,53947,54344,54872,55650,57488,65258,79690,80235,93210,94005,285362	ARSA,ARSD,ARSE,ASAH1,CLN3,CREM,GALC,B4GALNT1,GBA,GLB1,GM2A,HEXA,NEU1,CTSA,PSAP,ARSG,GBGT1,PGAP2,PIGP,A4GALT,DPM3,PIGG,PIGV,ESYT2,MPPE1,GAL3ST4,PIGZ,PGAP3,PIGS,SUMF1
2_Member	Reactome Gene Sets	R-HSA-428157	Sphingolipid metabolism	-7.7153	-5.303	25/88	221,224,410,414,415,427,2581,2583,2629,2720,2760,3073,4758,5476,5660,8611,8613,22901,25870,57488,79411,94103,253782,285362,340485	ALDH3B1,ALDH3A2,ARSA,ARSD,ARSE,ASAH1,GALC,B4GALNT1,GBA,GLB1,GM2A,HEXA,NEU1,CTSA,PSAP,PLPP1,PLPP3,ARSG,SUMF2,ESYT2,GLB1L,ORMDL3,CERS6,SUMF1,ACER2
2_Member	GO Biological Processes	GO:0006665	sphingolipid metabolic process	-6.9372	-4.658	32/143	221,224,410,414,415,427,1201,1390,2055,2581,2583,2629,2720,2760,3073,4758,5476,5538,5660,8398,8611,8613,10924,22901,53947,57488,57515,94103,253782,285362,340485,347735	ALDH3B1,ALDH3A2,ARSA,ARSD,ARSE,ASAH1,CLN3,CREM,CLN8,GALC,B4GALNT1,GBA,GLB1,GM2A,HEXA,NEU1,CTSA,PPT1,PSAP,PLA2G6,PLPP1,PLPP3,SMPDL3A,ARSG,A4GALT,ESYT2,SERINC1,ORMDL3,CERS6,SUMF1,ACER2,SERINC2
2_Member	GO Biological Processes	GO:0006687	glycosphingolipid metabolic process	-6.118	-3.967	19/66	410,414,415,427,1201,1390,2581,2583,2629,2720,2760,3073,4758,5476,5660,22901,53947,57488,285362	ARSA,ARSD,ARSE,ASAH1,CLN3,CREM,GALC,B4GALNT1,GBA,GLB1,GM2A,HEXA,NEU1,CTSA,PSAP,ARSG,A4GALT,ESYT2,SUMF1
2_Member	KEGG Pathway	hsa00600	Sphingolipid metabolism	-2.40266	-1.111	17441	410,427,2581,2629,2720,4758,8611,8613,253782,340485	ARSA,ASAH1,GALC,GBA,GLB1,NEU1,PLPP1,PLPP3,CERS6,ACER2
2_Member	KEGG Pathway	ko00600	Sphingolipid metabolism	-2.40266	-1.111	17441	410,427,2581,2629,2720,4758,8611,8613,253782,340485	ARSA,ASAH1,GALC,GBA,GLB1,NEU1,PLPP1,PLPP3,CERS6,ACER2
3_Summary	GO Biological Processes	GO:0008610	lipid biosynthetic process	-15.5581	-11.975	117/654	47,133,220,221,224,283,341,348,706,1120,1593,1595,1717,1718,2055,2170,2194,2232,2252,2254,2539,2549,2583,2629,2710,3156,3157,3290,3357,3417,3422,3490,3553,3638,3667,3949,3992,4047,4597,4598,5087,5166,5191,5287,5295,5337,5359,5447,5565,5730,5742,5833,6307,6309,6319,6615,6713,6720,6770,7108,8398,8503,8526,8611,8613,8660,8760,8912,9415,9600,10062,10162,10423,10554,10580,10826,11161,22937,23175,23417…	ACLY,ADM,ALDH1A3,ALDH3B1,ALDH3A2,ANG,APOC1,APOE,TSPO,CHKB,CYP27A1,CYP51A1,DHCR7,DHCR24,CLN8,FABP3,FASN,FDXR,FGF7,FGF9,G6PD,GAB1,B4GALNT1,GBA,GK,HMGCR,HMGCS1,HSD11B1,HTR2B,IDH1,IDI1,IGFBP7,IL1B,INSIG1,IRS1,LDLR,FADS1,LSS,MVD,MVK,PBX1,PDK4,PEX7,PIK3C2B,PIK3R1,PLD1,PLSCR1,POR,PRKAB2,PTGDS,PTGS1,PCYT2,MSMO1,SC5D,SCD,SNAI1,SQLE,SREBF1,STAR,TM7SF2,PLA2G6,PIK3R3,DGKE,PLPP1,PLPP3,IRS2,CDS2,CACNA1H,FADS2,…
3_Member	GO Biological Processes	GO:0008610	lipid biosynthetic process	-15.5581	-11.975	117/654	47,133,220,221,224,283,341,348,706,1120,1593,1595,1717,1718,2055,2170,2194,2232,2252,2254,2539,2549,2583,2629,2710,3156,3157,3290,3357,3417,3422,3490,3553,3638,3667,3949,3992,4047,4597,4598,5087,5166,5191,5287,5295,5337,5359,5447,5565,5730,5742,5833,6307,6309,6319,6615,6713,6720,6770,7108,8398,8503,8526,8611,8613,8660,8760,8912,9415,9600,10062,10162,10423,10554,10580,10826,11161,22937,23175,23417…	ACLY,ADM,ALDH1A3,ALDH3B1,ALDH3A2,ANG,APOC1,APOE,TSPO,CHKB,CYP27A1,CYP51A1,DHCR7,DHCR24,CLN8,FABP3,FASN,FDXR,FGF7,FGF9,G6PD,GAB1,B4GALNT1,GBA,GK,HMGCR,HMGCS1,HSD11B1,HTR2B,IDH1,IDI1,IGFBP7,IL1B,INSIG1,IRS1,LDLR,FADS1,LSS,MVD,MVK,PBX1,PDK4,PEX7,PIK3C2B,PIK3R1,PLD1,PLSCR1,POR,PRKAB2,PTGDS,PTGS1,PCYT2,MSMO1,SC5D,SCD,SNAI1,SQLE,SREBF1,STAR,TM7SF2,PLA2G6,PIK3R3,DGKE,PLPP1,PLPP3,IRS2,CDS2,CACNA1H,FADS2,…
3_Member	Reactome Gene Sets	R-HSA-556833	Metabolism of lipids and lipoproteins	-14.6633	-11.257	133/807	19,35,47,123,221,224,341,348,410,414,415,427,948,1081,1120,1593,1595,1632,1645,1717,1718,2170,2194,2232,2534,2581,2583,2629,2678,2710,2720,2760,2879,3073,3156,3157,3290,3417,3422,3638,3949,3992,4047,4597,4598,4758,4862,5287,5295,5337,5360,5445,5465,5468,5476,5500,5538,5565,5660,5730,5742,5833,6095,6307,6309,6319,6713,6720,6721,6770,6907,7108,7296,8398,8503,8611,8613,8714,8760,8800,9261,9415,9600,…	ABCA1,ACADS,ACLY,PLIN2,ALDH3B1,ALDH3A2,APOC1,APOE,ARSA,ARSD,ARSE,ASAH1,CD36,CGA,CHKB,CYP27A1,CYP51A1,ECI1,AKR1C1,DHCR7,DHCR24,FABP3,FASN,FDXR,FYN,GALC,B4GALNT1,GBA,GGT1,GK,GLB1,GM2A,GPX4,HEXA,HMGCR,HMGCS1,HSD11B1,IDH1,IDI1,INSIG1,LDLR,FADS1,LSS,MVD,MVK,NEU1,NPAS2,PIK3C2B,PIK3R1,PLD1,PLTP,PON2,PPARA,PPARG,CTSA,PPP1CB,PPT1,PRKAB2,PSAP,PTGDS,PTGS1,PCYT2,RORA,MSMO1,SC5D,SCD,SQLE,SREBF1,SREBF2,STAR,TB…
3_Member	GO Biological Processes	GO:0006644	phospholipid metabolic process	-9.1446	-6.547	76/449	341,1120,1201,2055,2064,2065,2170,2185,2252,2254,2534,2549,2879,3082,3357,3417,3422,3613,3667,3949,3992,4254,4597,4598,5156,5159,5287,5295,5337,5359,5833,8398,8503,8526,8611,8613,8660,8760,9314,9600,10162,10423,10554,10924,23175,23446,23761,26090,26751,27315,51227,51477,54344,54872,55650,57515,63874,64748,64900,65258,79143,79644,79888,80235,84513,84812,93210,94005,113791,114884,129303,153090,2222…	APOC1,CHKB,CLN3,CLN8,ERBB2,ERBB3,FABP3,PTK2B,FGF7,FGF9,FYN,GAB1,GPX4,HGF,HTR2B,IDH1,IDI1,IMPA2,IRS1,LDLR,FADS1,KITLG,MVD,MVK,PDGFRA,PDGFRB,PIK3C2B,PIK3R1,PLD1,PLSCR1,PCYT2,PLA2G6,PIK3R3,DGKE,PLPP1,PLPP3,IRS2,CDS2,KLF4,PITPNM1,LPCAT3,CDIPT,AGPAT1,SMPDL3A,LPIN1,SLC44A1,PISD,ABHD12,SH3YL1,PGAP2,PIGP,ISYNA1,DPM3,PIGG,PIGV,SERINC1,ABHD4,PLPPR2,LPIN3,MPPE1,MBOAT7,SRD5A3,LPCAT1,PIGZ,PLPP5,PLCD4,PGAP3,PI…
3_Member	GO Biological Processes	GO:0046486	glycerolipid metabolic process	-6.02313	-3.896	65/431	283,341,348,847,1120,1373,2064,2065,2170,2252,2254,2534,2549,2710,3082,3357,3613,3638,3667,3949,4254,5156,5159,5287,5295,5337,5359,5833,6720,8398,8503,8660,8760,9600,10062,10162,10423,10554,23175,23446,26090,26751,27315,51227,54344,54872,55650,57104,57515,63874,64900,65258,79143,79888,80235,80339,84812,93210,94005,114884,129303,150094,255738,347735,376497	ANG,APOC1,APOE,CAT,CHKB,CPS1,ERBB2,ERBB3,FABP3,FGF7,FGF9,FYN,GAB1,GK,HGF,HTR2B,IMPA2,INSIG1,IRS1,LDLR,KITLG,PDGFRA,PDGFRB,PIK3C2B,PIK3R1,PLD1,PLSCR1,PCYT2,SREBF1,PLA2G6,PIK3R3,IRS2,CDS2,PITPNM1,NR1H3,LPCAT3,CDIPT,AGPAT1,LPIN1,SLC44A1,ABHD12,SH3YL1,PGAP2,PIGP,DPM3,PIGG,PIGV,PNPLA2,SERINC1,ABHD4,LPIN3,MPPE1,MBOAT7,LPCAT1,PIGZ,PNPLA3,PLCD4,PGAP3,PIGS,OSBPL10,TMEM150A,SIK1,PCSK9,SERINC2,SLC27A1
3_Member	GO Biological Processes	GO:0008654	phospholipid biosynthetic process	-5.74379	-3.669	46/273	1120,2170,2252,2254,2549,3357,3417,3422,3667,3992,4597,4598,5287,5295,5337,5359,5833,8398,8503,8526,8660,8760,9600,10162,10423,10554,23175,23446,23761,26751,27315,51227,51477,54344,54872,55650,57515,64900,65258,79143,79644,79888,80235,93210,94005,376497	CHKB,FABP3,FGF7,FGF9,GAB1,HTR2B,IDH1,IDI1,IRS1,FADS1,MVD,MVK,PIK3C2B,PIK3R1,PLD1,PLSCR1,PCYT2,PLA2G6,PIK3R3,DGKE,IRS2,CDS2,PITPNM1,LPCAT3,CDIPT,AGPAT1,LPIN1,SLC44A1,PISD,SH3YL1,PGAP2,PIGP,ISYNA1,DPM3,PIGG,PIGV,SERINC1,LPIN3,MPPE1,MBOAT7,SRD5A3,LPCAT1,PIGZ,PGAP3,PIGS,SLC27A1
3_Member	GO Biological Processes	GO:0090407	organophosphate biosynthetic process	-5.50134	-3.481	85/633	19,112,133,348,535,1120,1373,1902,1909,2170,2185,2252,2254,2539,2549,2710,2771,2774,3351,3357,3417,3422,3667,3992,4597,4598,4832,4837,4882,4883,5287,5295,5337,5359,5833,6774,7466,8398,8503,8526,8660,8760,8942,9472,9590,9600,10162,10203,10267,10423,10554,23057,23175,23446,23475,23761,26751,27315,50484,51227,51477,54344,54872,54956,54981,55022,55650,55739,57211,57515,64900,65258,79143,79644,79888,8…	ABCA1,ADCY6,ADM,APOE,ATP6V0A1,CHKB,CPS1,LPAR1,EDNRA,FABP3,PTK2B,FGF7,FGF9,G6PD,GAB1,GK,GNAI2,GNAL,HTR1B,HTR2B,IDH1,IDI1,IRS1,FADS1,MVD,MVK,NME3,NNMT,NPR2,NPR3,PIK3C2B,PIK3R1,PLD1,PLSCR1,PCYT2,STAT3,WFS1,PLA2G6,PIK3R3,DGKE,IRS2,CDS2,KYNU,AKAP6,AKAP12,PITPNM1,LPCAT3,CALCRL,RAMP1,CDIPT,AGPAT1,NMNAT2,LPIN1,SLC44A1,QPRT,PISD,SH3YL1,PGAP2,RRM2B,PIGP,ISYNA1,DPM3,PIGG,PARP16,NMRK1,PID1,PIGV,NAXD,ADGRG6,S…
3_Member	GO Biological Processes	GO:0006650	glycerophospholipid metabolic process	-5.30549	-3.322	53/344	341,1120,2064,2065,2170,2252,2254,2534,2549,3082,3357,3613,3667,3949,4254,5156,5159,5287,5295,5337,5359,5833,8398,8503,8660,8760,9600,10162,10423,10554,23175,23446,26090,26751,27315,51227,54344,54872,55650,57515,63874,64900,65258,79143,79888,80235,84812,93210,94005,114884,129303,347735,376497	APOC1,CHKB,ERBB2,ERBB3,FABP3,FGF7,FGF9,FYN,GAB1,HGF,HTR2B,IMPA2,IRS1,LDLR,KITLG,PDGFRA,PDGFRB,PIK3C2B,PIK3R1,PLD1,PLSCR1,PCYT2,PLA2G6,PIK3R3,IRS2,CDS2,PITPNM1,LPCAT3,CDIPT,AGPAT1,LPIN1,SLC44A1,ABHD12,SH3YL1,PGAP2,PIGP,DPM3,PIGG,PIGV,SERINC1,ABHD4,LPIN3,MPPE1,MBOAT7,LPCAT1,PIGZ,PLCD4,PGAP3,PIGS,OSBPL10,TMEM150A,SERINC2,SLC27A1
3_Member	GO Biological Processes	GO:0045017	glycerolipid biosynthetic process	-4.52863	-2.707	41/259	283,1120,2170,2252,2254,2549,2710,3357,3667,3949,5287,5295,5337,5359,5833,6720,8398,8503,8660,8760,9600,10062,10423,10554,23175,23446,26751,27315,51227,54344,54872,55650,64900,65258,79888,80235,80339,93210,94005,150094,376497	ANG,CHKB,FABP3,FGF7,FGF9,GAB1,GK,HTR2B,IRS1,LDLR,PIK3C2B,PIK3R1,PLD1,PLSCR1,PCYT2,SREBF1,PLA2G6,PIK3R3,IRS2,CDS2,PITPNM1,NR1H3,CDIPT,AGPAT1,LPIN1,SLC44A1,SH3YL1,PGAP2,PIGP,DPM3,PIGG,PIGV,LPIN3,MPPE1,LPCAT1,PIGZ,PNPLA3,PGAP3,PIGS,SIK1,SLC27A1
3_Member	GO Biological Processes	GO:0046488	phosphatidylinositol metabolic process	-3.47981	-1.868	33/216	2064,2065,2252,2254,2534,2549,3082,3357,3613,3667,4254,5156,5159,5287,5295,8503,8660,9600,10423,26751,27315,51227,54344,54872,55650,65258,79143,80235,84812,93210,94005,129303,376497	ERBB2,ERBB3,FGF7,FGF9,FYN,GAB1,HGF,HTR2B,IMPA2,IRS1,KITLG,PDGFRA,PDGFRB,PIK3C2B,PIK3R1,PIK3R3,IRS2,PITPNM1,CDIPT,SH3YL1,PGAP2,PIGP,DPM3,PIGG,PIGV,MPPE1,MBOAT7,PIGZ,PLCD4,PGAP3,PIGS,TMEM150A,SLC27A1
3_Member	GO Biological Processes	GO:0046474	glycerophospholipid biosynthetic process	-3.2295	-1.701	34/232	1120,2170,2252,2254,2549,3357,3667,5287,5295,5337,5359,5833,8398,8503,8660,8760,9600,10423,10554,23175,23446,26751,27315,51227,54344,54872,55650,64900,65258,79888,80235,93210,94005,376497	CHKB,FABP3,FGF7,FGF9,GAB1,HTR2B,IRS1,PIK3C2B,PIK3R1,PLD1,PLSCR1,PCYT2,PLA2G6,PIK3R3,IRS2,CDS2,PITPNM1,CDIPT,AGPAT1,LPIN1,SLC44A1,SH3YL1,PGAP2,PIGP,DPM3,PIGG,PIGV,LPIN3,MPPE1,LPCAT1,PIGZ,PGAP3,PIGS,SLC27A1
3_Member	GO Biological Processes	GO:0006661	phosphatidylinositol biosynthetic process	-2.67445	-1.299	22/140	2252,2254,2549,3357,3667,5287,5295,8503,8660,9600,10423,26751,27315,51227,54344,54872,55650,65258,80235,93210,94005,376497	FGF7,FGF9,GAB1,HTR2B,IRS1,PIK3C2B,PIK3R1,PIK3R3,IRS2,PITPNM1,CDIPT,SH3YL1,PGAP2,PIGP,DPM3,PIGG,PIGV,MPPE1,PIGZ,PGAP3,PIGS,SLC27A1
4_Summary	GO Biological Processes	GO:1901701	cellular response to oxygen-containing compound	-15.5273	-11.975	151/942	19,25,112,388,408,535,610,639,677,687,706,837,842,948,1051,1129,1191,1244,1281,1290,1373,1471,1535,1645,1728,1788,1902,2081,2185,2281,2308,2534,2549,2730,2771,2791,3082,3156,3157,3164,3297,3383,3399,3481,3484,3553,3600,3643,3667,3717,3728,3949,4041,4217,4257,4303,4776,4792,4929,5025,5139,5142,5144,5156,5164,5166,5176,5295,5447,5468,5598,5617,5660,5727,5732,5734,5764,5791,5919,6041,6095,6096,6648,…	ABCA1,ABL1,ADCY6,RHOB,ARRB1,ATP6V0A1,HCN2,PRDM1,ZFP36L1,KLF9,TSPO,CASP4,CASP9,CD36,CEBPB,CHRM2,CLU,ABCC2,COL3A1,COL5A2,CPS1,CST3,CYBA,AKR1C1,NQO1,DNMT3A,LPAR1,ERN1,PTK2B,FKBP1B,FOXO1,FYN,GAB1,GCLM,GNAI2,GNG11,HGF,HMGCR,HMGCS1,NR4A1,HSF1,ICAM1,ID3,IGF2,IGFBP1,IL1B,IL15,INSR,IRS1,JAK2,JUP,LDLR,LRP5,MAP3K5,MGST1,FOXO4,NFATC4,NFKBIA,NR4A2,P2RX4,PDE3A,PDE4B,PDE4D,PDGFRA,PDK2,PDK4,SERPINF1,PIK3R1,POR,P…
4_Member	GO Biological Processes	GO:1901701	cellular response to oxygen-containing compound	-15.5273	-11.975	151/942	19,25,112,388,408,535,610,639,677,687,706,837,842,948,1051,1129,1191,1244,1281,1290,1373,1471,1535,1645,1728,1788,1902,2081,2185,2281,2308,2534,2549,2730,2771,2791,3082,3156,3157,3164,3297,3383,3399,3481,3484,3553,3600,3643,3667,3717,3728,3949,4041,4217,4257,4303,4776,4792,4929,5025,5139,5142,5144,5156,5164,5166,5176,5295,5447,5468,5598,5617,5660,5727,5732,5734,5764,5791,5919,6041,6095,6096,6648,…	ABCA1,ABL1,ADCY6,RHOB,ARRB1,ATP6V0A1,HCN2,PRDM1,ZFP36L1,KLF9,TSPO,CASP4,CASP9,CD36,CEBPB,CHRM2,CLU,ABCC2,COL3A1,COL5A2,CPS1,CST3,CYBA,AKR1C1,NQO1,DNMT3A,LPAR1,ERN1,PTK2B,FKBP1B,FOXO1,FYN,GAB1,GCLM,GNAI2,GNG11,HGF,HMGCR,HMGCS1,NR4A1,HSF1,ICAM1,ID3,IGF2,IGFBP1,IL1B,IL15,INSR,IRS1,JAK2,JUP,LDLR,LRP5,MAP3K5,MGST1,FOXO4,NFATC4,NFKBIA,NR4A2,P2RX4,PDE3A,PDE4B,PDE4D,PDGFRA,PDK2,PDK4,SERPINF1,PIK3R1,POR,P…
4_Member	GO Biological Processes	GO:0009725	response to hormone	-12.5267	-9.276	131/842	20,112,133,178,210,283,409,535,583,585,652,677,687,706,842,847,1026,1244,1373,1408,1535,1616,1645,1655,1718,1843,2170,2185,2308,2534,2549,2629,2697,2730,2791,3157,3164,3176,3297,3351,3383,3417,3481,3484,3490,3553,3643,3667,3717,3727,3953,4041,4192,4303,4929,5066,5069,5164,5166,5176,5187,5241,5295,5447,5465,5468,5547,5617,5732,5734,5764,5791,5919,5972,6041,6095,6096,6272,6387,6696,6720,6750,6770,6…	ABCA2,ADCY6,ADM,AGL,ALAD,ANG,ARRB2,ATP6V0A1,BBS2,BBS4,BMP4,ZFP36L1,KLF9,TSPO,CASP9,CAT,CDKN1A,ABCC2,CPS1,CRY2,CYBA,DAXX,AKR1C1,DDX5,DHCR24,DUSP1,FABP3,PTK2B,FOXO1,FYN,GAB1,GBA,GJA1,GCLM,GNG11,HMGCS1,NR4A1,HNMT,HSF1,HTR1B,ICAM1,IDH1,IGF2,IGFBP1,IGFBP7,IL1B,INSR,IRS1,JAK2,JUND,LEPR,LRP5,MDK,FOXO4,NR4A2,PAM,PAPPA,PDK2,PDK4,SERPINF1,PER1,PGR,PIK3R1,POR,PPARA,PPARG,PRCP,PRL,PTGER2,PTGER4,PTN,PTPRE,RAR…
4_Member	GO Biological Processes	GO:1901698	response to nitrogen compound	-11.8114	-8.734	135/897	18,25,112,133,182,210,535,610,677,706,834,837,847,1026,1051,1129,1244,1281,1290,1373,1535,1616,1788,1843,2170,2185,2308,2534,2549,2562,2697,2730,2771,2791,2946,2947,3157,3164,3176,3297,3351,3383,3481,3484,3553,3643,3667,3717,3727,3728,3764,3775,4041,4217,4257,4258,4303,4524,4792,4837,4929,5025,5139,5142,5144,5164,5166,5187,5295,5447,5465,5468,5617,5764,5791,5919,5972,6041,6272,6387,6506,6720,6750…	ABAT,ABL1,ADCY6,ADM,JAG1,ALAD,ATP6V0A1,HCN2,ZFP36L1,TSPO,CASP1,CASP4,CAT,CDKN1A,CEBPB,CHRM2,ABCC2,COL3A1,COL5A2,CPS1,CYBA,DAXX,DNMT3A,DUSP1,FABP3,PTK2B,FOXO1,FYN,GAB1,GABRB3,GJA1,GCLM,GNAI2,GNG11,GSTM2,GSTM3,HMGCS1,NR4A1,HNMT,HSF1,HTR1B,ICAM1,IGF2,IGFBP1,IL1B,INSR,IRS1,JAK2,JUND,JUP,KCNJ8,KCNK1,LRP5,MAP3K5,MGST1,MGST2,FOXO4,MTHFR,NFKBIA,NNMT,NR4A2,P2RX4,PDE3A,PDE4B,PDE4D,PDK2,PDK4,PER1,PIK3R1,POR…
4_Member	GO Biological Processes	GO:0010243	response to organonitrogen compound	-11.8092	-8.734	123/790	18,25,112,133,182,210,535,610,677,706,834,837,847,1026,1051,1244,1281,1290,1373,1535,1788,1843,2170,2185,2308,2534,2549,2562,2697,2730,2791,2946,3157,3164,3176,3297,3351,3383,3481,3484,3553,3643,3667,3717,3727,3728,3775,4041,4257,4258,4303,4524,4792,4837,4929,5025,5139,5142,5144,5164,5166,5187,5295,5447,5465,5468,5617,5764,5791,5919,5972,6041,6272,6387,6506,6720,6750,6770,6774,6776,6777,7832,8013…	ABAT,ABL1,ADCY6,ADM,JAG1,ALAD,ATP6V0A1,HCN2,ZFP36L1,TSPO,CASP1,CASP4,CAT,CDKN1A,CEBPB,ABCC2,COL3A1,COL5A2,CPS1,CYBA,DNMT3A,DUSP1,FABP3,PTK2B,FOXO1,FYN,GAB1,GABRB3,GJA1,GCLM,GNG11,GSTM2,HMGCS1,NR4A1,HNMT,HSF1,HTR1B,ICAM1,IGF2,IGFBP1,IL1B,INSR,IRS1,JAK2,JUND,JUP,KCNK1,LRP5,MGST1,MGST2,FOXO4,MTHFR,NFKBIA,NNMT,NR4A2,P2RX4,PDE3A,PDE4B,PDE4D,PDK2,PDK4,PER1,PIK3R1,POR,PPARA,PPARG,PRL,PTN,PTPRE,RARRES2,R…
4_Member	GO Biological Processes	GO:0032870	cellular response to hormone stimulus	-10.1196	-7.3	98/614	112,409,535,583,585,652,677,687,842,1244,1373,1408,1535,1616,1645,1655,1843,2308,2534,2549,2730,2791,3157,3164,3297,3383,3481,3484,3490,3553,3643,3667,3717,3727,3953,4303,4929,5164,5166,5176,5187,5241,5295,5447,5465,5468,5547,5617,5732,5734,5791,5919,5972,6041,6095,6096,6720,6750,6770,6774,6776,6777,7025,7068,8013,8503,8611,8651,8660,8912,8992,9759,9882,10062,10424,10580,11031,11214,23175,23189,2…	ADCY6,ARRB2,ATP6V0A1,BBS2,BBS4,BMP4,ZFP36L1,KLF9,CASP9,ABCC2,CPS1,CRY2,CYBA,DAXX,AKR1C1,DDX5,DUSP1,FOXO1,FYN,GAB1,GCLM,GNG11,HMGCS1,NR4A1,HSF1,ICAM1,IGF2,IGFBP1,IGFBP7,IL1B,INSR,IRS1,JAK2,JUND,LEPR,FOXO4,NR4A2,PDK2,PDK4,SERPINF1,PER1,PGR,PIK3R1,POR,PPARA,PPARG,PRCP,PRL,PTGER2,PTGER4,PTPRE,RARRES2,REN,RNASEL,RORA,RORB,SREBF1,SST,STAR,STAT3,STAT5A,STAT5B,NR2F1,THRB,NR4A3,PIK3R3,PLPP1,SOCS1,IRS2,CAC…
4_Member	GO Biological Processes	GO:1901699	cellular response to nitrogen compound	-10.0044	-7.201	92/565	25,112,535,610,677,837,1051,1129,1281,1290,1373,1535,1616,1788,2308,2534,2549,2562,2730,2771,2791,2946,3164,3297,3351,3383,3481,3484,3553,3643,3667,3717,3728,4217,4303,4929,5025,5139,5142,5144,5164,5166,5295,5447,5468,5617,5791,5919,6041,6720,6770,6774,6776,6777,6778,8013,8503,8651,8660,8992,9314,9472,9882,10211,10580,11031,23175,23189,23235,23318,23433,23514,26012,27244,28999,29988,50507,54206,5…	ABL1,ADCY6,ATP6V0A1,HCN2,ZFP36L1,CASP4,CEBPB,CHRM2,COL3A1,COL5A2,CPS1,CYBA,DAXX,DNMT3A,FOXO1,FYN,GAB1,GABRB3,GCLM,GNAI2,GNG11,GSTM2,NR4A1,HSF1,HTR1B,ICAM1,IGF2,IGFBP1,IL1B,INSR,IRS1,JAK2,JUP,MAP3K5,FOXO4,NR4A2,P2RX4,PDE3A,PDE4B,PDE4D,PDK2,PDK4,PIK3R1,POR,PPARG,PRL,PTPRE,RARRES2,RNASEL,SREBF1,STAR,STAT3,STAT5A,STAT5B,STAT6,NR4A3,PIK3R3,SOCS1,IRS2,ATP6V0E1,KLF4,AKAP6,TBC1D4,FLOT1,SORBS1,RAB31,LPIN1…
4_Member	GO Biological Processes	GO:0071417	cellular response to organonitrogen compound	-9.88235	-7.123	82/483	25,112,535,610,677,837,1051,1281,1290,1373,1535,1788,2308,2534,2549,2562,2730,2791,2946,3164,3297,3351,3383,3481,3484,3553,3643,3667,3717,3728,4303,4929,5025,5139,5142,5144,5164,5166,5295,5447,5468,5617,5791,5919,6041,6720,6770,6774,6776,6777,8013,8503,8651,8660,8992,9314,9472,9882,10580,11031,23175,23189,23235,23433,23514,26012,27244,28999,29988,50507,54206,54741,55022,55788,57085,65010,80310,83…	ABL1,ADCY6,ATP6V0A1,HCN2,ZFP36L1,CASP4,CEBPB,COL3A1,COL5A2,CPS1,CYBA,DNMT3A,FOXO1,FYN,GAB1,GABRB3,GCLM,GNG11,GSTM2,NR4A1,HSF1,HTR1B,ICAM1,IGF2,IGFBP1,IL1B,INSR,IRS1,JAK2,JUP,FOXO4,NR4A2,P2RX4,PDE3A,PDE4B,PDE4D,PDK2,PDK4,PIK3R1,POR,PPARG,PRL,PTPRE,RARRES2,RNASEL,SREBF1,STAR,STAT3,STAT5A,STAT5B,NR4A3,PIK3R3,SOCS1,IRS2,ATP6V0E1,KLF4,AKAP6,TBC1D4,SORBS1,RAB31,LPIN1,KANK1,SIK2,RHOQ,SPIDR,NSMF,SESN1,KL…
4_Member	GO Biological Processes	GO:1901652	response to peptide	-9.17356	-6.566	75/440	112,133,182,535,677,837,847,1373,1535,2170,2308,2534,2549,2697,2791,3164,3297,3383,3481,3484,3553,3643,3667,3717,3727,4041,4303,4792,4929,5164,5166,5295,5447,5465,5468,5617,5791,5919,6041,6272,6387,6720,6770,6774,6776,6777,7832,8013,8503,8651,8660,8992,9314,9882,10580,10626,11031,22937,23175,23189,23235,23433,28999,29988,54206,54741,55022,55788,55914,57085,59341,83667,84709,255738,376497	ADCY6,ADM,JAG1,ATP6V0A1,ZFP36L1,CASP4,CAT,CPS1,CYBA,FABP3,FOXO1,FYN,GAB1,GJA1,GNG11,NR4A1,HSF1,ICAM1,IGF2,IGFBP1,IL1B,INSR,IRS1,JAK2,JUND,LRP5,FOXO4,NFKBIA,NR4A2,PDK2,PDK4,PIK3R1,POR,PPARA,PPARG,PRL,PTPRE,RARRES2,RNASEL,SORT1,CXCL12,SREBF1,STAR,STAT3,STAT5A,STAT5B,BTG2,NR4A3,PIK3R3,SOCS1,IRS2,ATP6V0E1,KLF4,TBC1D4,SORBS1,TRIM16,RAB31,SCAP,LPIN1,KANK1,SIK2,RHOQ,KLF15,SLC2A8,ERRFI1,LEPROT,PID1,LMBRD…
4_Member	GO Biological Processes	GO:0043434	response to peptide hormone	-8.9519	-6.387	69/395	112,133,535,677,847,1373,1535,2170,2308,2534,2549,2697,2791,3164,3297,3383,3481,3484,3553,3643,3667,3717,3727,4041,4303,4929,5164,5166,5295,5447,5465,5468,5617,5791,5919,6041,6272,6387,6720,6770,6774,6776,6777,7832,8013,8503,8651,8660,8992,9882,10580,10626,11031,22937,23175,23189,23235,23433,29988,54206,54741,55022,55788,57085,59341,83667,84709,255738,376497	ADCY6,ADM,ATP6V0A1,ZFP36L1,CAT,CPS1,CYBA,FABP3,FOXO1,FYN,GAB1,GJA1,GNG11,NR4A1,HSF1,ICAM1,IGF2,IGFBP1,IL1B,INSR,IRS1,JAK2,JUND,LRP5,FOXO4,NR4A2,PDK2,PDK4,PIK3R1,POR,PPARA,PPARG,PRL,PTPRE,RARRES2,RNASEL,SORT1,CXCL12,SREBF1,STAR,STAT3,STAT5A,STAT5B,BTG2,NR4A3,PIK3R3,SOCS1,IRS2,ATP6V0E1,TBC1D4,SORBS1,TRIM16,RAB31,SCAP,LPIN1,KANK1,SIK2,RHOQ,SLC2A8,ERRFI1,LEPROT,PID1,LMBRD1,AGTRAP,TRPV4,SESN2,MGARP,PC…
4_Member	GO Biological Processes	GO:1901653	cellular response to peptide	-7.81515	-5.37	56/312	112,535,677,837,1373,1535,2308,2534,2549,2791,3164,3297,3481,3484,3553,3643,3667,3717,4303,4929,5164,5166,5295,5447,5468,5617,5791,5919,6041,6720,6770,6774,6776,6777,8013,8503,8651,8660,8992,9314,9882,10580,11031,23175,23189,23235,23433,28999,29988,54206,54741,55022,55788,57085,84709,255738	ADCY6,ATP6V0A1,ZFP36L1,CASP4,CPS1,CYBA,FOXO1,FYN,GAB1,GNG11,NR4A1,HSF1,IGF2,IGFBP1,IL1B,INSR,IRS1,JAK2,FOXO4,NR4A2,PDK2,PDK4,PIK3R1,POR,PPARG,PRL,PTPRE,RARRES2,RNASEL,SREBF1,STAR,STAT3,STAT5A,STAT5B,NR4A3,PIK3R3,SOCS1,IRS2,ATP6V0E1,KLF4,TBC1D4,SORBS1,RAB31,LPIN1,KANK1,SIK2,RHOQ,KLF15,SLC2A8,ERRFI1,LEPROT,PID1,LMBRD1,AGTRAP,MGARP,PCSK9
4_Member	GO Biological Processes	GO:0071375	cellular response to peptide hormone stimulus	-7.60113	-5.208	53/292	112,535,677,1373,1535,2308,2534,2549,2791,3164,3297,3481,3484,3553,3643,3667,3717,4303,4929,5164,5166,5295,5447,5468,5617,5791,5919,6041,6720,6770,6774,6776,6777,8013,8503,8651,8660,8992,9882,10580,11031,23175,23189,23235,23433,29988,54206,54741,55022,55788,57085,84709,255738	ADCY6,ATP6V0A1,ZFP36L1,CPS1,CYBA,FOXO1,FYN,GAB1,GNG11,NR4A1,HSF1,IGF2,IGFBP1,IL1B,INSR,IRS1,JAK2,FOXO4,NR4A2,PDK2,PDK4,PIK3R1,POR,PPARG,PRL,PTPRE,RARRES2,RNASEL,SREBF1,STAR,STAT3,STAT5A,STAT5B,NR4A3,PIK3R3,SOCS1,IRS2,ATP6V0E1,TBC1D4,SORBS1,RAB31,LPIN1,KANK1,SIK2,RHOQ,SLC2A8,ERRFI1,LEPROT,PID1,LMBRD1,AGTRAP,MGARP,PCSK9
4_Member	GO Biological Processes	GO:0007169	transmembrane receptor protein tyrosine kinase signaling pathway	-7.36718	-5.008	96/673	25,152,284,347,535,624,780,868,1012,1435,1535,1634,1945,1947,2043,2059,2064,2065,2185,2202,2252,2254,2308,2534,2549,3082,3481,3484,3487,3553,3643,3667,3672,3717,4303,4485,5156,5159,5164,5166,5295,5327,5617,5641,5791,5793,6272,6383,6453,6503,6720,6774,6776,6777,7422,7474,8027,8503,8651,8660,8992,9052,9261,9451,9846,10252,10479,10580,10628,10636,10817,23189,23213,23235,23385,23433,26999,28514,29988…	ABL1,ADRA2C,ANGPT1,APOD,ATP6V0A1,BDKRB2,DDR1,CBLB,CDH13,CSF1,CYBA,DCN,EFNA4,EFNB1,EPHA4,EPS8,ERBB2,ERBB3,PTK2B,EFEMP1,FGF7,FGF9,FOXO1,FYN,GAB1,HGF,IGF2,IGFBP1,IGFBP4,IL1B,INSR,IRS1,ITGA1,JAK2,FOXO4,MST1,PDGFRA,PDGFRB,PDK2,PDK4,PIK3R1,PLAT,PRL,LGMN,PTPRE,PTPRG,SORT1,SDC2,ITSN1,SLA,SREBF1,STAT3,STAT5A,STAT5B,VEGFA,WNT5A,STAM,PIK3R3,SOCS1,IRS2,ATP6V0E1,GPRC5A,MAPKAPK2,EIF2AK3,GAB2,SPRY1,SLC9A6,SORBS…
4_Member	GO Biological Processes	GO:0032868	response to insulin	-6.81679	-4.57	45/243	133,535,677,847,2170,2308,2549,3383,3481,3484,3553,3643,3667,4303,5164,5166,5295,5465,5468,5791,5919,6041,6272,6720,6770,8503,8651,8660,8992,9882,10580,11031,22937,23175,23189,23235,23433,29988,54206,55022,55788,59341,83667,255738,376497	ADM,ATP6V0A1,ZFP36L1,CAT,FABP3,FOXO1,GAB1,ICAM1,IGF2,IGFBP1,IL1B,INSR,IRS1,FOXO4,PDK2,PDK4,PIK3R1,PPARA,PPARG,PTPRE,RARRES2,RNASEL,SORT1,SREBF1,STAR,PIK3R3,SOCS1,IRS2,ATP6V0E1,TBC1D4,SORBS1,RAB31,SCAP,LPIN1,KANK1,SIK2,RHOQ,SLC2A8,ERRFI1,PID1,LMBRD1,TRPV4,SESN2,PCSK9,SLC27A1
4_Member	GO Biological Processes	GO:0007167	enzyme linked receptor protein signaling pathway	-6.605	-4.375	124/968	25,94,152,284,347,409,535,624,652,780,868,1012,1028,1030,1281,1435,1489,1535,1634,1945,1947,2043,2059,2064,2065,2185,2202,2252,2254,2308,2534,2549,3077,3082,3481,3484,3487,3553,3643,3667,3672,3717,4052,4093,4303,4485,4882,5156,5159,5164,5166,5295,5327,5617,5641,5764,5791,5793,6272,6383,6453,6503,6720,6774,6776,6777,7046,7049,7321,7422,7474,8027,8503,8651,8660,8992,9052,9261,9451,9518,9846,10076,1…	ABL1,ACVRL1,ADRA2C,ANGPT1,APOD,ARRB2,ATP6V0A1,BDKRB2,BMP4,DDR1,CBLB,CDH13,CDKN1C,CDKN2B,COL3A1,CSF1,CTF1,CYBA,DCN,EFNA4,EFNB1,EPHA4,EPS8,ERBB2,ERBB3,PTK2B,EFEMP1,FGF7,FGF9,FOXO1,FYN,GAB1,HFE,HGF,IGF2,IGFBP1,IGFBP4,IL1B,INSR,IRS1,ITGA1,JAK2,LTBP1,SMAD9,FOXO4,MST1,NPR2,PDGFRA,PDGFRB,PDK2,PDK4,PIK3R1,PLAT,PRL,LGMN,PTN,PTPRE,PTPRG,SORT1,SDC2,ITSN1,SLA,SREBF1,STAT3,STAT5A,STAT5B,TGFBR1,TGFBR3,UBE2D1,V…
4_Member	GO Biological Processes	GO:0032869	cellular response to insulin stimulus	-5.3994	-3.404	35/190	535,677,2308,2549,3481,3484,3553,3643,3667,4303,5164,5166,5295,5468,5791,5919,6041,6720,6770,8503,8651,8660,8992,9882,10580,11031,23175,23189,23235,23433,29988,54206,55022,55788,255738	ATP6V0A1,ZFP36L1,FOXO1,GAB1,IGF2,IGFBP1,IL1B,INSR,IRS1,FOXO4,PDK2,PDK4,PIK3R1,PPARG,PTPRE,RARRES2,RNASEL,SREBF1,STAR,PIK3R3,SOCS1,IRS2,ATP6V0E1,TBC1D4,SORBS1,RAB31,LPIN1,KANK1,SIK2,RHOQ,SLC2A8,ERRFI1,PID1,LMBRD1,PCSK9
4_Member	GO Biological Processes	GO:0008286	insulin receptor signaling pathway	-5.04894	-3.12	25/119	535,2308,2549,3481,3484,3553,3643,3667,4303,5164,5166,5295,5791,6720,8503,8651,8660,8992,10580,23189,23235,23433,29988,55022,55788	ATP6V0A1,FOXO1,GAB1,IGF2,IGFBP1,IL1B,INSR,IRS1,FOXO4,PDK2,PDK4,PIK3R1,PTPRE,SREBF1,PIK3R3,SOCS1,IRS2,ATP6V0E1,SORBS1,KANK1,SIK2,RHOQ,SLC2A8,PID1,LMBRD1
5_Summary	Hallmark Gene Sets	M5911	HALLMARK INTERFERON ALPHA RESPONSE	-14.7942	-11.321	36/97	716,834,1267,1435,3107,3429,3430,3600,3665,3669,3959,4061,4599,5359,6773,6890,7318,8519,9246,10161,10379,10410,10437,10561,10581,10628,10964,54625,55008,55281,55603,64135,81894,83666,94240,135112,694,710,715,837,1026,3105,3106,3383,3717,4792,4939,5142,5699,6398,6648,6774,6775,6892,7127,8651,10791,80830,84159	C1S,CASP1,CNP,CSF1,HLA-C,IFI27,IFI35,IL15,IRF7,ISG20,LGALS3BP,LY6E,MX1,PLSCR1,STAT2,TAP1,UBA7,IFITM1,UBE2L6,LPAR6,IRF9,IFITM3,IFI30,IFI44,IFITM2,TXNIP,IFI44L,PARP14,HERC6,TMEM140,FAM46A,IFIH1,SLC25A28,PARP9,EPSTI1,NCOA7,BTG1,SERPING1,C1R,CASP4,CDKN1A,HLA-A,HLA-B,ICAM1,JAK2,NFKBIA,OAS2,PDE4B,PSMB10,SECTM1,SOD2,STAT3,STAT4,TAPBP,TNFAIP2,SOCS1,VAMP5,APOL6,ARID5B
5_Member	Hallmark Gene Sets	M5911	HALLMARK INTERFERON ALPHA RESPONSE	-14.7942	-11.321	36/97	716,834,1267,1435,3107,3429,3430,3600,3665,3669,3959,4061,4599,5359,6773,6890,7318,8519,9246,10161,10379,10410,10437,10561,10581,10628,10964,54625,55008,55281,55603,64135,81894,83666,94240,135112	C1S,CASP1,CNP,CSF1,HLA-C,IFI27,IFI35,IL15,IRF7,ISG20,LGALS3BP,LY6E,MX1,PLSCR1,STAT2,TAP1,UBA7,IFITM1,UBE2L6,LPAR6,IRF9,IFITM3,IFI30,IFI44,IFITM2,TXNIP,IFI44L,PARP14,HERC6,TMEM140,FAM46A,IFIH1,SLC25A28,PARP9,EPSTI1,NCOA7
5_Member	Hallmark Gene Sets	M5913	HALLMARK INTERFERON GAMMA RESPONSE	-11.7769	-8.73	49/200	694,710,715,716,834,837,1026,3105,3106,3383,3429,3430,3600,3665,3669,3717,3959,4061,4599,4792,4939,5142,5359,5699,6398,6648,6773,6774,6775,6890,6892,7127,8651,9246,10379,10410,10437,10561,10581,10628,10791,10964,54625,55008,64135,80830,81894,84159,94240	BTG1,SERPING1,C1R,C1S,CASP1,CASP4,CDKN1A,HLA-A,HLA-B,ICAM1,IFI27,IFI35,IL15,IRF7,ISG20,JAK2,LGALS3BP,LY6E,MX1,NFKBIA,OAS2,PDE4B,PLSCR1,PSMB10,SECTM1,SOD2,STAT2,STAT3,STAT4,TAP1,TAPBP,TNFAIP2,SOCS1,UBE2L6,IRF9,IFITM3,IFI30,IFI44,IFITM2,TXNIP,VAMP5,IFI44L,PARP14,HERC6,IFIH1,APOL6,SLC25A28,ARID5B,EPSTI1
6_Summary	GO Biological Processes	GO:0006790	sulfur compound metabolic process	-13.8459	-10.498	77/371	47,284,1244,1373,1491,1497,1634,1737,2194,2539,2678,2686,2720,2730,2799,2936,2941,2946,2947,2948,3073,3417,3425,4060,4257,4258,4524,4597,4598,5091,5164,5166,5538,6319,6448,6776,6777,6821,8460,8942,9394,9435,10090,10157,10678,10965,11046,22901,23213,23382,23417,23479,23743,25874,26229,50507,51380,51449,54480,55501,55790,55856,55902,56548,60386,78991,79094,79586,79690,81689,84532,84693,92126,92370,…	ACLY,ANGPT1,ABCC2,CPS1,CTH,CTNS,DCN,DLAT,FASN,G6PD,GGT1,GGT7,GLB1,GCLM,GNS,GSR,GSTA4,GSTM2,GSTM3,GSTM4,HEXA,IDH1,IDUA,LUM,MGST1,MGST2,MTHFR,MVD,MVK,PC,PDK2,PDK4,PPT1,SCD,SGSH,STAT5A,STAT5B,SUOX,TPST1,KYNU,HS6ST1,CHST2,UST,AASS,B3GNT2,ACOT2,SLC35D2,ARSG,SULF1,AHCYL2,MLYCD,ISCU,BHMT2,MPC2,B3GAT3,NOX4,CSAD,PCYOX1,CHPF2,CHST12,CSGALNACT1,ACOT13,ACSS2,CHST7,SLC25A19,PCYOX1L,CHAC1,CHPF,GAL3ST4,ISCA1,AC…
6_Member	GO Biological Processes	GO:0006790	sulfur compound metabolic process	-13.8459	-10.498	77/371	47,284,1244,1373,1491,1497,1634,1737,2194,2539,2678,2686,2720,2730,2799,2936,2941,2946,2947,2948,3073,3417,3425,4060,4257,4258,4524,4597,4598,5091,5164,5166,5538,6319,6448,6776,6777,6821,8460,8942,9394,9435,10090,10157,10678,10965,11046,22901,23213,23382,23417,23479,23743,25874,26229,50507,51380,51449,54480,55501,55790,55856,55902,56548,60386,78991,79094,79586,79690,81689,84532,84693,92126,92370,…	ACLY,ANGPT1,ABCC2,CPS1,CTH,CTNS,DCN,DLAT,FASN,G6PD,GGT1,GGT7,GLB1,GCLM,GNS,GSR,GSTA4,GSTM2,GSTM3,GSTM4,HEXA,IDH1,IDUA,LUM,MGST1,MGST2,MTHFR,MVD,MVK,PC,PDK2,PDK4,PPT1,SCD,SGSH,STAT5A,STAT5B,SUOX,TPST1,KYNU,HS6ST1,CHST2,UST,AASS,B3GNT2,ACOT2,SLC35D2,ARSG,SULF1,AHCYL2,MLYCD,ISCU,BHMT2,MPC2,B3GAT3,NOX4,CSAD,PCYOX1,CHPF2,CHST12,CSGALNACT1,ACOT13,ACSS2,CHST7,SLC25A19,PCYOX1L,CHAC1,CHPF,GAL3ST4,ISCA1,AC…
6_Member	GO Biological Processes	GO:0044272	sulfur compound biosynthetic process	-7.94333	-5.471	44/216	47,284,1491,1634,1737,2194,2678,2686,2730,2941,2946,2947,2948,4060,4257,4258,5164,5166,5538,6319,9394,9435,10090,10678,10965,11046,23417,23743,25874,26229,51380,54480,55501,55790,55856,55902,56548,79094,79586,84532,92126,92370,373156,641371	ACLY,ANGPT1,CTH,DCN,DLAT,FASN,GGT1,GGT7,GCLM,GSTA4,GSTM2,GSTM3,GSTM4,LUM,MGST1,MGST2,PDK2,PDK4,PPT1,SCD,HS6ST1,CHST2,UST,B3GNT2,ACOT2,SLC35D2,MLYCD,BHMT2,MPC2,B3GAT3,CSAD,CHPF2,CHST12,CSGALNACT1,ACOT13,ACSS2,CHST7,CHAC1,CHPF,ACSS1,DSEL,PXYLP1,GSTK1,ACOT1
6_Member	GO Biological Processes	GO:0006084	acetyl-CoA metabolic process	-6.80778	-4.565	14/34	47,1737,2194,4597,4598,5164,5166,8942,10157,23417,25874,55902,84532,283927	ACLY,DLAT,FASN,MVD,MVK,PDK2,PDK4,KYNU,AASS,MLYCD,MPC2,ACSS2,ACSS1,NUDT7
6_Member	GO Biological Processes	GO:0051186	cofactor metabolic process	-6.57341	-4.352	62/390	47,210,230,683,706,1645,1737,2194,2539,3156,3417,3643,4191,4524,4597,4598,4837,4891,5091,5164,5166,5226,5465,5538,6319,6697,6774,8942,9563,9759,10058,10157,10588,10840,10965,23057,23382,23417,23475,23479,23743,25874,54541,54956,54981,55739,55856,55902,56898,56997,79934,81689,83440,83594,83666,84532,84693,93100,113235,200895,283927,641371	ACLY,ALAD,ALDOC,BST1,TSPO,AKR1C1,DLAT,FASN,G6PD,HMGCR,IDH1,INSR,MDH2,MTHFR,MVD,MVK,NNMT,SLC11A2,PC,PDK2,PDK4,PGD,PPARA,PPT1,SCD,SPR,STAT3,KYNU,H6PD,HDAC4,ABCB6,AASS,MTHFS,ALDH1L1,ACOT2,NMNAT2,AHCYL2,MLYCD,QPRT,ISCU,BHMT2,MPC2,DDIT4,PARP16,NMRK1,NAXD,ACOT13,ACSS2,BDH2,COQ8A,COQ8B,ISCA1,ADPGK,NUDT12,PARP9,ACSS1,MCEE,NAPRT,SLC46A1,DHFR2,NUDT7,ACOT1
6_Member	GO Biological Processes	GO:0006732	coenzyme metabolic process	-6.23079	-4.055	53/321	47,230,683,1737,2194,2539,3156,3417,3643,4191,4524,4597,4598,4837,5164,5166,5226,5465,5538,6319,6697,6774,8942,9563,9759,10157,10588,10840,10965,23057,23382,23417,23475,23743,25874,54541,54956,54981,55739,55856,55902,56997,79934,83440,83594,83666,84532,84693,93100,113235,200895,283927,641371	ACLY,ALDOC,BST1,DLAT,FASN,G6PD,HMGCR,IDH1,INSR,MDH2,MTHFR,MVD,MVK,NNMT,PDK2,PDK4,PGD,PPARA,PPT1,SCD,SPR,STAT3,KYNU,H6PD,HDAC4,AASS,MTHFS,ALDH1L1,ACOT2,NMNAT2,AHCYL2,MLYCD,QPRT,BHMT2,MPC2,DDIT4,PARP16,NMRK1,NAXD,ACOT13,ACSS2,COQ8A,COQ8B,ADPGK,NUDT12,PARP9,ACSS1,MCEE,NAPRT,SLC46A1,DHFR2,NUDT7,ACOT1
6_Member	GO Biological Processes	GO:0051188	cofactor biosynthetic process	-5.55738	-3.524	36/195	47,210,706,1737,2194,4837,4891,5164,5166,5538,6319,6697,8942,10058,10588,10965,23057,23417,23475,23479,25874,54956,54981,55739,55856,55902,56898,56997,79934,81689,83594,83666,84532,93100,200895,641371	ACLY,ALAD,TSPO,DLAT,FASN,NNMT,SLC11A2,PDK2,PDK4,PPT1,SCD,SPR,KYNU,ABCB6,MTHFS,ACOT2,NMNAT2,MLYCD,QPRT,ISCU,MPC2,PARP16,NMRK1,NAXD,ACOT13,ACSS2,BDH2,COQ8A,COQ8B,ISCA1,NUDT12,PARP9,ACSS1,NAPRT,DHFR2,ACOT1
6_Member	GO Biological Processes	GO:0009108	coenzyme biosynthetic process	-4.71864	-2.859	29/155	47,1737,2194,4837,5164,5166,5538,6319,6697,8942,10588,10965,23057,23417,23475,25874,54956,54981,55739,55856,55902,56997,79934,83594,83666,84532,93100,200895,641371	ACLY,DLAT,FASN,NNMT,PDK2,PDK4,PPT1,SCD,SPR,KYNU,MTHFS,ACOT2,NMNAT2,MLYCD,QPRT,MPC2,PARP16,NMRK1,NAXD,ACOT13,ACSS2,COQ8A,COQ8B,NUDT12,PARP9,ACSS1,NAPRT,DHFR2,ACOT1
6_Member	GO Biological Processes	GO:0006085	acetyl-CoA biosynthetic process	-4.00926	-2.287	44044	47,1737,5164,5166,23417,25874,55902,84532	ACLY,DLAT,PDK2,PDK4,MLYCD,MPC2,ACSS2,ACSS1
6_Member	GO Biological Processes	GO:0006637	acyl-CoA metabolic process	-3.98084	-2.268	20/98	47,1737,2194,4597,4598,5164,5166,5538,6319,8942,10157,10965,23417,25874,55856,55902,84532,84693,283927,641371	ACLY,DLAT,FASN,MVD,MVK,PDK2,PDK4,PPT1,SCD,KYNU,AASS,ACOT2,MLYCD,MPC2,ACOT13,ACSS2,ACSS1,MCEE,NUDT7,ACOT1
6_Member	GO Biological Processes	GO:0035383	thioester metabolic process	-3.98084	-2.268	20/98	47,1737,2194,4597,4598,5164,5166,5538,6319,8942,10157,10965,23417,25874,55856,55902,84532,84693,283927,641371	ACLY,DLAT,FASN,MVD,MVK,PDK2,PDK4,PPT1,SCD,KYNU,AASS,ACOT2,MLYCD,MPC2,ACOT13,ACSS2,ACSS1,MCEE,NUDT7,ACOT1
6_Member	GO Biological Processes	GO:0071616	acyl-CoA biosynthetic process	-3.13658	-1.637	14/66	47,1737,2194,5164,5166,5538,6319,10965,23417,25874,55856,55902,84532,641371	ACLY,DLAT,FASN,PDK2,PDK4,PPT1,SCD,ACOT2,MLYCD,MPC2,ACOT13,ACSS2,ACSS1,ACOT1
6_Member	GO Biological Processes	GO:0035384	thioester biosynthetic process	-3.13658	-1.637	14/66	47,1737,2194,5164,5166,5538,6319,10965,23417,25874,55856,55902,84532,641371	ACLY,DLAT,FASN,PDK2,PDK4,PPT1,SCD,ACOT2,MLYCD,MPC2,ACOT13,ACSS2,ACSS1,ACOT1
7_Summary	Hallmark Gene Sets	M5939	HALLMARK P53 PATHWAY	-12.9587	-9.662	51/200	18,677,694,834,1012,1026,1030,1509,2040,2052,2232,2517,2760,2872,3006,3732,4071,4814,5791,5900,6303,6890,6948,7704,7832,8651,8722,9314,10057,10140,10397,10437,10608,10614,10628,23303,23479,23654,23657,26471,26999,27244,29948,51768,54541,54884,55367,56997,57763,63874,64393	ABAT,ZFP36L1,BTG1,CASP1,CDH13,CDKN1A,CDKN2B,CTSD,STOM,EPHX1,FDXR,FUCA1,GM2A,MKNK2,HIST1H1C,CD82,TM4SF1,NINJ1,PTPRE,RALGDS,SAT1,TAP1,TCN2,ZBTB16,BTG2,SOCS1,CTSF,KLF4,ABCC5,TOB1,NDRG1,IFI30,MXD4,HEXIM1,TXNIP,KIF13B,ISCU,PLXNB2,SLC7A11,NUPR1,CYFIP2,SESN1,OSGIN1,TM7SF3,DDIT4,RETSAT,PIDD1,COQ8A,ANKRA2,ABHD4,ZMAT3
7_Member	Hallmark Gene Sets	M5939	HALLMARK P53 PATHWAY	-12.9587	-9.662	51/200	18,677,694,834,1012,1026,1030,1509,2040,2052,2232,2517,2760,2872,3006,3732,4071,4814,5791,5900,6303,6890,6948,7704,7832,8651,8722,9314,10057,10140,10397,10437,10608,10614,10628,23303,23479,23654,23657,26471,26999,27244,29948,51768,54541,54884,55367,56997,57763,63874,64393	ABAT,ZFP36L1,BTG1,CASP1,CDH13,CDKN1A,CDKN2B,CTSD,STOM,EPHX1,FDXR,FUCA1,GM2A,MKNK2,HIST1H1C,CD82,TM4SF1,NINJ1,PTPRE,RALGDS,SAT1,TAP1,TCN2,ZBTB16,BTG2,SOCS1,CTSF,KLF4,ABCC5,TOB1,NDRG1,IFI30,MXD4,HEXIM1,TXNIP,KIF13B,ISCU,PLXNB2,SLC7A11,NUPR1,CYFIP2,SESN1,OSGIN1,TM7SF3,DDIT4,RETSAT,PIDD1,COQ8A,ANKRA2,ABHD4,ZMAT3
8_Summary	GO Biological Processes	GO:0006979	response to oxidative stress	-12.2797	-9.07	78/404	25,210,221,347,348,388,847,948,1244,1471,1535,1718,1728,1843,2034,2055,2185,2281,2308,2539,2549,2629,2730,2878,2879,2882,2936,3082,3297,3417,3717,3840,4217,4257,4929,5156,5159,5164,5445,5598,5660,5742,6648,6649,6770,6778,7225,7295,7296,8013,8692,8989,8996,9314,9973,10516,10550,10628,10636,22921,23135,23657,25824,27244,50484,50507,54929,55074,57332,79661,80149,80310,83667,84557,93100,94241,114757,…	ABL1,ALAD,ALDH3B1,APOD,APOE,RHOB,CAT,CD36,ABCC2,CST3,CYBA,DHCR24,NQO1,DUSP1,EPAS1,CLN8,PTK2B,FKBP1B,FOXO1,G6PD,GAB1,GBA,GCLM,GPX3,GPX4,GPX7,GSR,HGF,HSF1,IDH1,JAK2,KPNA4,MAP3K5,MGST1,NR4A2,PDGFRA,PDGFRB,PDK2,PON2,MAPK7,PSAP,PTGS1,SOD2,SOD3,STAR,STAT6,TRPC6,TXN,TXNRD1,NR4A3,HYAL2,TRPA1,NOL3,KLF4,CCS,FBLN5,ARL6IP5,TXNIP,RGS14,MSRB2,KDM6B,SLC7A11,PRDX5,SESN1,RRM2B,NOX4,TMEM161A,OXR1,CBX8,NEIL1,ZC3H12…
8_Member	GO Biological Processes	GO:0006979	response to oxidative stress	-12.2797	-9.07	78/404	25,210,221,347,348,388,847,948,1244,1471,1535,1718,1728,1843,2034,2055,2185,2281,2308,2539,2549,2629,2730,2878,2879,2882,2936,3082,3297,3417,3717,3840,4217,4257,4929,5156,5159,5164,5445,5598,5660,5742,6648,6649,6770,6778,7225,7295,7296,8013,8692,8989,8996,9314,9973,10516,10550,10628,10636,22921,23135,23657,25824,27244,50484,50507,54929,55074,57332,79661,80149,80310,83667,84557,93100,94241,114757,…	ABL1,ALAD,ALDH3B1,APOD,APOE,RHOB,CAT,CD36,ABCC2,CST3,CYBA,DHCR24,NQO1,DUSP1,EPAS1,CLN8,PTK2B,FKBP1B,FOXO1,G6PD,GAB1,GBA,GCLM,GPX3,GPX4,GPX7,GSR,HGF,HSF1,IDH1,JAK2,KPNA4,MAP3K5,MGST1,NR4A2,PDGFRA,PDGFRB,PDK2,PON2,MAPK7,PSAP,PTGS1,SOD2,SOD3,STAR,STAT6,TRPC6,TXN,TXNRD1,NR4A3,HYAL2,TRPA1,NOL3,KLF4,CCS,FBLN5,ARL6IP5,TXNIP,RGS14,MSRB2,KDM6B,SLC7A11,PRDX5,SESN1,RRM2B,NOX4,TMEM161A,OXR1,CBX8,NEIL1,ZC3H12…
8_Member	GO Biological Processes	GO:0000302	response to reactive oxygen species	-9.58515	-6.853	48/221	25,347,348,388,847,948,1471,1535,1728,1843,2185,2281,2308,2878,2882,2936,3082,3297,3840,4217,5156,5159,5164,5598,5660,6648,6649,6770,6778,7225,7295,7296,8013,8692,8989,9314,9973,10516,10628,23135,25824,27244,50507,57332,80310,83667,84557,120892	ABL1,APOD,APOE,RHOB,CAT,CD36,CST3,CYBA,NQO1,DUSP1,PTK2B,FKBP1B,FOXO1,GPX3,GPX7,GSR,HGF,HSF1,KPNA4,MAP3K5,PDGFRA,PDGFRB,PDK2,MAPK7,PSAP,SOD2,SOD3,STAR,STAT6,TRPC6,TXN,TXNRD1,NR4A3,HYAL2,TRPA1,KLF4,CCS,FBLN5,TXNIP,KDM6B,PRDX5,SESN1,NOX4,CBX8,PDGFD,SESN2,MAP1LC3A,LRRK2
8_Member	GO Biological Processes	GO:0042542	response to hydrogen peroxide	-6.16417	-4.004	28/125	25,388,847,1471,1843,2185,2281,2308,3082,3297,3840,4217,5159,5598,5660,6770,6778,7225,7295,8013,8989,9314,10628,23135,57332,80310,84557,120892	ABL1,RHOB,CAT,CST3,DUSP1,PTK2B,FKBP1B,FOXO1,HGF,HSF1,KPNA4,MAP3K5,PDGFRB,MAPK7,PSAP,STAR,STAT6,TRPC6,TXN,NR4A3,TRPA1,KLF4,TXNIP,KDM6B,CBX8,PDGFD,MAP1LC3A,LRRK2
8_Member	GO Biological Processes	GO:0010035	response to inorganic substance	-6.05803	-3.921	70/475	18,25,210,388,706,842,847,948,955,1244,1373,1471,1528,1616,1728,1788,1843,2185,2281,2308,2539,3077,3082,3157,3297,3383,3707,3727,3840,4217,4776,4891,5066,5159,5176,5598,5660,5727,6648,6649,6770,6778,6786,7225,7295,7296,7474,8013,8912,8989,9314,9451,9973,10235,10397,10516,10628,23135,23514,30061,51596,57332,79085,79800,79901,80149,80310,84557,120892,728294	ABAT,ABL1,ALAD,RHOB,TSPO,CASP9,CAT,CD36,ENTPD6,ABCC2,CPS1,CST3,CYB5A,DAXX,NQO1,DNMT3A,DUSP1,PTK2B,FKBP1B,FOXO1,G6PD,HFE,HGF,HMGCS1,HSF1,ICAM1,ITPKB,JUND,KPNA4,MAP3K5,NFATC4,SLC11A2,PAM,PDGFRB,SERPINF1,MAPK7,PSAP,PTCH1,SOD2,SOD3,STAR,STAT6,STIM1,TRPC6,TXN,TXNRD1,WNT5A,NR4A3,CACNA1H,TRPA1,KLF4,EIF2AK3,CCS,RASGRP2,NDRG1,FBLN5,TXNIP,KDM6B,SPIDR,SLC40A1,CUTA,CBX8,SLC25A23,CARF,CYBRD1,ZC3H12A,PDGFD,MAP…
8_Member	GO Biological Processes	GO:0034599	cellular response to oxidative stress	-5.8325	-3.74	42/238	25,221,388,948,1471,1728,2034,2308,2539,2629,3082,3297,3717,4217,4257,4929,5156,5164,5598,5660,6648,6649,6778,7225,7295,8013,8996,9314,9973,10516,10550,23135,25824,54929,55074,57332,80149,80310,83667,84557,94241,120892	ABL1,ALDH3B1,RHOB,CD36,CST3,NQO1,EPAS1,FOXO1,G6PD,GBA,HGF,HSF1,JAK2,MAP3K5,MGST1,NR4A2,PDGFRA,PDK2,MAPK7,PSAP,SOD2,SOD3,STAT6,TRPC6,TXN,NR4A3,NOL3,KLF4,CCS,FBLN5,ARL6IP5,KDM6B,PRDX5,TMEM161A,OXR1,CBX8,ZC3H12A,PDGFD,SESN2,MAP1LC3A,TP53INP1,LRRK2
8_Member	GO Biological Processes	GO:0034614	cellular response to reactive oxygen species	-5.33132	-3.34	28/137	25,388,948,1471,1728,2308,3082,3297,4217,5156,5164,5598,5660,6648,6649,6778,7225,7295,8013,9314,9973,10516,23135,25824,57332,80310,84557,120892	ABL1,RHOB,CD36,CST3,NQO1,FOXO1,HGF,HSF1,MAP3K5,PDGFRA,PDK2,MAPK7,PSAP,SOD2,SOD3,STAT6,TRPC6,TXN,NR4A3,KLF4,CCS,FBLN5,KDM6B,PRDX5,CBX8,PDGFD,MAP1LC3A,LRRK2
8_Member	GO Biological Processes	GO:0070301	cellular response to hydrogen peroxide	-4.60826	-2.774	19/82	25,388,1471,2308,3082,3297,4217,5598,5660,6778,7225,7295,8013,9314,23135,57332,80310,84557,120892	ABL1,RHOB,CST3,FOXO1,HGF,HSF1,MAP3K5,MAPK7,PSAP,STAT6,TRPC6,TXN,NR4A3,KLF4,KDM6B,CBX8,PDGFD,MAP1LC3A,LRRK2
8_Member	GO Biological Processes	GO:0010038	response to metal ion	-2.7287	-1.333	40/305	18,210,706,842,847,955,1244,1373,1528,1616,1788,1843,2185,2539,3077,3297,3383,3707,3727,4776,4891,5066,5176,6649,6770,6786,7474,8912,9451,10235,10397,10628,30061,51596,79085,79800,79901,84557,120892,728294	ABAT,ALAD,TSPO,CASP9,CAT,ENTPD6,ABCC2,CPS1,CYB5A,DAXX,DNMT3A,DUSP1,PTK2B,G6PD,HFE,HSF1,ICAM1,ITPKB,JUND,NFATC4,SLC11A2,PAM,SERPINF1,SOD3,STAR,STIM1,WNT5A,CACNA1H,EIF2AK3,RASGRP2,NDRG1,TXNIP,SLC40A1,CUTA,SLC25A23,CARF,CYBRD1,MAP1LC3A,LRRK2,D2HGDH
9_Summary	GO Biological Processes	GO:0055114	oxidation-reduction process	-12.0398	-8.893	144/972	35,125,178,216,217,220,221,224,230,347,847,1528,1534,1535,1593,1595,1632,1645,1717,1718,1728,1737,1891,2157,2170,2194,2232,2495,2539,2548,2632,2745,2878,2879,2882,2936,3156,3290,3417,3481,3643,3667,3953,3992,4128,4191,4257,4329,4524,4717,4776,5066,5166,5191,5226,5253,5447,5465,5468,5500,5507,5742,5768,6307,6309,6319,6648,6649,6697,6713,6821,7108,7291,7295,7296,7360,8013,8544,8660,8804,8864,9415,9…	ACADS,ADH1B,AGL,ALDH1A1,ALDH2,ALDH1A3,ALDH3B1,ALDH3A2,ALDOC,APOD,CAT,CYB5A,CYB561,CYBA,CYP27A1,CYP51A1,ECI1,AKR1C1,DHCR7,DHCR24,NQO1,DLAT,ECH1,F8,FABP3,FASN,FDXR,FTH1,G6PD,GAA,GBE1,GLRX,GPX3,GPX4,GPX7,GSR,HMGCR,HSD11B1,IDH1,IGF2,INSR,IRS1,LEPR,FADS1,MAOA,MDH2,MGST1,ALDH6A1,MTHFR,NDUFC1,NFATC4,PAM,PDK4,PEX7,PGD,PHF2,POR,PPARA,PPARG,PPP1CB,PPP1R3C,PTGS1,QSOX1,MSMO1,SC5D,SCD,SOD2,SOD3,SPR,SQLE,SUOX,…
9_Member	GO Biological Processes	GO:0055114	oxidation-reduction process	-12.0398	-8.893	144/972	35,125,178,216,217,220,221,224,230,347,847,1528,1534,1535,1593,1595,1632,1645,1717,1718,1728,1737,1891,2157,2170,2194,2232,2495,2539,2548,2632,2745,2878,2879,2882,2936,3156,3290,3417,3481,3643,3667,3953,3992,4128,4191,4257,4329,4524,4717,4776,5066,5166,5191,5226,5253,5447,5465,5468,5500,5507,5742,5768,6307,6309,6319,6648,6649,6697,6713,6821,7108,7291,7295,7296,7360,8013,8544,8660,8804,8864,9415,9…	ACADS,ADH1B,AGL,ALDH1A1,ALDH2,ALDH1A3,ALDH3B1,ALDH3A2,ALDOC,APOD,CAT,CYB5A,CYB561,CYBA,CYP27A1,CYP51A1,ECI1,AKR1C1,DHCR7,DHCR24,NQO1,DLAT,ECH1,F8,FABP3,FASN,FDXR,FTH1,G6PD,GAA,GBE1,GLRX,GPX3,GPX4,GPX7,GSR,HMGCR,HSD11B1,IDH1,IGF2,INSR,IRS1,LEPR,FADS1,MAOA,MDH2,MGST1,ALDH6A1,MTHFR,NDUFC1,NFATC4,PAM,PDK4,PEX7,PGD,PHF2,POR,PPARA,PPARG,PPP1CB,PPP1R3C,PTGS1,QSOX1,MSMO1,SC5D,SCD,SOD2,SOD3,SPR,SQLE,SUOX,…
10_Summary	GO Biological Processes	GO:0044712	single-organism catabolic process	-12.0298	-8.893	140/936	18,35,178,216,217,221,224,230,275,341,348,665,706,847,1267,1281,1290,1373,1471,1491,1509,1513,1632,1634,1891,2170,2517,2548,2581,2629,2648,2710,2720,2760,2799,3073,3176,3417,3425,3553,3613,3643,3667,3949,4041,4060,4126,4189,4316,4320,4324,4329,4758,5136,5139,5142,5144,5191,5337,5447,5465,5500,5538,5598,5919,6388,6448,6720,6721,6774,7263,7291,7353,7466,7844,7917,8398,8654,8660,8878,8942,9509,9666,…	ABAT,ACADS,AGL,ALDH1A1,ALDH2,ALDH3B1,ALDH3A2,ALDOC,AMT,APOC1,APOE,BNIP3L,TSPO,CAT,CNP,COL3A1,COL5A2,CPS1,CST3,CTH,CTSD,CTSK,ECI1,DCN,ECH1,FABP3,FUCA1,GAA,GALC,GBA,KAT2A,GK,GLB1,GM2A,GNS,HEXA,HNMT,IDH1,IDUA,IL1B,IMPA2,INSR,IRS1,LDLR,LRP5,LUM,MANBA,DNAJB9,MMP7,MMP11,MMP15,ALDH6A1,NEU1,PDE1A,PDE3A,PDE4B,PDE4D,PEX7,PLD1,POR,PPARA,PPP1CB,PPT1,MAPK7,RARRES2,SDF2,SGSH,SREBF1,SREBF2,STAT3,TST,TWIST1,UFD1…
10_Member	GO Biological Processes	GO:0044712	single-organism catabolic process	-12.0298	-8.893	140/936	18,35,178,216,217,221,224,230,275,341,348,665,706,847,1267,1281,1290,1373,1471,1491,1509,1513,1632,1634,1891,2170,2517,2548,2581,2629,2648,2710,2720,2760,2799,3073,3176,3417,3425,3553,3613,3643,3667,3949,4041,4060,4126,4189,4316,4320,4324,4329,4758,5136,5139,5142,5144,5191,5337,5447,5465,5500,5538,5598,5919,6388,6448,6720,6721,6774,7263,7291,7353,7466,7844,7917,8398,8654,8660,8878,8942,9509,9666,…	ABAT,ACADS,AGL,ALDH1A1,ALDH2,ALDH3B1,ALDH3A2,ALDOC,AMT,APOC1,APOE,BNIP3L,TSPO,CAT,CNP,COL3A1,COL5A2,CPS1,CST3,CTH,CTSD,CTSK,ECI1,DCN,ECH1,FABP3,FUCA1,GAA,GALC,GBA,KAT2A,GK,GLB1,GM2A,GNS,HEXA,HNMT,IDH1,IDUA,IL1B,IMPA2,INSR,IRS1,LDLR,LRP5,LUM,MANBA,DNAJB9,MMP7,MMP11,MMP15,ALDH6A1,NEU1,PDE1A,PDE3A,PDE4B,PDE4D,PEX7,PLD1,POR,PPARA,PPP1CB,PPT1,MAPK7,RARRES2,SDF2,SGSH,SREBF1,SREBF2,STAT3,TST,TWIST1,UFD1…
10_Member	GO Biological Processes	GO:1901565	organonitrogen compound catabolic process	-7.88495	-5.419	63/368	18,275,341,847,1200,1491,1634,1889,2517,2581,2629,2678,2686,2720,2760,2799,3073,3176,3425,3949,4060,4128,4329,4669,4758,5136,5139,5142,5144,5538,5598,6303,6383,6448,7263,8654,8692,8942,9672,10157,10404,10588,10840,10846,10924,23446,23464,23475,26090,27115,29958,51449,53343,54498,57214,78991,79094,79661,79873,83594,152926,196743,283927	ABAT,AMT,APOC1,CAT,TPP1,CTH,DCN,ECE1,FUCA1,GALC,GBA,GGT1,GGT7,GLB1,GM2A,GNS,HEXA,HNMT,IDUA,LDLR,LUM,MAOA,ALDH6A1,NAGLU,NEU1,PDE1A,PDE3A,PDE4B,PDE4D,PPT1,MAPK7,SAT1,SDC2,SGSH,TST,PDE5A,HYAL2,KYNU,SDC3,AASS,CPQ,MTHFS,ALDH1L1,PDE10A,SMPDL3A,SLC44A1,GCAT,QPRT,ABHD12,PDE7B,DMGDH,PCYOX1,NUDT9,SMOX,CEMIP,PCYOX1L,CHAC1,NEIL1,NUDT18,NUDT12,PPM1K,PAOX,NUDT7
10_Member	GO Biological Processes	GO:1901136	carbohydrate derivative catabolic process	-5.45816	-3.448	34/181	1471,1634,2517,2581,2629,2720,2760,2799,3073,3425,4060,4669,4758,5136,5139,5142,5144,5598,6383,6448,8654,8692,9672,10007,10846,11253,26270,27115,53343,55741,57214,79661,79873,283927	CST3,DCN,FUCA1,GALC,GBA,GLB1,GM2A,GNS,HEXA,IDUA,LUM,NAGLU,NEU1,PDE1A,PDE3A,PDE4B,PDE4D,MAPK7,SDC2,SGSH,PDE5A,HYAL2,SDC3,GNPDA1,PDE10A,MAN1B1,FBXO6,PDE7B,NUDT9,EDEM2,CEMIP,NEIL1,NUDT18,NUDT7
11_Summary	Hallmark Gene Sets	M5890	HALLMARK TNFA SIGNALING VIA NFKB	-11.2035	-8.254	48/200	19,182,388,687,694,1026,1051,1052,1435,1843,2114,3164,3383,3460,3553,3949,4783,4792,4814,4929,5142,5187,5734,5791,6303,6648,6776,6890,7050,7127,7422,7832,8013,8303,8613,8660,8878,8942,9308,9314,9516,10957,22822,23135,64135,80149,80176,150094	ABCA1,JAG1,RHOB,KLF9,BTG1,CDKN1A,CEBPB,CEBPD,CSF1,DUSP1,ETS2,NR4A1,ICAM1,IFNGR2,IL1B,LDLR,NFIL3,NFKBIA,NINJ1,NR4A2,PDE4B,PER1,PTGER4,PTPRE,SAT1,SOD2,STAT5A,TAP1,TGIF1,TNFAIP2,VEGFA,BTG2,NR4A3,SNN,PLPP3,IRS2,SQSTM1,KYNU,CD83,KLF4,LITAF,PNRC1,PHLDA1,KDM6B,IFIH1,ZC3H12A,SPSB1,SIK1
11_Member	Hallmark Gene Sets	M5890	HALLMARK TNFA SIGNALING VIA NFKB	-11.2035	-8.254	48/200	19,182,388,687,694,1026,1051,1052,1435,1843,2114,3164,3383,3460,3553,3949,4783,4792,4814,4929,5142,5187,5734,5791,6303,6648,6776,6890,7050,7127,7422,7832,8013,8303,8613,8660,8878,8942,9308,9314,9516,10957,22822,23135,64135,80149,80176,150094	ABCA1,JAG1,RHOB,KLF9,BTG1,CDKN1A,CEBPB,CEBPD,CSF1,DUSP1,ETS2,NR4A1,ICAM1,IFNGR2,IL1B,LDLR,NFIL3,NFKBIA,NINJ1,NR4A2,PDE4B,PER1,PTGER4,PTPRE,SAT1,SOD2,STAT5A,TAP1,TGIF1,TNFAIP2,VEGFA,BTG2,NR4A3,SNN,PLPP3,IRS2,SQSTM1,KYNU,CD83,KLF4,LITAF,PNRC1,PHLDA1,KDM6B,IFIH1,ZC3H12A,SPSB1,SIK1
12_Summary	GO Biological Processes	GO:0072359	circulatory system development	-10.9769	-8.048	135/921	25,94,101,133,182,283,284,347,348,388,409,576,577,585,639,652,677,694,1012,1281,1491,1634,1717,1889,1909,2034,2057,2064,2065,2185,2254,2308,2539,2548,2549,2648,2697,2969,3082,3164,3200,3202,3357,3399,3553,3643,3764,3776,3953,4041,4052,4211,4240,4303,4776,4854,5066,5156,5159,5176,5465,5468,5547,5598,5727,5764,5797,6094,6095,6303,6615,6909,7045,7046,7049,7127,7291,7422,7474,7857,7919,8313,8613,9314…	ABL1,ACVRL1,ADAM8,ADM,JAG1,ANG,ANGPT1,APOD,APOE,RHOB,ARRB2,ADGRB2,ADGRB3,BBS4,PRDM1,BMP4,ZFP36L1,BTG1,CDH13,COL3A1,CTH,DCN,DHCR7,ECE1,EDNRA,EPAS1,EPOR,ERBB2,ERBB3,PTK2B,FGF9,FOXO1,G6PD,GAA,GAB1,KAT2A,GJA1,GTF2I,HGF,NR4A1,HOXA3,HOXA5,HTR2B,ID3,IL1B,INSR,KCNJ8,KCNK2,LEPR,LRP5,LTBP1,MEIS1,MFGE8,FOXO4,NFATC4,NOTCH3,PAM,PDGFRA,PDGFRB,SERPINF1,PPARA,PPARG,PRCP,MAPK7,PTCH1,PTN,PTPRM,ROM1,RORA,SAT1,SNAI1…
12_Member	GO Biological Processes	GO:0072359	circulatory system development	-10.9769	-8.048	135/921	25,94,101,133,182,283,284,347,348,388,409,576,577,585,639,652,677,694,1012,1281,1491,1634,1717,1889,1909,2034,2057,2064,2065,2185,2254,2308,2539,2548,2549,2648,2697,2969,3082,3164,3200,3202,3357,3399,3553,3643,3764,3776,3953,4041,4052,4211,4240,4303,4776,4854,5066,5156,5159,5176,5465,5468,5547,5598,5727,5764,5797,6094,6095,6303,6615,6909,7045,7046,7049,7127,7291,7422,7474,7857,7919,8313,8613,9314…	ABL1,ACVRL1,ADAM8,ADM,JAG1,ANG,ANGPT1,APOD,APOE,RHOB,ARRB2,ADGRB2,ADGRB3,BBS4,PRDM1,BMP4,ZFP36L1,BTG1,CDH13,COL3A1,CTH,DCN,DHCR7,ECE1,EDNRA,EPAS1,EPOR,ERBB2,ERBB3,PTK2B,FGF9,FOXO1,G6PD,GAA,GAB1,KAT2A,GJA1,GTF2I,HGF,NR4A1,HOXA3,HOXA5,HTR2B,ID3,IL1B,INSR,KCNJ8,KCNK2,LEPR,LRP5,LTBP1,MEIS1,MFGE8,FOXO4,NFATC4,NOTCH3,PAM,PDGFRA,PDGFRB,SERPINF1,PPARA,PPARG,PRCP,MAPK7,PTCH1,PTN,PTPRM,ROM1,RORA,SAT1,SNAI1…
12_Member	GO Biological Processes	GO:0048514	blood vessel morphogenesis	-7.74332	-5.315	77/491	94,101,133,182,283,284,347,348,388,576,577,639,652,677,694,1012,1281,1634,1909,2034,2064,2185,2254,2969,3082,3164,3200,3202,3553,3953,4041,4211,4240,4303,4776,4854,5156,5159,5176,5547,5598,5764,5797,6095,6303,6909,7045,7046,7049,7127,7291,7422,7474,7857,9314,9394,9451,9464,9820,10203,10267,10457,10553,23213,23328,27286,28514,28984,28996,51162,54361,54828,80149,90627,93649,153090,154796	ACVRL1,ADAM8,ADM,JAG1,ANG,ANGPT1,APOD,APOE,RHOB,ADGRB2,ADGRB3,PRDM1,BMP4,ZFP36L1,BTG1,CDH13,COL3A1,DCN,EDNRA,EPAS1,ERBB2,PTK2B,FGF9,GTF2I,HGF,NR4A1,HOXA3,HOXA5,IL1B,LEPR,LRP5,MEIS1,MFGE8,FOXO4,NFATC4,NOTCH3,PDGFRA,PDGFRB,SERPINF1,PRCP,MAPK7,PTN,PTPRM,RORA,SAT1,TBX2,TGFBI,TGFBR1,TGFBR3,TNFAIP2,TWIST1,VEGFA,WNT5A,SCG2,KLF4,HS6ST1,EIF2AK3,HAND2,CUL7,CALCRL,RAMP1,GPNMB,HTATIP2,SULF1,SASH1,SRPX2,DLL1,…
12_Member	GO Biological Processes	GO:0072358	cardiovascular system development	-7.73417	-5.315	90/607	25,94,101,133,182,283,284,347,348,388,576,577,639,652,677,694,1012,1281,1491,1634,1717,1909,2034,2064,2185,2254,2308,2969,3082,3164,3200,3202,3553,3953,4041,4052,4211,4240,4303,4776,4854,5156,5159,5176,5547,5598,5764,5797,6094,6095,6303,6909,7045,7046,7049,7127,7291,7422,7474,7857,8613,9314,9394,9451,9464,9820,10203,10267,10457,10553,23213,23328,27077,27286,28514,28984,28996,50814,51162,54206,543…	ABL1,ACVRL1,ADAM8,ADM,JAG1,ANG,ANGPT1,APOD,APOE,RHOB,ADGRB2,ADGRB3,PRDM1,BMP4,ZFP36L1,BTG1,CDH13,COL3A1,CTH,DCN,DHCR7,EDNRA,EPAS1,ERBB2,PTK2B,FGF9,FOXO1,GTF2I,HGF,NR4A1,HOXA3,HOXA5,IL1B,LEPR,LRP5,LTBP1,MEIS1,MFGE8,FOXO4,NFATC4,NOTCH3,PDGFRA,PDGFRB,SERPINF1,PRCP,MAPK7,PTN,PTPRM,ROM1,RORA,SAT1,TBX2,TGFBI,TGFBR1,TGFBR3,TNFAIP2,TWIST1,VEGFA,WNT5A,SCG2,PLPP3,KLF4,HS6ST1,EIF2AK3,HAND2,CUL7,CALCRL,RAMP1…
12_Member	GO Biological Processes	GO:0001944	vasculature development	-7.73302	-5.315	89/598	94,101,133,182,283,284,347,348,388,576,577,639,652,677,694,1012,1281,1491,1634,1717,1909,2034,2064,2185,2254,2308,2969,3082,3164,3200,3202,3553,3953,4041,4052,4211,4240,4303,4776,4854,5156,5159,5176,5547,5598,5764,5797,6094,6095,6303,6909,7045,7046,7049,7127,7291,7422,7474,7857,8613,9314,9394,9451,9464,9820,10203,10267,10457,10553,23213,23328,27077,27286,28514,28984,28996,50814,51162,54206,54361,…	ACVRL1,ADAM8,ADM,JAG1,ANG,ANGPT1,APOD,APOE,RHOB,ADGRB2,ADGRB3,PRDM1,BMP4,ZFP36L1,BTG1,CDH13,COL3A1,CTH,DCN,DHCR7,EDNRA,EPAS1,ERBB2,PTK2B,FGF9,FOXO1,GTF2I,HGF,NR4A1,HOXA3,HOXA5,IL1B,LEPR,LRP5,LTBP1,MEIS1,MFGE8,FOXO4,NFATC4,NOTCH3,PDGFRA,PDGFRB,SERPINF1,PRCP,MAPK7,PTN,PTPRM,ROM1,RORA,SAT1,TBX2,TGFBI,TGFBR1,TGFBR3,TNFAIP2,TWIST1,VEGFA,WNT5A,SCG2,PLPP3,KLF4,HS6ST1,EIF2AK3,HAND2,CUL7,CALCRL,RAMP1,GPNM…
12_Member	GO Biological Processes	GO:0001525	angiogenesis	-7.51991	-5.138	67/410	94,101,133,182,283,284,347,388,576,577,652,694,1012,1634,1909,2034,2064,2185,2254,2969,3082,3164,3200,3202,3553,3953,4211,4240,4303,4776,4854,5156,5159,5176,5547,5598,5764,5797,6095,6303,7045,7046,7127,7291,7422,7474,7857,9314,9394,9451,9464,10203,10267,10457,10553,23213,23328,27286,28514,28984,28996,51162,54828,80149,90627,153090,154796	ACVRL1,ADAM8,ADM,JAG1,ANG,ANGPT1,APOD,RHOB,ADGRB2,ADGRB3,BMP4,BTG1,CDH13,DCN,EDNRA,EPAS1,ERBB2,PTK2B,FGF9,GTF2I,HGF,NR4A1,HOXA3,HOXA5,IL1B,LEPR,MEIS1,MFGE8,FOXO4,NFATC4,NOTCH3,PDGFRA,PDGFRB,SERPINF1,PRCP,MAPK7,PTN,PTPRM,RORA,SAT1,TGFBI,TGFBR1,TNFAIP2,TWIST1,VEGFA,WNT5A,SCG2,KLF4,HS6ST1,EIF2AK3,HAND2,CALCRL,RAMP1,GPNMB,HTATIP2,SULF1,SASH1,SRPX2,DLL1,RGCC,HIPK2,EGFL7,BCAS3,ZC3H12A,STARD13,DAB2IP,AM…
12_Member	GO Biological Processes	GO:0051270	regulation of cellular component movement	-7.39972	-5.035	108/784	25,94,101,104,182,284,347,348,388,583,585,652,683,1012,1081,1281,1366,1435,1634,1902,2064,2065,2159,2185,2192,2252,2549,3082,3383,3554,3570,3643,3717,3728,3910,3912,4163,4254,4303,5142,5144,5156,5159,5176,5295,5547,5734,5764,5793,5797,5919,6387,6615,6750,6774,6776,7046,7049,7291,7422,7474,8519,8613,8660,8692,8764,9314,9759,10076,10370,10396,10457,11188,22800,23189,23213,23328,23654,26012,27202,27…	ABL1,ACVRL1,ADAM8,ADARB1,JAG1,ANGPT1,APOD,APOE,RHOB,BBS2,BBS4,BMP4,BST1,CDH13,CGA,COL3A1,CLDN7,CSF1,DCN,LPAR1,ERBB2,ERBB3,F10,PTK2B,FBLN1,FGF7,GAB1,HGF,ICAM1,IL1R1,IL6R,INSR,JAK2,JUP,LAMA4,LAMB1,MCC,KITLG,FOXO4,PDE4B,PDE4D,PDGFRA,PDGFRB,SERPINF1,PIK3R1,PRCP,PTGER4,PTN,PTPRG,PTPRM,RARRES2,CXCL12,SNAI1,SST,STAT3,STAT5A,TGFBR1,TGFBR3,TWIST1,VEGFA,WNT5A,IFITM1,PLPP3,IRS2,HYAL2,TNFRSF14,KLF4,HDAC4,PTP…
12_Member	GO Biological Processes	GO:0001568	blood vessel development	-7.2456	-4.903	85/576	94,101,133,182,283,284,347,348,388,576,577,639,652,677,694,1012,1281,1634,1717,1909,2034,2064,2185,2254,2308,2969,3082,3164,3200,3202,3553,3953,4041,4052,4211,4240,4303,4776,4854,5156,5159,5176,5547,5598,5764,5797,6095,6303,6909,7045,7046,7049,7127,7291,7422,7474,7857,8613,9314,9394,9451,9464,9820,10203,10267,10457,10553,23213,23328,27286,28514,28984,28996,50814,51162,54361,54828,79659,80149,8031…	ACVRL1,ADAM8,ADM,JAG1,ANG,ANGPT1,APOD,APOE,RHOB,ADGRB2,ADGRB3,PRDM1,BMP4,ZFP36L1,BTG1,CDH13,COL3A1,DCN,DHCR7,EDNRA,EPAS1,ERBB2,PTK2B,FGF9,FOXO1,GTF2I,HGF,NR4A1,HOXA3,HOXA5,IL1B,LEPR,LRP5,LTBP1,MEIS1,MFGE8,FOXO4,NFATC4,NOTCH3,PDGFRA,PDGFRB,SERPINF1,PRCP,MAPK7,PTN,PTPRM,RORA,SAT1,TBX2,TGFBI,TGFBR1,TGFBR3,TNFAIP2,TWIST1,VEGFA,WNT5A,SCG2,PLPP3,KLF4,HS6ST1,EIF2AK3,HAND2,CUL7,CALCRL,RAMP1,GPNMB,HTATIP2…
12_Member	GO Biological Processes	GO:0040012	regulation of locomotion	-7.21317	-4.881	107/781	25,94,101,104,182,284,347,348,388,583,585,652,683,1012,1081,1281,1366,1435,1634,1902,2064,2065,2159,2185,2192,2252,2549,3082,3383,3554,3570,3643,3717,3910,3912,4163,4254,4303,5091,5156,5159,5176,5295,5547,5734,5764,5793,5797,5919,5987,6387,6615,6750,6774,6776,7046,7291,7422,7474,7857,8519,8613,8660,8692,8764,9314,9759,10076,10206,10370,10396,10457,11188,22800,23087,23189,23213,23328,23654,26012,2…	ABL1,ACVRL1,ADAM8,ADARB1,JAG1,ANGPT1,APOD,APOE,RHOB,BBS2,BBS4,BMP4,BST1,CDH13,CGA,COL3A1,CLDN7,CSF1,DCN,LPAR1,ERBB2,ERBB3,F10,PTK2B,FBLN1,FGF7,GAB1,HGF,ICAM1,IL1R1,IL6R,INSR,JAK2,LAMA4,LAMB1,MCC,KITLG,FOXO4,PC,PDGFRA,PDGFRB,SERPINF1,PIK3R1,PRCP,PTGER4,PTN,PTPRG,PTPRM,RARRES2,TRIM27,CXCL12,SNAI1,SST,STAT3,STAT5A,TGFBR1,TWIST1,VEGFA,WNT5A,SCG2,IFITM1,PLPP3,IRS2,HYAL2,TNFRSF14,KLF4,HDAC4,PTPRU,TRIM1…
12_Member	GO Biological Processes	GO:2000145	regulation of cell motility	-7.18829	-4.867	100/716	25,94,101,104,182,284,347,348,388,583,585,652,683,1012,1081,1281,1366,1435,1634,1902,2064,2065,2159,2185,2192,2252,2549,3082,3383,3554,3570,3643,3717,3910,3912,4163,4254,4303,5156,5159,5176,5295,5547,5734,5764,5793,5797,5919,6387,6615,6750,6774,6776,7046,7291,7422,7474,8519,8613,8660,8692,8764,9314,9759,10076,10370,10396,10457,11188,22800,23189,23213,23328,23654,26012,27202,27286,28984,29085,2998…	ABL1,ACVRL1,ADAM8,ADARB1,JAG1,ANGPT1,APOD,APOE,RHOB,BBS2,BBS4,BMP4,BST1,CDH13,CGA,COL3A1,CLDN7,CSF1,DCN,LPAR1,ERBB2,ERBB3,F10,PTK2B,FBLN1,FGF7,GAB1,HGF,ICAM1,IL1R1,IL6R,INSR,JAK2,LAMA4,LAMB1,MCC,KITLG,FOXO4,PDGFRA,PDGFRB,SERPINF1,PIK3R1,PRCP,PTGER4,PTN,PTPRG,PTPRM,RARRES2,CXCL12,SNAI1,SST,STAT3,STAT5A,TGFBR1,TWIST1,VEGFA,WNT5A,IFITM1,PLPP3,IRS2,HYAL2,TNFRSF14,KLF4,HDAC4,PTPRU,CITED2,ATP8A1,GPNMB,…
12_Member	GO Biological Processes	GO:0030334	regulation of cell migration	-6.20103	-4.029	91/665	94,101,104,182,284,347,348,388,652,683,1012,1081,1281,1435,1634,1902,2159,2185,2252,2549,3082,3383,3554,3570,3643,3717,3910,3912,4163,4254,4303,5156,5159,5176,5295,5547,5734,5764,5793,5797,5919,6387,6615,6750,6774,6776,7046,7422,7474,8519,8613,8660,8692,8764,9314,9759,10076,10370,10396,10457,11188,22800,23189,23213,23328,23654,26012,27202,27286,28984,29984,50507,54361,54828,54986,57214,57580,5934…	ACVRL1,ADAM8,ADARB1,JAG1,ANGPT1,APOD,APOE,RHOB,BMP4,BST1,CDH13,CGA,COL3A1,CSF1,DCN,LPAR1,F10,PTK2B,FGF7,GAB1,HGF,ICAM1,IL1R1,IL6R,INSR,JAK2,LAMA4,LAMB1,MCC,KITLG,FOXO4,PDGFRA,PDGFRB,SERPINF1,PIK3R1,PRCP,PTGER4,PTN,PTPRG,PTPRM,RARRES2,CXCL12,SNAI1,SST,STAT3,STAT5A,TGFBR1,VEGFA,WNT5A,IFITM1,PLPP3,IRS2,HYAL2,TNFRSF14,KLF4,HDAC4,PTPRU,CITED2,ATP8A1,GPNMB,NISCH,RRAS2,KANK1,SULF1,SASH1,PLXNB2,NSMF,C5AR…
12_Member	GO Biological Processes	GO:0048646	anatomical structure formation involved in morphogenesis	-6.02386	-3.896	120/953	25,94,101,133,182,220,283,284,347,388,576,577,585,652,694,842,948,1012,1290,1634,1843,1909,2034,2064,2114,2185,2254,2308,2323,2648,2969,3082,3164,3200,3202,3207,3553,3912,3953,4211,4240,4303,4324,4776,4854,5156,5159,5176,5465,5547,5598,5727,5764,5797,6095,6303,6615,6786,6909,7045,7046,7049,7052,7127,7291,7422,7474,7857,8013,8313,8912,9149,9314,9394,9451,9464,9510,9518,10018,10117,10203,10211,1025…	ABL1,ACVRL1,ADAM8,ADM,JAG1,ALDH1A3,ANG,ANGPT1,APOD,RHOB,ADGRB2,ADGRB3,BBS4,BMP4,BTG1,CASP9,CD36,CDH13,COL5A2,DCN,DUSP1,EDNRA,EPAS1,ERBB2,ETS2,PTK2B,FGF9,FOXO1,FLT3LG,KAT2A,GTF2I,HGF,NR4A1,HOXA3,HOXA5,HOXA11,IL1B,LAMB1,LEPR,MEIS1,MFGE8,FOXO4,MMP15,NFATC4,NOTCH3,PDGFRA,PDGFRB,SERPINF1,PPARA,PRCP,MAPK7,PTCH1,PTN,PTPRM,RORA,SAT1,SNAI1,STIM1,TBX2,TGFBI,TGFBR1,TGFBR3,TGM2,TNFAIP2,TWIST1,VEGFA,WNT5A,SCG…
12_Member	GO Biological Processes	GO:0051272	positive regulation of cellular component movement	-4.95435	-3.044	59/408	101,284,388,652,1012,1081,1366,1435,1902,2159,2185,2252,3082,3383,3554,3570,3643,3717,3912,4254,4303,5156,5159,5295,5919,6387,6615,6776,7046,7291,7422,7474,8613,8660,8764,9759,10396,10457,22800,23328,26012,27286,29085,29984,50507,54795,54828,57214,57580,59341,65992,80031,80149,80310,84913,153090,284114,375056,388591	ADAM8,ANGPT1,RHOB,BMP4,CDH13,CGA,CLDN7,CSF1,LPAR1,F10,PTK2B,FGF7,HGF,ICAM1,IL1R1,IL6R,INSR,JAK2,LAMB1,KITLG,FOXO4,PDGFRA,PDGFRB,PIK3R1,RARRES2,CXCL12,SNAI1,STAT5A,TGFBR1,TWIST1,VEGFA,WNT5A,PLPP3,IRS2,TNFRSF14,HDAC4,ATP8A1,GPNMB,RRAS2,SASH1,NSMF,SRPX2,PHPT1,RHOD,NOX4,TRPM4,BCAS3,CEMIP,PREX1,TRPV4,DDRGK1,SEMA6D,ZC3H12A,PDGFD,ATOH8,DAB2IP,TMEM102,MIA3,RNF207
12_Member	GO Biological Processes	GO:2000147	positive regulation of cell motility	-4.68481	-2.835	57/398	101,284,388,652,1012,1081,1366,1435,1902,2159,2185,2252,3082,3383,3554,3570,3643,3717,3912,4254,4303,5156,5159,5295,5919,6387,6615,6776,7046,7291,7422,7474,8613,8660,8764,9759,10396,10457,22800,23328,26012,27286,29085,29984,50507,54828,57214,57580,59341,65992,80031,80149,80310,84913,153090,284114,375056	ADAM8,ANGPT1,RHOB,BMP4,CDH13,CGA,CLDN7,CSF1,LPAR1,F10,PTK2B,FGF7,HGF,ICAM1,IL1R1,IL6R,INSR,JAK2,LAMB1,KITLG,FOXO4,PDGFRA,PDGFRB,PIK3R1,RARRES2,CXCL12,SNAI1,STAT5A,TGFBR1,TWIST1,VEGFA,WNT5A,PLPP3,IRS2,TNFRSF14,HDAC4,ATP8A1,GPNMB,RRAS2,SASH1,NSMF,SRPX2,PHPT1,RHOD,NOX4,BCAS3,CEMIP,PREX1,TRPV4,DDRGK1,SEMA6D,ZC3H12A,PDGFD,ATOH8,DAB2IP,TMEM102,MIA3
12_Member	GO Biological Processes	GO:0040017	positive regulation of locomotion	-4.42437	-2.619	59/425	101,284,388,652,1012,1081,1366,1435,1902,2159,2185,2252,3082,3383,3554,3570,3643,3717,3912,4254,4303,5091,5156,5159,5295,5919,6387,6615,6776,7046,7291,7422,7474,7857,8613,8660,8764,9759,10396,10457,22800,23328,26012,27286,29085,29984,50507,54828,57214,57580,59341,65992,80031,80149,80310,84913,153090,284114,375056	ADAM8,ANGPT1,RHOB,BMP4,CDH13,CGA,CLDN7,CSF1,LPAR1,F10,PTK2B,FGF7,HGF,ICAM1,IL1R1,IL6R,INSR,JAK2,LAMB1,KITLG,FOXO4,PC,PDGFRA,PDGFRB,PIK3R1,RARRES2,CXCL12,SNAI1,STAT5A,TGFBR1,TWIST1,VEGFA,WNT5A,SCG2,PLPP3,IRS2,TNFRSF14,HDAC4,ATP8A1,GPNMB,RRAS2,SASH1,NSMF,SRPX2,PHPT1,RHOD,NOX4,BCAS3,CEMIP,PREX1,TRPV4,DDRGK1,SEMA6D,ZC3H12A,PDGFD,ATOH8,DAB2IP,TMEM102,MIA3
12_Member	GO Biological Processes	GO:0030335	positive regulation of cell migration	-4.28553	-2.51	54/383	101,284,388,652,1012,1081,1435,1902,2159,2185,2252,3082,3383,3554,3570,3643,3717,3912,4254,4303,5156,5159,5295,5919,6387,6615,6776,7046,7422,7474,8613,8660,8764,9759,10396,10457,22800,23328,26012,27286,29984,50507,54828,57214,57580,59341,65992,80031,80149,80310,84913,153090,284114,375056	ADAM8,ANGPT1,RHOB,BMP4,CDH13,CGA,CSF1,LPAR1,F10,PTK2B,FGF7,HGF,ICAM1,IL1R1,IL6R,INSR,JAK2,LAMB1,KITLG,FOXO4,PDGFRA,PDGFRB,PIK3R1,RARRES2,CXCL12,SNAI1,STAT5A,TGFBR1,VEGFA,WNT5A,PLPP3,IRS2,TNFRSF14,HDAC4,ATP8A1,GPNMB,RRAS2,SASH1,NSMF,SRPX2,RHOD,NOX4,BCAS3,CEMIP,PREX1,TRPV4,DDRGK1,SEMA6D,ZC3H12A,PDGFD,ATOH8,DAB2IP,TMEM102,MIA3
13_Summary	GO Biological Processes	GO:0033993	response to lipid	-10.5057	-7.67	128/871	19,20,25,112,133,178,210,409,639,652,677,687,706,834,842,847,948,1026,1051,1191,1244,1267,1373,1408,1471,1535,1616,1634,1655,1728,1788,1843,1902,2170,2185,2308,2629,2697,3157,3164,3176,3297,3351,3383,3399,3417,3490,3553,3600,3717,3727,3764,3949,4055,4192,4257,4258,4324,4776,4792,4929,5066,5069,5142,5144,5159,5166,5176,5187,5241,5465,5468,5617,5727,5732,5734,5764,5972,6095,6096,6696,6720,6750,6770…	ABCA1,ABCA2,ABL1,ADCY6,ADM,AGL,ALAD,ARRB2,PRDM1,BMP4,ZFP36L1,KLF9,TSPO,CASP1,CASP9,CAT,CD36,CDKN1A,CEBPB,CLU,ABCC2,CNP,CPS1,CRY2,CST3,CYBA,DAXX,DCN,DDX5,NQO1,DNMT3A,DUSP1,LPAR1,FABP3,PTK2B,FOXO1,GBA,GJA1,HMGCS1,NR4A1,HNMT,HSF1,HTR1B,ICAM1,ID3,IDH1,IGFBP7,IL1B,IL15,JAK2,JUND,KCNJ8,LDLR,LTBR,MDK,MGST1,MGST2,MMP15,NFATC4,NFKBIA,NR4A2,PAM,PAPPA,PDE4B,PDE4D,PDGFRB,PDK4,SERPINF1,PER1,PGR,PPARA,PPARG,PR…
13_Member	GO Biological Processes	GO:0033993	response to lipid	-10.5057	-7.67	128/871	19,20,25,112,133,178,210,409,639,652,677,687,706,834,842,847,948,1026,1051,1191,1244,1267,1373,1408,1471,1535,1616,1634,1655,1728,1788,1843,1902,2170,2185,2308,2629,2697,3157,3164,3176,3297,3351,3383,3399,3417,3490,3553,3600,3717,3727,3764,3949,4055,4192,4257,4258,4324,4776,4792,4929,5066,5069,5142,5144,5159,5166,5176,5187,5241,5465,5468,5617,5727,5732,5734,5764,5972,6095,6096,6696,6720,6750,6770…	ABCA1,ABCA2,ABL1,ADCY6,ADM,AGL,ALAD,ARRB2,PRDM1,BMP4,ZFP36L1,KLF9,TSPO,CASP1,CASP9,CAT,CD36,CDKN1A,CEBPB,CLU,ABCC2,CNP,CPS1,CRY2,CST3,CYBA,DAXX,DCN,DDX5,NQO1,DNMT3A,DUSP1,LPAR1,FABP3,PTK2B,FOXO1,GBA,GJA1,HMGCS1,NR4A1,HNMT,HSF1,HTR1B,ICAM1,ID3,IDH1,IGFBP7,IL1B,IL15,JAK2,JUND,KCNJ8,LDLR,LTBR,MDK,MGST1,MGST2,MMP15,NFATC4,NFKBIA,NR4A2,PAM,PAPPA,PDE4B,PDE4D,PDGFRB,PDK4,SERPINF1,PER1,PGR,PPARA,PPARG,PR…
13_Member	GO Biological Processes	GO:0014070	response to organic cyclic compound	-8.81215	-6.269	127/915	18,19,20,25,112,123,133,178,210,409,610,652,677,687,706,834,842,847,948,1026,1051,1191,1244,1373,1408,1471,1535,1616,1655,1728,1788,1843,2052,2185,2281,2308,2539,2562,2629,2648,2730,2946,3157,3164,3176,3297,3351,3383,3399,3417,3490,3553,3600,3717,3727,3728,3764,3775,4060,4093,4192,4324,4524,4776,4792,4929,5025,5066,5069,5139,5142,5144,5159,5176,5187,5241,5465,5468,5617,5727,5732,5764,5972,6095,60…	ABAT,ABCA1,ABCA2,ABL1,ADCY6,PLIN2,ADM,AGL,ALAD,ARRB2,HCN2,BMP4,ZFP36L1,KLF9,TSPO,CASP1,CASP9,CAT,CD36,CDKN1A,CEBPB,CLU,ABCC2,CPS1,CRY2,CST3,CYBA,DAXX,DDX5,NQO1,DNMT3A,DUSP1,EPHX1,PTK2B,FKBP1B,FOXO1,G6PD,GABRB3,GBA,KAT2A,GCLM,GSTM2,HMGCS1,NR4A1,HNMT,HSF1,HTR1B,ICAM1,ID3,IDH1,IGFBP7,IL1B,IL15,JAK2,JUND,JUP,KCNJ8,KCNK1,LUM,SMAD9,MDK,MMP15,MTHFR,NFATC4,NFKBIA,NR4A2,P2RX4,PAM,PAPPA,PDE3A,PDE4B,PDE4D,P…
13_Member	GO Biological Processes	GO:0048545	response to steroid hormone	-6.28058	-4.094	60/380	20,133,178,210,409,652,677,687,706,842,1026,1244,1373,1408,1535,1616,1655,1843,2308,2629,3164,3176,3351,3383,3417,3490,3717,4192,4929,5066,5069,5176,5187,5241,5465,5468,5732,5764,6095,6096,6696,6720,6750,6770,7025,7068,8013,8611,10062,10076,10424,10628,11214,54206,54541,65992,84709,85315,114907,153222	ABCA2,ADM,AGL,ALAD,ARRB2,BMP4,ZFP36L1,KLF9,TSPO,CASP9,CDKN1A,ABCC2,CPS1,CRY2,CYBA,DAXX,DDX5,DUSP1,FOXO1,GBA,NR4A1,HNMT,HTR1B,ICAM1,IDH1,IGFBP7,JAK2,MDK,NR4A2,PAM,PAPPA,SERPINF1,PER1,PGR,PPARA,PPARG,PTGER2,PTN,RORA,RORB,SPP1,SREBF1,SST,STAR,NR2F1,THRB,NR4A3,PLPP1,NR1H3,PTPRU,PGRMC2,TXNIP,AKAP13,ERRFI1,DDIT4,DDRGK1,MGARP,PAQR8,FBXO32,CREBRF
13_Member	GO Biological Processes	GO:0071396	cellular response to lipid	-5.82262	-3.733	75/528	19,25,112,409,639,652,677,687,706,842,948,1051,1191,1244,1373,1408,1616,1655,1902,2185,2308,3157,3164,3297,3383,3399,3553,3600,3717,3949,4776,4792,4929,5142,5144,5166,5176,5187,5241,5465,5468,5727,5732,5734,5764,6095,6096,6720,6770,7025,7035,7068,7133,7474,8013,8611,9314,9516,10062,10417,10424,11214,23328,23643,54206,54541,55022,57088,65992,80149,84709,85315,114907,153090,153222	ABCA1,ABL1,ADCY6,ARRB2,PRDM1,BMP4,ZFP36L1,KLF9,TSPO,CASP9,CD36,CEBPB,CLU,ABCC2,CPS1,CRY2,DAXX,DDX5,LPAR1,PTK2B,FOXO1,HMGCS1,NR4A1,HSF1,ICAM1,ID3,IL1B,IL15,JAK2,LDLR,NFATC4,NFKBIA,NR4A2,PDE4B,PDE4D,PDK4,SERPINF1,PER1,PGR,PPARA,PPARG,PTCH1,PTGER2,PTGER4,PTN,RORA,RORB,SREBF1,STAR,NR2F1,TFPI,THRB,TNFRSF1B,WNT5A,NR4A3,PLPP1,KLF4,LITAF,NR1H3,SPON2,PGRMC2,AKAP13,SASH1,LY96,ERRFI1,DDIT4,PID1,PLSCR4,DDRGK…
13_Member	GO Biological Processes	GO:0071407	cellular response to organic cyclic compound	-5.56712	-3.528	74/527	19,25,112,409,610,652,677,687,842,1051,1191,1244,1373,1408,1535,1616,1655,2308,2562,2730,2946,3157,3164,3297,3383,3399,3553,3600,3717,3728,4093,4776,4792,4929,5025,5139,5142,5144,5176,5187,5241,5465,5468,5727,5764,6095,6096,6770,6774,7025,7068,8013,8611,9314,9472,10062,10211,10424,11214,23318,23514,50507,54206,54541,65010,65992,80149,84709,85315,114907,120892,144233,153222,340061	ABCA1,ABL1,ADCY6,ARRB2,HCN2,BMP4,ZFP36L1,KLF9,CASP9,CEBPB,CLU,ABCC2,CPS1,CRY2,CYBA,DAXX,DDX5,FOXO1,GABRB3,GCLM,GSTM2,HMGCS1,NR4A1,HSF1,ICAM1,ID3,IL1B,IL15,JAK2,JUP,SMAD9,NFATC4,NFKBIA,NR4A2,P2RX4,PDE3A,PDE4B,PDE4D,SERPINF1,PER1,PGR,PPARA,PPARG,PTCH1,PTN,RORA,RORB,STAR,STAT3,NR2F1,THRB,NR4A3,PLPP1,KLF4,AKAP6,NR1H3,FLOT1,PGRMC2,AKAP13,ZCCHC11,SPIDR,NOX4,ERRFI1,DDIT4,SLC26A6,DDRGK1,ZC3H12A,MGARP,PAQ…
13_Member	GO Biological Processes	GO:0071383	cellular response to steroid hormone stimulus	-3.47411	-1.866	36/243	409,652,677,687,842,1244,1408,1616,1655,2308,3164,3383,3717,4929,5176,5187,5241,5465,5468,6095,6096,6770,7025,7068,8013,8611,10062,10424,11214,54206,54541,65992,84709,85315,114907,153222	ARRB2,BMP4,ZFP36L1,KLF9,CASP9,ABCC2,CRY2,DAXX,DDX5,FOXO1,NR4A1,ICAM1,JAK2,NR4A2,SERPINF1,PER1,PGR,PPARA,PPARG,RORA,RORB,STAR,NR2F1,THRB,NR4A3,PLPP1,NR1H3,PGRMC2,AKAP13,ERRFI1,DDIT4,DDRGK1,MGARP,PAQR8,FBXO32,CREBRF
13_Member	GO Biological Processes	GO:0009755	hormone-mediated signaling pathway	-2.43651	-1.125	30/220	409,652,1408,1616,1655,3164,3717,4929,5187,5241,5465,5468,5547,5972,6095,6096,6750,6776,6777,7025,7068,8013,8611,10062,10424,11214,65992,85315,153222,376497	ARRB2,BMP4,CRY2,DAXX,DDX5,NR4A1,JAK2,NR4A2,PER1,PGR,PPARA,PPARG,PRCP,REN,RORA,RORB,SST,STAT5A,STAT5B,NR2F1,THRB,NR4A3,PLPP1,NR1H3,PGRMC2,AKAP13,DDRGK1,PAQR8,CREBRF,SLC27A1
14_Summary	KEGG Pathway	M00101	Cholesterol biosynthesis, squalene 2,3-epoxide => cholesterol	-9.89647	-7.123	43049	1595,1717,1718,4047,6307,6309,7108,10826,50814,51478,6713	CYP51A1,DHCR7,DHCR24,LSS,MSMO1,SC5D,TM7SF2,FAXDC2,NSDHL,HSD17B7,SQLE
14_Member	KEGG Pathway	M00101	Cholesterol biosynthesis, squalene 2,3-epoxide => cholesterol	-9.89647	-7.123	43049	1595,1717,1718,4047,6307,6309,7108,10826,50814,51478	CYP51A1,DHCR7,DHCR24,LSS,MSMO1,SC5D,TM7SF2,FAXDC2,NSDHL,HSD17B7
14_Member	KEGG Pathway	hsa_M00101	Cholesterol biosynthesis, squalene 2,3-epoxide => cholesterol	-9.89647	-7.123	43049	1595,1717,1718,4047,6307,6309,7108,10826,50814,51478	CYP51A1,DHCR7,DHCR24,LSS,MSMO1,SC5D,TM7SF2,FAXDC2,NSDHL,HSD17B7
14_Member	KEGG Pathway	hsa00100	Steroid biosynthesis	-7.07173	-4.77	44136	1595,1717,1718,4047,6307,6309,6713,7108,10826,50814,51478	CYP51A1,DHCR7,DHCR24,LSS,MSMO1,SC5D,SQLE,TM7SF2,FAXDC2,NSDHL,HSD17B7
14_Member	KEGG Pathway	ko00100	Steroid biosynthesis	-7.07173	-4.77	44136	1595,1717,1718,4047,6307,6309,6713,7108,10826,50814,51478	CYP51A1,DHCR7,DHCR24,LSS,MSMO1,SC5D,SQLE,TM7SF2,FAXDC2,NSDHL,HSD17B7
14_Member	Reactome Gene Sets	R-HSA-6807062	Cholesterol biosynthesis via lathosterol	-2.69438	-1.314	42828	1717,1718,6309	DHCR7,DHCR24,SC5D
14_Member	GO Biological Processes	GO:0033489	cholesterol biosynthetic process via desmosterol	-2.69438	-1.314	42828	1717,1718,6309	DHCR7,DHCR24,SC5D
14_Member	Reactome Gene Sets	R-HSA-6807047	Cholesterol biosynthesis via desmosterol	-2.69438	-1.314	42828	1717,1718,6309	DHCR7,DHCR24,SC5D
14_Member	GO Biological Processes	GO:0033490	cholesterol biosynthetic process via lathosterol	-2.69438	-1.314	42828	1717,1718,6309	DHCR7,DHCR24,SC5D
15_Summary	GO Biological Processes	GO:0010942	positive regulation of cell death	-9.86325	-7.117	96/603	25,101,133,220,274,388,408,652,665,668,694,706,834,842,1026,1191,1616,1687,1728,1788,1843,1902,2308,2487,2534,3156,3202,3297,3399,3429,3672,3717,3776,4055,4217,4776,5159,5468,5519,5764,6196,6272,6453,7046,7052,7474,7704,8013,8313,8398,8406,8692,8717,8878,9451,9459,9500,9759,10018,10206,10550,10628,11214,23087,23385,25999,26471,27018,27113,27250,28984,29948,50507,51107,51147,51741,54541,55367,5744…	ABL1,ADAM8,ADM,ALDH1A3,BIN1,RHOB,ARRB1,BMP4,BNIP3L,FOXL2,BTG1,TSPO,CASP1,CASP9,CDKN1A,CLU,DAXX,DFNA5,NQO1,DNMT3A,DUSP1,LPAR1,FOXO1,FRZB,FYN,HMGCR,HOXA5,HSF1,ID3,IFI27,ITGA1,JAK2,KCNK2,LTBR,MAP3K5,NFATC4,PDGFRB,PPARG,PPP2R1B,PTN,RPS6KA2,SORT1,ITSN1,TGFBR1,TGM2,WNT5A,ZBTB16,NR4A3,AXIN2,PLA2G6,SRPX,HYAL2,TRADD,SQSTM1,EIF2AK3,ARHGEF6,MAGED1,HDAC4,BCL2L11,TRIM13,ARL6IP5,TXNIP,AKAP13,TRIM35,NCSTN,CLIP3…
15_Member	GO Biological Processes	GO:0010942	positive regulation of cell death	-9.86325	-7.117	96/603	25,101,133,220,274,388,408,652,665,668,694,706,834,842,1026,1191,1616,1687,1728,1788,1843,1902,2308,2487,2534,3156,3202,3297,3399,3429,3672,3717,3776,4055,4217,4776,5159,5468,5519,5764,6196,6272,6453,7046,7052,7474,7704,8013,8313,8398,8406,8692,8717,8878,9451,9459,9500,9759,10018,10206,10550,10628,11214,23087,23385,25999,26471,27018,27113,27250,28984,29948,50507,51107,51147,51741,54541,55367,5744…	ABL1,ADAM8,ADM,ALDH1A3,BIN1,RHOB,ARRB1,BMP4,BNIP3L,FOXL2,BTG1,TSPO,CASP1,CASP9,CDKN1A,CLU,DAXX,DFNA5,NQO1,DNMT3A,DUSP1,LPAR1,FOXO1,FRZB,FYN,HMGCR,HOXA5,HSF1,ID3,IFI27,ITGA1,JAK2,KCNK2,LTBR,MAP3K5,NFATC4,PDGFRB,PPARG,PPP2R1B,PTN,RPS6KA2,SORT1,ITSN1,TGFBR1,TGM2,WNT5A,ZBTB16,NR4A3,AXIN2,PLA2G6,SRPX,HYAL2,TRADD,SQSTM1,EIF2AK3,ARHGEF6,MAGED1,HDAC4,BCL2L11,TRIM13,ARL6IP5,TXNIP,AKAP13,TRIM35,NCSTN,CLIP3…
15_Member	GO Biological Processes	GO:0043068	positive regulation of programmed cell death	-8.056	-5.553	87/571	25,101,133,220,274,388,408,652,665,668,694,706,834,842,1026,1687,1728,1843,1902,2308,2487,3156,3202,3297,3399,3429,3672,3717,4055,4217,4776,5159,5468,5519,5764,6196,6272,6453,7046,7052,7474,7704,8013,8398,8406,8692,8717,8878,9451,9459,9500,9759,10018,10550,10628,11214,23087,23385,25999,26471,27018,27113,27250,28984,29948,50507,51107,51147,51741,55367,57449,57580,60485,64393,80149,81618,83464,8403…	ABL1,ADAM8,ADM,ALDH1A3,BIN1,RHOB,ARRB1,BMP4,BNIP3L,FOXL2,BTG1,TSPO,CASP1,CASP9,CDKN1A,DFNA5,NQO1,DUSP1,LPAR1,FOXO1,FRZB,HMGCR,HOXA5,HSF1,ID3,IFI27,ITGA1,JAK2,LTBR,MAP3K5,NFATC4,PDGFRB,PPARG,PPP2R1B,PTN,RPS6KA2,SORT1,ITSN1,TGFBR1,TGM2,WNT5A,ZBTB16,NR4A3,PLA2G6,SRPX,HYAL2,TRADD,SQSTM1,EIF2AK3,ARHGEF6,MAGED1,HDAC4,BCL2L11,ARL6IP5,TXNIP,AKAP13,TRIM35,NCSTN,CLIP3,NUPR1,BEX3,BBC3,PDCD4,RGCC,OSGIN1,NOX4…
15_Member	GO Biological Processes	GO:0043065	positive regulation of apoptotic process	-7.62834	-5.227	85/565	25,101,133,220,274,388,408,652,665,668,694,706,834,842,1687,1728,1843,1902,2308,2487,3156,3202,3297,3399,3429,3672,3717,4055,4217,4776,5159,5468,5519,5764,6196,6272,6453,7046,7052,7474,7704,8013,8398,8406,8692,8717,8878,9451,9459,9500,9759,10018,10550,10628,11214,23087,23385,25999,26471,27018,27113,27250,28984,29948,50507,51107,51147,51741,55367,57449,57580,60485,64393,80149,81618,83464,84033,904…	ABL1,ADAM8,ADM,ALDH1A3,BIN1,RHOB,ARRB1,BMP4,BNIP3L,FOXL2,BTG1,TSPO,CASP1,CASP9,DFNA5,NQO1,DUSP1,LPAR1,FOXO1,FRZB,HMGCR,HOXA5,HSF1,ID3,IFI27,ITGA1,JAK2,LTBR,MAP3K5,NFATC4,PDGFRB,PPARG,PPP2R1B,PTN,RPS6KA2,SORT1,ITSN1,TGFBR1,TGM2,WNT5A,ZBTB16,NR4A3,PLA2G6,SRPX,HYAL2,TRADD,SQSTM1,EIF2AK3,ARHGEF6,MAGED1,HDAC4,BCL2L11,ARL6IP5,TXNIP,AKAP13,TRIM35,NCSTN,CLIP3,NUPR1,BEX3,BBC3,PDCD4,RGCC,OSGIN1,NOX4,APH1A,…
16_Summary	Hallmark Gene Sets	M5934	HALLMARK XENOBIOTIC METABOLISM	-9.55496	-6.836	45/200	53,217,348,847,948,1244,1528,1593,1728,1891,2052,2114,2159,2192,2936,2948,3290,3417,3484,3487,3554,3728,4121,4128,4814,5091,5166,5226,5447,5627,5699,5730,8460,8714,8942,22949,26999,27346,51380,51635,54498,54884,55502,84913,283537	ACP2,ALDH2,APOE,CAT,CD36,ABCC2,CYB5A,CYP27A1,NQO1,ECH1,EPHX1,ETS2,F10,FBLN1,GSR,GSTM4,HSD11B1,IDH1,IGFBP1,IGFBP4,IL1R1,JUP,MAN1A1,MAOA,NINJ1,PC,PDK4,PGD,POR,PROS1,PSMB10,PTGDS,TPST1,ABCC3,KYNU,PTGR1,CYFIP2,TMEM97,CSAD,DHRS7,SMOX,RETSAT,HES6,ATOH8,SLC46A3
16_Member	Hallmark Gene Sets	M5934	HALLMARK XENOBIOTIC METABOLISM	-9.55496	-6.836	45/200	53,217,348,847,948,1244,1528,1593,1728,1891,2052,2114,2159,2192,2936,2948,3290,3417,3484,3487,3554,3728,4121,4128,4814,5091,5166,5226,5447,5627,5699,5730,8460,8714,8942,22949,26999,27346,51380,51635,54498,54884,55502,84913,283537	ACP2,ALDH2,APOE,CAT,CD36,ABCC2,CYB5A,CYP27A1,NQO1,ECH1,EPHX1,ETS2,F10,FBLN1,GSR,GSTM4,HSD11B1,IDH1,IGFBP1,IGFBP4,IL1R1,JUP,MAN1A1,MAOA,NINJ1,PC,PDK4,PGD,POR,PROS1,PSMB10,PTGDS,TPST1,ABCC3,KYNU,PTGR1,CYFIP2,TMEM97,CSAD,DHRS7,SMOX,RETSAT,HES6,ATOH8,SLC46A3
17_Summary	GO Biological Processes	GO:0019216	regulation of lipid metabolic process	-9.54094	-6.834	56/281	341,347,348,585,706,1717,1737,2170,2185,3357,3417,3490,3553,3638,3667,3949,5156,5159,5164,5166,5295,5447,5465,5468,5565,5660,5919,6095,6615,6720,6770,6777,7291,8013,8398,8503,8611,8660,9314,10062,10577,10580,22937,23417,26580,54361,57104,58526,64784,79888,94103,113791,150094,153090,254013,376497,133,1645,1728,3156,5699,8912,8942,9056,25953,56997,79934	APOC1,APOD,APOE,BBS4,TSPO,DHCR7,DLAT,FABP3,PTK2B,HTR2B,IDH1,IGFBP7,IL1B,INSIG1,IRS1,LDLR,PDGFRA,PDGFRB,PDK2,PDK4,PIK3R1,POR,PPARA,PPARG,PRKAB2,PSAP,RARRES2,RORA,SNAI1,SREBF1,STAR,STAT5B,TWIST1,NR4A3,PLA2G6,PIK3R3,PLPP1,IRS2,KLF4,NR1H3,NPC2,SORBS1,SCAP,MLYCD,BSCL2,WNT4,PNPLA2,MID1IP1,CRTC3,LPCAT1,ORMDL3,PIK3IP1,SIK1,DAB2IP,ETFBKMT,SLC27A1,ADM,AKR1C1,NQO1,HMGCR,PSMB10,CACNA1H,KYNU,SLC7A7,PNKD,COQ8A…
17_Member	GO Biological Processes	GO:0019216	regulation of lipid metabolic process	-9.54094	-6.834	56/281	341,347,348,585,706,1717,1737,2170,2185,3357,3417,3490,3553,3638,3667,3949,5156,5159,5164,5166,5295,5447,5465,5468,5565,5660,5919,6095,6615,6720,6770,6777,7291,8013,8398,8503,8611,8660,9314,10062,10577,10580,22937,23417,26580,54361,57104,58526,64784,79888,94103,113791,150094,153090,254013,376497	APOC1,APOD,APOE,BBS4,TSPO,DHCR7,DLAT,FABP3,PTK2B,HTR2B,IDH1,IGFBP7,IL1B,INSIG1,IRS1,LDLR,PDGFRA,PDGFRB,PDK2,PDK4,PIK3R1,POR,PPARA,PPARG,PRKAB2,PSAP,RARRES2,RORA,SNAI1,SREBF1,STAR,STAT5B,TWIST1,NR4A3,PLA2G6,PIK3R3,PLPP1,IRS2,KLF4,NR1H3,NPC2,SORBS1,SCAP,MLYCD,BSCL2,WNT4,PNPLA2,MID1IP1,CRTC3,LPCAT1,ORMDL3,PIK3IP1,SIK1,DAB2IP,ETFBKMT,SLC27A1
17_Member	GO Biological Processes	GO:0046890	regulation of lipid biosynthetic process	-5.10736	-3.17	27/133	341,348,706,1717,2170,3357,3417,3490,3553,3638,3949,5166,5447,5565,6615,6720,6770,8398,10062,10580,22937,54361,58526,79888,94103,150094,376497	APOC1,APOE,TSPO,DHCR7,FABP3,HTR2B,IDH1,IGFBP7,IL1B,INSIG1,LDLR,PDK4,POR,PRKAB2,SNAI1,SREBF1,STAR,PLA2G6,NR1H3,SORBS1,SCAP,WNT4,MID1IP1,LPCAT1,ORMDL3,SIK1,SLC27A1
17_Member	GO Biological Processes	GO:0019217	regulation of fatty acid metabolic process	-4.77061	-2.896	19/80	341,1737,2170,3638,3667,5164,5166,5465,5468,5565,6720,7291,8013,8660,10062,22937,23417,58526,254013	APOC1,DLAT,FABP3,INSIG1,IRS1,PDK2,PDK4,PPARA,PPARG,PRKAB2,SREBF1,TWIST1,NR4A3,IRS2,NR1H3,SCAP,MLYCD,MID1IP1,ETFBKMT
17_Member	GO Biological Processes	GO:0045834	positive regulation of lipid metabolic process	-4.66087	-2.815	25/125	341,348,2170,2185,3357,3553,3667,3949,5156,5159,5447,5465,5468,6720,6770,7291,8013,8398,8660,10062,10580,23417,54361,57104,58526	APOC1,APOE,FABP3,PTK2B,HTR2B,IL1B,IRS1,LDLR,PDGFRA,PDGFRB,POR,PPARA,PPARG,SREBF1,STAR,TWIST1,NR4A3,PLA2G6,IRS2,NR1H3,SORBS1,MLYCD,WNT4,PNPLA2,MID1IP1
17_Member	GO Biological Processes	GO:0042180	cellular ketone metabolic process	-3.15862	-1.648	33/225	133,341,1645,1728,1737,2170,3156,3638,3667,5164,5166,5465,5468,5565,5699,6720,6770,6777,7291,8013,8660,8912,8942,9056,10062,22937,23417,25953,54361,56997,58526,79934,254013	ADM,APOC1,AKR1C1,NQO1,DLAT,FABP3,HMGCR,INSIG1,IRS1,PDK2,PDK4,PPARA,PPARG,PRKAB2,PSMB10,SREBF1,STAR,STAT5B,TWIST1,NR4A3,IRS2,CACNA1H,KYNU,SLC7A7,NR1H3,SCAP,MLYCD,PNKD,WNT4,COQ8A,MID1IP1,COQ8B,ETFBKMT
17_Member	GO Biological Processes	GO:0046889	positive regulation of lipid biosynthetic process	-2.90307	-1.46	13/62	348,2170,3357,3553,3949,5447,6720,6770,8398,10062,10580,54361,58526	APOE,FABP3,HTR2B,IL1B,LDLR,POR,SREBF1,STAR,PLA2G6,NR1H3,SORBS1,WNT4,MID1IP1
17_Member	GO Biological Processes	GO:0010565	regulation of cellular ketone metabolic process	-2.5876	-1.237	24/160	341,1728,1737,2170,3638,3667,5164,5166,5465,5468,5565,5699,6720,6770,7291,8013,8660,9056,10062,22937,23417,54361,58526,254013	APOC1,NQO1,DLAT,FABP3,INSIG1,IRS1,PDK2,PDK4,PPARA,PPARG,PRKAB2,PSMB10,SREBF1,STAR,TWIST1,NR4A3,IRS2,SLC7A7,NR1H3,SCAP,MLYCD,WNT4,MID1IP1,ETFBKMT
18_Summary	GO Biological Processes	GO:0097190	apoptotic signaling pathway	-9.4039	-6.709	91/571	25,409,624,652,665,837,842,1026,1051,1191,1491,1616,1655,1687,2065,2081,2534,2537,2730,2872,3082,3383,3429,3553,3570,3708,3717,4055,4217,4254,4776,4929,5025,5164,5295,5519,5552,5598,6272,6387,6615,6648,6750,6880,7046,7133,7466,7857,7917,8398,8406,8692,8717,8764,8794,8996,9451,9500,10018,10550,10961,11337,23643,25946,26471,27018,27113,27242,27315,28996,50484,51741,54361,54541,54929,55367,56917,604…	ABL1,ARRB2,BDKRB2,BMP4,BNIP3L,CASP4,CASP9,CDKN1A,CEBPB,CLU,CTH,DAXX,DDX5,DFNA5,ERBB3,ERN1,FYN,IFI6,GCLM,MKNK2,HGF,ICAM1,IFI27,IL1B,IL6R,ITPR1,JAK2,LTBR,MAP3K5,KITLG,NFATC4,NR4A2,P2RX4,PDK2,PIK3R1,PPP2R1B,SRGN,MAPK7,SORT1,CXCL12,SNAI1,SOD2,SST,TAF9,TGFBR1,TNFRSF1B,WFS1,SCG2,BAG6,PLA2G6,SRPX,HYAL2,TRADD,TNFRSF14,TNFRSF10C,NOL3,EIF2AK3,MAGED1,BCL2L11,ARL6IP5,ERP29,GABARAP,LY96,ZNF385A,NUPR1,BEX3,BBC…
18_Member	GO Biological Processes	GO:0097190	apoptotic signaling pathway	-9.4039	-6.709	91/571	25,409,624,652,665,837,842,1026,1051,1191,1491,1616,1655,1687,2065,2081,2534,2537,2730,2872,3082,3383,3429,3553,3570,3708,3717,4055,4217,4254,4776,4929,5025,5164,5295,5519,5552,5598,6272,6387,6615,6648,6750,6880,7046,7133,7466,7857,7917,8398,8406,8692,8717,8764,8794,8996,9451,9500,10018,10550,10961,11337,23643,25946,26471,27018,27113,27242,27315,28996,50484,51741,54361,54541,54929,55367,56917,604…	ABL1,ARRB2,BDKRB2,BMP4,BNIP3L,CASP4,CASP9,CDKN1A,CEBPB,CLU,CTH,DAXX,DDX5,DFNA5,ERBB3,ERN1,FYN,IFI6,GCLM,MKNK2,HGF,ICAM1,IFI27,IL1B,IL6R,ITPR1,JAK2,LTBR,MAP3K5,KITLG,NFATC4,NR4A2,P2RX4,PDK2,PIK3R1,PPP2R1B,SRGN,MAPK7,SORT1,CXCL12,SNAI1,SOD2,SST,TAF9,TGFBR1,TNFRSF1B,WFS1,SCG2,BAG6,PLA2G6,SRPX,HYAL2,TRADD,TNFRSF14,TNFRSF10C,NOL3,EIF2AK3,MAGED1,BCL2L11,ARL6IP5,ERP29,GABARAP,LY96,ZNF385A,NUPR1,BEX3,BBC…
18_Member	GO Biological Processes	GO:0097193	intrinsic apoptotic signaling pathway	-5.28686	-3.31	45/275	25,624,837,842,1026,1051,1191,1655,1687,2081,3708,3717,4217,4776,5164,5295,5598,6387,6615,6648,6880,7133,7466,7917,8996,9451,10018,10550,10961,25946,26471,27113,27315,28996,50484,51741,54541,54929,60401,64393,79094,90427,120892,133746,153090	ABL1,BDKRB2,CASP4,CASP9,CDKN1A,CEBPB,CLU,DDX5,DFNA5,ERN1,ITPR1,JAK2,MAP3K5,NFATC4,PDK2,PIK3R1,MAPK7,CXCL12,SNAI1,SOD2,TAF9,TNFRSF1B,WFS1,BAG6,NOL3,EIF2AK3,BCL2L11,ARL6IP5,ERP29,ZNF385A,NUPR1,BBC3,PGAP2,HIPK2,RRM2B,WWOX,DDIT4,TMEM161A,EDA2R,ZMAT3,CHAC1,BMF,LRRK2,JMY,DAB2IP
18_Member	GO Biological Processes	GO:2001233	regulation of apoptotic signaling pathway	-3.98293	-2.268	51/365	409,624,652,1191,1491,1687,2534,2537,2730,3082,3383,3553,3717,4055,4776,4929,5519,5598,6387,6615,6648,6880,7046,7466,7857,8398,8406,8692,8717,8996,9451,9500,10018,10961,25946,27113,27315,50484,51741,54361,54929,55367,56917,64798,81618,90427,94241,120892,153090,246330,284114	ARRB2,BDKRB2,BMP4,CLU,CTH,DFNA5,FYN,IFI6,GCLM,HGF,ICAM1,IL1B,JAK2,LTBR,NFATC4,NR4A2,PPP2R1B,MAPK7,CXCL12,SNAI1,SOD2,TAF9,TGFBR1,WFS1,SCG2,PLA2G6,SRPX,HYAL2,TRADD,NOL3,EIF2AK3,MAGED1,BCL2L11,ERP29,ZNF385A,BBC3,PGAP2,RRM2B,WWOX,WNT4,TMEM161A,PIDD1,MEIS3,DEPTOR,ITM2C,BMF,TP53INP1,LRRK2,DAB2IP,PELI3,TMEM102
18_Member	GO Biological Processes	GO:0072332	intrinsic apoptotic signaling pathway by p53 class mediator	-3.3299	-1.762	16/78	624,1026,1655,5164,6880,7917,25946,26471,27315,28996,50484,51741,54541,60401,64393,133746	BDKRB2,CDKN1A,DDX5,PDK2,TAF9,BAG6,ZNF385A,NUPR1,PGAP2,HIPK2,RRM2B,WWOX,DDIT4,EDA2R,ZMAT3,JMY
18_Member	GO Biological Processes	GO:0008630	intrinsic apoptotic signaling pathway in response to DNA damage	-3.17425	-1.66	18/96	25,842,1026,1191,4776,5295,6387,6615,6880,7133,7917,10018,25946,26471,27315,28996,54541,54929	ABL1,CASP9,CDKN1A,CLU,NFATC4,PIK3R1,CXCL12,SNAI1,TAF9,TNFRSF1B,BAG6,BCL2L11,ZNF385A,NUPR1,PGAP2,HIPK2,DDIT4,TMEM161A
18_Member	GO Biological Processes	GO:2001234	negative regulation of apoptotic signaling pathway	-3.12256	-1.628	30/199	409,624,652,1191,1491,2534,2537,2730,3082,3383,3553,4929,5598,6387,6615,6648,6880,7046,7466,7857,8717,8996,25946,27315,50484,54361,54929,56917,120892,246330	ARRB2,BDKRB2,BMP4,CLU,CTH,FYN,IFI6,GCLM,HGF,ICAM1,IL1B,NR4A2,MAPK7,CXCL12,SNAI1,SOD2,TAF9,TGFBR1,WFS1,SCG2,TRADD,NOL3,ZNF385A,PGAP2,RRM2B,WNT4,TMEM161A,MEIS3,LRRK2,PELI3
18_Member	GO Biological Processes	GO:1902230	negative regulation of intrinsic apoptotic signaling pathway in response to DNA damage	-2.21997	-0.983	46935	1191,6387,6615,6880,25946,27315,54929	CLU,CXCL12,SNAI1,TAF9,ZNF385A,PGAP2,TMEM161A
18_Member	GO Biological Processes	GO:2001243	negative regulation of intrinsic apoptotic signaling pathway	-2.02996	-0.851	14/86	624,1191,5598,6387,6615,6648,6880,7466,8996,25946,27315,50484,54929,120892	BDKRB2,CLU,MAPK7,CXCL12,SNAI1,SOD2,TAF9,WFS1,NOL3,ZNF385A,PGAP2,RRM2B,TMEM161A,LRRK2
19_Summary	Hallmark Gene Sets	M5902	HALLMARK APOPTOSIS	-9.36102	-6.678	39/161	388,665,706,834,837,842,1026,1191,1491,1634,2064,2065,2232,2878,2879,2936,3082,3459,3553,3669,4060,5159,5327,5538,6041,6303,6304,6309,6648,6890,7049,7832,8878,10018,10410,10628,27250,54884,90427	RHOB,BNIP3L,TSPO,CASP1,CASP4,CASP9,CDKN1A,CLU,CTH,DCN,ERBB2,ERBB3,FDXR,GPX3,GPX4,GSR,HGF,IFNGR1,IL1B,ISG20,LUM,PDGFRB,PLAT,PPT1,RNASEL,SAT1,SATB1,SC5D,SOD2,TAP1,TGFBR3,BTG2,SQSTM1,BCL2L11,IFITM3,TXNIP,PDCD4,RETSAT,BMF
19_Member	Hallmark Gene Sets	M5902	HALLMARK APOPTOSIS	-9.36102	-6.678	39/161	388,665,706,834,837,842,1026,1191,1491,1634,2064,2065,2232,2878,2879,2936,3082,3459,3553,3669,4060,5159,5327,5538,6041,6303,6304,6309,6648,6890,7049,7832,8878,10018,10410,10628,27250,54884,90427	RHOB,BNIP3L,TSPO,CASP1,CASP4,CASP9,CDKN1A,CLU,CTH,DCN,ERBB2,ERBB3,FDXR,GPX3,GPX4,GSR,HGF,IFNGR1,IL1B,ISG20,LUM,PDGFRB,PLAT,PPT1,RNASEL,SAT1,SATB1,SC5D,SOD2,TAP1,TGFBR3,BTG2,SQSTM1,BCL2L11,IFITM3,TXNIP,PDCD4,RETSAT,BMF
20_Summary	GO Biological Processes	GO:0019752	carboxylic acid metabolic process	-9.29098	-6.63	132/946	18,35,47,220,224,230,275,341,1201,1244,1373,1390,1491,1497,1528,1593,1632,1634,1645,1728,1737,1891,2170,2194,2678,2686,2730,2879,2946,3176,3417,3425,3638,3643,3667,3992,4191,4258,4329,4524,5066,5091,5164,5166,5191,5226,5445,5447,5465,5468,5565,5699,5730,5742,6307,6309,6319,6535,6720,6770,6774,6776,6777,7291,7360,7407,8013,8660,8864,8942,9056,9261,9415,9759,10062,10090,10157,10588,10826,10840,1096…	ABAT,ACADS,ACLY,ALDH1A3,ALDH3A2,ALDOC,AMT,APOC1,CLN3,ABCC2,CPS1,CREM,CTH,CTNS,CYB5A,CYP27A1,ECI1,DCN,AKR1C1,NQO1,DLAT,ECH1,FABP3,FASN,GGT1,GGT7,GCLM,GPX4,GSTM2,HNMT,IDH1,IDUA,INSIG1,INSR,IRS1,FADS1,MDH2,MGST2,ALDH6A1,MTHFR,PAM,PC,PDK2,PDK4,PEX7,PGD,PON2,POR,PPARA,PPARG,PRKAB2,PSMB10,PTGDS,PTGS1,MSMO1,SC5D,SCD,SLC6A8,SREBF1,STAR,STAT3,STAT5A,STAT5B,TWIST1,UGP2,VARS,NR4A3,IRS2,PER2,KYNU,SLC7A7,MAPK…
20_Member	GO Biological Processes	GO:0019752	carboxylic acid metabolic process	-9.29098	-6.63	132/946	18,35,47,220,224,230,275,341,1201,1244,1373,1390,1491,1497,1528,1593,1632,1634,1645,1728,1737,1891,2170,2194,2678,2686,2730,2879,2946,3176,3417,3425,3638,3643,3667,3992,4191,4258,4329,4524,5066,5091,5164,5166,5191,5226,5445,5447,5465,5468,5565,5699,5730,5742,6307,6309,6319,6535,6720,6770,6774,6776,6777,7291,7360,7407,8013,8660,8864,8942,9056,9261,9415,9759,10062,10090,10157,10588,10826,10840,1096…	ABAT,ACADS,ACLY,ALDH1A3,ALDH3A2,ALDOC,AMT,APOC1,CLN3,ABCC2,CPS1,CREM,CTH,CTNS,CYB5A,CYP27A1,ECI1,DCN,AKR1C1,NQO1,DLAT,ECH1,FABP3,FASN,GGT1,GGT7,GCLM,GPX4,GSTM2,HNMT,IDH1,IDUA,INSIG1,INSR,IRS1,FADS1,MDH2,MGST2,ALDH6A1,MTHFR,PAM,PC,PDK2,PDK4,PEX7,PGD,PON2,POR,PPARA,PPARG,PRKAB2,PSMB10,PTGDS,PTGS1,MSMO1,SC5D,SCD,SLC6A8,SREBF1,STAR,STAT3,STAT5A,STAT5B,TWIST1,UGP2,VARS,NR4A3,IRS2,PER2,KYNU,SLC7A7,MAPK…
20_Member	GO Biological Processes	GO:0044283	small molecule biosynthetic process	-9.28946	-6.63	85/522	18,47,133,220,230,341,348,1373,1491,1593,1595,1634,1717,1718,2185,2194,2308,2539,2629,2648,2678,2686,3156,3157,3422,3553,3613,3638,3953,3992,4047,4191,4258,4485,4597,4598,5091,5164,5166,5226,5360,5447,5465,5565,5730,5742,6307,6309,6319,6615,6713,6720,6770,7108,7360,8864,8912,8942,9415,10062,10090,10588,10826,11161,22937,23417,23743,50814,51477,51478,54361,55501,55902,56898,56997,58526,79934,83667…	ABAT,ACLY,ADM,ALDH1A3,ALDOC,APOC1,APOE,CPS1,CTH,CYP27A1,CYP51A1,DCN,DHCR7,DHCR24,PTK2B,FASN,FOXO1,G6PD,GBA,KAT2A,GGT1,GGT7,HMGCR,HMGCS1,IDI1,IL1B,IMPA2,INSIG1,LEPR,FADS1,LSS,MDH2,MGST2,MST1,MVD,MVK,PC,PDK2,PDK4,PGD,PLTP,POR,PPARA,PRKAB2,PTGDS,PTGS1,MSMO1,SC5D,SCD,SNAI1,SQLE,SREBF1,STAR,TM7SF2,UGP2,PER2,CACNA1H,KYNU,FADS2,NR1H3,UST,MTHFS,FAXDC2,C14orf1,SCAP,MLYCD,BHMT2,NSDHL,ISYNA1,HSD17B7,WNT4,CH…
20_Member	GO Biological Processes	GO:0032787	monocarboxylic acid metabolic process	-9.22851	-6.587	89/558	18,35,47,220,224,230,275,341,1244,1390,1593,1632,1634,1645,1737,1891,2170,2194,2879,2946,3417,3425,3638,3643,3667,3992,5066,5091,5164,5166,5191,5226,5445,5447,5465,5468,5565,5730,5742,6307,6309,6319,6720,6770,6774,6776,6777,7291,8013,8660,8864,8942,9415,9759,10062,10090,10588,10826,10965,22937,22949,23175,23417,25874,25953,51601,54541,55268,55501,55902,56898,58526,59342,64900,83440,83667,84266,84…	ABAT,ACADS,ACLY,ALDH1A3,ALDH3A2,ALDOC,AMT,APOC1,ABCC2,CREM,CYP27A1,ECI1,DCN,AKR1C1,DLAT,ECH1,FABP3,FASN,GPX4,GSTM2,IDH1,IDUA,INSIG1,INSR,IRS1,FADS1,PAM,PC,PDK2,PDK4,PEX7,PGD,PON2,POR,PPARA,PPARG,PRKAB2,PTGDS,PTGS1,MSMO1,SC5D,SCD,SREBF1,STAR,STAT3,STAT5A,STAT5B,TWIST1,NR4A3,IRS2,PER2,KYNU,FADS2,HDAC4,NR1H3,UST,MTHFS,FAXDC2,ACOT2,SCAP,PTGR1,LPIN1,MLYCD,MPC2,PNKD,LIPT1,DDIT4,ECHDC2,CHST12,ACSS2,BDH2…
20_Member	GO Biological Processes	GO:0006631	fatty acid metabolic process	-7.7511	-5.315	60/346	35,47,224,341,1390,1632,1737,1891,2170,2194,2879,2946,3638,3667,3992,5066,5164,5166,5191,5445,5447,5465,5468,5565,5730,5742,6307,6309,6319,6720,6776,6777,7291,8013,8660,8864,9415,10062,10826,10965,22937,22949,23175,23417,55268,55902,56898,58526,64900,83667,84266,84532,84693,114757,126129,132949,254013,285440,376497,641371	ACADS,ACLY,ALDH3A2,APOC1,CREM,ECI1,DLAT,ECH1,FABP3,FASN,GPX4,GSTM2,INSIG1,IRS1,FADS1,PAM,PDK2,PDK4,PEX7,PON2,POR,PPARA,PPARG,PRKAB2,PTGDS,PTGS1,MSMO1,SC5D,SCD,SREBF1,STAT5A,STAT5B,TWIST1,NR4A3,IRS2,PER2,FADS2,NR1H3,FAXDC2,ACOT2,SCAP,PTGR1,LPIN1,MLYCD,ECHDC2,ACSS2,BDH2,MID1IP1,LPIN3,SESN2,ALKBH7,ACSS1,MCEE,CYGB,CPT1C,AASDH,ETFBKMT,CYP4V2,SLC27A1,ACOT1
20_Member	GO Biological Processes	GO:0072330	monocarboxylic acid biosynthetic process	-3.23332	-1.703	30/196	18,47,220,341,1593,1634,2194,3638,3992,5166,5565,5730,5742,6307,6309,6319,6770,8864,9415,10062,10090,10826,22937,23417,55501,55902,58526,84532,92126,157506	ABAT,ACLY,ALDH1A3,APOC1,CYP27A1,DCN,FASN,INSIG1,FADS1,PDK4,PRKAB2,PTGDS,PTGS1,MSMO1,SC5D,SCD,STAR,PER2,FADS2,NR1H3,UST,FAXDC2,SCAP,MLYCD,CHST12,ACSS2,MID1IP1,ACSS1,DSEL,RDH10
20_Member	GO Biological Processes	GO:0046394	carboxylic acid biosynthetic process	-2.75512	-1.352	40/304	18,47,220,341,1373,1491,1593,1634,2194,2678,2686,3638,3992,4258,5166,5565,5730,5742,6307,6309,6319,6770,7360,8864,8942,9415,10062,10090,10588,10826,22937,23417,23743,55501,55902,58526,84532,92126,157506,200895	ABAT,ACLY,ALDH1A3,APOC1,CPS1,CTH,CYP27A1,DCN,FASN,GGT1,GGT7,INSIG1,FADS1,MGST2,PDK4,PRKAB2,PTGDS,PTGS1,MSMO1,SC5D,SCD,STAR,UGP2,PER2,KYNU,FADS2,NR1H3,UST,MTHFS,FAXDC2,SCAP,MLYCD,BHMT2,CHST12,ACSS2,MID1IP1,ACSS1,DSEL,RDH10,DHFR2
20_Member	GO Biological Processes	GO:0016053	organic acid biosynthetic process	-2.75512	-1.352	40/304	18,47,220,341,1373,1491,1593,1634,2194,2678,2686,3638,3992,4258,5166,5565,5730,5742,6307,6309,6319,6770,7360,8864,8942,9415,10062,10090,10588,10826,22937,23417,23743,55501,55902,58526,84532,92126,157506,200895	ABAT,ACLY,ALDH1A3,APOC1,CPS1,CTH,CYP27A1,DCN,FASN,GGT1,GGT7,INSIG1,FADS1,MGST2,PDK4,PRKAB2,PTGDS,PTGS1,MSMO1,SC5D,SCD,STAR,UGP2,PER2,KYNU,FADS2,NR1H3,UST,MTHFS,FAXDC2,SCAP,MLYCD,BHMT2,CHST12,ACSS2,MID1IP1,ACSS1,DSEL,RDH10,DHFR2
20_Member	GO Biological Processes	GO:0006633	fatty acid biosynthetic process	-2.41464	-1.112	20/129	47,341,2194,3638,3992,5166,5565,5730,5742,6307,6309,6319,9415,10062,10826,22937,23417,55902,58526,84532	ACLY,APOC1,FASN,INSIG1,FADS1,PDK4,PRKAB2,PTGDS,PTGS1,MSMO1,SC5D,SCD,FADS2,NR1H3,FAXDC2,SCAP,MLYCD,ACSS2,MID1IP1,ACSS1

## Sheet: Suppl Table 3C ESFto3dDOWN META
GroupID	Category	Term	Description	LogP	Log(q-value)	InTerm_InList	Genes	Symbols
1_Summary	Hallmark Gene Sets	M5925	HALLMARK E2F TARGETS	-100	-96.351	141/200	332,580,672,675,701,983,991,993,1029,1031,1033,1062,1163,1434,1503,1633,1786,1965,2146,2935,3014,3015,3070,3148,3149,3159,3161,3184,3609,3835,3925,3978,4001,4085,4171,4172,4173,4174,4175,4176,4288,4361,4436,4605,4678,4830,5036,5111,5347,5411,5424,5426,5558,5591,5631,5885,5901,5902,5983,6117,6119,6241,6426,6427,6434,6628,6749,6790,6839,7083,7112,7153,7283,7374,7398,7884,7913,8243,8914,9126,9133,92…	BIRC5,BARD1,BRCA1,BRCA2,BUB1B,CDK1,CDC20,CDC25A,CDKN2A,CDKN2C,CDKN3,CENPE,CKS1B,CSE1L,CTPS1,DCK,DNMT1,EIF2S1,EZH2,GSPT1,H2AFX,H2AFZ,HELLS,HMGB2,HMGB3,HMGA1,HMMR,HNRNPD,ILF3,KIF22,STMN1,LIG1,LMNB1,MAD2L1,MCM2,MCM3,MCM4,MCM5,MCM6,MCM7,MKI67,MRE11,MSH2,MYBL2,NASP,NME1,PA2G4,PCNA,PLK1,PNN,POLD1,POLE,PRIM2,PRKDC,PRPS1,RAD21,RAN,RANBP1,RFC3,RPA1,RPA3,RRM2,SRSF1,SRSF2,TRA2B,SNRPB,SSRP1,AURKA,SUV39H1,TK1…
1_Member	Hallmark Gene Sets	M5925	HALLMARK E2F TARGETS	-100	-96.351	141/200	332,580,672,675,701,983,991,993,1029,1031,1033,1062,1163,1434,1503,1633,1786,1965,2146,2935,3014,3015,3070,3148,3149,3159,3161,3184,3609,3835,3925,3978,4001,4085,4171,4172,4173,4174,4175,4176,4288,4361,4436,4605,4678,4830,5036,5111,5347,5411,5424,5426,5558,5591,5631,5885,5901,5902,5983,6117,6119,6241,6426,6427,6434,6628,6749,6790,6839,7083,7112,7153,7283,7374,7398,7884,7913,8243,8914,9126,9133,92…	BIRC5,BARD1,BRCA1,BRCA2,BUB1B,CDK1,CDC20,CDC25A,CDKN2A,CDKN2C,CDKN3,CENPE,CKS1B,CSE1L,CTPS1,DCK,DNMT1,EIF2S1,EZH2,GSPT1,H2AFX,H2AFZ,HELLS,HMGB2,HMGB3,HMGA1,HMMR,HNRNPD,ILF3,KIF22,STMN1,LIG1,LMNB1,MAD2L1,MCM2,MCM3,MCM4,MCM5,MCM6,MCM7,MKI67,MRE11,MSH2,MYBL2,NASP,NME1,PA2G4,PCNA,PLK1,PNN,POLD1,POLE,PRIM2,PRKDC,PRPS1,RAD21,RAN,RANBP1,RFC3,RPA1,RPA3,RRM2,SRSF1,SRSF2,TRA2B,SNRPB,SSRP1,AURKA,SUV39H1,TK1…
1_Member	Hallmark Gene Sets	M5901	HALLMARK G2M CHECKPOINT	-89.787	-86.314	116/200	332,580,595,675,699,890,899,983,990,991,993,1031,1033,1058,1062,1063,1163,1736,1841,1869,1870,1950,2130,2146,2935,3014,3015,3149,3151,3159,3161,3184,3609,3619,3799,3832,3835,3837,3925,4001,4085,4171,4172,4174,4175,4288,4331,4502,4605,4678,4691,4751,5347,5426,5558,5885,5933,6426,6427,6434,6491,6541,6632,6790,6839,7027,7112,7153,7272,7371,7468,8140,8243,8317,8318,8438,9055,9133,9156,9184,9212,9232,…	BIRC5,BARD1,CCND1,BRCA2,BUB1,CCNA2,CCNF,CDK1,CDC6,CDC20,CDC25A,CDKN2C,CDKN3,CENPA,CENPE,CENPF,CKS1B,DKC1,DTYMK,E2F1,E2F2,EGF,EWSR1,EZH2,GSPT1,H2AFX,H2AFZ,HMGB3,HMGN2,HMGA1,HMMR,HNRNPD,ILF3,INCENP,KIF5B,KIF11,KIF22,KPNB1,STMN1,LMNB1,MAD2L1,MCM2,MCM3,MCM5,MCM6,MKI67,MNAT1,MT2A,MYBL2,NASP,NCL,NEK2,PLK1,POLE,PRIM2,RAD21,RBL1,SRSF1,SRSF2,TRA2B,STIL,SLC7A1,SNRPD1,AURKA,SUV39H1,TFDP1,TMPO,TOP2A,TTK,UCK2…
2_Summary	Reactome Gene Sets	R-HSA-1640170	Cell Cycle	-100	-96.351	217/635	332,580,595,641,672,675,699,701,890,891,983,990,991,993,995,1017,1021,1029,1031,1032,1058,1062,1063,1163,1719,1736,1763,1778,1869,1870,2237,2305,2491,3014,3015,3161,3320,3619,3978,4000,4001,4085,4171,4172,4173,4174,4175,4176,4331,4361,4605,4751,4869,4927,4998,5111,5116,5347,5422,5424,5426,5427,5501,5557,5558,5700,5702,5705,5708,5717,5885,5888,5932,5933,5983,5984,5985,6117,6119,6241,6418,6790,7027…	BIRC5,BARD1,CCND1,BLM,BRCA1,BRCA2,BUB1,BUB1B,CCNA2,CCNB1,CDK1,CDC6,CDC20,CDC25A,CDC25C,CDK2,CDK6,CDKN2A,CDKN2C,CDKN2D,CENPA,CENPE,CENPF,CKS1B,DHFR,DKC1,DNA2,DYNC1H1,E2F1,E2F2,FEN1,FOXM1,CENPI,H2AFX,H2AFZ,HMMR,HSP90AA1,INCENP,LIG1,LMNA,LMNB1,MAD2L1,MCM2,MCM3,MCM4,MCM5,MCM6,MCM7,MNAT1,MRE11,MYBL2,NEK2,NPM1,NUP88,ORC1,PCNA,PCNT,PLK1,POLA1,POLD1,POLE,POLE2,PPP1CC,PRIM1,PRIM2,PSMC1,PSMC3,PSMC5,PSMD2,P…
2_Member	Reactome Gene Sets	R-HSA-1640170	Cell Cycle	-100	-96.351	217/635	332,580,595,641,672,675,699,701,890,891,983,990,991,993,995,1017,1021,1029,1031,1032,1058,1062,1063,1163,1719,1736,1763,1778,1869,1870,2237,2305,2491,3014,3015,3161,3320,3619,3978,4000,4001,4085,4171,4172,4173,4174,4175,4176,4331,4361,4605,4751,4869,4927,4998,5111,5116,5347,5422,5424,5426,5427,5501,5557,5558,5700,5702,5705,5708,5717,5885,5888,5932,5933,5983,5984,5985,6117,6119,6241,6418,6790,7027…	BIRC5,BARD1,CCND1,BLM,BRCA1,BRCA2,BUB1,BUB1B,CCNA2,CCNB1,CDK1,CDC6,CDC20,CDC25A,CDC25C,CDK2,CDK6,CDKN2A,CDKN2C,CDKN2D,CENPA,CENPE,CENPF,CKS1B,DHFR,DKC1,DNA2,DYNC1H1,E2F1,E2F2,FEN1,FOXM1,CENPI,H2AFX,H2AFZ,HMMR,HSP90AA1,INCENP,LIG1,LMNA,LMNB1,MAD2L1,MCM2,MCM3,MCM4,MCM5,MCM6,MCM7,MNAT1,MRE11,MYBL2,NEK2,NPM1,NUP88,ORC1,PCNA,PCNT,PLK1,POLA1,POLD1,POLE,POLE2,PPP1CC,PRIM1,PRIM2,PSMC1,PSMC3,PSMC5,PSMD2,P…
2_Member	GO Biological Processes	GO:1903047	mitotic cell cycle process	-100	-96.351	252/901	328,329,330,332,387,595,596,641,699,701,858,890,891,899,983,990,991,993,995,1017,1021,1029,1031,1032,1033,1058,1062,1063,1104,1163,1719,1763,1778,1869,1906,1950,1978,2146,2305,2669,2935,3070,3161,3265,3320,3398,3619,3688,3832,3835,3837,3925,3978,4000,4085,4171,4172,4173,4174,4175,4176,4288,4331,4361,4436,4605,4739,4751,4869,4927,4998,5111,5116,5347,5422,5426,5427,5557,5558,5569,5591,5700,5702,570…	APEX1,BIRC2,BIRC3,BIRC5,RHOA,CCND1,BCL2,BLM,BUB1,BUB1B,CAV2,CCNA2,CCNB1,CCNF,CDK1,CDC6,CDC20,CDC25A,CDC25C,CDK2,CDK6,CDKN2A,CDKN2C,CDKN2D,CDKN3,CENPA,CENPE,CENPF,RCC1,CKS1B,DHFR,DNA2,DYNC1H1,E2F1,EDN1,EGF,EIF4EBP1,EZH2,FOXM1,GEM,GSPT1,HELLS,HMMR,HRAS,HSP90AA1,ID2,INCENP,ITGB1,KIF11,KIF22,KPNB1,STMN1,LIG1,LMNA,MAD2L1,MCM2,MCM3,MCM4,MCM5,MCM6,MCM7,MKI67,MNAT1,MRE11,MSH2,MYBL2,NEDD9,NEK2,NPM1,NUP88,…
2_Member	GO Biological Processes	GO:0000278	mitotic cell cycle	-100	-96.351	262/992	328,329,330,332,387,440,595,596,641,675,699,701,858,890,891,899,983,990,991,993,995,1017,1021,1029,1031,1032,1033,1058,1062,1063,1104,1163,1719,1763,1778,1869,1906,1950,1978,2146,2305,2669,2935,3070,3161,3265,3320,3398,3619,3688,3832,3835,3837,3925,3978,4000,4085,4171,4172,4173,4174,4175,4176,4288,4331,4361,4436,4603,4605,4739,4751,4824,4869,4927,4998,5058,5111,5116,5347,5422,5426,5427,5557,5558,…	APEX1,BIRC2,BIRC3,BIRC5,RHOA,ASNS,CCND1,BCL2,BLM,BRCA2,BUB1,BUB1B,CAV2,CCNA2,CCNB1,CCNF,CDK1,CDC6,CDC20,CDC25A,CDC25C,CDK2,CDK6,CDKN2A,CDKN2C,CDKN2D,CDKN3,CENPA,CENPE,CENPF,RCC1,CKS1B,DHFR,DNA2,DYNC1H1,E2F1,EDN1,EGF,EIF4EBP1,EZH2,FOXM1,GEM,GSPT1,HELLS,HMMR,HRAS,HSP90AA1,ID2,INCENP,ITGB1,KIF11,KIF22,KPNB1,STMN1,LIG1,LMNA,MAD2L1,MCM2,MCM3,MCM4,MCM5,MCM6,MCM7,MKI67,MNAT1,MRE11,MSH2,MYBL1,MYBL2,NEDD9…
2_Member	Reactome Gene Sets	R-HSA-69278	Cell Cycle, Mitotic	-95.0577	-91.506	185/528	332,595,699,701,890,891,983,990,991,993,995,1017,1021,1029,1031,1032,1058,1062,1063,1163,1719,1763,1778,1869,1870,2237,2305,2491,3014,3015,3161,3320,3619,3978,4000,4001,4085,4171,4172,4173,4174,4175,4176,4331,4605,4751,4927,4998,5111,5116,5347,5422,5424,5426,5427,5501,5557,5558,5700,5702,5705,5708,5717,5885,5933,5983,5984,5985,6117,6119,6241,6418,6790,7027,7112,7153,7283,7298,7443,8243,8317,8318,…	BIRC5,CCND1,BUB1,BUB1B,CCNA2,CCNB1,CDK1,CDC6,CDC20,CDC25A,CDC25C,CDK2,CDK6,CDKN2A,CDKN2C,CDKN2D,CENPA,CENPE,CENPF,CKS1B,DHFR,DNA2,DYNC1H1,E2F1,E2F2,FEN1,FOXM1,CENPI,H2AFX,H2AFZ,HMMR,HSP90AA1,INCENP,LIG1,LMNA,LMNB1,MAD2L1,MCM2,MCM3,MCM4,MCM5,MCM6,MCM7,MNAT1,MYBL2,NEK2,NUP88,ORC1,PCNA,PCNT,PLK1,POLA1,POLD1,POLE,POLE2,PPP1CC,PRIM1,PRIM2,PSMC1,PSMC3,PSMC5,PSMD2,PSMD11,RAD21,RBL1,RFC3,RFC4,RFC5,RPA1,R…
2_Member	GO Biological Processes	GO:0000280	nuclear division	-75.6221	-72.216	176/604	329,330,332,387,675,699,701,858,890,891,899,983,990,991,993,995,1017,1058,1062,1063,1104,1778,1906,1950,2067,2175,2177,2669,2956,3070,3619,3832,3835,3837,3925,3955,4085,4288,4361,4605,4739,4751,4927,5116,5347,5885,5888,5901,5902,5932,6491,6790,7153,7272,7443,7516,7517,8089,8091,8243,8438,8914,9055,9088,9126,9133,9134,9181,9184,9212,9232,9319,9493,9585,9700,9735,9787,9793,9918,9928,10051,10096,100…	BIRC2,BIRC3,BIRC5,RHOA,BRCA2,BUB1,BUB1B,CAV2,CCNA2,CCNB1,CCNF,CDK1,CDC6,CDC20,CDC25A,CDC25C,CDK2,CENPA,CENPE,CENPF,RCC1,DYNC1H1,EDN1,EGF,ERCC1,FANCA,FANCD2,GEM,MSH6,HELLS,INCENP,KIF11,KIF22,KPNB1,STMN1,LFNG,MAD2L1,MKI67,MRE11,MYBL2,NEDD9,NEK2,NUP88,PCNT,PLK1,RAD21,RAD51,RAN,RANBP1,RBBP8,STIL,AURKA,TOP2A,TTK,VRK1,XRCC2,XRCC3,YEATS4,HMGA2,SMC1A,RAD54L,TIMELESS,PRC1,PKMYT1,SMC3,CCNB2,CCNE2,ARHGEF2,B…
2_Member	GO Biological Processes	GO:0007067	mitotic nuclear division	-74.006	-70.658	153/463	329,330,332,387,699,701,858,890,891,899,983,990,991,993,995,1017,1058,1062,1063,1104,1778,1906,1950,2669,3070,3619,3832,3835,3837,3925,4085,4288,4605,4739,4751,4927,5116,5347,5885,5901,5902,5932,6491,6790,7272,7443,7517,8089,8091,8243,8914,9055,9088,9126,9133,9181,9184,9212,9232,9493,9585,9700,9735,9787,9793,9918,9928,10051,10381,10403,10426,10460,10592,10615,10769,11004,11065,11113,11130,11339,2…	BIRC2,BIRC3,BIRC5,RHOA,BUB1,BUB1B,CAV2,CCNA2,CCNB1,CCNF,CDK1,CDC6,CDC20,CDC25A,CDC25C,CDK2,CENPA,CENPE,CENPF,RCC1,DYNC1H1,EDN1,EGF,GEM,HELLS,INCENP,KIF11,KIF22,KPNB1,STMN1,MAD2L1,MKI67,MYBL2,NEDD9,NEK2,NUP88,PCNT,PLK1,RAD21,RAN,RANBP1,RBBP8,STIL,AURKA,TTK,VRK1,XRCC3,YEATS4,HMGA2,SMC1A,TIMELESS,PRC1,PKMYT1,SMC3,CCNB2,ARHGEF2,BUB3,AURKB,PTTG1,KIF23,KIF20B,ESPL1,KNTC1,DLGAP5,CKAP5,NCAPD2,KIF14,SMC4,…
2_Member	GO Biological Processes	GO:0048285	organelle fission	-73.5803	-70.284	180/649	329,330,332,387,675,699,701,858,890,891,899,983,990,991,993,995,1017,1058,1062,1063,1104,1723,1759,1778,1906,1950,2067,2175,2177,2669,2956,3070,3619,3832,3835,3837,3925,3955,4085,4288,4361,4605,4739,4751,4927,5116,5347,5885,5888,5901,5902,5932,6491,6790,7153,7272,7443,7516,7517,8089,8091,8243,8438,8914,9055,9088,9126,9133,9134,9181,9184,9212,9232,9319,9493,9585,9700,9735,9787,9793,9918,9928,10051…	BIRC2,BIRC3,BIRC5,RHOA,BRCA2,BUB1,BUB1B,CAV2,CCNA2,CCNB1,CCNF,CDK1,CDC6,CDC20,CDC25A,CDC25C,CDK2,CENPA,CENPE,CENPF,RCC1,DHODH,DNM1,DYNC1H1,EDN1,EGF,ERCC1,FANCA,FANCD2,GEM,MSH6,HELLS,INCENP,KIF11,KIF22,KPNB1,STMN1,LFNG,MAD2L1,MKI67,MRE11,MYBL2,NEDD9,NEK2,NUP88,PCNT,PLK1,RAD21,RAD51,RAN,RANBP1,RBBP8,STIL,AURKA,TOP2A,TTK,VRK1,XRCC2,XRCC3,YEATS4,HMGA2,SMC1A,RAD54L,TIMELESS,PRC1,PKMYT1,SMC3,CCNB2,CCNE…
2_Member	GO Biological Processes	GO:0007059	chromosome segregation	-64.4216	-61.171	122/334	292,332,672,699,701,891,990,991,1058,1062,1063,1104,1663,1894,2177,2237,2491,2669,3619,3832,3835,3837,4085,4288,4361,4751,5347,5501,5885,7153,7272,7517,8243,9055,9126,9134,9184,9212,9232,9319,9493,9700,9735,9787,9793,9918,9928,10051,10096,10097,10403,10460,10592,10615,11004,11065,11130,11339,23212,23310,23397,23421,24137,25906,28989,29127,51203,54069,54821,54908,54984,55055,55143,55165,55166,5535…	SLC25A5,BIRC5,BRCA1,BUB1,BUB1B,CCNB1,CDC6,CDC20,CENPA,CENPE,CENPF,RCC1,DDX11,ECT2,FANCD2,FEN1,CENPI,GEM,INCENP,KIF11,KIF22,KPNB1,MAD2L1,MKI67,MRE11,NEK2,PLK1,PPP1CC,RAD21,TOP2A,TTK,XRCC3,SMC1A,PRC1,SMC3,CCNE2,BUB3,AURKB,PTTG1,TRIP13,KIF23,ESPL1,KNTC1,DLGAP5,CKAP5,NCAPD2,KIF14,SMC4,ACTR3,ACTR2,NDC80,TACC3,SMC2,SPAG5,KIF2C,UBE2C,ZWINT,OIP5,RRS1,NCAPD3,NCAPH,ITGB3BP,KIF4A,ANAPC15,NTMT1,RACGAP1,NUSAP…
2_Member	GO Biological Processes	GO:0051301	cell division	-59.6893	-56.518	151/559	332,387,595,641,675,699,701,805,890,891,899,983,990,991,993,995,1017,1021,1058,1062,1063,1104,1163,1894,2119,2246,2247,2250,3070,3619,3815,3832,3925,3978,4085,4627,4739,4751,4824,4904,5347,5501,5885,5898,5901,5921,5932,6790,7153,7424,7443,8091,8243,8317,8324,8502,8914,9055,9126,9133,9134,9181,9184,9212,9232,9493,9585,9700,9735,9793,9918,9928,10051,10096,10097,10112,10376,10403,10460,10592,10615,1…	BIRC5,RHOA,CCND1,BLM,BRCA2,BUB1,BUB1B,CALM2,CCNA2,CCNB1,CCNF,CDK1,CDC6,CDC20,CDC25A,CDC25C,CDK2,CDK6,CENPA,CENPE,CENPF,RCC1,CKS1B,ECT2,ETV5,FGF1,FGF2,FGF5,HELLS,INCENP,KIT,KIF11,STMN1,LIG1,MAD2L1,MYH9,NEDD9,NEK2,NKX3-1,YBX1,PLK1,PPP1CC,RAD21,RALA,RAN,RASA1,RBBP8,AURKA,TOP2A,VEGFC,VRK1,HMGA2,SMC1A,CDC7,FZD7,PKP4,TIMELESS,PRC1,SMC3,CCNB2,CCNE2,ARHGEF2,BUB3,AURKB,PTTG1,KIF23,KIF20B,ESPL1,KNTC1,CKAP5…
2_Member	GO Biological Processes	GO:0098813	nuclear chromosome segregation	-57.9458	-54.809	108/290	332,699,701,891,990,991,1058,1062,1063,1663,1894,2177,2237,2491,2669,3619,3835,3837,4085,4361,4751,5347,5501,5885,7153,7272,7517,8243,9055,9126,9134,9184,9212,9232,9319,9493,9700,9735,9787,9793,9918,9928,10051,10096,10097,10403,10460,10592,10615,11004,11065,11130,23212,23310,23397,23421,24137,25906,29127,51203,54821,54908,54984,55055,55143,55165,55166,55706,55839,56776,57082,57122,57405,57697,641…	BIRC5,BUB1,BUB1B,CCNB1,CDC6,CDC20,CENPA,CENPE,CENPF,DDX11,ECT2,FANCD2,FEN1,CENPI,GEM,INCENP,KIF22,KPNB1,MAD2L1,MRE11,NEK2,PLK1,PPP1CC,RAD21,TOP2A,TTK,XRCC3,SMC1A,PRC1,SMC3,CCNE2,BUB3,AURKB,PTTG1,TRIP13,KIF23,ESPL1,KNTC1,DLGAP5,CKAP5,NCAPD2,KIF14,SMC4,ACTR3,ACTR2,NDC80,TACC3,SMC2,SPAG5,KIF2C,UBE2C,ZWINT,RRS1,NCAPD3,NCAPH,ITGB3BP,KIF4A,ANAPC15,RACGAP1,NUSAP1,ERCC6L,SPDL1,PINX1,ZWILCH,CDCA8,CEP55,CE…
2_Member	GO Biological Processes	GO:0000819	sister chromatid segregation	-56.7581	-53.653	94/220	332,699,701,891,990,991,1058,1062,1063,1663,2237,2491,3619,3835,3837,4085,4361,4751,5347,5501,5885,7153,7272,7517,8243,9055,9126,9184,9212,9493,9700,9735,9787,9793,9918,9928,10051,10403,10460,10592,10615,11004,11065,11130,23212,23310,23397,23421,24137,25906,29127,51203,54821,54908,54984,55055,55143,55165,55166,55839,57082,57122,57405,64105,64151,64946,79003,79019,79075,79172,79682,79892,79902,799…	BIRC5,BUB1,BUB1B,CCNB1,CDC6,CDC20,CENPA,CENPE,CENPF,DDX11,FEN1,CENPI,INCENP,KIF22,KPNB1,MAD2L1,MRE11,NEK2,PLK1,PPP1CC,RAD21,TOP2A,TTK,XRCC3,SMC1A,PRC1,SMC3,BUB3,AURKB,KIF23,ESPL1,KNTC1,DLGAP5,CKAP5,NCAPD2,KIF14,SMC4,NDC80,TACC3,SMC2,SPAG5,KIF2C,UBE2C,ZWINT,RRS1,NCAPD3,NCAPH,ITGB3BP,KIF4A,ANAPC15,RACGAP1,NUSAP1,ERCC6L,SPDL1,PINX1,ZWILCH,CDCA8,CEP55,CENPQ,CENPN,KNL1,NUP107,SPC25,CENPK,NCAPG,CENPH,M…
2_Member	Reactome Gene Sets	R-HSA-68877	Mitotic Prometaphase	-45.237	-42.241	65/128	332,699,701,891,983,991,1058,1062,1063,2491,3619,4085,5347,5501,5885,8243,9126,9133,9184,9212,9735,9793,9918,10051,10376,10381,10383,10403,10592,11004,11130,23397,23421,54821,54908,55055,55143,55166,55839,57082,57122,57405,64105,64151,64946,79003,79019,79172,79682,79902,79980,80152,81929,81930,83540,84617,84790,91687,113130,147841,151246,151648,220134,348235,401541	BIRC5,BUB1,BUB1B,CCNB1,CDK1,CDC20,CENPA,CENPE,CENPF,CENPI,INCENP,MAD2L1,PLK1,PPP1CC,RAD21,SMC1A,SMC3,CCNB2,BUB3,AURKB,KNTC1,CKAP5,NCAPD2,SMC4,TUBA1B,TUBB3,TUBB4B,NDC80,SMC2,KIF2C,ZWINT,NCAPH,ITGB3BP,ERCC6L,SPDL1,ZWILCH,CDCA8,CENPQ,CENPN,KNL1,NUP107,SPC25,CENPK,NCAPG,CENPH,MIS12,CENPM,CENPO,CENPU,NUP85,DSN1,CENPT,SEH1L,KIF18A,NUF2,TUBB6,TUBA1C,CENPL,CDCA5,SPC24,SGO2,SGO1,SKA1,SKA2,CENPP
2_Member	Reactome Gene Sets	R-HSA-68886	M Phase	-43.7161	-40.744	99/327	332,699,701,891,983,991,1058,1062,1063,2491,3014,3015,3619,4000,4001,4085,4927,5347,5501,5700,5702,5705,5708,5717,5885,6418,7112,7443,8243,9126,9133,9184,9212,9232,9493,9631,9688,9700,9735,9793,9918,10051,10112,10376,10381,10383,10403,10592,11004,11065,11130,23165,23198,23310,23397,23421,23511,23636,25906,26271,29781,54821,54892,54908,55055,55143,55166,55706,55839,57082,57122,57405,64105,64151,64…	BIRC5,BUB1,BUB1B,CCNB1,CDK1,CDC20,CENPA,CENPE,CENPF,CENPI,H2AFX,H2AFZ,INCENP,LMNA,LMNB1,MAD2L1,NUP88,PLK1,PPP1CC,PSMC1,PSMC3,PSMC5,PSMD2,PSMD11,RAD21,SET,TMPO,VRK1,SMC1A,SMC3,CCNB2,BUB3,AURKB,PTTG1,KIF23,NUP155,NUP93,ESPL1,KNTC1,CKAP5,NCAPD2,SMC4,KIF20A,TUBA1B,TUBB3,TUBB4B,NDC80,SMC2,KIF2C,UBE2C,ZWINT,NUP205,PSME4,NCAPD3,NCAPH,ITGB3BP,NUP188,NUP62,ANAPC15,FBXO5,NCAPH2,ERCC6L,NCAPG2,SPDL1,ZWILCH,C…
2_Member	Reactome Gene Sets	R-HSA-2500257	Resolution of Sister Chromatid Cohesion	-41.2703	-38.362	60/120	332,699,701,891,983,991,1058,1062,1063,2491,3619,4085,5347,5501,5885,8243,9126,9133,9184,9212,9735,9793,10376,10381,10383,10403,11004,11130,23421,54821,54908,55055,55143,55166,55839,57082,57122,57405,64105,64946,79003,79019,79172,79682,79902,79980,80152,81929,81930,83540,84617,84790,91687,113130,147841,151246,151648,220134,348235,401541	BIRC5,BUB1,BUB1B,CCNB1,CDK1,CDC20,CENPA,CENPE,CENPF,CENPI,INCENP,MAD2L1,PLK1,PPP1CC,RAD21,SMC1A,SMC3,CCNB2,BUB3,AURKB,KNTC1,CKAP5,TUBA1B,TUBB3,TUBB4B,NDC80,KIF2C,ZWINT,ITGB3BP,ERCC6L,SPDL1,ZWILCH,CDCA8,CENPQ,CENPN,KNL1,NUP107,SPC25,CENPK,CENPH,MIS12,CENPM,CENPO,CENPU,NUP85,DSN1,CENPT,SEH1L,KIF18A,NUF2,TUBB6,TUBA1C,CENPL,CDCA5,SPC24,SGO2,SGO1,SKA1,SKA2,CENPP
2_Member	GO Biological Processes	GO:0007062	sister chromatid cohesion	-40.8795	-38.027	61/126	332,699,701,991,1058,1062,1063,1663,2237,2491,3619,3835,4085,4361,5347,5501,5885,8243,9126,9184,9212,9700,9735,9793,10403,11004,11130,23421,54821,54908,55055,55143,55166,55839,57082,57122,57405,64105,64946,79003,79019,79075,79172,79682,79892,79902,79980,80152,81929,81930,83540,83903,84250,91687,113130,147841,151246,151648,220134,348235,401541	BIRC5,BUB1,BUB1B,CDC20,CENPA,CENPE,CENPF,DDX11,FEN1,CENPI,INCENP,KIF22,MAD2L1,MRE11,PLK1,PPP1CC,RAD21,SMC1A,SMC3,BUB3,AURKB,ESPL1,KNTC1,CKAP5,NDC80,KIF2C,ZWINT,ITGB3BP,ERCC6L,SPDL1,ZWILCH,CDCA8,CENPQ,CENPN,KNL1,NUP107,SPC25,CENPK,CENPH,MIS12,CENPM,DSCC1,CENPO,CENPU,MCMBP,NUP85,DSN1,CENPT,SEH1L,KIF18A,NUF2,GSG2,SLF1,CENPL,CDCA5,SPC24,SGO2,SGO1,SKA1,SKA2,CENPP
2_Member	Reactome Gene Sets	R-HSA-5663220	RHO GTPases Activate Formins	-40.2901	-37.454	62/133	60,71,332,387,699,701,991,1058,1062,1063,1729,1855,2491,3619,3688,4085,5216,5347,5501,9184,9212,9735,9793,10376,10381,10383,10403,11004,11130,23421,54821,54908,55055,55143,55166,55839,57082,57122,57405,64105,64946,79003,79019,79172,79682,79902,79980,80152,81624,81929,81930,83540,84617,84790,91010,91687,147841,151246,151648,220134,348235,401541	ACTB,ACTG1,BIRC5,RHOA,BUB1,BUB1B,CDC20,CENPA,CENPE,CENPF,DIAPH1,DVL1,CENPI,INCENP,ITGB1,MAD2L1,PFN1,PLK1,PPP1CC,BUB3,AURKB,KNTC1,CKAP5,TUBA1B,TUBB3,TUBB4B,NDC80,KIF2C,ZWINT,ITGB3BP,ERCC6L,SPDL1,ZWILCH,CDCA8,CENPQ,CENPN,KNL1,NUP107,SPC25,CENPK,CENPH,MIS12,CENPM,CENPO,CENPU,NUP85,DSN1,CENPT,DIAPH3,SEH1L,KIF18A,NUF2,TUBB6,TUBA1C,FMNL3,CENPL,SPC24,SGO2,SGO1,SKA1,SKA2,CENPP
2_Member	Reactome Gene Sets	R-HSA-2555396	Mitotic Metaphase and Anaphase	-37.6391	-34.82	72/199	332,699,701,991,1058,1062,1063,2491,3619,4000,4001,4085,5347,5501,5700,5702,5705,5708,5717,5885,7112,7443,8243,9126,9184,9212,9232,9700,9735,9793,10376,10381,10383,10403,11004,11065,11130,23198,23421,25906,26271,54821,54908,55055,55143,55166,55839,57082,57122,57405,64105,64946,79003,79019,79172,79682,79902,79980,80152,81929,81930,83540,84617,84790,91687,113130,147841,151246,151648,220134,348235,4…	BIRC5,BUB1,BUB1B,CDC20,CENPA,CENPE,CENPF,CENPI,INCENP,LMNA,LMNB1,MAD2L1,PLK1,PPP1CC,PSMC1,PSMC3,PSMC5,PSMD2,PSMD11,RAD21,TMPO,VRK1,SMC1A,SMC3,BUB3,AURKB,PTTG1,ESPL1,KNTC1,CKAP5,TUBA1B,TUBB3,TUBB4B,NDC80,KIF2C,UBE2C,ZWINT,PSME4,ITGB3BP,ANAPC15,FBXO5,ERCC6L,SPDL1,ZWILCH,CDCA8,CENPQ,CENPN,KNL1,NUP107,SPC25,CENPK,CENPH,MIS12,CENPM,CENPO,CENPU,NUP85,DSN1,CENPT,SEH1L,KIF18A,NUF2,TUBB6,TUBA1C,CENPL,CDCA…
2_Member	Reactome Gene Sets	R-HSA-68882	Mitotic Anaphase	-36.8224	-34.034	71/198	332,699,701,991,1058,1062,1063,2491,3619,4000,4001,4085,5347,5501,5700,5702,5705,5708,5717,5885,7112,7443,8243,9126,9184,9212,9232,9700,9735,9793,10376,10381,10383,10403,11004,11065,11130,23198,23421,25906,54821,54908,55055,55143,55166,55839,57082,57122,57405,64105,64946,79003,79019,79172,79682,79902,79980,80152,81929,81930,83540,84617,84790,91687,113130,147841,151246,151648,220134,348235,401541	BIRC5,BUB1,BUB1B,CDC20,CENPA,CENPE,CENPF,CENPI,INCENP,LMNA,LMNB1,MAD2L1,PLK1,PPP1CC,PSMC1,PSMC3,PSMC5,PSMD2,PSMD11,RAD21,TMPO,VRK1,SMC1A,SMC3,BUB3,AURKB,PTTG1,ESPL1,KNTC1,CKAP5,TUBA1B,TUBB3,TUBB4B,NDC80,KIF2C,UBE2C,ZWINT,PSME4,ITGB3BP,ANAPC15,ERCC6L,SPDL1,ZWILCH,CDCA8,CENPQ,CENPN,KNL1,NUP107,SPC25,CENPK,CENPH,MIS12,CENPM,CENPO,CENPU,NUP85,DSN1,CENPT,SEH1L,KIF18A,NUF2,TUBB6,TUBA1C,CENPL,CDCA5,SPC2…
2_Member	Reactome Gene Sets	R-HSA-2467813	Separation of Sister Chromatids	-34.7415	-31.982	67/187	332,699,701,991,1058,1062,1063,2491,3619,4085,5347,5501,5700,5702,5705,5708,5717,5885,8243,9126,9184,9212,9232,9700,9735,9793,10376,10381,10383,10403,11004,11065,11130,23198,23421,25906,54821,54908,55055,55143,55166,55839,57082,57122,57405,64105,64946,79003,79019,79172,79682,79902,79980,80152,81929,81930,83540,84617,84790,91687,113130,147841,151246,151648,220134,348235,401541	BIRC5,BUB1,BUB1B,CDC20,CENPA,CENPE,CENPF,CENPI,INCENP,MAD2L1,PLK1,PPP1CC,PSMC1,PSMC3,PSMC5,PSMD2,PSMD11,RAD21,SMC1A,SMC3,BUB3,AURKB,PTTG1,ESPL1,KNTC1,CKAP5,TUBA1B,TUBB3,TUBB4B,NDC80,KIF2C,UBE2C,ZWINT,PSME4,ITGB3BP,ANAPC15,ERCC6L,SPDL1,ZWILCH,CDCA8,CENPQ,CENPN,KNL1,NUP107,SPC25,CENPK,CENPH,MIS12,CENPM,CENPO,CENPU,NUP85,DSN1,CENPT,SEH1L,KIF18A,NUF2,TUBB6,TUBA1C,CENPL,CDCA5,SPC24,SGO2,SGO1,SKA1,SKA2…
2_Member	GO Biological Processes	GO:0000070	mitotic sister chromatid segregation	-33.0738	-30.328	56/135	699,701,891,990,991,1062,1063,3835,3837,4085,4751,5347,7272,7517,8243,9055,9126,9184,9212,9493,9700,9787,9918,9928,10051,10403,10460,10592,10615,11004,11065,11130,23212,23310,23397,24137,25906,29127,51203,54908,54984,55143,55165,64151,79003,79075,81620,81929,81930,83903,84250,84722,90417,113130,146909,348654	BUB1,BUB1B,CCNB1,CDC6,CDC20,CENPE,CENPF,KIF22,KPNB1,MAD2L1,NEK2,PLK1,TTK,XRCC3,SMC1A,PRC1,SMC3,BUB3,AURKB,KIF23,ESPL1,DLGAP5,NCAPD2,KIF14,SMC4,NDC80,TACC3,SMC2,SPAG5,KIF2C,UBE2C,ZWINT,RRS1,NCAPD3,NCAPH,KIF4A,ANAPC15,RACGAP1,NUSAP1,SPDL1,PINX1,CDCA8,CEP55,NCAPG,MIS12,DSCC1,CDT1,SEH1L,KIF18A,GSG2,SLF1,PSRC1,KNSTRN,CDCA5,KIF18B,GEN1
2_Member	Reactome Gene Sets	R-HSA-195258	RHO GTPase Effectors	-31.4122	-28.718	82/311	60,71,332,387,699,701,805,991,995,1058,1062,1063,1729,1855,2491,3014,3015,3619,3688,3799,4085,4627,4771,5058,5216,5347,5501,5880,7533,7534,9055,9184,9212,9735,9793,9928,10096,10097,10376,10381,10383,10403,10971,11004,11113,11130,23421,29941,54821,54908,55055,55143,55166,55839,57082,57122,57405,64105,64946,79003,79019,79172,79682,79902,79980,80152,81624,81929,81930,83540,84617,84790,91010,91687,94…	ACTB,ACTG1,BIRC5,RHOA,BUB1,BUB1B,CALM2,CDC20,CDC25C,CENPA,CENPE,CENPF,DIAPH1,DVL1,CENPI,H2AFX,H2AFZ,INCENP,ITGB1,KIF5B,MAD2L1,MYH9,NF2,PAK1,PFN1,PLK1,PPP1CC,RAC2,YWHAH,YWHAZ,PRC1,BUB3,AURKB,KNTC1,CKAP5,KIF14,ACTR3,ACTR2,TUBA1B,TUBB3,TUBB4B,NDC80,YWHAQ,KIF2C,CIT,ZWINT,ITGB3BP,PKN3,ERCC6L,SPDL1,ZWILCH,CDCA8,CENPQ,CENPN,KNL1,NUP107,SPC25,CENPK,CENPH,MIS12,CENPM,CENPO,CENPU,NUP85,DSN1,CENPT,DIAPH3,SE…
2_Member	Reactome Gene Sets	R-HSA-194315	Signaling by Rho GTPases	-30.4451	-27.774	98/446	60,71,332,387,396,397,699,701,805,991,995,1058,1062,1063,1123,1729,1855,1894,2491,3014,3015,3619,3688,3799,4085,4627,4771,5058,5216,5347,5501,5880,7533,7534,9055,9181,9184,9212,9735,9793,9824,9928,10096,10097,10276,10376,10381,10383,10395,10403,10971,11004,11113,11130,23421,25791,29127,29941,50650,54821,54908,55055,55143,55166,55789,55839,57082,57122,57405,57514,58504,64105,64946,79003,79019,7917…	ACTB,ACTG1,BIRC5,RHOA,ARHGDIA,ARHGDIB,BUB1,BUB1B,CALM2,CDC20,CDC25C,CENPA,CENPE,CENPF,CHN1,DIAPH1,DVL1,ECT2,CENPI,H2AFX,H2AFZ,INCENP,ITGB1,KIF5B,MAD2L1,MYH9,NF2,PAK1,PFN1,PLK1,PPP1CC,RAC2,YWHAH,YWHAZ,PRC1,ARHGEF2,BUB3,AURKB,KNTC1,CKAP5,ARHGAP11A,KIF14,ACTR3,ACTR2,NET1,TUBA1B,TUBB3,TUBB4B,DLC1,NDC80,YWHAQ,KIF2C,CIT,ZWINT,ITGB3BP,NGEF,RACGAP1,PKN3,ARHGEF3,ERCC6L,SPDL1,ZWILCH,CDCA8,CENPQ,DEPDC1B,CEN…
3_Summary	GO Biological Processes	GO:0006259	DNA metabolic process	-63.3063	-60.097	208/977	86,306,328,580,641,672,675,983,990,993,995,1017,1032,1063,1663,1736,1763,1786,1950,2067,2146,2175,2177,2187,2189,2237,2305,2852,2956,3005,3014,3070,3146,3148,3149,3150,3159,3178,3184,3265,3320,3329,3575,3835,3837,3978,4171,4172,4173,4174,4175,4176,4288,4331,4361,4436,4521,4678,4751,4771,4796,4830,4841,4869,4998,5111,5216,5422,5424,5426,5427,5557,5558,5591,5763,5885,5888,5901,5932,5983,5984,5985,6…	ACTL6A,ANXA3,APEX1,BARD1,BLM,BRCA1,BRCA2,CDK1,CDC6,CDC25A,CDC25C,CDK2,CDKN2D,CENPF,DDX11,DKC1,DNA2,DNMT1,EGF,ERCC1,EZH2,FANCA,FANCD2,FANCB,FANCG,FEN1,FOXM1,GPER1,MSH6,H1F0,H2AFX,HELLS,HMGB1,HMGB2,HMGB3,HMGN1,HMGA1,HNRNPA1,HNRNPD,HRAS,HSP90AA1,HSPD1,IL7R,KIF22,KPNB1,LIG1,MCM2,MCM3,MCM4,MCM5,MCM6,MCM7,MKI67,MNAT1,MRE11,MSH2,NUDT1,NASP,NEK2,NF2,TONSL,NME1,NONO,NPM1,ORC1,PCNA,PFN1,POLA1,POLD1,POLE,PO…
3_Member	GO Biological Processes	GO:0006259	DNA metabolic process	-63.3063	-60.097	208/977	86,306,328,580,641,672,675,983,990,993,995,1017,1032,1063,1663,1736,1763,1786,1950,2067,2146,2175,2177,2187,2189,2237,2305,2852,2956,3005,3014,3070,3146,3148,3149,3150,3159,3178,3184,3265,3320,3329,3575,3835,3837,3978,4171,4172,4173,4174,4175,4176,4288,4331,4361,4436,4521,4678,4751,4771,4796,4830,4841,4869,4998,5111,5216,5422,5424,5426,5427,5557,5558,5591,5763,5885,5888,5901,5932,5983,5984,5985,6…	ACTL6A,ANXA3,APEX1,BARD1,BLM,BRCA1,BRCA2,CDK1,CDC6,CDC25A,CDC25C,CDK2,CDKN2D,CENPF,DDX11,DKC1,DNA2,DNMT1,EGF,ERCC1,EZH2,FANCA,FANCD2,FANCB,FANCG,FEN1,FOXM1,GPER1,MSH6,H1F0,H2AFX,HELLS,HMGB1,HMGB2,HMGB3,HMGN1,HMGA1,HNRNPA1,HNRNPD,HRAS,HSP90AA1,HSPD1,IL7R,KIF22,KPNB1,LIG1,MCM2,MCM3,MCM4,MCM5,MCM6,MCM7,MKI67,MNAT1,MRE11,MSH2,NUDT1,NASP,NEK2,NF2,TONSL,NME1,NONO,NPM1,ORC1,PCNA,PFN1,POLA1,POLD1,POLE,PO…
3_Member	GO Biological Processes	GO:0006974	cellular response to DNA damage stimulus	-41.8217	-38.872	155/791	86,328,580,595,596,641,672,675,891,983,995,1017,1032,1663,1763,1869,1969,2067,2175,2177,2187,2189,2237,2305,2956,3014,3146,3148,3150,3159,3835,3978,4176,4331,4361,4436,4521,4796,4824,4841,4869,5111,5347,5366,5422,5424,5426,5427,5591,5885,5888,5932,5983,5984,5985,6117,6119,6749,6790,6839,6996,7023,7027,7153,7374,7398,7468,7516,7517,7913,8091,8208,8243,8317,8318,8438,8445,8533,8682,8914,9100,9126,9…	ACTL6A,APEX1,BARD1,CCND1,BCL2,BLM,BRCA1,BRCA2,CCNB1,CDK1,CDC25C,CDK2,CDKN2D,DDX11,DNA2,E2F1,EPHA2,ERCC1,FANCA,FANCD2,FANCB,FANCG,FEN1,FOXM1,MSH6,H2AFX,HMGB1,HMGB2,HMGN1,HMGA1,KIF22,LIG1,MCM7,MNAT1,MRE11,MSH2,NUDT1,TONSL,NKX3-1,NONO,NPM1,PCNA,PLK1,PMAIP1,POLA1,POLD1,POLE,POLE2,PRKDC,RAD21,RAD51,RBBP8,RFC3,RFC4,RFC5,RPA1,RPA3,SSRP1,AURKA,SUV39H1,TDG,TFAP4,TFDP1,TOP2A,UNG,USP1,NSD2,XRCC2,XRCC3,DEK,H…
3_Member	GO Biological Processes	GO:0006281	DNA repair	-37.1787	-34.375	117/523	86,328,580,641,672,675,983,1017,1032,1663,1763,2067,2175,2177,2187,2189,2237,2305,2956,3014,3146,3148,3150,3159,3835,3978,4331,4361,4436,4521,4796,4841,4869,5111,5422,5424,5426,5427,5591,5885,5888,5932,5983,5984,5985,6117,6119,6749,6996,7374,7398,7468,7516,7517,7913,8091,8208,8243,8317,8318,8438,8533,8914,9100,9126,9156,9232,9319,9401,9557,9768,10036,10038,10535,10635,10714,10721,10856,11073,1119…	ACTL6A,APEX1,BARD1,BLM,BRCA1,BRCA2,CDK1,CDK2,CDKN2D,DDX11,DNA2,ERCC1,FANCA,FANCD2,FANCB,FANCG,FEN1,FOXM1,MSH6,H2AFX,HMGB1,HMGB2,HMGN1,HMGA1,KIF22,LIG1,MNAT1,MRE11,MSH2,NUDT1,TONSL,NONO,NPM1,PCNA,POLA1,POLD1,POLE,POLE2,PRKDC,RAD21,RAD51,RBBP8,RFC3,RFC4,RFC5,RPA1,RPA3,SSRP1,TDG,UNG,USP1,NSD2,XRCC2,XRCC3,DEK,HMGA2,CHAF1B,SMC1A,CDC7,CDC45,RAD54L,COPS3,TIMELESS,USP10,SMC3,EXO1,PTTG1,TRIP13,RECQL4,CHD1…
3_Member	GO Biological Processes	GO:0006310	DNA recombination	-31.9181	-29.199	77/271	86,328,580,641,672,675,1763,2067,2237,2956,3014,3146,3148,3149,3329,3575,3978,4361,4436,4796,4841,5111,5422,5424,5426,5427,5557,5558,5591,5885,5888,5932,5983,5984,5985,6117,6119,6932,7153,7292,7374,7468,7516,7517,8317,8318,8438,9156,9319,9401,10189,10635,10714,10721,10856,23649,25788,29893,51377,51659,55010,57697,63979,64710,79915,80010,83990,84057,84083,84296,84515,116028,118460,146956,220064,25…	ACTL6A,APEX1,BARD1,BLM,BRCA1,BRCA2,DNA2,ERCC1,FEN1,MSH6,H2AFX,HMGB1,HMGB2,HMGB3,HSPD1,IL7R,LIG1,MRE11,MSH2,TONSL,NONO,PCNA,POLA1,POLD1,POLE,POLE2,PRIM1,PRIM2,PRKDC,RAD21,RAD51,RBBP8,RFC3,RFC4,RFC5,RPA1,RPA3,TCF7,TOP2A,TNFSF4,UNG,NSD2,XRCC2,XRCC3,CDC7,CDC45,RAD54L,EXO1,TRIP13,RECQL4,ALYREF,RAD51AP1,POLD3,POLQ,RUVBL2,POLA2,RAD54B,PSMC3IP,UCHL5,GINS2,PARPBP,FANCM,FIGNL1,NUCKS1,ATAD5,RMI1,BRIP1,MND1,…
3_Member	Reactome Gene Sets	R-HSA-73894	DNA Repair	-20.4443	-18.032	68/319	60,86,328,580,641,672,675,890,1017,1763,2067,2175,2177,2187,2189,2237,2956,3014,3150,3978,4331,4361,4436,5111,5424,5426,5427,5591,5888,5932,5983,5984,5985,6117,6119,6996,7374,7398,7468,7516,7517,8533,8914,9100,9156,9557,9768,10038,10635,10714,10721,11073,29089,51514,54962,55183,55215,55775,56852,57697,63967,64858,80010,83990,84126,116028,146956,348654	ACTB,ACTL6A,APEX1,BARD1,BLM,BRCA1,BRCA2,CCNA2,CDK2,DNA2,ERCC1,FANCA,FANCD2,FANCB,FANCG,FEN1,MSH6,H2AFX,HMGN1,LIG1,MNAT1,MRE11,MSH2,PCNA,POLD1,POLE,POLE2,PRKDC,RAD51,RBBP8,RFC3,RFC4,RFC5,RPA1,RPA3,TDG,UNG,USP1,NSD2,XRCC2,XRCC3,COPS3,TIMELESS,USP10,EXO1,CHD1L,PCLAF,PARP2,RAD51AP1,POLD3,POLQ,TOPBP1,UBE2T,DTL,TIPIN,RIF1,FANCI,TDP1,RAD18,FANCM,CLSPN,DCLRE1B,RMI1,BRIP1,ATRIP,RMI2,EME1,GEN1
3_Member	GO Biological Processes	GO:0006302	double-strand break repair	-18.7709	-16.401	52/210	580,641,672,675,1663,1763,2067,2237,2305,3014,4361,4436,4796,5422,5591,5885,5888,5932,6117,6119,7468,7516,7517,7913,8091,8317,8318,8438,8914,9319,9401,10635,10721,25788,51659,55010,55183,55775,63979,64710,64858,83990,84057,84250,84296,84515,113130,146956,157570,220064,253714,348654	BARD1,BLM,BRCA1,BRCA2,DDX11,DNA2,ERCC1,FEN1,FOXM1,H2AFX,MRE11,MSH2,TONSL,POLA1,PRKDC,RAD21,RAD51,RBBP8,RPA1,RPA3,NSD2,XRCC2,XRCC3,DEK,HMGA2,CDC7,CDC45,RAD54L,TIMELESS,TRIP13,RECQL4,RAD51AP1,POLQ,RAD54B,GINS2,PARPBP,RIF1,TDP1,FIGNL1,NUCKS1,DCLRE1B,BRIP1,MND1,SLF1,GINS4,MCM8,CDCA5,EME1,ESCO2,ORAOV1,MMS22L,GEN1
3_Member	GO Biological Processes	GO:0000724	double-strand break repair via homologous recombination	-12.5278	-10.42	29/101	641,672,675,2237,3014,4361,4796,5888,5932,6117,6119,7516,7517,8317,8318,8438,9401,10635,10721,25788,51659,55010,63979,64710,84296,84515,220064,253714,348654	BLM,BRCA1,BRCA2,FEN1,H2AFX,MRE11,TONSL,RAD51,RBBP8,RPA1,RPA3,XRCC2,XRCC3,CDC7,CDC45,RAD54L,RECQL4,RAD51AP1,POLQ,RAD54B,GINS2,PARPBP,FIGNL1,NUCKS1,GINS4,MCM8,ORAOV1,MMS22L,GEN1
3_Member	GO Biological Processes	GO:0000725	recombinational repair	-12.4069	-10.314	29/102	641,672,675,2237,3014,4361,4796,5888,5932,6117,6119,7516,7517,8317,8318,8438,9401,10635,10721,25788,51659,55010,63979,64710,84296,84515,220064,253714,348654	BLM,BRCA1,BRCA2,FEN1,H2AFX,MRE11,TONSL,RAD51,RBBP8,RPA1,RPA3,XRCC2,XRCC3,CDC7,CDC45,RAD54L,RECQL4,RAD51AP1,POLQ,RAD54B,GINS2,PARPBP,FIGNL1,NUCKS1,GINS4,MCM8,ORAOV1,MMS22L,GEN1
4_Summary	GO Biological Processes	GO:0006260	DNA replication	-54.4089	-51.334	105/293	580,641,672,675,983,990,993,995,1017,1663,1763,1950,2237,3159,3265,3978,4171,4172,4173,4174,4175,4176,4361,4678,4771,4796,4998,5111,5422,5424,5426,5427,5557,5558,5763,5888,5932,5983,5984,5985,6117,6119,6240,6241,6418,6749,7884,8208,8243,8317,8318,8914,9126,9134,9156,9401,9768,9837,10036,10038,10189,10535,10714,10721,10926,11073,11177,11198,23560,23594,23649,27000,27101,29980,51053,51514,51659,549…	BARD1,BLM,BRCA1,BRCA2,CDK1,CDC6,CDC25A,CDC25C,CDK2,DDX11,DNA2,EGF,FEN1,HMGA1,HRAS,LIG1,MCM2,MCM3,MCM4,MCM5,MCM6,MCM7,MRE11,NASP,NF2,TONSL,ORC1,PCNA,POLA1,POLD1,POLE,POLE2,PRIM1,PRIM2,PTMS,RAD51,RBBP8,RFC3,RFC4,RFC5,RPA1,RPA3,RRM1,RRM2,SET,SSRP1,SLBP,CHAF1B,SMC1A,CDC7,CDC45,TIMELESS,SMC3,CCNE2,EXO1,RECQL4,PCLAF,GINS1,CHAF1A,PARP2,ALYREF,RNASEH2A,POLD3,POLQ,DBF4,TOPBP1,BAZ1A,SUPT16H,GTPBP4,ORC6,POL…
4_Member	GO Biological Processes	GO:0006260	DNA replication	-54.4089	-51.334	105/293	580,641,672,675,983,990,993,995,1017,1663,1763,1950,2237,3159,3265,3978,4171,4172,4173,4174,4175,4176,4361,4678,4771,4796,4998,5111,5422,5424,5426,5427,5557,5558,5763,5888,5932,5983,5984,5985,6117,6119,6240,6241,6418,6749,7884,8208,8243,8317,8318,8914,9126,9134,9156,9401,9768,9837,10036,10038,10189,10535,10714,10721,10926,11073,11177,11198,23560,23594,23649,27000,27101,29980,51053,51514,51659,549…	BARD1,BLM,BRCA1,BRCA2,CDK1,CDC6,CDC25A,CDC25C,CDK2,DDX11,DNA2,EGF,FEN1,HMGA1,HRAS,LIG1,MCM2,MCM3,MCM4,MCM5,MCM6,MCM7,MRE11,NASP,NF2,TONSL,ORC1,PCNA,POLA1,POLD1,POLE,POLE2,PRIM1,PRIM2,PTMS,RAD51,RBBP8,RFC3,RFC4,RFC5,RPA1,RPA3,RRM1,RRM2,SET,SSRP1,SLBP,CHAF1B,SMC1A,CDC7,CDC45,TIMELESS,SMC3,CCNE2,EXO1,RECQL4,PCLAF,GINS1,CHAF1A,PARP2,ALYREF,RNASEH2A,POLD3,POLQ,DBF4,TOPBP1,BAZ1A,SUPT16H,GTPBP4,ORC6,POL…
4_Member	GO Biological Processes	GO:0006261	DNA-dependent DNA replication	-41.1599	-38.276	64/139	641,675,990,1017,1663,1763,2237,3159,3978,4171,4172,4173,4174,4175,4176,4361,4796,4998,5111,5422,5424,5426,5427,5557,5558,5888,5983,5984,5985,6117,7884,8243,8317,8318,9126,9134,9837,10038,10189,10714,10721,11073,11177,23594,23649,29980,51659,54962,55388,57697,63922,64710,64785,79075,79733,79892,80174,81620,84083,84296,90381,144455,146956,253714	BLM,BRCA2,CDC6,CDK2,DDX11,DNA2,FEN1,HMGA1,LIG1,MCM2,MCM3,MCM4,MCM5,MCM6,MCM7,MRE11,TONSL,ORC1,PCNA,POLA1,POLD1,POLE,POLE2,PRIM1,PRIM2,RAD51,RFC3,RFC4,RFC5,RPA1,SLBP,SMC1A,CDC7,CDC45,SMC3,CCNE2,GINS1,PARP2,ALYREF,POLD3,POLQ,TOPBP1,BAZ1A,ORC6,POLA2,DONSON,GINS2,TIPIN,MCM10,FANCM,CHTF18,NUCKS1,GINS3,DSCC1,E2F8,MCMBP,DBF4B,CDT1,ZRANB3,GINS4,TICRR,E2F7,EME1,MMS22L
4_Member	GO Biological Processes	GO:0006275	regulation of DNA replication	-14.2758	-12.093	33/114	641,675,983,990,1017,1763,3265,4361,4771,5111,5983,5984,5985,8243,8317,9126,23560,27101,51053,54962,55704,56034,57695,63922,64710,79075,79733,80174,81620,84083,90381,144455,157570	BLM,BRCA2,CDK1,CDC6,CDK2,DNA2,HRAS,MRE11,NF2,PCNA,RFC3,RFC4,RFC5,SMC1A,CDC7,SMC3,GTPBP4,CACYBP,GMNN,TIPIN,CCDC88A,PDGFC,USP37,CHTF18,NUCKS1,DSCC1,E2F8,DBF4B,CDT1,ZRANB3,TICRR,E2F7,ESCO2
4_Member	GO Biological Processes	GO:0090329	regulation of DNA-dependent DNA replication	-12.4679	-10.369	19/42	641,675,1017,4361,5983,5984,5985,8243,8317,9126,54962,63922,79075,79733,80174,81620,84083,90381,144455	BLM,BRCA2,CDK2,MRE11,RFC3,RFC4,RFC5,SMC1A,CDC7,SMC3,TIPIN,CHTF18,DSCC1,E2F8,DBF4B,CDT1,ZRANB3,TICRR,E2F7
5_Summary	GO Biological Processes	GO:0044772	mitotic cell cycle phase transition	-49.311	-46.264	131/506	328,595,596,641,699,701,890,891,983,990,993,995,1017,1021,1029,1031,1032,1033,1062,1063,1104,1163,1719,1778,1869,1978,2146,2305,2935,3161,3320,3398,3688,4085,4171,4172,4173,4174,4175,4176,4331,4361,4751,4869,4998,5111,5116,5347,5422,5426,5427,5557,5558,5569,5591,5700,5702,5705,5708,5717,5902,5932,6117,6119,6241,6790,7027,7272,7283,7298,7517,8091,8317,8318,9088,9133,9134,9700,9735,9787,9793,9833,9…	APEX1,CCND1,BCL2,BLM,BUB1,BUB1B,CCNA2,CCNB1,CDK1,CDC6,CDC25A,CDC25C,CDK2,CDK6,CDKN2A,CDKN2C,CDKN2D,CDKN3,CENPE,CENPF,RCC1,CKS1B,DHFR,DYNC1H1,E2F1,EIF4EBP1,EZH2,FOXM1,GSPT1,HMMR,HSP90AA1,ID2,ITGB1,MAD2L1,MCM2,MCM3,MCM4,MCM5,MCM6,MCM7,MNAT1,MRE11,NEK2,NPM1,ORC1,PCNA,PCNT,PLK1,POLA1,POLE,POLE2,PRIM1,PRIM2,PKIA,PRKDC,PSMC1,PSMC3,PSMC5,PSMD2,PSMD11,RANBP1,RBBP8,RPA1,RPA3,RRM2,AURKA,TFDP1,TTK,TUBG1,TYM…
5_Member	GO Biological Processes	GO:0044772	mitotic cell cycle phase transition	-49.311	-46.264	131/506	328,595,596,641,699,701,890,891,983,990,993,995,1017,1021,1029,1031,1032,1033,1062,1063,1104,1163,1719,1778,1869,1978,2146,2305,2935,3161,3320,3398,3688,4085,4171,4172,4173,4174,4175,4176,4331,4361,4751,4869,4998,5111,5116,5347,5422,5426,5427,5557,5558,5569,5591,5700,5702,5705,5708,5717,5902,5932,6117,6119,6241,6790,7027,7272,7283,7298,7517,8091,8317,8318,9088,9133,9134,9700,9735,9787,9793,9833,9…	APEX1,CCND1,BCL2,BLM,BUB1,BUB1B,CCNA2,CCNB1,CDK1,CDC6,CDC25A,CDC25C,CDK2,CDK6,CDKN2A,CDKN2C,CDKN2D,CDKN3,CENPE,CENPF,RCC1,CKS1B,DHFR,DYNC1H1,E2F1,EIF4EBP1,EZH2,FOXM1,GSPT1,HMMR,HSP90AA1,ID2,ITGB1,MAD2L1,MCM2,MCM3,MCM4,MCM5,MCM6,MCM7,MNAT1,MRE11,NEK2,NPM1,ORC1,PCNA,PCNT,PLK1,POLA1,POLE,POLE2,PRIM1,PRIM2,PKIA,PRKDC,PSMC1,PSMC3,PSMC5,PSMD2,PSMD11,RANBP1,RBBP8,RPA1,RPA3,RRM2,AURKA,TFDP1,TTK,TUBG1,TYM…
5_Member	GO Biological Processes	GO:0044770	cell cycle phase transition	-48.8554	-45.835	134/533	328,595,596,641,699,701,890,891,983,990,993,995,1017,1021,1029,1031,1032,1033,1062,1063,1104,1163,1719,1778,1869,1978,2146,2305,2935,3161,3320,3398,3688,4085,4171,4172,4173,4174,4175,4176,4331,4361,4751,4869,4998,5111,5116,5347,5422,5426,5427,5557,5558,5569,5591,5700,5702,5705,5708,5717,5902,5932,6117,6119,6241,6790,7027,7272,7283,7298,7517,8091,8317,8318,8914,9088,9133,9134,9700,9735,9787,9793,9…	APEX1,CCND1,BCL2,BLM,BUB1,BUB1B,CCNA2,CCNB1,CDK1,CDC6,CDC25A,CDC25C,CDK2,CDK6,CDKN2A,CDKN2C,CDKN2D,CDKN3,CENPE,CENPF,RCC1,CKS1B,DHFR,DYNC1H1,E2F1,EIF4EBP1,EZH2,FOXM1,GSPT1,HMMR,HSP90AA1,ID2,ITGB1,MAD2L1,MCM2,MCM3,MCM4,MCM5,MCM6,MCM7,MNAT1,MRE11,NEK2,NPM1,ORC1,PCNA,PCNT,PLK1,POLA1,POLE,POLE2,PRIM1,PRIM2,PKIA,PRKDC,PSMC1,PSMC3,PSMC5,PSMD2,PSMD11,RANBP1,RBBP8,RPA1,RPA3,RRM2,AURKA,TFDP1,TTK,TUBG1,TYM…
5_Member	GO Biological Processes	GO:0051726	regulation of cell cycle	-41.4141	-38.485	176/993	328,329,332,387,440,580,595,596,641,672,675,699,701,805,858,890,891,899,983,990,991,993,995,1017,1021,1029,1031,1032,1033,1062,1063,1104,1163,1663,1763,1869,1870,1894,1906,1950,1978,2146,2189,2237,2305,2852,3014,3265,3398,3688,3832,4085,4288,4331,4361,4436,4605,4751,4824,4869,5036,5111,5347,5569,5591,5700,5702,5705,5708,5717,5796,5885,5891,5902,5932,5933,6119,6491,6790,7023,7027,7051,7153,7272,75…	APEX1,BIRC2,BIRC5,RHOA,ASNS,BARD1,CCND1,BCL2,BLM,BRCA1,BRCA2,BUB1,BUB1B,CALM2,CAV2,CCNA2,CCNB1,CCNF,CDK1,CDC6,CDC20,CDC25A,CDC25C,CDK2,CDK6,CDKN2A,CDKN2C,CDKN2D,CDKN3,CENPE,CENPF,RCC1,CKS1B,DDX11,DNA2,E2F1,E2F2,ECT2,EDN1,EGF,EIF4EBP1,EZH2,FANCG,FEN1,FOXM1,GPER1,H2AFX,HRAS,ID2,ITGB1,KIF11,MAD2L1,MKI67,MNAT1,MRE11,MSH2,MYBL2,NEK2,NKX3-1,NPM1,PA2G4,PCNA,PLK1,PKIA,PRKDC,PSMC1,PSMC3,PSMC5,PSMD2,PSMD11…
5_Member	GO Biological Processes	GO:0010564	regulation of cell cycle process	-31.933	-29.201	115/572	328,387,595,596,641,672,675,699,701,805,858,890,891,899,983,990,991,995,1017,1021,1062,1063,1104,1663,1869,1894,1906,1950,2146,2237,2305,2852,3398,3832,4085,4288,4361,4751,4869,5111,5347,5569,5591,5700,5702,5705,5708,5717,5885,5902,6491,6790,7023,7027,7272,7517,8091,8243,8317,8318,8502,8851,9088,9126,9184,9212,9493,9585,9700,9735,9787,9928,10403,10460,10615,10733,10755,10769,11065,11073,11113,229…	APEX1,RHOA,CCND1,BCL2,BLM,BRCA1,BRCA2,BUB1,BUB1B,CALM2,CAV2,CCNA2,CCNB1,CCNF,CDK1,CDC6,CDC20,CDC25C,CDK2,CDK6,CENPE,CENPF,RCC1,DDX11,E2F1,ECT2,EDN1,EGF,EZH2,FEN1,FOXM1,GPER1,ID2,KIF11,MAD2L1,MKI67,MRE11,NEK2,NPM1,PCNA,PLK1,PKIA,PRKDC,PSMC1,PSMC3,PSMC5,PSMD2,PSMD11,RAD21,RANBP1,STIL,AURKA,TFAP4,TFDP1,TTK,XRCC3,HMGA2,SMC1A,CDC7,CDC45,PKP4,CDK5R1,PKMYT1,SMC3,BUB3,AURKB,KIF23,KIF20B,ESPL1,KNTC1,DLGAP…
5_Member	GO Biological Processes	GO:0000075	cell cycle checkpoint	-27.9617	-25.354	65/221	595,641,672,699,701,891,983,990,995,1017,1063,1763,1869,2189,3014,3265,4085,4361,4436,4869,5111,5347,5591,5932,6790,7027,7153,7272,7517,8091,8243,8318,8682,9134,9184,9212,9575,9735,10403,10769,11073,11130,25906,51512,51514,54908,54962,55055,55159,55215,55835,57060,57082,63967,64858,81620,83903,83990,84126,84444,90381,144455,146956,220064,348654	CCND1,BLM,BRCA1,BUB1,BUB1B,CCNB1,CDK1,CDC6,CDC25C,CDK2,CENPF,DNA2,E2F1,FANCG,H2AFX,HRAS,MAD2L1,MRE11,MSH2,NPM1,PCNA,PLK1,PRKDC,RBBP8,AURKA,TFDP1,TOP2A,TTK,XRCC3,HMGA2,SMC1A,CDC45,PEA15,CCNE2,BUB3,AURKB,CLOCK,KNTC1,NDC80,PLK2,TOPBP1,ZWINT,ANAPC15,GTSE1,DTL,SPDL1,TIPIN,ZWILCH,RFWD3,FANCI,CENPJ,PCBP4,KNL1,CLSPN,DCLRE1B,CDT1,GSG2,BRIP1,ATRIP,DOT1L,TICRR,E2F7,EME1,ORAOV1,GEN1
5_Member	GO Biological Processes	GO:0044843	cell cycle G1/S phase transition	-26.9832	-24.404	68/250	328,595,596,890,891,983,990,993,995,1017,1021,1029,1031,1032,1033,1104,1719,1869,1978,2146,2935,3398,3688,4171,4172,4173,4174,4175,4176,4331,4869,4998,5111,5422,5426,5427,5557,5558,5591,5902,5932,6117,6119,6241,6790,7027,7298,8317,8318,9134,9928,10769,10926,23594,23649,26271,27085,51512,55159,55388,55835,57060,57695,81610,81620,84515,128239,144455	APEX1,CCND1,BCL2,CCNA2,CCNB1,CDK1,CDC6,CDC25A,CDC25C,CDK2,CDK6,CDKN2A,CDKN2C,CDKN2D,CDKN3,RCC1,DHFR,E2F1,EIF4EBP1,EZH2,GSPT1,ID2,ITGB1,MCM2,MCM3,MCM4,MCM5,MCM6,MCM7,MNAT1,NPM1,ORC1,PCNA,POLA1,POLE,POLE2,PRIM1,PRIM2,PRKDC,RANBP1,RBBP8,RPA1,RPA3,RRM2,AURKA,TFDP1,TYMS,CDC7,CDC45,CCNE2,KIF14,PLK2,DBF4,ORC6,POLA2,FBXO5,MTBP,GTSE1,RFWD3,MCM10,CENPJ,PCBP4,USP37,FAM83D,CDT1,MCM8,IQGAP3,E2F7
5_Member	GO Biological Processes	GO:0000082	G1/S transition of mitotic cell cycle	-26.8524	-24.283	66/237	328,595,596,891,983,990,993,995,1017,1021,1029,1031,1032,1033,1104,1719,1869,1978,2146,2935,3398,3688,4171,4172,4173,4174,4175,4176,4331,4869,4998,5111,5422,5426,5427,5557,5558,5591,5902,5932,6117,6119,6241,6790,7027,7298,8317,8318,9134,9928,10769,10926,23594,23649,26271,27085,51512,55159,55388,55835,57060,57695,81620,84515,128239,144455	APEX1,CCND1,BCL2,CCNB1,CDK1,CDC6,CDC25A,CDC25C,CDK2,CDK6,CDKN2A,CDKN2C,CDKN2D,CDKN3,RCC1,DHFR,E2F1,EIF4EBP1,EZH2,GSPT1,ID2,ITGB1,MCM2,MCM3,MCM4,MCM5,MCM6,MCM7,MNAT1,NPM1,ORC1,PCNA,POLA1,POLE,POLE2,PRIM1,PRIM2,PRKDC,RANBP1,RBBP8,RPA1,RPA3,RRM2,AURKA,TFDP1,TYMS,CDC7,CDC45,CCNE2,KIF14,PLK2,DBF4,ORC6,POLA2,FBXO5,MTBP,GTSE1,RFWD3,MCM10,CENPJ,PCBP4,USP37,CDT1,MCM8,IQGAP3,E2F7
5_Member	GO Biological Processes	GO:0007346	regulation of mitotic cell cycle	-26.7889	-24.228	99/502	328,332,440,595,596,641,675,699,701,858,890,891,983,990,991,995,1017,1021,1062,1063,1104,1163,1869,1906,1950,1978,2146,3265,3398,3832,4085,4288,4361,4436,4751,4824,4869,5111,5347,5569,5591,5700,5702,5705,5708,5717,5902,6119,6790,7027,7153,7272,7517,8091,8243,8317,8318,9088,9184,9585,9700,9735,9787,9928,10403,10460,10769,11065,11073,11130,22974,23198,25906,26271,27085,51203,51512,54443,54962,55055…	APEX1,BIRC5,ASNS,CCND1,BCL2,BLM,BRCA2,BUB1,BUB1B,CAV2,CCNA2,CCNB1,CDK1,CDC6,CDC20,CDC25C,CDK2,CDK6,CENPE,CENPF,RCC1,CKS1B,E2F1,EDN1,EGF,EIF4EBP1,EZH2,HRAS,ID2,KIF11,MAD2L1,MKI67,MRE11,MSH2,NEK2,NKX3-1,NPM1,PCNA,PLK1,PKIA,PRKDC,PSMC1,PSMC3,PSMC5,PSMD2,PSMD11,RANBP1,RPA3,AURKA,TFDP1,TOP2A,TTK,XRCC3,HMGA2,SMC1A,CDC7,CDC45,PKMYT1,BUB3,KIF20B,ESPL1,KNTC1,DLGAP5,KIF14,NDC80,TACC3,PLK2,UBE2C,TOPBP1,ZWIN…
5_Member	GO Biological Processes	GO:0045786	negative regulation of cell cycle	-22.9916	-20.489	99/560	580,595,596,641,672,699,701,891,899,983,990,995,1017,1021,1029,1031,1032,1033,1063,1763,1869,2146,2189,2305,2852,3014,3265,3398,4085,4361,4436,4824,4869,5036,5111,5347,5591,5700,5702,5705,5708,5717,5796,5932,6790,7023,7027,7153,7272,7517,8091,8243,8318,8682,8851,9126,9134,9184,9212,9575,9585,9700,9735,10403,10634,10769,11073,11130,23198,23645,25906,26271,27085,51053,51512,51514,54908,54962,55055,…	BARD1,CCND1,BCL2,BLM,BRCA1,BUB1,BUB1B,CCNB1,CCNF,CDK1,CDC6,CDC25C,CDK2,CDK6,CDKN2A,CDKN2C,CDKN2D,CDKN3,CENPF,DNA2,E2F1,EZH2,FANCG,FOXM1,GPER1,H2AFX,HRAS,ID2,MAD2L1,MRE11,MSH2,NKX3-1,NPM1,PA2G4,PCNA,PLK1,PRKDC,PSMC1,PSMC3,PSMC5,PSMD2,PSMD11,PTPRK,RBBP8,AURKA,TFAP4,TFDP1,TOP2A,TTK,XRCC3,HMGA2,SMC1A,CDC45,PEA15,CDK5R1,SMC3,CCNE2,BUB3,AURKB,CLOCK,KIF20B,ESPL1,KNTC1,NDC80,GAS2L1,PLK2,TOPBP1,ZWINT,PSME…
5_Member	GO Biological Processes	GO:1901990	regulation of mitotic cell cycle phase transition	-19.3222	-16.922	65/308	328,595,596,641,699,701,890,891,983,990,991,995,1017,1021,1062,1063,1869,2146,3398,4085,4361,4869,5111,5347,5569,5591,5700,5702,5705,5708,5717,6790,7027,7272,7517,8091,8317,8318,9184,9700,9735,9787,9928,10403,10769,11065,11073,23198,25906,26271,27085,51512,54443,55159,55215,55835,57060,63967,79915,80174,90381,113130,144455,220064,348654	APEX1,CCND1,BCL2,BLM,BUB1,BUB1B,CCNA2,CCNB1,CDK1,CDC6,CDC20,CDC25C,CDK2,CDK6,CENPE,CENPF,E2F1,EZH2,ID2,MAD2L1,MRE11,NPM1,PCNA,PLK1,PKIA,PRKDC,PSMC1,PSMC3,PSMC5,PSMD2,PSMD11,AURKA,TFDP1,TTK,XRCC3,HMGA2,CDC7,CDC45,BUB3,ESPL1,KNTC1,DLGAP5,KIF14,NDC80,PLK2,UBE2C,TOPBP1,PSME4,ANAPC15,FBXO5,MTBP,GTSE1,ANLN,RFWD3,FANCI,CENPJ,PCBP4,CLSPN,ATAD5,DBF4B,TICRR,CDCA5,E2F7,ORAOV1,GEN1
5_Member	GO Biological Processes	GO:0007093	mitotic cell cycle checkpoint	-19.0614	-16.68	44/150	595,641,699,701,891,983,995,1017,1063,1869,3265,4085,4361,4436,4869,5111,5347,5591,6790,7027,7153,7272,7517,8091,8243,9735,10403,10769,11073,11130,25906,51512,54962,55055,55159,55215,55835,57060,63967,90381,144455,146956,220064,348654	CCND1,BLM,BUB1,BUB1B,CCNB1,CDK1,CDC25C,CDK2,CENPF,E2F1,HRAS,MAD2L1,MRE11,MSH2,NPM1,PCNA,PLK1,PRKDC,AURKA,TFDP1,TOP2A,TTK,XRCC3,HMGA2,SMC1A,KNTC1,NDC80,PLK2,TOPBP1,ZWINT,ANAPC15,GTSE1,TIPIN,ZWILCH,RFWD3,FANCI,CENPJ,PCBP4,CLSPN,TICRR,E2F7,EME1,ORAOV1,GEN1
5_Member	GO Biological Processes	GO:1901987	regulation of cell cycle phase transition	-18.385	-16.032	66/329	328,595,596,641,699,701,890,891,983,990,991,995,1017,1021,1062,1063,1869,2146,3398,4085,4361,4869,5111,5347,5569,5591,5700,5702,5705,5708,5717,6790,7027,7272,7517,8091,8317,8318,9184,9700,9735,9787,9928,10403,10769,11065,11073,23198,25906,26271,27085,51512,54443,55159,55215,55835,57060,63967,79915,80174,81610,90381,113130,144455,220064,348654	APEX1,CCND1,BCL2,BLM,BUB1,BUB1B,CCNA2,CCNB1,CDK1,CDC6,CDC20,CDC25C,CDK2,CDK6,CENPE,CENPF,E2F1,EZH2,ID2,MAD2L1,MRE11,NPM1,PCNA,PLK1,PKIA,PRKDC,PSMC1,PSMC3,PSMC5,PSMD2,PSMD11,AURKA,TFDP1,TTK,XRCC3,HMGA2,CDC7,CDC45,BUB3,ESPL1,KNTC1,DLGAP5,KIF14,NDC80,PLK2,UBE2C,TOPBP1,PSME4,ANAPC15,FBXO5,MTBP,GTSE1,ANLN,RFWD3,FANCI,CENPJ,PCBP4,CLSPN,ATAD5,DBF4B,FAM83D,TICRR,CDCA5,E2F7,ORAOV1,GEN1
5_Member	GO Biological Processes	GO:0031570	DNA integrity checkpoint	-17.0601	-14.754	43/160	595,641,672,891,983,990,995,1017,1763,1869,3014,4361,4436,4869,5111,5347,5591,5932,6790,7027,7153,8091,8318,8682,9575,10769,11073,51512,51514,54962,55159,55215,55835,57060,63967,81620,83990,84126,84444,90381,144455,146956,220064	CCND1,BLM,BRCA1,CCNB1,CDK1,CDC6,CDC25C,CDK2,DNA2,E2F1,H2AFX,MRE11,MSH2,NPM1,PCNA,PLK1,PRKDC,RBBP8,AURKA,TFDP1,TOP2A,HMGA2,CDC45,PEA15,CLOCK,PLK2,TOPBP1,GTSE1,DTL,TIPIN,RFWD3,FANCI,CENPJ,PCBP4,CLSPN,CDT1,BRIP1,ATRIP,DOT1L,TICRR,E2F7,EME1,ORAOV1
5_Member	GO Biological Processes	GO:0010948	negative regulation of cell cycle process	-15.5283	-13.277	54/264	595,596,641,672,699,701,891,899,983,995,1017,1063,1869,2146,2852,4085,4361,4869,5111,5347,5591,5700,5702,5705,5708,5717,6790,7023,7027,7272,7517,8091,8243,9126,9212,9700,10403,10769,11073,23198,25906,26271,27085,51512,55159,55215,55835,57060,63967,79733,90381,144455,220064,348654	CCND1,BCL2,BLM,BRCA1,BUB1,BUB1B,CCNB1,CCNF,CDK1,CDC25C,CDK2,CENPF,E2F1,EZH2,GPER1,MAD2L1,MRE11,NPM1,PCNA,PLK1,PRKDC,PSMC1,PSMC3,PSMC5,PSMD2,PSMD11,AURKA,TFAP4,TFDP1,TTK,XRCC3,HMGA2,SMC1A,SMC3,AURKB,ESPL1,NDC80,PLK2,TOPBP1,PSME4,ANAPC15,FBXO5,MTBP,GTSE1,RFWD3,FANCI,CENPJ,PCBP4,CLSPN,E2F8,TICRR,E2F7,ORAOV1,GEN1
5_Member	GO Biological Processes	GO:0045930	negative regulation of mitotic cell cycle	-15.1602	-12.935	54/269	595,596,641,699,701,891,983,995,1017,1063,1869,2146,3265,4085,4361,4436,4824,4869,5111,5347,5591,5700,5702,5705,5708,5717,6790,7027,7153,7272,7517,8091,8243,9735,10403,10769,11073,11130,23198,25906,27085,51512,54962,55055,55159,55215,55835,57060,63967,90381,144455,146956,220064,348654	CCND1,BCL2,BLM,BUB1,BUB1B,CCNB1,CDK1,CDC25C,CDK2,CENPF,E2F1,EZH2,HRAS,MAD2L1,MRE11,MSH2,NKX3-1,NPM1,PCNA,PLK1,PRKDC,PSMC1,PSMC3,PSMC5,PSMD2,PSMD11,AURKA,TFDP1,TOP2A,TTK,XRCC3,HMGA2,SMC1A,KNTC1,NDC80,PLK2,TOPBP1,ZWINT,PSME4,ANAPC15,MTBP,GTSE1,TIPIN,ZWILCH,RFWD3,FANCI,CENPJ,PCBP4,CLSPN,TICRR,E2F7,EME1,ORAOV1,GEN1
5_Member	GO Biological Processes	GO:1901991	negative regulation of mitotic cell cycle phase transition	-13.6972	-11.543	43/195	595,596,641,699,701,891,983,995,1017,1063,1869,2146,4085,4361,4869,5111,5347,5591,5700,5702,5705,5708,5717,6790,7027,7272,7517,8091,10403,10769,11073,23198,25906,51512,55159,55215,55835,57060,63967,90381,144455,220064,348654	CCND1,BCL2,BLM,BUB1,BUB1B,CCNB1,CDK1,CDC25C,CDK2,CENPF,E2F1,EZH2,MAD2L1,MRE11,NPM1,PCNA,PLK1,PRKDC,PSMC1,PSMC3,PSMC5,PSMD2,PSMD11,AURKA,TFDP1,TTK,XRCC3,HMGA2,NDC80,PLK2,TOPBP1,PSME4,ANAPC15,GTSE1,RFWD3,FANCI,CENPJ,PCBP4,CLSPN,TICRR,E2F7,ORAOV1,GEN1
5_Member	GO Biological Processes	GO:0000077	DNA damage checkpoint	-13.4879	-11.341	37/150	595,641,672,891,983,995,1017,1869,3014,4361,4436,4869,5111,5347,5591,5932,6790,7027,8091,8682,9575,10769,11073,51512,51514,54962,55159,55215,55835,57060,63967,83990,84126,84444,144455,146956,220064	CCND1,BLM,BRCA1,CCNB1,CDK1,CDC25C,CDK2,E2F1,H2AFX,MRE11,MSH2,NPM1,PCNA,PLK1,PRKDC,RBBP8,AURKA,TFDP1,HMGA2,PEA15,CLOCK,PLK2,TOPBP1,GTSE1,DTL,TIPIN,RFWD3,FANCI,CENPJ,PCBP4,CLSPN,BRIP1,ATRIP,DOT1L,E2F7,EME1,ORAOV1
5_Member	GO Biological Processes	GO:1901988	negative regulation of cell cycle phase transition	-13.0498	-10.923	43/203	595,596,641,699,701,891,983,995,1017,1063,1869,2146,4085,4361,4869,5111,5347,5591,5700,5702,5705,5708,5717,6790,7027,7272,7517,8091,10403,10769,11073,23198,25906,51512,55159,55215,55835,57060,63967,90381,144455,220064,348654	CCND1,BCL2,BLM,BUB1,BUB1B,CCNB1,CDK1,CDC25C,CDK2,CENPF,E2F1,EZH2,MAD2L1,MRE11,NPM1,PCNA,PLK1,PRKDC,PSMC1,PSMC3,PSMC5,PSMD2,PSMD11,AURKA,TFDP1,TTK,XRCC3,HMGA2,NDC80,PLK2,TOPBP1,PSME4,ANAPC15,GTSE1,RFWD3,FANCI,CENPJ,PCBP4,CLSPN,TICRR,E2F7,ORAOV1,GEN1
5_Member	GO Biological Processes	GO:0044774	mitotic DNA integrity checkpoint	-12.1702	-10.095	29/104	595,641,891,983,995,1017,1869,4361,4436,4869,5111,5591,6790,7027,7153,8091,10769,11073,51512,54962,55159,55215,55835,57060,63967,90381,144455,146956,220064	CCND1,BLM,CCNB1,CDK1,CDC25C,CDK2,E2F1,MRE11,MSH2,NPM1,PCNA,PRKDC,AURKA,TFDP1,TOP2A,HMGA2,PLK2,TOPBP1,GTSE1,TIPIN,RFWD3,FANCI,CENPJ,PCBP4,CLSPN,TICRR,E2F7,EME1,ORAOV1
5_Member	GO Biological Processes	GO:0044773	mitotic DNA damage checkpoint	-10.5551	-8.581	26/97	595,641,891,983,995,1017,1869,4361,4436,4869,5111,5591,6790,7027,8091,10769,11073,51512,54962,55159,55215,55835,57060,144455,146956,220064	CCND1,BLM,CCNB1,CDK1,CDC25C,CDK2,E2F1,MRE11,MSH2,NPM1,PCNA,PRKDC,AURKA,TFDP1,HMGA2,PLK2,TOPBP1,GTSE1,TIPIN,RFWD3,FANCI,CENPJ,PCBP4,E2F7,EME1,ORAOV1
5_Member	Reactome Gene Sets	R-HSA-6791312	TP53 Regulates Transcription of Cell Cycle Genes	-8.10034	-6.307	16/49	890,891,983,995,1017,1869,4869,5111,5933,6790,7027,9134,10769,55835,57060,144455	CCNA2,CCNB1,CDK1,CDC25C,CDK2,E2F1,NPM1,PCNA,RBL1,AURKA,TFDP1,CCNE2,PLK2,CENPJ,PCBP4,E2F7
5_Member	GO Biological Processes	GO:0042770	signal transduction in response to DNA damage	-7.71854	-5.955	25/120	672,675,891,983,995,1017,1869,2305,4869,5111,5366,5591,6790,7023,7027,8243,9100,9521,10769,27063,27330,51512,55835,57060,144455	BRCA1,BRCA2,CCNB1,CDK1,CDC25C,CDK2,E2F1,FOXM1,NPM1,PCNA,PMAIP1,PRKDC,AURKA,TFAP4,TFDP1,SMC1A,USP10,EEF1E1,PLK2,ANKRD1,RPS6KA6,GTSE1,CENPJ,PCBP4,E2F7
5_Member	GO Biological Processes	GO:0007050	cell cycle arrest	-7.60265	-5.846	38/244	580,595,672,891,983,995,1017,1021,1029,1031,1032,1033,1869,2305,2852,3265,3398,4436,4824,4869,5036,5111,6790,7023,7027,8091,8851,9585,10634,10769,23645,27085,51512,55771,55835,57060,144455,220042	BARD1,CCND1,BRCA1,CCNB1,CDK1,CDC25C,CDK2,CDK6,CDKN2A,CDKN2C,CDKN2D,CDKN3,E2F1,FOXM1,GPER1,HRAS,ID2,MSH2,NKX3-1,NPM1,PA2G4,PCNA,AURKA,TFAP4,TFDP1,HMGA2,CDK5R1,KIF20B,GAS2L1,PLK2,PPP1R15A,MTBP,GTSE1,PRR11,CENPJ,PCBP4,E2F7,DDIAS
5_Member	GO Biological Processes	GO:0030330	DNA damage response, signal transduction by p53 class mediator	-7.50241	-5.758	23/106	672,675,891,983,995,1017,1869,2305,4869,5111,5366,6790,7023,7027,9100,9521,10769,27063,27330,51512,55835,57060,144455	BRCA1,BRCA2,CCNB1,CDK1,CDC25C,CDK2,E2F1,FOXM1,NPM1,PCNA,PMAIP1,AURKA,TFAP4,TFDP1,USP10,EEF1E1,PLK2,ANKRD1,RPS6KA6,GTSE1,CENPJ,PCBP4,E2F7
5_Member	GO Biological Processes	GO:0071156	regulation of cell cycle arrest	-6.84165	-5.159	22/106	595,672,891,983,995,1017,1869,2305,2852,3398,4869,5111,6790,7023,7027,8091,8851,10769,51512,55835,57060,144455	CCND1,BRCA1,CCNB1,CDK1,CDC25C,CDK2,E2F1,FOXM1,GPER1,ID2,NPM1,PCNA,AURKA,TFAP4,TFDP1,HMGA2,CDK5R1,PLK2,GTSE1,CENPJ,PCBP4,E2F7
5_Member	GO Biological Processes	GO:2000045	regulation of G1/S transition of mitotic cell cycle	-6.66476	-5.008	25/135	328,595,596,891,983,990,995,1017,1869,2146,3398,4869,5111,5591,6790,7027,8318,9928,10769,27085,51512,55159,55835,57060,144455	APEX1,CCND1,BCL2,CCNB1,CDK1,CDC6,CDC25C,CDK2,E2F1,EZH2,ID2,NPM1,PCNA,PRKDC,AURKA,TFDP1,CDC45,KIF14,PLK2,MTBP,GTSE1,RFWD3,CENPJ,PCBP4,E2F7
5_Member	GO Biological Processes	GO:0044819	mitotic G1/S transition checkpoint	-6.54951	-4.909	17/69	595,891,983,995,1017,1869,4869,5111,5591,6790,7027,10769,51512,55159,55835,57060,144455	CCND1,CCNB1,CDK1,CDC25C,CDK2,E2F1,NPM1,PCNA,PRKDC,AURKA,TFDP1,PLK2,GTSE1,RFWD3,CENPJ,PCBP4,E2F7
5_Member	GO Biological Processes	GO:0031571	mitotic G1 DNA damage checkpoint	-6.54951	-4.909	17/69	595,891,983,995,1017,1869,4869,5111,5591,6790,7027,10769,51512,55159,55835,57060,144455	CCND1,CCNB1,CDK1,CDC25C,CDK2,E2F1,NPM1,PCNA,PRKDC,AURKA,TFDP1,PLK2,GTSE1,RFWD3,CENPJ,PCBP4,E2F7
5_Member	GO Biological Processes	GO:1902806	regulation of cell cycle G1/S phase transition	-6.49477	-4.863	26/147	328,595,596,891,983,990,995,1017,1869,2146,3398,4869,5111,5591,6790,7027,8318,9928,10769,27085,51512,55159,55835,57060,81610,144455	APEX1,CCND1,BCL2,CCNB1,CDK1,CDC6,CDC25C,CDK2,E2F1,EZH2,ID2,NPM1,PCNA,PRKDC,AURKA,TFDP1,CDC45,KIF14,PLK2,MTBP,GTSE1,RFWD3,CENPJ,PCBP4,FAM83D,E2F7
5_Member	GO Biological Processes	GO:0044783	G1 DNA damage checkpoint	-6.4526	-4.823	17/70	595,891,983,995,1017,1869,4869,5111,5591,6790,7027,10769,51512,55159,55835,57060,144455	CCND1,CCNB1,CDK1,CDC25C,CDK2,E2F1,NPM1,PCNA,PRKDC,AURKA,TFDP1,PLK2,GTSE1,RFWD3,CENPJ,PCBP4,E2F7
5_Member	GO Biological Processes	GO:0071158	positive regulation of cell cycle arrest	-6.09179	-4.489	18/82	672,891,983,995,1017,1869,3398,4869,5111,6790,7027,8091,8851,10769,51512,55835,57060,144455	BRCA1,CCNB1,CDK1,CDC25C,CDK2,E2F1,ID2,NPM1,PCNA,AURKA,TFDP1,HMGA2,CDK5R1,PLK2,GTSE1,CENPJ,PCBP4,E2F7
5_Member	GO Biological Processes	GO:2000134	negative regulation of G1/S transition of mitotic cell cycle	-5.96282	-4.375	19/92	595,596,891,983,995,1017,1869,2146,4869,5111,5591,6790,7027,10769,51512,55159,55835,57060,144455	CCND1,BCL2,CCNB1,CDK1,CDC25C,CDK2,E2F1,EZH2,NPM1,PCNA,PRKDC,AURKA,TFDP1,PLK2,GTSE1,RFWD3,CENPJ,PCBP4,E2F7
5_Member	GO Biological Processes	GO:1902400	intracellular signal transduction involved in G1 DNA damage checkpoint	-5.84086	-4.268	15/61	891,983,995,1017,1869,4869,5111,5591,6790,7027,10769,51512,55835,57060,144455	CCNB1,CDK1,CDC25C,CDK2,E2F1,NPM1,PCNA,PRKDC,AURKA,TFDP1,PLK2,GTSE1,CENPJ,PCBP4,E2F7
5_Member	GO Biological Processes	GO:0072431	signal transduction involved in mitotic G1 DNA damage checkpoint	-5.84086	-4.268	15/61	891,983,995,1017,1869,4869,5111,5591,6790,7027,10769,51512,55835,57060,144455	CCNB1,CDK1,CDC25C,CDK2,E2F1,NPM1,PCNA,PRKDC,AURKA,TFDP1,PLK2,GTSE1,CENPJ,PCBP4,E2F7
5_Member	GO Biological Processes	GO:1902403	signal transduction involved in mitotic DNA integrity checkpoint	-5.74429	-4.185	15/62	891,983,995,1017,1869,4869,5111,5591,6790,7027,10769,51512,55835,57060,144455	CCNB1,CDK1,CDC25C,CDK2,E2F1,NPM1,PCNA,PRKDC,AURKA,TFDP1,PLK2,GTSE1,CENPJ,PCBP4,E2F7
5_Member	GO Biological Processes	GO:1902402	signal transduction involved in mitotic DNA damage checkpoint	-5.74429	-4.185	15/62	891,983,995,1017,1869,4869,5111,5591,6790,7027,10769,51512,55835,57060,144455	CCNB1,CDK1,CDC25C,CDK2,E2F1,NPM1,PCNA,PRKDC,AURKA,TFDP1,PLK2,GTSE1,CENPJ,PCBP4,E2F7
5_Member	GO Biological Processes	GO:0072413	signal transduction involved in mitotic cell cycle checkpoint	-5.74429	-4.185	15/62	891,983,995,1017,1869,4869,5111,5591,6790,7027,10769,51512,55835,57060,144455	CCNB1,CDK1,CDC25C,CDK2,E2F1,NPM1,PCNA,PRKDC,AURKA,TFDP1,PLK2,GTSE1,CENPJ,PCBP4,E2F7
5_Member	GO Biological Processes	GO:1902807	negative regulation of cell cycle G1/S phase transition	-5.74054	-4.184	19/95	595,596,891,983,995,1017,1869,2146,4869,5111,5591,6790,7027,10769,51512,55159,55835,57060,144455	CCND1,BCL2,CCNB1,CDK1,CDC25C,CDK2,E2F1,EZH2,NPM1,PCNA,PRKDC,AURKA,TFDP1,PLK2,GTSE1,RFWD3,CENPJ,PCBP4,E2F7
5_Member	GO Biological Processes	GO:0072401	signal transduction involved in DNA integrity checkpoint	-5.55765	-4.013	15/64	891,983,995,1017,1869,4869,5111,5591,6790,7027,10769,51512,55835,57060,144455	CCNB1,CDK1,CDC25C,CDK2,E2F1,NPM1,PCNA,PRKDC,AURKA,TFDP1,PLK2,GTSE1,CENPJ,PCBP4,E2F7
5_Member	GO Biological Processes	GO:0072422	signal transduction involved in DNA damage checkpoint	-5.55765	-4.013	15/64	891,983,995,1017,1869,4869,5111,5591,6790,7027,10769,51512,55835,57060,144455	CCNB1,CDK1,CDC25C,CDK2,E2F1,NPM1,PCNA,PRKDC,AURKA,TFDP1,PLK2,GTSE1,CENPJ,PCBP4,E2F7
5_Member	GO Biological Processes	GO:0072395	signal transduction involved in cell cycle checkpoint	-5.46742	-3.933	15/65	891,983,995,1017,1869,4869,5111,5591,6790,7027,10769,51512,55835,57060,144455	CCNB1,CDK1,CDC25C,CDK2,E2F1,NPM1,PCNA,PRKDC,AURKA,TFDP1,PLK2,GTSE1,CENPJ,PCBP4,E2F7
5_Member	GO Biological Processes	GO:0006977	DNA damage response, signal transduction by p53 class mediator resulting in cell cycle arrest	-5.2034	-3.693	14/60	891,983,995,1017,1869,4869,5111,6790,7027,10769,51512,55835,57060,144455	CCNB1,CDK1,CDC25C,CDK2,E2F1,NPM1,PCNA,AURKA,TFDP1,PLK2,GTSE1,CENPJ,PCBP4,E2F7
6_Summary	GO Biological Processes	GO:0000226	microtubule cytoskeleton organization	-41.1471	-38.276	113/449	329,330,332,387,672,675,891,899,983,991,1017,1058,1104,1778,1855,2597,3832,3837,3925,4000,4130,4131,4605,4627,4751,4869,5116,5347,5901,5902,6491,6674,6790,7272,7283,7430,7516,7517,8243,8851,9055,9181,9212,9493,9700,9768,9793,9833,9928,10112,10376,10403,10426,10460,10579,10615,10733,10769,11004,22974,22995,23093,23224,23354,24137,25777,25886,26271,26586,28989,29127,29899,50861,51199,51203,54801,54…	BIRC2,BIRC3,BIRC5,RHOA,BRCA1,BRCA2,CCNB1,CCNF,CDK1,CDC20,CDK2,CENPA,RCC1,DYNC1H1,DVL1,GAPDH,KIF11,KPNB1,STMN1,LMNA,MAP1A,MAP1B,MYBL2,MYH9,NEK2,NPM1,PCNT,PLK1,RAN,RANBP1,STIL,SPAG1,AURKA,TTK,TUBG1,EZR,XRCC2,XRCC3,SMC1A,CDK5R1,PRC1,ARHGEF2,AURKB,KIF23,ESPL1,PCLAF,CKAP5,MELK,KIF14,KIF20A,TUBA1B,NDC80,TUBGCP3,TACC3,TACC2,SPAG5,PLK4,PLK2,KIF2C,TPX2,CEP152,TTLL5,SYNE2,HAUS5,KIF4A,SUN2,POC1A,FBXO5,CKAP2…
6_Member	GO Biological Processes	GO:0000226	microtubule cytoskeleton organization	-41.1471	-38.276	113/449	329,330,332,387,672,675,891,899,983,991,1017,1058,1104,1778,1855,2597,3832,3837,3925,4000,4130,4131,4605,4627,4751,4869,5116,5347,5901,5902,6491,6674,6790,7272,7283,7430,7516,7517,8243,8851,9055,9181,9212,9493,9700,9768,9793,9833,9928,10112,10376,10403,10426,10460,10579,10615,10733,10769,11004,22974,22995,23093,23224,23354,24137,25777,25886,26271,26586,28989,29127,29899,50861,51199,51203,54801,54…	BIRC2,BIRC3,BIRC5,RHOA,BRCA1,BRCA2,CCNB1,CCNF,CDK1,CDC20,CDK2,CENPA,RCC1,DYNC1H1,DVL1,GAPDH,KIF11,KPNB1,STMN1,LMNA,MAP1A,MAP1B,MYBL2,MYH9,NEK2,NPM1,PCNT,PLK1,RAN,RANBP1,STIL,SPAG1,AURKA,TTK,TUBG1,EZR,XRCC2,XRCC3,SMC1A,CDK5R1,PRC1,ARHGEF2,AURKB,KIF23,ESPL1,PCLAF,CKAP5,MELK,KIF14,KIF20A,TUBA1B,NDC80,TUBGCP3,TACC3,TACC2,SPAG5,PLK4,PLK2,KIF2C,TPX2,CEP152,TTLL5,SYNE2,HAUS5,KIF4A,SUN2,POC1A,FBXO5,CKAP2…
6_Member	GO Biological Processes	GO:0007017	microtubule-based process	-36.7724	-33.999	131/647	329,330,332,387,672,675,891,899,983,991,1017,1058,1062,1104,1729,1778,1855,2597,3799,3832,3835,3837,3925,4000,4130,4131,4605,4627,4751,4803,4869,5116,5347,5901,5902,6491,6674,6790,7272,7283,7430,7516,7517,8243,8701,8851,9055,9181,9212,9493,9585,9700,9768,9787,9793,9833,9928,10096,10097,10112,10376,10381,10383,10403,10426,10460,10579,10615,10733,10769,11004,22974,22995,23093,23224,23354,23499,2413…	BIRC2,BIRC3,BIRC5,RHOA,BRCA1,BRCA2,CCNB1,CCNF,CDK1,CDC20,CDK2,CENPA,CENPE,RCC1,DIAPH1,DYNC1H1,DVL1,GAPDH,KIF5B,KIF11,KIF22,KPNB1,STMN1,LMNA,MAP1A,MAP1B,MYBL2,MYH9,NEK2,NGF,NPM1,PCNT,PLK1,RAN,RANBP1,STIL,SPAG1,AURKA,TTK,TUBG1,EZR,XRCC2,XRCC3,SMC1A,DNAH11,CDK5R1,PRC1,ARHGEF2,AURKB,KIF23,KIF20B,ESPL1,PCLAF,DLGAP5,CKAP5,MELK,KIF14,ACTR3,ACTR2,KIF20A,TUBA1B,TUBB3,TUBB4B,NDC80,TUBGCP3,TACC3,TACC2,SPAG5…
6_Member	GO Biological Processes	GO:0007051	spindle organization	-31.6825	-28.976	58/153	329,330,332,387,891,991,1104,1778,3832,3837,3925,4605,4627,4751,5116,5347,5901,5902,6491,6790,7272,7283,7430,8243,9055,9212,9493,9700,9793,10403,10426,10460,10615,10769,22974,23354,24137,25777,25886,26271,28989,29127,29899,54801,55142,55722,57405,79000,79598,79866,84722,90417,93323,140609,203068,259266,284403,440145	BIRC2,BIRC3,BIRC5,RHOA,CCNB1,CDC20,RCC1,DYNC1H1,KIF11,KPNB1,STMN1,MYBL2,MYH9,NEK2,PCNT,PLK1,RAN,RANBP1,STIL,AURKA,TTK,TUBG1,EZR,SMC1A,PRC1,AURKB,KIF23,ESPL1,CKAP5,NDC80,TUBGCP3,TACC3,SPAG5,PLK2,TPX2,HAUS5,KIF4A,SUN2,POC1A,FBXO5,NTMT1,RACGAP1,GPSM2,HAUS6,HAUS2,CEP72,SPC25,AUNIP,CEP97,BORA,PSRC1,KNSTRN,HAUS8,NEK7,TUBB,ASPM,WDR62,MZT1
6_Member	GO Biological Processes	GO:0007052	mitotic spindle organization	-22.2163	-19.744	39/99	329,330,332,387,891,991,1104,1778,3832,3837,3925,4605,4751,5116,5347,5901,6491,6790,7272,8243,9055,9212,9493,10403,10426,10460,10769,22974,24137,25777,25886,29127,29899,57405,79598,79866,84722,284403,440145	BIRC2,BIRC3,BIRC5,RHOA,CCNB1,CDC20,RCC1,DYNC1H1,KIF11,KPNB1,STMN1,MYBL2,NEK2,PCNT,PLK1,RAN,STIL,AURKA,TTK,SMC1A,PRC1,AURKB,KIF23,NDC80,TUBGCP3,TACC3,PLK2,TPX2,KIF4A,SUN2,POC1A,RACGAP1,GPSM2,SPC25,CEP97,BORA,PSRC1,WDR62,MZT1
6_Member	GO Biological Processes	GO:1902850	microtubule cytoskeleton organization involved in mitosis	-22.2163	-19.744	39/99	329,330,332,387,891,991,1104,1778,3832,3837,3925,4605,4751,5116,5347,5901,6491,6790,7272,8243,9055,9212,9493,10403,10426,10460,10769,22974,24137,25777,25886,29127,29899,57405,79598,79866,84722,284403,440145	BIRC2,BIRC3,BIRC5,RHOA,CCNB1,CDC20,RCC1,DYNC1H1,KIF11,KPNB1,STMN1,MYBL2,NEK2,PCNT,PLK1,RAN,STIL,AURKA,TTK,SMC1A,PRC1,AURKB,KIF23,NDC80,TUBGCP3,TACC3,PLK2,TPX2,KIF4A,SUN2,POC1A,RACGAP1,GPSM2,SPC25,CEP97,BORA,PSRC1,WDR62,MZT1
6_Member	GO Biological Processes	GO:0070925	organelle assembly	-15.1351	-12.914	101/742	70,71,329,330,332,387,672,708,983,991,1017,1058,1062,1063,1072,1073,1104,1778,1906,3320,3688,3832,3837,3880,3921,4478,4605,4751,4869,5116,5305,5347,5990,6382,6385,6491,6674,6790,7168,7283,7430,9181,9212,9493,9786,9790,9793,9948,10096,10097,10383,10426,10733,10769,10938,11151,22974,22995,23093,23216,23224,23354,23682,24137,25819,25886,26271,27063,29127,51154,51388,54443,54801,55130,55142,55704,557…	ACTC1,ACTG1,BIRC2,BIRC3,BIRC5,RHOA,BRCA1,C1QBP,CDK1,CDC20,CDK2,CENPA,CENPE,CENPF,CFL1,CFL2,RCC1,DYNC1H1,EDN1,HSP90AA1,ITGB1,KIF11,KPNB1,KRT19,RPSA,MSN,MYBL2,NEK2,NPM1,PCNT,PIP4K2A,PLK1,RFX2,SDC1,SDC4,STIL,SPAG1,AURKA,TPM1,TUBG1,EZR,ARHGEF2,AURKB,KIF23,KIAA0586,BMS1,CKAP5,WDR1,ACTR3,ACTR2,TUBB4B,TUBGCP3,PLK4,PLK2,EHD1,CORO1A,TPX2,CEP152,TTLL5,TBC1D1,SYNE2,HAUS5,RAB38,KIF4A,NOCT,POC1A,FBXO5,ANKRD1,…
6_Member	GO Biological Processes	GO:0051225	spindle assembly	-12.3059	-10.222	28/96	329,330,332,387,991,1104,3832,3837,4605,4751,5347,6790,9212,9493,10426,22974,23354,24137,26271,29127,54801,55142,79598,93323,140609,203068,259266,440145	BIRC2,BIRC3,BIRC5,RHOA,CDC20,RCC1,KIF11,KPNB1,MYBL2,NEK2,PLK1,AURKA,AURKB,KIF23,TUBGCP3,TPX2,HAUS5,KIF4A,FBXO5,RACGAP1,HAUS6,HAUS2,CEP97,HAUS8,NEK7,TUBB,ASPM,MZT1
6_Member	GO Biological Processes	GO:0090307	mitotic spindle assembly	-7.99022	-6.209	18/63	329,330,332,387,991,3832,3837,4605,4751,5347,9212,9493,10426,22974,24137,29127,79598,440145	BIRC2,BIRC3,BIRC5,RHOA,CDC20,KIF11,KPNB1,MYBL2,NEK2,PLK1,AURKB,KIF23,TUBGCP3,TPX2,KIF4A,RACGAP1,CEP97,MZT1
7_Summary	Hallmark Gene Sets	M5926	HALLMARK MYC TARGETS V1	-30.8123	-28.13	65/200	328,708,790,890,991,1017,1503,1964,1965,2091,2806,2935,3015,3068,3178,3184,3251,3329,3608,3615,3837,3939,4085,4171,4173,4174,4175,4176,4830,4869,5036,5111,5901,5902,5984,6059,6187,6240,6418,6426,6427,6428,6432,6434,6626,6627,6632,6950,7027,7298,7398,7913,8318,8761,9184,9188,10054,10236,10492,10528,10576,10856,10971,11137,51491	APEX1,C1QBP,CAD,CCNA2,CDC20,CDK2,CTPS1,EIF1AX,EIF2S1,FBL,GOT2,GSPT1,H2AFZ,HDGF,HNRNPA1,HNRNPD,HPRT1,HSPD1,ILF2,IMPDH2,KPNB1,LDHA,MAD2L1,MCM2,MCM4,MCM5,MCM6,MCM7,NME1,NPM1,PA2G4,PCNA,RAN,RANBP1,RFC4,ABCE1,RPS2,RRM1,SET,SRSF1,SRSF2,SRSF3,SRSF7,TRA2B,SNRPA,SNRPA1,SNRPD1,TCP1,TFDP1,TYMS,USP1,DEK,CDC45,PABPC4,BUB3,DDX21,UBA2,HNRNPR,SYNCRIP,NOP56,CCT2,RUVBL2,YWHAQ,PWP1,NOP16
7_Member	Hallmark Gene Sets	M5926	HALLMARK MYC TARGETS V1	-30.8123	-28.13	65/200	328,708,790,890,991,1017,1503,1964,1965,2091,2806,2935,3015,3068,3178,3184,3251,3329,3608,3615,3837,3939,4085,4171,4173,4174,4175,4176,4830,4869,5036,5111,5901,5902,5984,6059,6187,6240,6418,6426,6427,6428,6432,6434,6626,6627,6632,6950,7027,7298,7398,7913,8318,8761,9184,9188,10054,10236,10492,10528,10576,10856,10971,11137,51491	APEX1,C1QBP,CAD,CCNA2,CDC20,CDK2,CTPS1,EIF1AX,EIF2S1,FBL,GOT2,GSPT1,H2AFZ,HDGF,HNRNPA1,HNRNPD,HPRT1,HSPD1,ILF2,IMPDH2,KPNB1,LDHA,MAD2L1,MCM2,MCM4,MCM5,MCM6,MCM7,NME1,NPM1,PA2G4,PCNA,RAN,RANBP1,RFC4,ABCE1,RPS2,RRM1,SET,SRSF1,SRSF2,SRSF3,SRSF7,TRA2B,SNRPA,SNRPA1,SNRPD1,TCP1,TFDP1,TYMS,USP1,DEK,CDC45,PABPC4,BUB3,DDX21,UBA2,HNRNPR,SYNCRIP,NOP56,CCT2,RUVBL2,YWHAQ,PWP1,NOP16
8_Summary	Reactome Gene Sets	R-HSA-453279	Mitotic G1-G1/S phases	-30.0851	-27.425	55/145	595,890,891,983,990,993,1017,1021,1029,1031,1032,1163,1719,1869,1870,4171,4172,4173,4174,4175,4176,4331,4605,4998,5111,5422,5426,5427,5557,5558,5700,5702,5705,5708,5717,5933,6117,6119,6241,7027,7153,7298,8317,8318,9134,10000,10926,23594,23649,26271,55388,81620,84515,132660,286826,1763,2237,3978,5424,5885,5983,5984,5985,8243,9126,9837,10714,23198,51659,64785,84296,113130,157570,51053,580,641,672,7…	CCND1,CCNA2,CCNB1,CDK1,CDC6,CDC25A,CDK2,CDK6,CDKN2A,CDKN2C,CDKN2D,CKS1B,DHFR,E2F1,E2F2,MCM2,MCM3,MCM4,MCM5,MCM6,MCM7,MNAT1,MYBL2,ORC1,PCNA,POLA1,POLE,POLE2,PRIM1,PRIM2,PSMC1,PSMC3,PSMC5,PSMD2,PSMD11,RBL1,RPA1,RPA3,RRM2,TFDP1,TOP2A,TYMS,CDC7,CDC45,CCNE2,AKT3,DBF4,ORC6,POLA2,FBXO5,MCM10,CDT1,MCM8,LIN54,LIN9,DNA2,FEN1,LIG1,POLD1,RAD21,RFC3,RFC4,RFC5,SMC1A,SMC3,GINS1,POLD3,PSME4,GINS2,GINS3,GINS4,CDC…
8_Member	Reactome Gene Sets	R-HSA-453279	Mitotic G1-G1/S phases	-30.0851	-27.425	55/145	595,890,891,983,990,993,1017,1021,1029,1031,1032,1163,1719,1869,1870,4171,4172,4173,4174,4175,4176,4331,4605,4998,5111,5422,5426,5427,5557,5558,5700,5702,5705,5708,5717,5933,6117,6119,6241,7027,7153,7298,8317,8318,9134,10000,10926,23594,23649,26271,55388,81620,84515,132660,286826	CCND1,CCNA2,CCNB1,CDK1,CDC6,CDC25A,CDK2,CDK6,CDKN2A,CDKN2C,CDKN2D,CKS1B,DHFR,E2F1,E2F2,MCM2,MCM3,MCM4,MCM5,MCM6,MCM7,MNAT1,MYBL2,ORC1,PCNA,POLA1,POLE,POLE2,PRIM1,PRIM2,PSMC1,PSMC3,PSMC5,PSMD2,PSMD11,RBL1,RPA1,RPA3,RRM2,TFDP1,TOP2A,TYMS,CDC7,CDC45,CCNE2,AKT3,DBF4,ORC6,POLA2,FBXO5,MCM10,CDT1,MCM8,LIN54,LIN9
8_Member	Reactome Gene Sets	R-HSA-69242	S Phase	-28.3878	-25.75	51/132	595,890,990,993,1017,1163,1763,2237,3978,4171,4172,4173,4174,4175,4176,4331,4998,5111,5422,5424,5426,5427,5557,5558,5700,5702,5705,5708,5717,5885,5983,5984,5985,6117,6119,8243,8318,9126,9134,9837,10714,23198,23594,23649,51659,64785,81620,84296,84515,113130,157570	CCND1,CCNA2,CDC6,CDC25A,CDK2,CKS1B,DNA2,FEN1,LIG1,MCM2,MCM3,MCM4,MCM5,MCM6,MCM7,MNAT1,ORC1,PCNA,POLA1,POLD1,POLE,POLE2,PRIM1,PRIM2,PSMC1,PSMC3,PSMC5,PSMD2,PSMD11,RAD21,RFC3,RFC4,RFC5,RPA1,RPA3,SMC1A,CDC45,SMC3,CCNE2,GINS1,POLD3,PSME4,ORC6,POLA2,GINS2,GINS3,CDT1,GINS4,MCM8,CDCA5,ESCO2
8_Member	Reactome Gene Sets	R-HSA-69306	DNA Replication	-28.3278	-25.71	47/111	890,990,1017,1763,1869,1870,2237,3978,4171,4172,4173,4174,4175,4176,4998,5111,5422,5424,5426,5427,5557,5558,5700,5702,5705,5708,5717,5983,5984,5985,6117,6119,8317,8318,9837,10714,10926,23198,23594,23649,51053,51659,55388,64785,81620,84296,84515	CCNA2,CDC6,CDK2,DNA2,E2F1,E2F2,FEN1,LIG1,MCM2,MCM3,MCM4,MCM5,MCM6,MCM7,ORC1,PCNA,POLA1,POLD1,POLE,POLE2,PRIM1,PRIM2,PSMC1,PSMC3,PSMC5,PSMD2,PSMD11,RFC3,RFC4,RFC5,RPA1,RPA3,CDC7,CDC45,GINS1,POLD3,DBF4,PSME4,ORC6,POLA2,GMNN,GINS2,MCM10,GINS3,CDT1,GINS4,MCM8
8_Member	Reactome Gene Sets	R-HSA-69620	Cell Cycle Checkpoints	-25.8478	-23.296	60/204	580,641,672,701,890,891,983,990,991,993,995,1017,1763,3014,4085,4171,4172,4173,4174,4175,4176,4361,4998,5700,5702,5705,5708,5717,5932,5983,5984,5985,6117,6119,7468,7533,7534,8317,8318,9088,9133,9134,9156,9184,10926,10971,11065,11073,23198,23594,25906,51512,55388,57060,63967,80010,83990,84126,84515,116028	BARD1,BLM,BRCA1,BUB1B,CCNA2,CCNB1,CDK1,CDC6,CDC20,CDC25A,CDC25C,CDK2,DNA2,H2AFX,MAD2L1,MCM2,MCM3,MCM4,MCM5,MCM6,MCM7,MRE11,ORC1,PSMC1,PSMC3,PSMC5,PSMD2,PSMD11,RBBP8,RFC3,RFC4,RFC5,RPA1,RPA3,NSD2,YWHAH,YWHAZ,CDC7,CDC45,PKMYT1,CCNB2,CCNE2,EXO1,BUB3,DBF4,YWHAQ,UBE2C,TOPBP1,PSME4,ORC6,ANAPC15,GTSE1,MCM10,PCBP4,CLSPN,RMI1,BRIP1,ATRIP,MCM8,RMI2
8_Member	Reactome Gene Sets	R-HSA-69206	G1/S Transition	-24.2947	-21.768	45/121	595,890,891,983,990,993,1017,1163,1719,1869,4171,4172,4173,4174,4175,4176,4331,4998,5111,5422,5426,5427,5557,5558,5700,5702,5705,5708,5717,6117,6119,6241,7027,7298,8317,8318,9134,10000,10926,23594,23649,26271,55388,81620,84515	CCND1,CCNA2,CCNB1,CDK1,CDC6,CDC25A,CDK2,CKS1B,DHFR,E2F1,MCM2,MCM3,MCM4,MCM5,MCM6,MCM7,MNAT1,ORC1,PCNA,POLA1,POLE,POLE2,PRIM1,PRIM2,PSMC1,PSMC3,PSMC5,PSMD2,PSMD11,RPA1,RPA3,RRM2,TFDP1,TYMS,CDC7,CDC45,CCNE2,AKT3,DBF4,ORC6,POLA2,FBXO5,MCM10,CDT1,MCM8
8_Member	Reactome Gene Sets	R-HSA-69239	Synthesis of DNA	-23.5314	-21.021	41/103	890,990,1017,1763,2237,3978,4171,4172,4173,4174,4175,4176,4998,5111,5422,5424,5426,5427,5557,5558,5700,5702,5705,5708,5717,5983,5984,5985,6117,6119,8318,9837,10714,23198,23594,23649,51659,64785,81620,84296,84515	CCNA2,CDC6,CDK2,DNA2,FEN1,LIG1,MCM2,MCM3,MCM4,MCM5,MCM6,MCM7,ORC1,PCNA,POLA1,POLD1,POLE,POLE2,PRIM1,PRIM2,PSMC1,PSMC3,PSMC5,PSMD2,PSMD11,RFC3,RFC4,RFC5,RPA1,RPA3,CDC45,GINS1,POLD3,PSME4,ORC6,POLA2,GINS2,GINS3,CDT1,GINS4,MCM8
8_Member	Reactome Gene Sets	R-HSA-68962	Activation of the pre-replicative complex	-22.9537	-20.459	24/32	990,1017,4171,4172,4173,4174,4175,4176,4998,5422,5426,5427,5557,5558,6117,6119,8317,8318,10926,23594,23649,55388,81620,84515	CDC6,CDK2,MCM2,MCM3,MCM4,MCM5,MCM6,MCM7,ORC1,POLA1,POLE,POLE2,PRIM1,PRIM2,RPA1,RPA3,CDC7,CDC45,DBF4,ORC6,POLA2,MCM10,CDT1,MCM8
8_Member	Reactome Gene Sets	R-HSA-69481	G2/M Checkpoints	-22.2316	-19.744	51/172	580,641,672,891,983,990,993,995,1017,1763,3014,4171,4172,4173,4174,4175,4176,4361,4998,5700,5702,5705,5708,5717,5932,5983,5984,5985,6117,6119,7468,7533,7534,8317,8318,9088,9133,9156,10926,10971,11073,23198,23594,51512,55388,63967,80010,83990,84126,84515,116028	BARD1,BLM,BRCA1,CCNB1,CDK1,CDC6,CDC25A,CDC25C,CDK2,DNA2,H2AFX,MCM2,MCM3,MCM4,MCM5,MCM6,MCM7,MRE11,ORC1,PSMC1,PSMC3,PSMC5,PSMD2,PSMD11,RBBP8,RFC3,RFC4,RFC5,RPA1,RPA3,NSD2,YWHAH,YWHAZ,CDC7,CDC45,PKMYT1,CCNB2,EXO1,DBF4,YWHAQ,TOPBP1,PSME4,ORC6,GTSE1,MCM10,CLSPN,RMI1,BRIP1,ATRIP,MCM8,RMI2
8_Member	GO Biological Processes	GO:0006270	DNA replication initiation	-21.1885	-18.751	25/39	990,1017,4171,4172,4173,4174,4175,4176,4998,5422,5426,5427,5557,5558,8317,8318,9134,11073,23594,23649,51659,55388,81620,84296,90381	CDC6,CDK2,MCM2,MCM3,MCM4,MCM5,MCM6,MCM7,ORC1,POLA1,POLE,POLE2,PRIM1,PRIM2,CDC7,CDC45,CCNE2,TOPBP1,ORC6,POLA2,GINS2,MCM10,CDT1,GINS4,TICRR
8_Member	Reactome Gene Sets	R-HSA-176187	Activation of ATR in response to replication stress	-20.5458	-18.127	24/37	990,993,995,1017,4171,4172,4173,4174,4175,4176,4998,5983,5984,5985,6117,6119,8317,8318,10926,23594,55388,63967,84126,84515	CDC6,CDC25A,CDC25C,CDK2,MCM2,MCM3,MCM4,MCM5,MCM6,MCM7,ORC1,RFC3,RFC4,RFC5,RPA1,RPA3,CDC7,CDC45,DBF4,ORC6,MCM10,CLSPN,ATRIP,MCM8
8_Member	Reactome Gene Sets	R-HSA-68874	M/G1 Transition	-18.1167	-15.774	33/88	990,1017,1869,1870,4171,4172,4173,4174,4175,4176,4998,5422,5426,5427,5557,5558,5700,5702,5705,5708,5717,6117,6119,8317,8318,10926,23198,23594,23649,51053,55388,81620,84515	CDC6,CDK2,E2F1,E2F2,MCM2,MCM3,MCM4,MCM5,MCM6,MCM7,ORC1,POLA1,POLE,POLE2,PRIM1,PRIM2,PSMC1,PSMC3,PSMC5,PSMD2,PSMD11,RPA1,RPA3,CDC7,CDC45,DBF4,PSME4,ORC6,POLA2,GMNN,MCM10,CDT1,MCM8
8_Member	Reactome Gene Sets	R-HSA-69002	DNA Replication Pre-Initiation	-18.1167	-15.774	33/88	990,1017,1869,1870,4171,4172,4173,4174,4175,4176,4998,5422,5426,5427,5557,5558,5700,5702,5705,5708,5717,6117,6119,8317,8318,10926,23198,23594,23649,51053,55388,81620,84515	CDC6,CDK2,E2F1,E2F2,MCM2,MCM3,MCM4,MCM5,MCM6,MCM7,ORC1,POLA1,POLE,POLE2,PRIM1,PRIM2,PSMC1,PSMC3,PSMC5,PSMD2,PSMD11,RPA1,RPA3,CDC7,CDC45,DBF4,PSME4,ORC6,POLA2,GMNN,MCM10,CDT1,MCM8
8_Member	Reactome Gene Sets	R-HSA-69304	Regulation of DNA replication	-10.2112	-8.259	23/79	890,990,1017,1869,1870,4171,4172,4173,4174,4175,4176,4998,5700,5702,5705,5708,5717,23198,23594,51053,55388,81620,84515	CCNA2,CDC6,CDK2,E2F1,E2F2,MCM2,MCM3,MCM4,MCM5,MCM6,MCM7,ORC1,PSMC1,PSMC3,PSMC5,PSMD2,PSMD11,PSME4,ORC6,GMNN,MCM10,CDT1,MCM8
8_Member	Reactome Gene Sets	R-HSA-69300	Removal of licensing factors from origins	-8.9186	-7.057	21/76	890,990,1017,4171,4172,4173,4174,4175,4176,4998,5700,5702,5705,5708,5717,23198,23594,51053,55388,81620,84515	CCNA2,CDC6,CDK2,MCM2,MCM3,MCM4,MCM5,MCM6,MCM7,ORC1,PSMC1,PSMC3,PSMC5,PSMD2,PSMD11,PSME4,ORC6,GMNN,MCM10,CDT1,MCM8
8_Member	Reactome Gene Sets	R-HSA-68867	Assembly of the pre-replicative complex	-8.68646	-6.844	20/71	990,1869,1870,4171,4172,4173,4174,4175,4176,4998,5700,5702,5705,5708,5717,23198,23594,51053,81620,84515	CDC6,E2F1,E2F2,MCM2,MCM3,MCM4,MCM5,MCM6,MCM7,ORC1,PSMC1,PSMC3,PSMC5,PSMD2,PSMD11,PSME4,ORC6,GMNN,CDT1,MCM8
8_Member	Reactome Gene Sets	R-HSA-68949	Orc1 removal from chromatin	-7.55892	-5.809	19/74	890,990,1017,4171,4172,4173,4174,4175,4176,4998,5700,5702,5705,5708,5717,23198,23594,81620,84515	CCNA2,CDC6,CDK2,MCM2,MCM3,MCM4,MCM5,MCM6,MCM7,ORC1,PSMC1,PSMC3,PSMC5,PSMD2,PSMD11,PSME4,ORC6,CDT1,MCM8
8_Member	Reactome Gene Sets	R-HSA-69052	Switching of origins to a post-replicative state	-7.55892	-5.809	19/74	890,990,1017,4171,4172,4173,4174,4175,4176,4998,5700,5702,5705,5708,5717,23198,23594,81620,84515	CCNA2,CDC6,CDK2,MCM2,MCM3,MCM4,MCM5,MCM6,MCM7,ORC1,PSMC1,PSMC3,PSMC5,PSMD2,PSMD11,PSME4,ORC6,CDT1,MCM8
8_Member	Reactome Gene Sets	R-HSA-68827	CDT1 association with the CDC6:ORC:origin complex	-3.70567	-2.371	22981	990,4998,5700,5702,5705,5708,5717,23198,23594,51053,81620,84515	CDC6,ORC1,PSMC1,PSMC3,PSMC5,PSMD2,PSMD11,PSME4,ORC6,GMNN,CDT1,MCM8
9_Summary	GO Biological Processes	GO:0071103	DNA conformation change	-28.9135	-26.265	75/283	641,891,983,1029,1058,1663,1763,2491,2852,3005,3014,3070,3146,3148,3149,3159,4171,4172,4173,4174,4175,4176,4361,4678,4869,5888,6418,7153,8091,8208,8318,8438,8520,9401,9557,9837,9918,10036,10051,10541,10592,10856,11339,23198,23270,23310,23397,23421,25788,29781,51203,51659,54069,54892,55166,55355,55723,55839,57082,64105,64151,64946,79019,79172,79682,79711,80152,83990,84083,84296,91687,113130,201161…	BLM,CCNB1,CDK1,CDKN2A,CENPA,DDX11,DNA2,CENPI,GPER1,H1F0,H2AFX,HELLS,HMGB1,HMGB2,HMGB3,HMGA1,MCM2,MCM3,MCM4,MCM5,MCM6,MCM7,MRE11,NASP,NPM1,RAD51,SET,TOP2A,HMGA2,CHAF1B,CDC45,RAD54L,HAT1,RECQL4,CHD1L,GINS1,NCAPD2,CHAF1A,SMC4,ANP32B,SMC2,RUVBL2,OIP5,PSME4,TSPYL4,NCAPD3,NCAPH,ITGB3BP,RAD54B,NCAPH2,NUSAP1,GINS2,MIS18A,NCAPG2,CENPQ,HJURP,ASF1B,CENPN,KNL1,CENPK,NCAPG,CENPH,CENPM,CENPO,CENPU,IPO4,CENPT,B…
9_Member	GO Biological Processes	GO:0071103	DNA conformation change	-28.9135	-26.265	75/283	641,891,983,1029,1058,1663,1763,2491,2852,3005,3014,3070,3146,3148,3149,3159,4171,4172,4173,4174,4175,4176,4361,4678,4869,5888,6418,7153,8091,8208,8318,8438,8520,9401,9557,9837,9918,10036,10051,10541,10592,10856,11339,23198,23270,23310,23397,23421,25788,29781,51203,51659,54069,54892,55166,55355,55723,55839,57082,64105,64151,64946,79019,79172,79682,79711,80152,83990,84083,84296,91687,113130,201161…	BLM,CCNB1,CDK1,CDKN2A,CENPA,DDX11,DNA2,CENPI,GPER1,H1F0,H2AFX,HELLS,HMGB1,HMGB2,HMGB3,HMGA1,MCM2,MCM3,MCM4,MCM5,MCM6,MCM7,MRE11,NASP,NPM1,RAD51,SET,TOP2A,HMGA2,CHAF1B,CDC45,RAD54L,HAT1,RECQL4,CHD1L,GINS1,NCAPD2,CHAF1A,SMC4,ANP32B,SMC2,RUVBL2,OIP5,PSME4,TSPYL4,NCAPD3,NCAPH,ITGB3BP,RAD54B,NCAPH2,NUSAP1,GINS2,MIS18A,NCAPG2,CENPQ,HJURP,ASF1B,CENPN,KNL1,CENPK,NCAPG,CENPH,CENPM,CENPO,CENPU,IPO4,CENPT,B…
9_Member	Reactome Gene Sets	R-HSA-73886	Chromosome Maintenance	-24.2698	-21.751	43/110	1058,1736,1763,2237,2491,3014,3015,3978,4869,5111,5422,5424,5426,5427,5557,5558,5983,5984,5985,6117,6119,10714,10856,11339,23421,23649,54069,55135,55166,55355,55839,57082,64105,64946,65057,79019,79172,79682,80152,91687,94239,387103,401541	CENPA,DKC1,DNA2,FEN1,CENPI,H2AFX,H2AFZ,LIG1,NPM1,PCNA,POLA1,POLD1,POLE,POLE2,PRIM1,PRIM2,RFC3,RFC4,RFC5,RPA1,RPA3,POLD3,RUVBL2,OIP5,ITGB3BP,POLA2,MIS18A,WRAP53,CENPQ,HJURP,CENPN,KNL1,CENPK,CENPH,ACD,CENPM,CENPO,CENPU,CENPT,CENPL,H2AFV,CENPW,CENPP
9_Member	GO Biological Processes	GO:0006323	DNA packaging	-19.8995	-17.494	52/199	891,983,1029,1058,2491,2852,3005,3014,3070,3148,3159,4171,4678,4869,6418,7153,8091,8208,8520,9918,10036,10051,10541,10592,11339,23198,23270,23310,23397,23421,29781,51203,54069,54892,55166,55355,55723,55839,57082,64105,64151,64946,79019,79172,79682,79711,80152,91687,113130,201161,387103,401541	CCNB1,CDK1,CDKN2A,CENPA,CENPI,GPER1,H1F0,H2AFX,HELLS,HMGB2,HMGA1,MCM2,NASP,NPM1,SET,TOP2A,HMGA2,CHAF1B,HAT1,NCAPD2,CHAF1A,SMC4,ANP32B,SMC2,OIP5,PSME4,TSPYL4,NCAPD3,NCAPH,ITGB3BP,NCAPH2,NUSAP1,MIS18A,NCAPG2,CENPQ,HJURP,ASF1B,CENPN,KNL1,CENPK,NCAPG,CENPH,CENPM,CENPO,CENPU,IPO4,CENPT,CENPL,CDCA5,CENPV,CENPW,CENPP
9_Member	GO Biological Processes	GO:0071824	protein-DNA complex subunit organization	-16.5638	-14.281	55/259	1058,1062,1063,2491,3005,3014,3070,3146,3148,3159,4171,4331,4678,4869,5700,5702,5705,5888,6117,6119,6418,7516,7517,8208,8289,8318,8520,9557,10036,10541,11198,11339,23198,23270,23421,54069,55166,55355,55723,55839,57082,64105,64425,64946,79003,79019,79172,79682,79711,80152,81611,91687,201161,387103,401541	CENPA,CENPE,CENPF,CENPI,H1F0,H2AFX,HELLS,HMGB1,HMGB2,HMGA1,MCM2,MNAT1,NASP,NPM1,PSMC1,PSMC3,PSMC5,RAD51,RPA1,RPA3,SET,XRCC2,XRCC3,CHAF1B,ARID1A,CDC45,HAT1,CHD1L,CHAF1A,ANP32B,SUPT16H,OIP5,PSME4,TSPYL4,ITGB3BP,MIS18A,CENPQ,HJURP,ASF1B,CENPN,KNL1,CENPK,POLR1E,CENPH,MIS12,CENPM,CENPO,CENPU,IPO4,CENPT,ANP32E,CENPL,CENPV,CENPW,CENPP
9_Member	GO Biological Processes	GO:0065004	protein-DNA complex assembly	-15.39	-13.143	50/232	1058,1062,1063,2491,3005,3014,3070,3146,3148,4171,4331,4678,4869,5700,5702,5705,5888,6117,6119,6418,7516,7517,8208,8318,8520,9557,10036,10541,11339,23270,23421,54069,55166,55355,55723,55839,57082,64105,64425,64946,79003,79019,79172,79682,79711,80152,91687,201161,387103,401541	CENPA,CENPE,CENPF,CENPI,H1F0,H2AFX,HELLS,HMGB1,HMGB2,MCM2,MNAT1,NASP,NPM1,PSMC1,PSMC3,PSMC5,RAD51,RPA1,RPA3,SET,XRCC2,XRCC3,CHAF1B,CDC45,HAT1,CHD1L,CHAF1A,ANP32B,OIP5,TSPYL4,ITGB3BP,MIS18A,CENPQ,HJURP,ASF1B,CENPN,KNL1,CENPK,POLR1E,CENPH,MIS12,CENPM,CENPO,CENPU,IPO4,CENPT,CENPL,CENPV,CENPW,CENPP
9_Member	GO Biological Processes	GO:0034508	centromere complex assembly	-15.365	-13.127	24/54	1058,1062,1063,2491,3070,4869,11339,23421,54069,55166,55355,55839,57082,64105,64946,79003,79019,79172,79682,80152,91687,201161,387103,401541	CENPA,CENPE,CENPF,CENPI,HELLS,NPM1,OIP5,ITGB3BP,MIS18A,CENPQ,HJURP,CENPN,KNL1,CENPK,CENPH,MIS12,CENPM,CENPO,CENPU,CENPT,CENPL,CENPV,CENPW,CENPP
9_Member	GO Biological Processes	GO:0034724	DNA replication-independent nucleosome organization	-15.365	-13.127	24/54	1058,2491,4678,4869,8520,11198,11339,23421,54069,55166,55355,55723,55839,57082,64105,64946,79019,79172,79682,79711,80152,91687,387103,401541	CENPA,CENPI,NASP,NPM1,HAT1,SUPT16H,OIP5,ITGB3BP,MIS18A,CENPQ,HJURP,ASF1B,CENPN,KNL1,CENPK,CENPH,CENPM,CENPO,CENPU,IPO4,CENPT,CENPL,CENPW,CENPP
9_Member	GO Biological Processes	GO:0006336	DNA replication-independent nucleosome assembly	-14.4718	-12.278	23/53	1058,2491,4678,4869,8520,11339,23421,54069,55166,55355,55723,55839,57082,64105,64946,79019,79172,79682,79711,80152,91687,387103,401541	CENPA,CENPI,NASP,NPM1,HAT1,OIP5,ITGB3BP,MIS18A,CENPQ,HJURP,ASF1B,CENPN,KNL1,CENPK,CENPH,CENPM,CENPO,CENPU,IPO4,CENPT,CENPL,CENPW,CENPP
9_Member	GO Biological Processes	GO:0031055	chromatin remodeling at centromere	-13.8137	-11.656	21/46	1058,2491,3070,4869,11339,23421,54069,55166,55355,55839,57082,64105,64946,79019,79172,79682,80152,91687,201161,387103,401541	CENPA,CENPI,HELLS,NPM1,OIP5,ITGB3BP,MIS18A,CENPQ,HJURP,CENPN,KNL1,CENPK,CENPH,CENPM,CENPO,CENPU,CENPT,CENPL,CENPV,CENPW,CENPP
9_Member	GO Biological Processes	GO:0043486	histone exchange	-13.3806	-11.24	22/53	1058,2491,4678,4869,11339,23198,23421,54069,55166,55355,55839,57082,64105,64946,79019,79172,79682,80152,81611,91687,387103,401541	CENPA,CENPI,NASP,NPM1,OIP5,PSME4,ITGB3BP,MIS18A,CENPQ,HJURP,CENPN,KNL1,CENPK,CENPH,CENPM,CENPO,CENPU,CENPT,ANP32E,CENPL,CENPW,CENPP
9_Member	GO Biological Processes	GO:0006333	chromatin assembly or disassembly	-13.0854	-10.955	41/186	1029,1058,2491,3005,3014,3070,3148,3159,4171,4678,4869,6418,8091,8208,8289,8479,8520,10036,10541,11198,11339,23270,23421,54069,55166,55355,55723,55839,57082,64105,64946,79019,79172,79682,79711,79723,80152,91687,201161,387103,401541	CDKN2A,CENPA,CENPI,H1F0,H2AFX,HELLS,HMGB2,HMGA1,MCM2,NASP,NPM1,SET,HMGA2,CHAF1B,ARID1A,HIRIP3,HAT1,CHAF1A,ANP32B,SUPT16H,OIP5,TSPYL4,ITGB3BP,MIS18A,CENPQ,HJURP,ASF1B,CENPN,KNL1,CENPK,CENPH,CENPM,CENPO,CENPU,IPO4,SUV39H2,CENPT,CENPL,CENPV,CENPW,CENPP
9_Member	GO Biological Processes	GO:0043044	ATP-dependent chromatin remodeling	-12.6757	-10.558	25/74	60,86,1058,2491,4678,4869,8289,11339,23198,23421,54069,55166,55355,55839,57082,64105,64946,79019,79172,79682,80152,81611,91687,387103,401541	ACTB,ACTL6A,CENPA,CENPI,NASP,NPM1,ARID1A,OIP5,PSME4,ITGB3BP,MIS18A,CENPQ,HJURP,CENPN,KNL1,CENPK,CENPH,CENPM,CENPO,CENPU,CENPT,ANP32E,CENPL,CENPW,CENPP
9_Member	GO Biological Processes	GO:0061641	CENP-A containing chromatin organization	-12.4679	-10.369	19/42	1058,2491,4869,11339,23421,54069,55166,55355,55839,57082,64105,64946,79019,79172,79682,80152,91687,387103,401541	CENPA,CENPI,NPM1,OIP5,ITGB3BP,MIS18A,CENPQ,HJURP,CENPN,KNL1,CENPK,CENPH,CENPM,CENPO,CENPU,CENPT,CENPL,CENPW,CENPP
9_Member	GO Biological Processes	GO:0034080	CENP-A containing nucleosome assembly	-12.4679	-10.369	19/42	1058,2491,4869,11339,23421,54069,55166,55355,55839,57082,64105,64946,79019,79172,79682,80152,91687,387103,401541	CENPA,CENPI,NPM1,OIP5,ITGB3BP,MIS18A,CENPQ,HJURP,CENPN,KNL1,CENPK,CENPH,CENPM,CENPO,CENPU,CENPT,CENPL,CENPW,CENPP
9_Member	GO Biological Processes	GO:0031497	chromatin assembly	-12.4633	-10.368	37/161	1029,1058,2491,3005,3014,3070,3148,3159,4171,4678,4869,6418,8091,8208,8520,10036,10541,11339,23270,23421,54069,55166,55355,55723,55839,57082,64105,64946,79019,79172,79682,79711,80152,91687,201161,387103,401541	CDKN2A,CENPA,CENPI,H1F0,H2AFX,HELLS,HMGB2,HMGA1,MCM2,NASP,NPM1,SET,HMGA2,CHAF1B,HAT1,CHAF1A,ANP32B,OIP5,TSPYL4,ITGB3BP,MIS18A,CENPQ,HJURP,ASF1B,CENPN,KNL1,CENPK,CENPH,CENPM,CENPO,CENPU,IPO4,CENPT,CENPL,CENPV,CENPW,CENPP
9_Member	GO Biological Processes	GO:0034728	nucleosome organization	-11.6164	-9.567	37/171	1058,2491,3005,3014,3148,3159,4171,4678,4869,6418,8208,8289,8520,10036,10541,11198,11339,23198,23270,23421,54069,55166,55355,55723,55839,57082,64105,64946,79019,79172,79682,79711,80152,81611,91687,387103,401541	CENPA,CENPI,H1F0,H2AFX,HMGB2,HMGA1,MCM2,NASP,NPM1,SET,CHAF1B,ARID1A,HAT1,CHAF1A,ANP32B,SUPT16H,OIP5,PSME4,TSPYL4,ITGB3BP,MIS18A,CENPQ,HJURP,ASF1B,CENPN,KNL1,CENPK,CENPH,CENPM,CENPO,CENPU,IPO4,CENPT,ANP32E,CENPL,CENPW,CENPP
9_Member	GO Biological Processes	GO:0006338	chromatin remodeling	-11.169	-9.141	35/160	60,86,1029,1058,2491,3070,3159,4678,4869,7913,8091,8289,9557,10856,11177,11339,23198,23421,54069,55166,55355,55839,57082,64105,64946,79019,79172,79682,79723,80152,81611,91687,201161,387103,401541	ACTB,ACTL6A,CDKN2A,CENPA,CENPI,HELLS,HMGA1,NASP,NPM1,DEK,HMGA2,ARID1A,CHD1L,RUVBL2,BAZ1A,OIP5,PSME4,ITGB3BP,MIS18A,CENPQ,HJURP,CENPN,KNL1,CENPK,CENPH,CENPM,CENPO,CENPU,SUV39H2,CENPT,ANP32E,CENPL,CENPV,CENPW,CENPP
9_Member	GO Biological Processes	GO:0006325	chromatin organization	-10.5207	-8.549	90/747	60,86,672,675,891,983,1017,1029,1058,1663,1786,2091,2146,2491,3005,3014,3015,3070,3148,3150,3159,4171,4288,4654,4678,4869,5933,6418,6790,6839,6996,7443,7468,7913,8089,8091,8110,8208,8289,8318,8479,8520,8536,8986,9212,9252,9557,9575,9734,10036,10541,10856,11137,11177,11198,11339,23198,23270,23421,26053,26147,27000,28989,29028,29128,54069,55166,55183,55355,55723,55839,57082,64105,64710,64946,79019,…	ACTB,ACTL6A,BRCA1,BRCA2,CCNB1,CDK1,CDK2,CDKN2A,CENPA,DDX11,DNMT1,FBL,EZH2,CENPI,H1F0,H2AFX,H2AFZ,HELLS,HMGB2,HMGN1,HMGA1,MCM2,MKI67,MYOD1,NASP,NPM1,RBL1,SET,AURKA,SUV39H1,TDG,VRK1,NSD2,DEK,YEATS4,HMGA2,DPF3,CHAF1B,ARID1A,CDC45,HIRIP3,HAT1,CAMK1,RPS6KA4,AURKB,RPS6KA5,CHD1L,CLOCK,HDAC9,CHAF1A,ANP32B,RUVBL2,PWP1,BAZ1A,SUPT16H,OIP5,PSME4,TSPYL4,ITGB3BP,AUTS2,PHF19,DNAJC2,NTMT1,ATAD2,UHRF1,MIS18A,CENP…
9_Member	GO Biological Processes	GO:0006334	nucleosome assembly	-10.4608	-8.491	32/144	1058,2491,3005,3014,3148,4171,4678,4869,6418,8208,8520,10036,10541,11339,23270,23421,54069,55166,55355,55723,55839,57082,64105,64946,79019,79172,79682,79711,80152,91687,387103,401541	CENPA,CENPI,H1F0,H2AFX,HMGB2,MCM2,NASP,NPM1,SET,CHAF1B,HAT1,CHAF1A,ANP32B,OIP5,TSPYL4,ITGB3BP,MIS18A,CENPQ,HJURP,ASF1B,CENPN,KNL1,CENPK,CENPH,CENPM,CENPO,CENPU,IPO4,CENPT,CENPL,CENPW,CENPP
9_Member	Reactome Gene Sets	R-HSA-606279	Deposition of new CENPA-containing nucleosomes at the centromere	-10.1222	-8.174	22/73	1058,2491,3014,3015,4869,11339,23421,54069,55166,55355,55839,57082,64105,64946,79019,79172,79682,80152,91687,94239,387103,401541	CENPA,CENPI,H2AFX,H2AFZ,NPM1,OIP5,ITGB3BP,MIS18A,CENPQ,HJURP,CENPN,KNL1,CENPK,CENPH,CENPM,CENPO,CENPU,CENPT,CENPL,H2AFV,CENPW,CENPP
9_Member	Reactome Gene Sets	R-HSA-774815	Nucleosome assembly	-10.1222	-8.174	22/73	1058,2491,3014,3015,4869,11339,23421,54069,55166,55355,55839,57082,64105,64946,79019,79172,79682,80152,91687,94239,387103,401541	CENPA,CENPI,H2AFX,H2AFZ,NPM1,OIP5,ITGB3BP,MIS18A,CENPQ,HJURP,CENPN,KNL1,CENPK,CENPH,CENPM,CENPO,CENPU,CENPT,CENPL,H2AFV,CENPW,CENPP
10_Summary	Reactome Gene Sets	R-HSA-69190	DNA strand elongation	-28.334	-25.71	27/32	1763,2237,3978,4171,4172,4173,4174,4175,4176,5111,5422,5424,5557,5558,5983,5984,5985,6117,6119,8318,9837,10714,23649,51659,64785,84296,84515,5426,5427,10535,675,2067,4361,5888,7153,7516,7517,25788,348654,1736,10856,55135,328,10038,3014,3015,65057,94239,6996,7374,2956,4436,9156,7398,51514,56852,3159,8091,9401,10721,55247,3146,9100,9768,978,3059,3251,3615,4830,4860,5898,6749,7298,10189,11130,23204,…	DNA2,FEN1,LIG1,MCM2,MCM3,MCM4,MCM5,MCM6,MCM7,PCNA,POLA1,POLD1,PRIM1,PRIM2,RFC3,RFC4,RFC5,RPA1,RPA3,CDC45,GINS1,POLD3,POLA2,GINS2,GINS3,GINS4,MCM8,POLE,POLE2,RNASEH2A,BRCA2,ERCC1,MRE11,RAD51,TOP2A,XRCC2,XRCC3,RAD54B,GEN1,DKC1,RUVBL2,WRAP53,APEX1,PARP2,H2AFX,H2AFZ,ACD,H2AFV,TDG,UNG,MSH6,MSH2,EXO1,USP1,DTL,RAD18,HMGA1,HMGA2,RECQL4,POLQ,NEIL3,HMGB1,USP10,PCLAF,CDA,HCLS1,HPRT1,IMPDH2,NME1,PNP,RALA,SSR…
10_Member	Reactome Gene Sets	R-HSA-69190	DNA strand elongation	-28.334	-25.71	27/32	1763,2237,3978,4171,4172,4173,4174,4175,4176,5111,5422,5424,5557,5558,5983,5984,5985,6117,6119,8318,9837,10714,23649,51659,64785,84296,84515	DNA2,FEN1,LIG1,MCM2,MCM3,MCM4,MCM5,MCM6,MCM7,PCNA,POLA1,POLD1,PRIM1,PRIM2,RFC3,RFC4,RFC5,RPA1,RPA3,CDC45,GINS1,POLD3,POLA2,GINS2,GINS3,GINS4,MCM8
10_Member	KEGG Pathway	hsa03030	DNA replication	-20.9757	-18.551	24/36	1763,2237,3978,4171,4172,4173,4174,4175,4176,5111,5422,5424,5426,5427,5557,5558,5983,5984,5985,6117,6119,10535,10714,23649	DNA2,FEN1,LIG1,MCM2,MCM3,MCM4,MCM5,MCM6,MCM7,PCNA,POLA1,POLD1,POLE,POLE2,PRIM1,PRIM2,RFC3,RFC4,RFC5,RPA1,RPA3,RNASEH2A,POLD3,POLA2
10_Member	KEGG Pathway	ko03030	DNA replication	-20.9757	-18.551	24/36	1763,2237,3978,4171,4172,4173,4174,4175,4176,5111,5422,5424,5426,5427,5557,5558,5983,5984,5985,6117,6119,10535,10714,23649	DNA2,FEN1,LIG1,MCM2,MCM3,MCM4,MCM5,MCM6,MCM7,PCNA,POLA1,POLD1,POLE,POLE2,PRIM1,PRIM2,RFC3,RFC4,RFC5,RPA1,RPA3,RNASEH2A,POLD3,POLA2
10_Member	GO Biological Processes	GO:0006312	mitotic recombination	-17.5337	-15.217	25/50	675,1763,2067,2237,4361,5111,5422,5424,5426,5427,5557,5558,5888,5983,5984,5985,6117,6119,7153,7516,7517,10714,23649,25788,348654	BRCA2,DNA2,ERCC1,FEN1,MRE11,PCNA,POLA1,POLD1,POLE,POLE2,PRIM1,PRIM2,RAD51,RFC3,RFC4,RFC5,RPA1,RPA3,TOP2A,XRCC2,XRCC3,POLD3,POLA2,RAD54B,GEN1
10_Member	Reactome Gene Sets	R-HSA-180786	Extension of Telomeres	-17.1437	-14.832	20/31	1736,1763,2237,3978,5111,5422,5424,5426,5427,5557,5558,5983,5984,5985,6117,6119,10714,10856,23649,55135	DKC1,DNA2,FEN1,LIG1,PCNA,POLA1,POLD1,POLE,POLE2,PRIM1,PRIM2,RFC3,RFC4,RFC5,RPA1,RPA3,POLD3,RUVBL2,POLA2,WRAP53
10_Member	Reactome Gene Sets	R-HSA-174417	Telomere C-strand (Lagging Strand) Synthesis	-15.7054	-13.45	17/24	1763,2237,3978,5111,5422,5424,5426,5427,5557,5558,5983,5984,5985,6117,6119,10714,23649	DNA2,FEN1,LIG1,PCNA,POLA1,POLD1,POLE,POLE2,PRIM1,PRIM2,RFC3,RFC4,RFC5,RPA1,RPA3,POLD3,POLA2
10_Member	GO Biological Processes	GO:0000722	telomere maintenance via recombination	-15.3288	-13.095	20/36	675,1763,2067,2237,5111,5422,5424,5426,5427,5557,5558,5888,5983,5984,5985,6117,6119,7517,10714,23649	BRCA2,DNA2,ERCC1,FEN1,PCNA,POLA1,POLD1,POLE,POLE2,PRIM1,PRIM2,RAD51,RFC3,RFC4,RFC5,RPA1,RPA3,XRCC3,POLD3,POLA2
10_Member	Reactome Gene Sets	R-HSA-69186	Lagging Strand Synthesis	-14.521	-12.323	15/20	1763,2237,3978,5111,5422,5424,5557,5558,5983,5984,5985,6117,6119,10714,23649	DNA2,FEN1,LIG1,PCNA,POLA1,POLD1,PRIM1,PRIM2,RFC3,RFC4,RFC5,RPA1,RPA3,POLD3,POLA2
10_Member	Reactome Gene Sets	R-HSA-69183	Processive synthesis on the lagging strand	-12.2806	-10.2	42339	1763,2237,3978,5111,5422,5424,5557,5558,6117,6119,10714,23649	DNA2,FEN1,LIG1,PCNA,POLA1,POLD1,PRIM1,PRIM2,RPA1,RPA3,POLD3,POLA2
10_Member	Reactome Gene Sets	R-HSA-110373	Resolution of AP sites via the multiple-nucleotide patch replacement pathway	-11.2961	-9.263	14/24	328,2237,3978,5111,5424,5426,5427,5983,5984,5985,6117,6119,10038,10714	APEX1,FEN1,LIG1,PCNA,POLD1,POLE,POLE2,RFC3,RFC4,RFC5,RPA1,RPA3,PARP2,POLD3
10_Member	Reactome Gene Sets	R-HSA-69166	Removal of the Flap Intermediate	-11.1364	-9.113	41944	1763,2237,5111,5422,5424,5557,5558,6117,6119,10714,23649	DNA2,FEN1,PCNA,POLA1,POLD1,PRIM1,PRIM2,RPA1,RPA3,POLD3,POLA2
10_Member	Reactome Gene Sets	R-HSA-5651801	PCNA-Dependent Long Patch Base Excision Repair	-10.9902	-8.972	13/21	328,2237,3978,5111,5424,5426,5427,5983,5984,5985,6117,6119,10714	APEX1,FEN1,LIG1,PCNA,POLD1,POLE,POLE2,RFC3,RFC4,RFC5,RPA1,RPA3,POLD3
10_Member	Reactome Gene Sets	R-HSA-157579	Telomere Maintenance	-10.5563	-8.581	24/83	1736,1763,2237,3014,3015,3978,5111,5422,5424,5426,5427,5557,5558,5983,5984,5985,6117,6119,10714,10856,23649,55135,65057,94239	DKC1,DNA2,FEN1,H2AFX,H2AFZ,LIG1,PCNA,POLA1,POLD1,POLE,POLE2,PRIM1,PRIM2,RFC3,RFC4,RFC5,RPA1,RPA3,POLD3,RUVBL2,POLA2,WRAP53,ACD,H2AFV
10_Member	Reactome Gene Sets	R-HSA-73933	Resolution of Abasic Sites (AP sites)	-10.2281	-8.274	16/37	328,2237,3978,5111,5424,5426,5427,5983,5984,5985,6117,6119,6996,7374,10038,10714	APEX1,FEN1,LIG1,PCNA,POLD1,POLE,POLE2,RFC3,RFC4,RFC5,RPA1,RPA3,TDG,UNG,PARP2,POLD3
10_Member	Reactome Gene Sets	R-HSA-73884	Base Excision Repair	-10.2281	-8.274	16/37	328,2237,3978,5111,5424,5426,5427,5983,5984,5985,6117,6119,6996,7374,10038,10714	APEX1,FEN1,LIG1,PCNA,POLD1,POLE,POLE2,RFC3,RFC4,RFC5,RPA1,RPA3,TDG,UNG,PARP2,POLD3
10_Member	Reactome Gene Sets	R-HSA-69109	Leading Strand Synthesis	-9.4794	-7.584	41913	5111,5422,5424,5557,5558,5983,5984,5985,10714,23649	PCNA,POLA1,POLD1,PRIM1,PRIM2,RFC3,RFC4,RFC5,POLD3,POLA2
10_Member	Reactome Gene Sets	R-HSA-69091	Polymerase switching	-9.4794	-7.584	41913	5111,5422,5424,5557,5558,5983,5984,5985,10714,23649	PCNA,POLA1,POLD1,PRIM1,PRIM2,RFC3,RFC4,RFC5,POLD3,POLA2
10_Member	Reactome Gene Sets	R-HSA-174411	Polymerase switching on the C-strand of the telomere	-9.4794	-7.584	41913	5111,5422,5424,5557,5558,5983,5984,5985,10714,23649	PCNA,POLA1,POLD1,PRIM1,PRIM2,RFC3,RFC4,RFC5,POLD3,POLA2
10_Member	KEGG Pathway	ko03430	Mismatch repair	-8.99643	-7.131	45261	2956,3978,4436,5111,5424,5983,5984,5985,6117,6119,9156,10714	MSH6,LIG1,MSH2,PCNA,POLD1,RFC3,RFC4,RFC5,RPA1,RPA3,EXO1,POLD3
10_Member	KEGG Pathway	hsa03430	Mismatch repair	-8.99643	-7.131	45261	2956,3978,4436,5111,5424,5983,5984,5985,6117,6119,9156,10714	MSH6,LIG1,MSH2,PCNA,POLD1,RFC3,RFC4,RFC5,RPA1,RPA3,EXO1,POLD3
10_Member	Reactome Gene Sets	R-HSA-110314	Recognition of DNA damage by PCNA-containing replication complex	-8.43372	-6.609	13/30	5111,5424,5426,5427,5983,5984,5985,6117,6119,7398,10714,51514,56852	PCNA,POLD1,POLE,POLE2,RFC3,RFC4,RFC5,RPA1,RPA3,USP1,POLD3,DTL,RAD18
10_Member	GO Biological Processes	GO:0006284	base-excision repair	-8.41113	-6.588	15/41	328,1763,3159,3978,5424,5426,6117,6119,6996,7374,8091,9401,10038,10721,55247	APEX1,DNA2,HMGA1,LIG1,POLD1,POLE,RPA1,RPA3,TDG,UNG,HMGA2,RECQL4,PARP2,POLQ,NEIL3
10_Member	KEGG Pathway	ko03410	Base excision repair	-7.82472	-6.054	13/33	328,2237,3146,3978,5111,5424,5426,5427,6996,7374,10038,10714,55247	APEX1,FEN1,HMGB1,LIG1,PCNA,POLD1,POLE,POLE2,TDG,UNG,PARP2,POLD3,NEIL3
10_Member	KEGG Pathway	hsa03410	Base excision repair	-7.82472	-6.054	13/33	328,2237,3146,3978,5111,5424,5426,5427,6996,7374,10038,10714,55247	APEX1,FEN1,HMGB1,LIG1,PCNA,POLD1,POLE,POLE2,TDG,UNG,PARP2,POLD3,NEIL3
10_Member	Reactome Gene Sets	R-HSA-174414	Processive synthesis on the C-strand of the telomere	-7.75774	-5.993	43047	1763,2237,3978,5111,5424,6117,6119,10714	DNA2,FEN1,LIG1,PCNA,POLD1,RPA1,RPA3,POLD3
10_Member	Reactome Gene Sets	R-HSA-5358565	Mismatch repair (MMR) directed by MSH2:MSH6 (MutSalpha)	-7.58554	-5.83	42248	2956,3978,4436,5111,5424,6117,6119,9156,10714	MSH6,LIG1,MSH2,PCNA,POLD1,RPA1,RPA3,EXO1,POLD3
10_Member	Reactome Gene Sets	R-HSA-5696397	Gap-filling DNA repair synthesis and ligation in GG-NER	-7.30609	-5.575	45962	3978,5111,5424,5426,5427,5983,5984,5985,6117,6119,10714	LIG1,PCNA,POLD1,POLE,POLE2,RFC3,RFC4,RFC5,RPA1,RPA3,POLD3
10_Member	GO Biological Processes	GO:0006298	mismatch repair	-7.29015	-5.562	13/36	2067,2956,3146,3978,4436,5111,5424,6117,6119,6996,9156,10535,10714	ERCC1,MSH6,HMGB1,LIG1,MSH2,PCNA,POLD1,RPA1,RPA3,TDG,EXO1,RNASEH2A,POLD3
10_Member	Reactome Gene Sets	R-HSA-5358508	Mismatch Repair	-7.24953	-5.525	42614	2956,3978,4436,5111,5424,6117,6119,9156,10714	MSH6,LIG1,MSH2,PCNA,POLD1,RPA1,RPA3,EXO1,POLD3
10_Member	Reactome Gene Sets	R-HSA-73893	DNA Damage Bypass	-7.07552	-5.367	15/50	5111,5424,5426,5427,5983,5984,5985,6117,6119,7398,9100,9768,10714,51514,56852	PCNA,POLD1,POLE,POLE2,RFC3,RFC4,RFC5,RPA1,RPA3,USP1,USP10,PCLAF,POLD3,DTL,RAD18
10_Member	Hallmark Gene Sets	M5898	HALLMARK DNA REPAIR	-6.88011	-5.191	27/150	978,2067,2237,3059,3251,3615,3978,4830,4860,5111,5422,5424,5557,5888,5898,5983,5984,5985,6119,6749,7298,10189,10714,11130,23204,23649,25874	CDA,ERCC1,FEN1,HCLS1,HPRT1,IMPDH2,LIG1,NME1,PNP,PCNA,POLA1,POLD1,PRIM1,RAD51,RALA,RFC3,RFC4,RFC5,RPA3,SSRP1,TYMS,ALYREF,POLD3,ZWINT,ARL6IP1,POLA2,MPC2
10_Member	Reactome Gene Sets	R-HSA-174437	Removal of the Flap Intermediate from the C-strand	-6.65554	-5.002	43015	1763,2237,5111,5424,6117,6119,10714	DNA2,FEN1,PCNA,POLD1,RPA1,RPA3,POLD3
10_Member	Reactome Gene Sets	R-HSA-5656169	Termination of translesion DNA synthesis	-6.64716	-4.996	12754	5111,5424,5426,5427,5983,5984,5985,6117,6119,9100,9768,10714	PCNA,POLD1,POLE,POLE2,RFC3,RFC4,RFC5,RPA1,RPA3,USP10,PCLAF,POLD3
10_Member	GO Biological Processes	GO:0006301	postreplication repair	-6.58578	-4.94	15/54	672,4436,5111,5424,5427,5983,5984,5985,6117,6119,9100,9768,10714,51514,56852	BRCA1,MSH2,PCNA,POLD1,POLE2,RFC3,RFC4,RFC5,RPA1,RPA3,USP10,PCLAF,POLD3,DTL,RAD18
10_Member	Reactome Gene Sets	R-HSA-5696400	Dual Incision in GG-NER	-6.52595	-4.89	13/41	2067,5111,5424,5426,5427,5983,5984,5985,6117,6119,9557,10038,10714	ERCC1,PCNA,POLD1,POLE,POLE2,RFC3,RFC4,RFC5,RPA1,RPA3,CHD1L,PARP2,POLD3
10_Member	GO Biological Processes	GO:0006297	nucleotide-excision repair, DNA gap filling	-6.41956	-4.792	45566	3978,5111,5424,5426,5983,5984,5985,6117,6119,10714	LIG1,PCNA,POLD1,POLE,RFC3,RFC4,RFC5,RPA1,RPA3,POLD3
10_Member	GO Biological Processes	GO:0042769	DNA damage response, detection of DNA damage	-6.33568	-4.717	13485	5111,5424,5983,5984,5985,6117,6119,7398,8091,10714,51514,56852	PCNA,POLD1,RFC3,RFC4,RFC5,RPA1,RPA3,USP1,HMGA2,POLD3,DTL,RAD18
10_Member	Reactome Gene Sets	R-HSA-5358606	Mismatch repair (MMR) directed by MSH2:MSH3 (MutSbeta)	-6.25767	-4.644	42217	3978,4436,5111,5424,6117,6119,9156,10714	LIG1,MSH2,PCNA,POLD1,RPA1,RPA3,EXO1,POLD3
10_Member	Reactome Gene Sets	R-HSA-5696399	Global Genome Nucleotide Excision Repair (GG-NER)	-5.84936	-4.275	18/85	60,86,2067,3978,4331,5111,5424,5426,5427,5983,5984,5985,6117,6119,8533,9557,10038,10714	ACTB,ACTL6A,ERCC1,LIG1,MNAT1,PCNA,POLD1,POLE,POLE2,RFC3,RFC4,RFC5,RPA1,RPA3,COPS3,CHD1L,PARP2,POLD3
10_Member	KEGG Pathway	ko03420	Nucleotide excision repair	-5.76513	-4.203	13/47	2067,3978,4331,5111,5424,5426,5427,5983,5984,5985,6117,6119,10714	ERCC1,LIG1,MNAT1,PCNA,POLD1,POLE,POLE2,RFC3,RFC4,RFC5,RPA1,RPA3,POLD3
10_Member	KEGG Pathway	hsa03420	Nucleotide excision repair	-5.76513	-4.203	13/47	2067,3978,4331,5111,5424,5426,5427,5983,5984,5985,6117,6119,10714	ERCC1,LIG1,MNAT1,PCNA,POLD1,POLE,POLE2,RFC3,RFC4,RFC5,RPA1,RPA3,POLD3
10_Member	Reactome Gene Sets	R-HSA-110313	Translesion synthesis by Y family DNA polymerases bypasses lesions on DNA template	-5.65283	-4.102	15311	5111,5424,5426,5427,5983,5984,5985,6117,6119,9100,9768,10714	PCNA,POLD1,POLE,POLE2,RFC3,RFC4,RFC5,RPA1,RPA3,USP10,PCLAF,POLD3
10_Member	GO Biological Processes	GO:0019985	translesion synthesis	-5.53012	-3.99	15676	5111,5424,5427,5983,5984,5985,6117,6119,9100,9768,10714,51514	PCNA,POLD1,POLE2,RFC3,RFC4,RFC5,RPA1,RPA3,USP10,PCLAF,POLD3,DTL
10_Member	Reactome Gene Sets	R-HSA-5696398	Nucleotide Excision Repair	-4.65396	-3.2	19/112	60,86,2067,3150,3978,4331,5111,5424,5426,5427,5983,5984,5985,6117,6119,8533,9557,10038,10714	ACTB,ACTL6A,ERCC1,HMGN1,LIG1,MNAT1,PCNA,POLD1,POLE,POLE2,RFC3,RFC4,RFC5,RPA1,RPA3,COPS3,CHD1L,PARP2,POLD3
10_Member	GO Biological Processes	GO:0006296	nucleotide-excision repair, DNA incision, 5'-to lesion	-4.47034	-3.042	13789	2067,5111,5424,5983,5984,5985,6117,6119,9557,10714	ERCC1,PCNA,POLD1,RFC3,RFC4,RFC5,RPA1,RPA3,CHD1L,POLD3
10_Member	GO Biological Processes	GO:0006289	nucleotide-excision repair	-4.43427	-3.01	19/116	675,2067,3150,3978,4331,5111,5424,5426,5932,5983,5984,5985,6117,6119,8533,9557,10714,55247,220064	BRCA2,ERCC1,HMGN1,LIG1,MNAT1,PCNA,POLD1,POLE,RBBP8,RFC3,RFC4,RFC5,RPA1,RPA3,COPS3,CHD1L,POLD3,NEIL3,ORAOV1
10_Member	Reactome Gene Sets	R-HSA-6781827	Transcription-Coupled Nucleotide Excision Repair (TC-NER)	-4.3837	-2.964	15/79	2067,3150,3978,4331,5111,5424,5426,5427,5983,5984,5985,6117,6119,8533,10714	ERCC1,HMGN1,LIG1,MNAT1,PCNA,POLD1,POLE,POLE2,RFC3,RFC4,RFC5,RPA1,RPA3,COPS3,POLD3
10_Member	GO Biological Processes	GO:0033683	nucleotide-excision repair, DNA incision	-4.25505	-2.849	14519	2067,5111,5424,5983,5984,5985,6117,6119,9557,10714	ERCC1,PCNA,POLD1,RFC3,RFC4,RFC5,RPA1,RPA3,CHD1L,POLD3
10_Member	Reactome Gene Sets	R-HSA-6782210	Gap-filling DNA repair synthesis and ligation in TC-NER	-4.12041	-2.733	13/65	3150,3978,4331,5111,5424,5426,5427,5983,5984,5985,6117,6119,10714	HMGN1,LIG1,MNAT1,PCNA,POLD1,POLE,POLE2,RFC3,RFC4,RFC5,RPA1,RPA3,POLD3
10_Member	GO Biological Processes	GO:0042276	error-prone translesion synthesis	-4.06853	-2.689	44013	5111,5427,5983,5984,5985,6117,6119	PCNA,POLE2,RFC3,RFC4,RFC5,RPA1,RPA3
10_Member	Reactome Gene Sets	R-HSA-6782135	Dual incision in TC-NER	-4.04853	-2.672	13/66	2067,3150,4331,5111,5424,5426,5427,5983,5984,5985,6117,6119,10714	ERCC1,HMGN1,MNAT1,PCNA,POLD1,POLE,POLE2,RFC3,RFC4,RFC5,RPA1,RPA3,POLD3
10_Member	Reactome Gene Sets	R-HSA-110312	Translesion synthesis by REV1	-3.74376	-2.402	42522	5111,5983,5984,5985,6117,6119	PCNA,RFC3,RFC4,RFC5,RPA1,RPA3
10_Member	GO Biological Processes	GO:0006283	transcription-coupled nucleotide-excision repair	-3.5868	-2.264	13/73	2067,3150,3978,4331,5111,5424,5983,5984,5985,6117,6119,8533,10714	ERCC1,HMGN1,LIG1,MNAT1,PCNA,POLD1,RFC3,RFC4,RFC5,RPA1,RPA3,COPS3,POLD3
10_Member	Reactome Gene Sets	R-HSA-5655862	Translesion synthesis by POLK	-3.57647	-2.255	42887	5111,5983,5984,5985,6117,6119	PCNA,RFC3,RFC4,RFC5,RPA1,RPA3
10_Member	Reactome Gene Sets	R-HSA-5656121	Translesion synthesis by POLI	-3.57647	-2.255	42887	5111,5983,5984,5985,6117,6119	PCNA,RFC3,RFC4,RFC5,RPA1,RPA3
10_Member	Reactome Gene Sets	R-HSA-110320	Translesion Synthesis by POLH	-3.27902	-1.989	43617	5111,5983,5984,5985,6117,6119	PCNA,RFC3,RFC4,RFC5,RPA1,RPA3
10_Member	GO Biological Processes	GO:0070987	error-free translesion synthesis	-3.27902	-1.989	43617	5111,5983,5984,5985,6117,6119	PCNA,RFC3,RFC4,RFC5,RPA1,RPA3
11_Summary	GO Biological Processes	GO:0051052	regulation of DNA metabolic process	-27.4369	-24.839	85/375	306,328,641,672,675,983,990,1017,1663,1736,1763,1786,2067,2305,2852,2956,3014,3146,3178,3184,3265,3320,3575,4361,4436,4751,4771,4869,5111,5216,5888,5983,5984,5985,6950,7153,7292,7374,7398,7468,7517,7913,8091,8243,8317,8914,9126,9212,9401,10189,10576,10635,10721,23560,27000,27063,27101,29128,51053,54069,54962,54984,55010,55135,55183,55704,56034,57695,63922,63979,64710,65057,79075,79733,79915,80174…	ANXA3,APEX1,BLM,BRCA1,BRCA2,CDK1,CDC6,CDK2,DDX11,DKC1,DNA2,DNMT1,ERCC1,FOXM1,GPER1,MSH6,H2AFX,HMGB1,HNRNPA1,HNRNPD,HRAS,HSP90AA1,IL7R,MRE11,MSH2,NEK2,NF2,NPM1,PCNA,PFN1,RAD51,RFC3,RFC4,RFC5,TCP1,TOP2A,TNFSF4,UNG,USP1,NSD2,XRCC3,DEK,HMGA2,SMC1A,CDC7,TIMELESS,SMC3,AURKB,RECQL4,ALYREF,CCT2,RAD51AP1,POLQ,GTPBP4,DNAJC2,ANKRD1,CACYBP,UHRF1,GMNN,MIS18A,TIPIN,PINX1,PARPBP,WRAP53,RIF1,CCDC88A,PDGFC,USP37,…
11_Member	GO Biological Processes	GO:0051052	regulation of DNA metabolic process	-27.4369	-24.839	85/375	306,328,641,672,675,983,990,1017,1663,1736,1763,1786,2067,2305,2852,2956,3014,3146,3178,3184,3265,3320,3575,4361,4436,4751,4771,4869,5111,5216,5888,5983,5984,5985,6950,7153,7292,7374,7398,7468,7517,7913,8091,8243,8317,8914,9126,9212,9401,10189,10576,10635,10721,23560,27000,27063,27101,29128,51053,54069,54962,54984,55010,55135,55183,55704,56034,57695,63922,63979,64710,65057,79075,79733,79915,80174…	ANXA3,APEX1,BLM,BRCA1,BRCA2,CDK1,CDC6,CDK2,DDX11,DKC1,DNA2,DNMT1,ERCC1,FOXM1,GPER1,MSH6,H2AFX,HMGB1,HNRNPA1,HNRNPD,HRAS,HSP90AA1,IL7R,MRE11,MSH2,NEK2,NF2,NPM1,PCNA,PFN1,RAD51,RFC3,RFC4,RFC5,TCP1,TOP2A,TNFSF4,UNG,USP1,NSD2,XRCC3,DEK,HMGA2,SMC1A,CDC7,TIMELESS,SMC3,AURKB,RECQL4,ALYREF,CCT2,RAD51AP1,POLQ,GTPBP4,DNAJC2,ANKRD1,CACYBP,UHRF1,GMNN,MIS18A,TIPIN,PINX1,PARPBP,WRAP53,RIF1,CCDC88A,PDGFC,USP37,…
11_Member	GO Biological Processes	GO:0071897	DNA biosynthetic process	-21.7206	-19.262	55/204	580,641,672,675,1032,1063,1736,1763,3178,3184,3320,3978,4361,4751,5111,5422,5424,5426,5427,5558,5888,5932,5983,5984,5985,6117,6119,6950,7083,7298,7516,7517,9100,9156,9212,9768,10576,10635,10714,10721,23649,27000,27063,51514,54433,54984,55135,63922,65057,79075,80010,83990,116028,140609,286826	BARD1,BLM,BRCA1,BRCA2,CDKN2D,CENPF,DKC1,DNA2,HNRNPA1,HNRNPD,HSP90AA1,LIG1,MRE11,NEK2,PCNA,POLA1,POLD1,POLE,POLE2,PRIM2,RAD51,RBBP8,RFC3,RFC4,RFC5,RPA1,RPA3,TCP1,TK1,TYMS,XRCC2,XRCC3,USP10,EXO1,AURKB,PCLAF,CCT2,RAD51AP1,POLD3,POLQ,POLA2,DNAJC2,ANKRD1,DTL,GAR1,PINX1,WRAP53,CHTF18,ACD,DSCC1,RMI1,BRIP1,RMI2,NEK7,LIN9
11_Member	GO Biological Processes	GO:0000723	telomere maintenance	-17.6331	-15.306	42/148	328,641,675,1736,1763,2067,2237,3178,3184,3320,4361,4751,5111,5422,5424,5426,5427,5557,5558,5591,5888,5983,5984,5985,6117,6119,6950,7517,9134,9156,9212,9401,10576,10714,23649,54433,54984,55135,55183,64858,65057,140609	APEX1,BLM,BRCA2,DKC1,DNA2,ERCC1,FEN1,HNRNPA1,HNRNPD,HSP90AA1,MRE11,NEK2,PCNA,POLA1,POLD1,POLE,POLE2,PRIM1,PRIM2,PRKDC,RAD51,RFC3,RFC4,RFC5,RPA1,RPA3,TCP1,XRCC3,CCNE2,EXO1,AURKB,RECQL4,CCT2,POLD3,POLA2,GAR1,PINX1,WRAP53,RIF1,DCLRE1B,ACD,NEK7
11_Member	GO Biological Processes	GO:0032200	telomere organization	-16.9497	-14.648	43/161	328,641,675,1736,1763,2067,2237,3178,3184,3320,4361,4751,5111,5422,5424,5426,5427,5557,5558,5591,5888,5983,5984,5985,6117,6119,6950,7517,9134,9156,9212,9401,10576,10714,23649,54433,54984,55135,55183,64858,65057,84444,140609	APEX1,BLM,BRCA2,DKC1,DNA2,ERCC1,FEN1,HNRNPA1,HNRNPD,HSP90AA1,MRE11,NEK2,PCNA,POLA1,POLD1,POLE,POLE2,PRIM1,PRIM2,PRKDC,RAD51,RFC3,RFC4,RFC5,RPA1,RPA3,TCP1,XRCC3,CCNE2,EXO1,AURKB,RECQL4,CCT2,POLD3,POLA2,GAR1,PINX1,WRAP53,RIF1,DCLRE1B,ACD,DOT1L,NEK7
11_Member	GO Biological Processes	GO:0051054	positive regulation of DNA metabolic process	-16.8528	-14.561	49/207	306,328,672,983,1017,1663,1736,1763,1786,2067,2305,2956,3014,3146,3178,3184,3265,3320,4361,4751,5111,5216,5888,5983,5984,5985,6950,7153,7292,7374,7468,8317,8914,9212,10576,27101,55135,55183,56034,63922,65057,79075,79733,79915,80174,84250,118460,140609,144455	ANXA3,APEX1,BRCA1,CDK1,CDK2,DDX11,DKC1,DNA2,DNMT1,ERCC1,FOXM1,MSH6,H2AFX,HMGB1,HNRNPA1,HNRNPD,HRAS,HSP90AA1,MRE11,NEK2,PCNA,PFN1,RAD51,RFC3,RFC4,RFC5,TCP1,TOP2A,TNFSF4,UNG,NSD2,CDC7,TIMELESS,AURKB,CCT2,CACYBP,WRAP53,RIF1,PDGFC,CHTF18,ACD,DSCC1,E2F8,ATAD5,DBF4B,SLF1,EXOSC6,NEK7,E2F7
11_Member	GO Biological Processes	GO:0060249	anatomical structure homeostasis	-8.94543	-7.082	53/371	60,71,328,580,596,641,675,793,1073,1436,1736,1763,1901,2067,2237,3178,3184,3320,4361,4751,5111,5422,5424,5426,5427,5557,5558,5591,5880,5888,5983,5984,5985,6117,6119,6950,7517,9134,9156,9212,9401,10000,10576,10714,11151,23649,54433,54984,55135,55183,64858,65057,140609	ACTB,ACTG1,APEX1,BARD1,BCL2,BLM,BRCA2,CALB1,CFL2,CSF1R,DKC1,DNA2,S1PR1,ERCC1,FEN1,HNRNPA1,HNRNPD,HSP90AA1,MRE11,NEK2,PCNA,POLA1,POLD1,POLE,POLE2,PRIM1,PRIM2,PRKDC,RAC2,RAD51,RFC3,RFC4,RFC5,RPA1,RPA3,TCP1,XRCC3,CCNE2,EXO1,AURKB,RECQL4,AKT3,CCT2,POLD3,CORO1A,POLA2,GAR1,PINX1,WRAP53,RIF1,DCLRE1B,ACD,NEK7
12_Summary	Hallmark Gene Sets	M5893	HALLMARK MITOTIC SPINDLE	-27.23	-24.642	61/200	81,332,357,396,675,699,983,1062,1063,1778,1794,1894,2317,3619,3799,3832,3835,4001,4627,4739,4751,5116,5347,5829,5921,6790,7153,7272,7430,8243,9055,9126,9133,9181,9493,9585,9700,9735,9787,9793,10051,10276,10403,10426,11004,11135,22974,24137,25777,26271,29127,50628,50650,51199,51203,54443,55704,55722,55835,56992,163786	ACTN4,BIRC5,SHROOM2,ARHGDIA,BRCA2,BUB1,CDK1,CENPE,CENPF,DYNC1H1,DOCK2,ECT2,FLNB,INCENP,KIF5B,KIF11,KIF22,LMNB1,MYH9,NEDD9,NEK2,PCNT,PLK1,PXN,RASA1,AURKA,TOP2A,TTK,EZR,SMC1A,PRC1,SMC3,CCNB2,ARHGEF2,KIF23,KIF20B,ESPL1,KNTC1,DLGAP5,CKAP5,SMC4,NET1,NDC80,TUBGCP3,KIF2C,CDC42EP1,TPX2,KIF4A,SUN2,FBXO5,RACGAP1,GEMIN4,ARHGEF3,NIN,NUSAP1,ANLN,CCDC88A,CEP72,CENPJ,KIF15,SASS6
12_Member	Hallmark Gene Sets	M5893	HALLMARK MITOTIC SPINDLE	-27.23	-24.642	61/200	81,332,357,396,675,699,983,1062,1063,1778,1794,1894,2317,3619,3799,3832,3835,4001,4627,4739,4751,5116,5347,5829,5921,6790,7153,7272,7430,8243,9055,9126,9133,9181,9493,9585,9700,9735,9787,9793,10051,10276,10403,10426,11004,11135,22974,24137,25777,26271,29127,50628,50650,51199,51203,54443,55704,55722,55835,56992,163786	ACTN4,BIRC5,SHROOM2,ARHGDIA,BRCA2,BUB1,CDK1,CENPE,CENPF,DYNC1H1,DOCK2,ECT2,FLNB,INCENP,KIF5B,KIF11,KIF22,LMNB1,MYH9,NEDD9,NEK2,PCNT,PLK1,PXN,RASA1,AURKA,TOP2A,TTK,EZR,SMC1A,PRC1,SMC3,CCNB2,ARHGEF2,KIF23,KIF20B,ESPL1,KNTC1,DLGAP5,CKAP5,SMC4,NET1,NDC80,TUBGCP3,KIF2C,CDC42EP1,TPX2,KIF4A,SUN2,FBXO5,RACGAP1,GEMIN4,ARHGEF3,NIN,NUSAP1,ANLN,CCDC88A,CEP72,CENPJ,KIF15,SASS6
13_Summary	KEGG Pathway	hsa04110	Cell cycle	-25.7732	-23.238	47/124	595,699,701,890,891,983,990,991,993,995,1017,1021,1029,1031,1032,1869,1870,4085,4171,4172,4173,4174,4175,4176,4998,5111,5347,5591,5885,5933,7027,7272,7533,7534,8243,8317,8318,9088,9126,9133,9134,9184,9232,9700,10926,10971,23594,805,5501,6790,26271,27330,151648	CCND1,BUB1,BUB1B,CCNA2,CCNB1,CDK1,CDC6,CDC20,CDC25A,CDC25C,CDK2,CDK6,CDKN2A,CDKN2C,CDKN2D,E2F1,E2F2,MAD2L1,MCM2,MCM3,MCM4,MCM5,MCM6,MCM7,ORC1,PCNA,PLK1,PRKDC,RAD21,RBL1,TFDP1,TTK,YWHAH,YWHAZ,SMC1A,CDC7,CDC45,PKMYT1,SMC3,CCNB2,CCNE2,BUB3,PTTG1,ESPL1,DBF4,YWHAQ,ORC6,CALM2,PPP1CC,AURKA,FBXO5,RPS6KA6,SGO1
13_Member	KEGG Pathway	hsa04110	Cell cycle	-25.7732	-23.238	47/124	595,699,701,890,891,983,990,991,993,995,1017,1021,1029,1031,1032,1869,1870,4085,4171,4172,4173,4174,4175,4176,4998,5111,5347,5591,5885,5933,7027,7272,7533,7534,8243,8317,8318,9088,9126,9133,9134,9184,9232,9700,10926,10971,23594	CCND1,BUB1,BUB1B,CCNA2,CCNB1,CDK1,CDC6,CDC20,CDC25A,CDC25C,CDK2,CDK6,CDKN2A,CDKN2C,CDKN2D,E2F1,E2F2,MAD2L1,MCM2,MCM3,MCM4,MCM5,MCM6,MCM7,ORC1,PCNA,PLK1,PRKDC,RAD21,RBL1,TFDP1,TTK,YWHAH,YWHAZ,SMC1A,CDC7,CDC45,PKMYT1,SMC3,CCNB2,CCNE2,BUB3,PTTG1,ESPL1,DBF4,YWHAQ,ORC6
13_Member	KEGG Pathway	ko04110	Cell cycle	-25.7732	-23.238	47/124	595,699,701,890,891,983,990,991,993,995,1017,1021,1029,1031,1032,1869,1870,4085,4171,4172,4173,4174,4175,4176,4998,5111,5347,5591,5885,5933,7027,7272,7533,7534,8243,8317,8318,9088,9126,9133,9134,9184,9232,9700,10926,10971,23594	CCND1,BUB1,BUB1B,CCNA2,CCNB1,CDK1,CDC6,CDC20,CDC25A,CDC25C,CDK2,CDK6,CDKN2A,CDKN2C,CDKN2D,E2F1,E2F2,MAD2L1,MCM2,MCM3,MCM4,MCM5,MCM6,MCM7,ORC1,PCNA,PLK1,PRKDC,RAD21,RBL1,TFDP1,TTK,YWHAH,YWHAZ,SMC1A,CDC7,CDC45,PKMYT1,SMC3,CCNB2,CCNE2,BUB3,PTTG1,ESPL1,DBF4,YWHAQ,ORC6
13_Member	KEGG Pathway	hsa04114	Oocyte meiosis	-6.79734	-5.123	24/124	699,805,891,983,991,995,1017,4085,5347,5501,6790,7533,7534,8243,9088,9126,9133,9134,9232,9700,10971,26271,27330,151648	BUB1,CALM2,CCNB1,CDK1,CDC20,CDC25C,CDK2,MAD2L1,PLK1,PPP1CC,AURKA,YWHAH,YWHAZ,SMC1A,PKMYT1,SMC3,CCNB2,CCNE2,PTTG1,ESPL1,YWHAQ,FBXO5,RPS6KA6,SGO1
13_Member	KEGG Pathway	ko04114	Oocyte meiosis	-6.79734	-5.123	24/124	699,805,891,983,991,995,1017,4085,5347,5501,6790,7533,7534,8243,9088,9126,9133,9134,9232,9700,10971,26271,27330,151648	BUB1,CALM2,CCNB1,CDK1,CDC20,CDC25C,CDK2,MAD2L1,PLK1,PPP1CC,AURKA,YWHAH,YWHAZ,SMC1A,PKMYT1,SMC3,CCNB2,CCNE2,PTTG1,ESPL1,YWHAQ,FBXO5,RPS6KA6,SGO1
14_Summary	GO Biological Processes	GO:0044839	cell cycle G2/M phase transition	-21.7996	-19.334	60/240	595,641,890,891,983,993,995,1017,1021,1063,1778,2305,3161,3320,4331,4361,4751,4869,5116,5347,5569,5700,5702,5705,5708,5717,6790,7283,8091,8317,9088,9133,9793,9833,9928,10383,10733,10763,11073,11113,22974,22995,23198,23354,51512,54801,55142,55215,55722,55835,63967,79866,80174,84131,84930,90381,93323,121441,203068,220064,1869,4605,10376,10381,10426,84617,84790,132660,286826,79598,84902,347240,857,1…	CCND1,BLM,CCNA2,CCNB1,CDK1,CDC25A,CDC25C,CDK2,CDK6,CENPF,DYNC1H1,FOXM1,HMMR,HSP90AA1,MNAT1,MRE11,NEK2,NPM1,PCNT,PLK1,PKIA,PSMC1,PSMC3,PSMC5,PSMD2,PSMD11,AURKA,TUBG1,HMGA2,CDC7,PKMYT1,CCNB2,CKAP5,MELK,KIF14,TUBB4B,PLK4,NES,TOPBP1,CIT,TPX2,CEP152,PSME4,HAUS5,GTSE1,HAUS6,HAUS2,FANCI,CEP72,CENPJ,CLSPN,BORA,DBF4B,CEP78,MASTL,TICRR,HAUS8,NEDD1,TUBB,ORAOV1,E2F1,MYBL2,TUBA1B,TUBB3,TUBGCP3,TUBB6,TUBA1C,LI…
14_Member	GO Biological Processes	GO:0044839	cell cycle G2/M phase transition	-21.7996	-19.334	60/240	595,641,890,891,983,993,995,1017,1021,1063,1778,2305,3161,3320,4331,4361,4751,4869,5116,5347,5569,5700,5702,5705,5708,5717,6790,7283,8091,8317,9088,9133,9793,9833,9928,10383,10733,10763,11073,11113,22974,22995,23198,23354,51512,54801,55142,55215,55722,55835,63967,79866,80174,84131,84930,90381,93323,121441,203068,220064	CCND1,BLM,CCNA2,CCNB1,CDK1,CDC25A,CDC25C,CDK2,CDK6,CENPF,DYNC1H1,FOXM1,HMMR,HSP90AA1,MNAT1,MRE11,NEK2,NPM1,PCNT,PLK1,PKIA,PSMC1,PSMC3,PSMC5,PSMD2,PSMD11,AURKA,TUBG1,HMGA2,CDC7,PKMYT1,CCNB2,CKAP5,MELK,KIF14,TUBB4B,PLK4,NES,TOPBP1,CIT,TPX2,CEP152,PSME4,HAUS5,GTSE1,HAUS6,HAUS2,FANCI,CEP72,CENPJ,CLSPN,BORA,DBF4B,CEP78,MASTL,TICRR,HAUS8,NEDD1,TUBB,ORAOV1
14_Member	GO Biological Processes	GO:0000086	G2/M transition of mitotic cell cycle	-21.1917	-18.751	58/231	595,641,890,891,983,993,995,1017,1021,1063,1778,2305,3161,3320,4331,4361,4751,5116,5347,5569,5700,5702,5705,5708,5717,6790,7283,8091,8317,9088,9133,9793,9833,9928,10383,10733,10763,11073,11113,22974,22995,23198,23354,54801,55142,55215,55722,55835,63967,79866,80174,84131,84930,90381,93323,121441,203068,220064	CCND1,BLM,CCNA2,CCNB1,CDK1,CDC25A,CDC25C,CDK2,CDK6,CENPF,DYNC1H1,FOXM1,HMMR,HSP90AA1,MNAT1,MRE11,NEK2,PCNT,PLK1,PKIA,PSMC1,PSMC3,PSMC5,PSMD2,PSMD11,AURKA,TUBG1,HMGA2,CDC7,PKMYT1,CCNB2,CKAP5,MELK,KIF14,TUBB4B,PLK4,NES,TOPBP1,CIT,TPX2,CEP152,PSME4,HAUS5,HAUS6,HAUS2,FANCI,CEP72,CENPJ,CLSPN,BORA,DBF4B,CEP78,MASTL,TICRR,HAUS8,NEDD1,TUBB,ORAOV1
14_Member	Reactome Gene Sets	R-HSA-453274	Mitotic G2-G2/M phases	-18.4652	-16.106	50/198	890,891,983,993,995,1017,1063,1778,1869,2305,3161,3320,4331,4605,4751,5116,5347,5700,5702,5705,5708,5717,6790,7283,9088,9133,9793,10376,10381,10383,10426,10733,22974,22995,23198,23354,51512,54801,55142,55722,55835,79866,84131,84617,84790,93323,121441,132660,203068,286826	CCNA2,CCNB1,CDK1,CDC25A,CDC25C,CDK2,CENPF,DYNC1H1,E2F1,FOXM1,HMMR,HSP90AA1,MNAT1,MYBL2,NEK2,PCNT,PLK1,PSMC1,PSMC3,PSMC5,PSMD2,PSMD11,AURKA,TUBG1,PKMYT1,CCNB2,CKAP5,TUBA1B,TUBB3,TUBB4B,TUBGCP3,PLK4,TPX2,CEP152,PSME4,HAUS5,GTSE1,HAUS6,HAUS2,CEP72,CENPJ,BORA,CEP78,TUBB6,TUBA1C,HAUS8,NEDD1,LIN54,TUBB,LIN9
14_Member	Reactome Gene Sets	R-HSA-69275	G2/M Transition	-17.9108	-15.574	49/196	890,891,983,993,995,1017,1063,1778,2305,3161,3320,4331,4605,4751,5116,5347,5700,5702,5705,5708,5717,6790,7283,9088,9133,9793,10376,10381,10383,10426,10733,22974,22995,23198,23354,51512,54801,55142,55722,55835,79866,84131,84617,84790,93323,121441,132660,203068,286826	CCNA2,CCNB1,CDK1,CDC25A,CDC25C,CDK2,CENPF,DYNC1H1,FOXM1,HMMR,HSP90AA1,MNAT1,MYBL2,NEK2,PCNT,PLK1,PSMC1,PSMC3,PSMC5,PSMD2,PSMD11,AURKA,TUBG1,PKMYT1,CCNB2,CKAP5,TUBA1B,TUBB3,TUBB4B,TUBGCP3,PLK4,TPX2,CEP152,PSME4,HAUS5,GTSE1,HAUS6,HAUS2,CEP72,CENPJ,BORA,CEP78,TUBB6,TUBA1C,HAUS8,NEDD1,LIN54,TUBB,LIN9
14_Member	Reactome Gene Sets	R-HSA-380270	Recruitment of mitotic centrosome proteins and complexes	-10.8936	-8.891	26/94	891,983,1778,3320,4751,5116,5347,7283,9793,10376,10381,10383,10426,10733,22995,23354,54801,55142,55722,55835,84131,84617,84790,93323,121441,203068	CCNB1,CDK1,DYNC1H1,HSP90AA1,NEK2,PCNT,PLK1,TUBG1,CKAP5,TUBA1B,TUBB3,TUBB4B,TUBGCP3,PLK4,CEP152,HAUS5,HAUS6,HAUS2,CEP72,CENPJ,CEP78,TUBB6,TUBA1C,HAUS8,NEDD1,TUBB
14_Member	Reactome Gene Sets	R-HSA-380287	Centrosome maturation	-10.8936	-8.891	26/94	891,983,1778,3320,4751,5116,5347,7283,9793,10376,10381,10383,10426,10733,22995,23354,54801,55142,55722,55835,84131,84617,84790,93323,121441,203068	CCNB1,CDK1,DYNC1H1,HSP90AA1,NEK2,PCNT,PLK1,TUBG1,CKAP5,TUBA1B,TUBB3,TUBB4B,TUBGCP3,PLK4,CEP152,HAUS5,HAUS6,HAUS2,CEP72,CENPJ,CEP78,TUBB6,TUBA1C,HAUS8,NEDD1,TUBB
14_Member	Reactome Gene Sets	R-HSA-8854518	AURKA Activation by TPX2	-10.8607	-8.86	23/74	983,1778,3161,3320,4751,5116,5347,6790,7283,9793,10383,10733,22974,22995,23354,54801,55142,55722,55835,84131,93323,121441,203068	CDK1,DYNC1H1,HMMR,HSP90AA1,NEK2,PCNT,PLK1,AURKA,TUBG1,CKAP5,TUBB4B,PLK4,TPX2,CEP152,HAUS5,HAUS6,HAUS2,CEP72,CENPJ,CEP78,HAUS8,NEDD1,TUBB
14_Member	Reactome Gene Sets	R-HSA-2565942	Regulation of PLK1 Activity at G2/M Transition	-9.85481	-7.925	24/89	891,983,1778,3320,4751,5116,5347,6790,7283,9133,9793,10383,10733,22995,23354,54801,55142,55722,55835,79866,84131,93323,121441,203068	CCNB1,CDK1,DYNC1H1,HSP90AA1,NEK2,PCNT,PLK1,AURKA,TUBG1,CCNB2,CKAP5,TUBB4B,PLK4,CEP152,HAUS5,HAUS6,HAUS2,CEP72,CENPJ,BORA,CEP78,HAUS8,NEDD1,TUBB
14_Member	Reactome Gene Sets	R-HSA-380259	Loss of Nlp from mitotic centrosomes	-8.68646	-6.844	20/71	983,1778,3320,4751,5116,5347,7283,9793,10383,10733,22995,23354,54801,55142,55722,55835,84131,93323,121441,203068	CDK1,DYNC1H1,HSP90AA1,NEK2,PCNT,PLK1,TUBG1,CKAP5,TUBB4B,PLK4,CEP152,HAUS5,HAUS6,HAUS2,CEP72,CENPJ,CEP78,HAUS8,NEDD1,TUBB
14_Member	Reactome Gene Sets	R-HSA-380284	Loss of proteins required for interphase microtubule organization from the centrosome	-8.68646	-6.844	20/71	983,1778,3320,4751,5116,5347,7283,9793,10383,10733,22995,23354,54801,55142,55722,55835,84131,93323,121441,203068	CDK1,DYNC1H1,HSP90AA1,NEK2,PCNT,PLK1,TUBG1,CKAP5,TUBB4B,PLK4,CEP152,HAUS5,HAUS6,HAUS2,CEP72,CENPJ,CEP78,HAUS8,NEDD1,TUBB
14_Member	GO Biological Processes	GO:0097711	ciliary basal body docking	-8.284	-6.477	23/97	983,1778,3320,4751,5116,5347,7283,9793,10383,10733,22995,23354,54801,55142,55722,55835,79598,84131,84902,93323,121441,203068,347240	CDK1,DYNC1H1,HSP90AA1,NEK2,PCNT,PLK1,TUBG1,CKAP5,TUBB4B,PLK4,CEP152,HAUS5,HAUS6,HAUS2,CEP72,CENPJ,CEP97,CEP78,CEP89,HAUS8,NEDD1,TUBB,KIF24
14_Member	Reactome Gene Sets	R-HSA-5620912	Anchoring of the basal body to the plasma membrane	-8.10148	-6.307	23/99	983,1778,3320,4751,5116,5347,7283,9793,10383,10733,22995,23354,54801,55142,55722,55835,79598,84131,84902,93323,121441,203068,347240	CDK1,DYNC1H1,HSP90AA1,NEK2,PCNT,PLK1,TUBG1,CKAP5,TUBB4B,PLK4,CEP152,HAUS5,HAUS6,HAUS2,CEP72,CENPJ,CEP97,CEP78,CEP89,HAUS8,NEDD1,TUBB,KIF24
14_Member	GO Biological Processes	GO:0030031	cell projection assembly	-5.59265	-4.044	59/543	857,983,1072,1778,1809,1901,1969,2150,3265,3320,3815,4651,4751,5116,5205,5216,5347,5420,5880,5898,5990,6674,7283,7430,9353,9786,9788,9793,10096,10097,10383,10733,10938,11135,22995,23093,23216,23224,23354,23603,25886,54801,55130,55142,55704,55722,55835,57451,79598,79902,84131,84140,84902,93323,121441,203068,286827,347240,374407	CAV1,CDK1,CFL1,DYNC1H1,DPYSL3,S1PR1,EPHA2,F2RL1,HRAS,HSP90AA1,KIT,MYO10,NEK2,PCNT,ATP8B1,PFN1,PLK1,PODXL,RAC2,RALA,RFX2,SPAG1,TUBG1,EZR,SLIT2,KIAA0586,MTSS1,CKAP5,ACTR3,ACTR2,TUBB4B,PLK4,EHD1,CDC42EP1,CEP152,TTLL5,TBC1D1,SYNE2,HAUS5,CORO1C,POC1A,HAUS6,ARMC4,HAUS2,CCDC88A,CEP72,CENPJ,TENM2,CEP97,NUP85,CEP78,FAM161A,CEP89,HAUS8,NEDD1,TUBB,TRIM59,KIF24,DNAJB13
14_Member	Reactome Gene Sets	R-HSA-5617833	Cilium Assembly	-5.15197	-3.648	29/204	983,1778,3320,4751,5116,5347,6950,7283,9793,10376,10381,10383,10576,10733,22995,23354,54801,55142,55722,55835,79598,84131,84617,84790,84902,93323,121441,203068,347240	CDK1,DYNC1H1,HSP90AA1,NEK2,PCNT,PLK1,TCP1,TUBG1,CKAP5,TUBA1B,TUBB3,TUBB4B,CCT2,PLK4,CEP152,HAUS5,HAUS6,HAUS2,CEP72,CENPJ,CEP97,CEP78,TUBB6,TUBA1C,CEP89,HAUS8,NEDD1,TUBB,KIF24
14_Member	GO Biological Processes	GO:0022406	membrane docking	-5.12376	-3.623	26/173	858,983,1778,3320,4478,4751,5116,5347,7283,7430,9793,10383,10733,22995,23354,54801,55142,55722,55835,79598,84131,84902,93323,121441,203068,347240	CAV2,CDK1,DYNC1H1,HSP90AA1,MSN,NEK2,PCNT,PLK1,TUBG1,EZR,CKAP5,TUBB4B,PLK4,CEP152,HAUS5,HAUS6,HAUS2,CEP72,CENPJ,CEP97,CEP78,CEP89,HAUS8,NEDD1,TUBB,KIF24
14_Member	GO Biological Processes	GO:0060271	cilium assembly	-3.52403	-2.207	38/362	983,1778,3320,4751,5116,5347,5990,6674,7283,9786,9793,10096,10097,10383,10733,10938,22995,23093,23216,23224,23354,25886,54801,55130,55142,55704,55722,55835,79598,84131,84140,84902,93323,121441,203068,286827,347240,374407	CDK1,DYNC1H1,HSP90AA1,NEK2,PCNT,PLK1,RFX2,SPAG1,TUBG1,KIAA0586,CKAP5,ACTR3,ACTR2,TUBB4B,PLK4,EHD1,CEP152,TTLL5,TBC1D1,SYNE2,HAUS5,POC1A,HAUS6,ARMC4,HAUS2,CCDC88A,CEP72,CENPJ,CEP97,CEP78,FAM161A,CEP89,HAUS8,NEDD1,TUBB,TRIM59,KIF24,DNAJB13
14_Member	GO Biological Processes	GO:0044782	cilium organization	-3.36082	-2.064	38/369	983,1778,3320,4751,5116,5347,5990,6674,7283,9786,9793,10096,10097,10383,10733,10938,22995,23093,23216,23224,23354,25886,54801,55130,55142,55704,55722,55835,79598,84131,84140,84902,93323,121441,203068,286827,347240,374407	CDK1,DYNC1H1,HSP90AA1,NEK2,PCNT,PLK1,RFX2,SPAG1,TUBG1,KIAA0586,CKAP5,ACTR3,ACTR2,TUBB4B,PLK4,EHD1,CEP152,TTLL5,TBC1D1,SYNE2,HAUS5,POC1A,HAUS6,ARMC4,HAUS2,CCDC88A,CEP72,CENPJ,CEP97,CEP78,FAM161A,CEP89,HAUS8,NEDD1,TUBB,TRIM59,KIF24,DNAJB13
15_Summary	GO Biological Processes	GO:0051321	meiotic cell cycle	-21.3455	-18.894	59/237	675,699,701,983,991,1017,2067,2175,2177,2956,3014,3955,4288,4361,4627,4751,5347,5885,5888,5932,6790,7153,7272,7283,7516,7517,8243,8438,9126,9134,9156,9184,9232,9319,9700,9918,10051,10096,10097,10426,10592,23310,23397,25777,25788,26271,29893,55706,56776,57697,81930,83990,84057,84930,146956,151246,151648,220064,259266	BRCA2,BUB1,BUB1B,CDK1,CDC20,CDK2,ERCC1,FANCA,FANCD2,MSH6,H2AFX,LFNG,MKI67,MRE11,MYH9,NEK2,PLK1,RAD21,RAD51,RBBP8,AURKA,TOP2A,TTK,TUBG1,XRCC2,XRCC3,SMC1A,RAD54L,SMC3,CCNE2,EXO1,BUB3,PTTG1,TRIP13,ESPL1,NCAPD2,SMC4,ACTR3,ACTR2,TUBGCP3,SMC2,NCAPD3,NCAPH,SUN2,RAD54B,FBXO5,PSMC3IP,NDC1,FMN2,FANCM,KIF18A,BRIP1,MND1,MASTL,EME1,SGO2,SGO1,ORAOV1,ASPM
15_Member	GO Biological Processes	GO:0051321	meiotic cell cycle	-21.3455	-18.894	59/237	675,699,701,983,991,1017,2067,2175,2177,2956,3014,3955,4288,4361,4627,4751,5347,5885,5888,5932,6790,7153,7272,7283,7516,7517,8243,8438,9126,9134,9156,9184,9232,9319,9700,9918,10051,10096,10097,10426,10592,23310,23397,25777,25788,26271,29893,55706,56776,57697,81930,83990,84057,84930,146956,151246,151648,220064,259266	BRCA2,BUB1,BUB1B,CDK1,CDC20,CDK2,ERCC1,FANCA,FANCD2,MSH6,H2AFX,LFNG,MKI67,MRE11,MYH9,NEK2,PLK1,RAD21,RAD51,RBBP8,AURKA,TOP2A,TTK,TUBG1,XRCC2,XRCC3,SMC1A,RAD54L,SMC3,CCNE2,EXO1,BUB3,PTTG1,TRIP13,ESPL1,NCAPD2,SMC4,ACTR3,ACTR2,TUBGCP3,SMC2,NCAPD3,NCAPH,SUN2,RAD54B,FBXO5,PSMC3IP,NDC1,FMN2,FANCM,KIF18A,BRIP1,MND1,MASTL,EME1,SGO2,SGO1,ORAOV1,ASPM
15_Member	GO Biological Processes	GO:1903046	meiotic cell cycle process	-19.2301	-16.842	51/198	675,699,701,991,1017,2067,2175,2177,2956,3955,4288,4361,4627,5347,5885,5888,6790,7153,7272,7283,7516,7517,8243,8438,9126,9134,9232,9319,9700,9918,10051,10096,10097,10426,10592,23310,23397,25788,26271,55706,56776,57697,81930,83990,84057,84930,146956,151246,151648,220064,259266	BRCA2,BUB1,BUB1B,CDC20,CDK2,ERCC1,FANCA,FANCD2,MSH6,LFNG,MKI67,MRE11,MYH9,PLK1,RAD21,RAD51,AURKA,TOP2A,TTK,TUBG1,XRCC2,XRCC3,SMC1A,RAD54L,SMC3,CCNE2,PTTG1,TRIP13,ESPL1,NCAPD2,SMC4,ACTR3,ACTR2,TUBGCP3,SMC2,NCAPD3,NCAPH,RAD54B,FBXO5,NDC1,FMN2,FANCM,KIF18A,BRIP1,MND1,MASTL,EME1,SGO2,SGO1,ORAOV1,ASPM
15_Member	GO Biological Processes	GO:0007126	meiotic nuclear division	-16.5566	-14.279	46/187	675,699,701,991,1017,2067,2175,2177,2956,3955,4288,4361,5347,5885,5888,6790,7153,7272,7516,7517,8243,8438,9126,9134,9232,9319,9700,10051,10096,10097,10426,10592,23397,25788,26271,55706,56776,57697,81930,83990,84057,84930,146956,151246,151648,259266	BRCA2,BUB1,BUB1B,CDC20,CDK2,ERCC1,FANCA,FANCD2,MSH6,LFNG,MKI67,MRE11,PLK1,RAD21,RAD51,AURKA,TOP2A,TTK,XRCC2,XRCC3,SMC1A,RAD54L,SMC3,CCNE2,PTTG1,TRIP13,ESPL1,SMC4,ACTR3,ACTR2,TUBGCP3,SMC2,NCAPH,RAD54B,FBXO5,NDC1,FMN2,FANCM,KIF18A,BRIP1,MND1,MASTL,EME1,SGO2,SGO1,ASPM
15_Member	GO Biological Processes	GO:0045132	meiotic chromosome segregation	-9.17742	-7.296	23/88	699,701,2177,4361,5347,7153,7272,9134,9232,9319,9700,10051,10096,10097,10592,23397,55706,56776,57697,83990,146956,151246,151648	BUB1,BUB1B,FANCD2,MRE11,PLK1,TOP2A,TTK,CCNE2,PTTG1,TRIP13,ESPL1,SMC4,ACTR3,ACTR2,SMC2,NCAPH,NDC1,FMN2,FANCM,BRIP1,EME1,SGO2,SGO1
15_Member	GO Biological Processes	GO:0007127	meiosis I	-7.84932	-6.076	24/110	675,2067,2177,2956,4361,5347,5885,5888,6790,7153,7516,7517,9134,9232,9319,9700,25788,26271,55706,56776,57697,83990,84057,146956	BRCA2,ERCC1,FANCD2,MSH6,MRE11,PLK1,RAD21,RAD51,AURKA,TOP2A,XRCC2,XRCC3,CCNE2,PTTG1,TRIP13,ESPL1,RAD54B,FBXO5,NDC1,FMN2,FANCM,BRIP1,MND1,EME1
15_Member	GO Biological Processes	GO:0070192	chromosome organization involved in meiotic cell cycle	-5.29277	-3.774	15/67	699,701,2177,4361,5888,9134,9319,9918,10051,10592,23310,23397,55706,83990,151246	BUB1,BUB1B,FANCD2,MRE11,RAD51,CCNE2,TRIP13,NCAPD2,SMC4,SMC2,NCAPD3,NCAPH,NDC1,BRIP1,SGO2
15_Member	GO Biological Processes	GO:0035825	reciprocal DNA recombination	-5.07731	-3.582	17137	4361,5885,5888,7153,7516,7517,9319,25788,57697,83990,84057,146956	MRE11,RAD21,RAD51,TOP2A,XRCC2,XRCC3,TRIP13,RAD54B,FANCM,BRIP1,MND1,EME1
15_Member	GO Biological Processes	GO:0007131	reciprocal meiotic recombination	-5.07731	-3.582	17137	4361,5885,5888,7153,7516,7517,9319,25788,57697,83990,84057,146956	MRE11,RAD21,RAD51,TOP2A,XRCC2,XRCC3,TRIP13,RAD54B,FANCM,BRIP1,MND1,EME1
15_Member	GO Biological Processes	GO:0045143	homologous chromosome segregation	-2.66082	-1.469	22190	2177,4361,5347,9134,9232,9319,9700,55706,56776,83990	FANCD2,MRE11,PLK1,CCNE2,PTTG1,TRIP13,ESPL1,NDC1,FMN2,BRIP1
16_Summary	GO Biological Processes	GO:0051983	regulation of chromosome segregation	-19.2414	-16.848	33/82	699,701,891,990,1062,1063,1663,1894,2237,4085,4288,4751,5347,5885,7272,7517,9184,9212,9700,9787,10403,10460,10615,11004,11065,25906,29127,56852,84250,90417,113130,116028,348654,858,995,1104,1906,1950,3832,5902,6790,9088,9585,9735,22974,26271,27085,51203,54443,79598,79866,83987,84722,991,7153,9918,23310,57697,146956,54908,57082,83903,672,1786,2067,3159,3178,6418,9401,29028,54984,65057,55159	BUB1,BUB1B,CCNB1,CDC6,CENPE,CENPF,DDX11,ECT2,FEN1,MAD2L1,MKI67,NEK2,PLK1,RAD21,TTK,XRCC3,BUB3,AURKB,ESPL1,DLGAP5,NDC80,TACC3,SPAG5,KIF2C,UBE2C,ANAPC15,RACGAP1,RAD18,SLF1,KNSTRN,CDCA5,RMI2,GEN1,CAV2,CDC25C,RCC1,EDN1,EGF,KIF11,RANBP1,AURKA,PKMYT1,KIF20B,KNTC1,TPX2,FBXO5,MTBP,NUSAP1,ANLN,CEP97,BORA,CCDC8,PSRC1,CDC20,TOP2A,NCAPD2,NCAPD3,FANCM,EME1,SPDL1,KNL1,GSG2,BRCA1,DNMT1,ERCC1,HMGA1,HNRNPA1,SET,R…
16_Member	GO Biological Processes	GO:0051983	regulation of chromosome segregation	-19.2414	-16.848	33/82	699,701,891,990,1062,1063,1663,1894,2237,4085,4288,4751,5347,5885,7272,7517,9184,9212,9700,9787,10403,10460,10615,11004,11065,25906,29127,56852,84250,90417,113130,116028,348654	BUB1,BUB1B,CCNB1,CDC6,CENPE,CENPF,DDX11,ECT2,FEN1,MAD2L1,MKI67,NEK2,PLK1,RAD21,TTK,XRCC3,BUB3,AURKB,ESPL1,DLGAP5,NDC80,TACC3,SPAG5,KIF2C,UBE2C,ANAPC15,RACGAP1,RAD18,SLF1,KNSTRN,CDCA5,RMI2,GEN1
16_Member	GO Biological Processes	GO:0007088	regulation of mitotic nuclear division	-16.5844	-14.297	41/150	699,701,858,891,990,995,1062,1063,1104,1906,1950,3832,4085,4288,4751,5347,5902,6790,7272,7517,9088,9585,9700,9735,9787,10403,10460,11065,22974,25906,26271,27085,51203,54443,79598,79866,83987,84250,84722,113130,348654	BUB1,BUB1B,CAV2,CCNB1,CDC6,CDC25C,CENPE,CENPF,RCC1,EDN1,EGF,KIF11,MAD2L1,MKI67,NEK2,PLK1,RANBP1,AURKA,TTK,XRCC3,PKMYT1,KIF20B,ESPL1,KNTC1,DLGAP5,NDC80,TACC3,UBE2C,TPX2,ANAPC15,FBXO5,MTBP,NUSAP1,ANLN,CEP97,BORA,CCDC8,SLF1,PSRC1,CDCA5,GEN1
16_Member	GO Biological Processes	GO:0051783	regulation of nuclear division	-15.0513	-12.834	42/172	699,701,858,891,990,991,995,1062,1063,1104,1906,1950,3832,4085,4288,4751,5347,5902,6790,7272,7517,9088,9585,9700,9735,9787,10403,10460,11065,22974,25906,26271,27085,51203,54443,79598,79866,83987,84250,84722,113130,348654	BUB1,BUB1B,CAV2,CCNB1,CDC6,CDC20,CDC25C,CENPE,CENPF,RCC1,EDN1,EGF,KIF11,MAD2L1,MKI67,NEK2,PLK1,RANBP1,AURKA,TTK,XRCC3,PKMYT1,KIF20B,ESPL1,KNTC1,DLGAP5,NDC80,TACC3,UBE2C,TPX2,ANAPC15,FBXO5,MTBP,NUSAP1,ANLN,CEP97,BORA,CCDC8,SLF1,PSRC1,CDCA5,GEN1
16_Member	GO Biological Processes	GO:0033045	regulation of sister chromatid segregation	-12.5367	-10.426	23/63	699,701,891,990,1062,1063,1663,2237,4085,5347,5885,7272,7517,9700,9787,10403,10460,11065,25906,84250,113130,116028,348654	BUB1,BUB1B,CCNB1,CDC6,CENPE,CENPF,DDX11,FEN1,MAD2L1,PLK1,RAD21,TTK,XRCC3,ESPL1,DLGAP5,NDC80,TACC3,UBE2C,ANAPC15,SLF1,CDCA5,RMI2,GEN1
16_Member	GO Biological Processes	GO:0051304	chromosome separation	-10.9523	-8.941	22/67	699,701,891,990,1062,1063,4085,5347,7153,7272,7517,9700,9787,9918,10403,10460,11065,23310,25906,57697,146956,348654	BUB1,BUB1B,CCNB1,CDC6,CENPE,CENPF,MAD2L1,PLK1,TOP2A,TTK,XRCC3,ESPL1,DLGAP5,NCAPD2,NDC80,TACC3,UBE2C,NCAPD3,ANAPC15,FANCM,EME1,GEN1
16_Member	GO Biological Processes	GO:0031577	spindle checkpoint	-10.4501	-8.482	16/36	699,701,891,1063,4085,5347,7272,7517,9184,9212,10403,25906,54908,57082,83903,348654	BUB1,BUB1B,CCNB1,CENPF,MAD2L1,PLK1,TTK,XRCC3,BUB3,AURKB,NDC80,ANAPC15,SPDL1,KNL1,GSG2,GEN1
16_Member	GO Biological Processes	GO:0010965	regulation of mitotic sister chromatid separation	-9.88932	-7.954	17/44	699,701,891,990,1062,1063,4085,5347,7272,7517,9700,9787,10403,10460,11065,25906,348654	BUB1,BUB1B,CCNB1,CDC6,CENPE,CENPF,MAD2L1,PLK1,TTK,XRCC3,ESPL1,DLGAP5,NDC80,TACC3,UBE2C,ANAPC15,GEN1
16_Member	GO Biological Processes	GO:0007091	metaphase/anaphase transition of mitotic cell cycle	-9.88932	-7.954	17/44	699,701,891,990,1062,1063,4085,5347,7272,7517,9700,9787,10403,10460,11065,25906,348654	BUB1,BUB1B,CCNB1,CDC6,CENPE,CENPF,MAD2L1,PLK1,TTK,XRCC3,ESPL1,DLGAP5,NDC80,TACC3,UBE2C,ANAPC15,GEN1
16_Member	GO Biological Processes	GO:0044784	metaphase/anaphase transition of cell cycle	-9.70729	-7.793	17/45	699,701,891,990,1062,1063,4085,5347,7272,7517,9700,9787,10403,10460,11065,25906,348654	BUB1,BUB1B,CCNB1,CDC6,CENPE,CENPF,MAD2L1,PLK1,TTK,XRCC3,ESPL1,DLGAP5,NDC80,TACC3,UBE2C,ANAPC15,GEN1
16_Member	GO Biological Processes	GO:1905818	regulation of chromosome separation	-9.70729	-7.793	17/45	699,701,891,990,1062,1063,4085,5347,7272,7517,9700,9787,10403,10460,11065,25906,348654	BUB1,BUB1B,CCNB1,CDC6,CENPE,CENPF,MAD2L1,PLK1,TTK,XRCC3,ESPL1,DLGAP5,NDC80,TACC3,UBE2C,ANAPC15,GEN1
16_Member	GO Biological Processes	GO:0033047	regulation of mitotic sister chromatid segregation	-9.66908	-7.763	18/51	699,701,891,990,1062,1063,4085,5347,7272,7517,9700,9787,10403,10460,11065,25906,84250,348654	BUB1,BUB1B,CCNB1,CDC6,CENPE,CENPF,MAD2L1,PLK1,TTK,XRCC3,ESPL1,DLGAP5,NDC80,TACC3,UBE2C,ANAPC15,SLF1,GEN1
16_Member	GO Biological Processes	GO:0051306	mitotic sister chromatid separation	-9.53095	-7.628	17/46	699,701,891,990,1062,1063,4085,5347,7272,7517,9700,9787,10403,10460,11065,25906,348654	BUB1,BUB1B,CCNB1,CDC6,CENPE,CENPF,MAD2L1,PLK1,TTK,XRCC3,ESPL1,DLGAP5,NDC80,TACC3,UBE2C,ANAPC15,GEN1
16_Member	GO Biological Processes	GO:0030071	regulation of mitotic metaphase/anaphase transition	-9.2362	-7.349	16/42	699,701,891,990,1062,1063,4085,5347,7272,7517,9700,9787,10403,11065,25906,348654	BUB1,BUB1B,CCNB1,CDC6,CENPE,CENPF,MAD2L1,PLK1,TTK,XRCC3,ESPL1,DLGAP5,NDC80,UBE2C,ANAPC15,GEN1
16_Member	GO Biological Processes	GO:1902099	regulation of metaphase/anaphase transition of cell cycle	-9.05804	-7.184	16/43	699,701,891,990,1062,1063,4085,5347,7272,7517,9700,9787,10403,11065,25906,348654	BUB1,BUB1B,CCNB1,CDC6,CENPE,CENPF,MAD2L1,PLK1,TTK,XRCC3,ESPL1,DLGAP5,NDC80,UBE2C,ANAPC15,GEN1
16_Member	GO Biological Processes	GO:0071173	spindle assembly checkpoint	-8.89131	-7.033	13/28	699,701,891,1063,4085,5347,7272,7517,9184,10403,25906,57082,348654	BUB1,BUB1B,CCNB1,CENPF,MAD2L1,PLK1,TTK,XRCC3,BUB3,NDC80,ANAPC15,KNL1,GEN1
16_Member	GO Biological Processes	GO:0007094	mitotic spindle assembly checkpoint	-7.09058	-5.381	46327	699,701,891,1063,4085,5347,7272,7517,10403,25906,348654	BUB1,BUB1B,CCNB1,CENPF,MAD2L1,PLK1,TTK,XRCC3,NDC80,ANAPC15,GEN1
16_Member	GO Biological Processes	GO:0033046	negative regulation of sister chromatid segregation	-6.98553	-5.287	12024	699,701,891,1063,4085,5347,7272,7517,9700,10403,25906,348654	BUB1,BUB1B,CCNB1,CENPF,MAD2L1,PLK1,TTK,XRCC3,ESPL1,NDC80,ANAPC15,GEN1
16_Member	GO Biological Processes	GO:0051985	negative regulation of chromosome segregation	-6.81273	-5.135	12389	699,701,891,1063,4085,5347,7272,7517,9700,10403,25906,348654	BUB1,BUB1B,CCNB1,CENPF,MAD2L1,PLK1,TTK,XRCC3,ESPL1,NDC80,ANAPC15,GEN1
16_Member	GO Biological Processes	GO:2000816	negative regulation of mitotic sister chromatid separation	-6.69335	-5.036	47058	699,701,891,1063,4085,5347,7272,7517,10403,25906,348654	BUB1,BUB1B,CCNB1,CENPF,MAD2L1,PLK1,TTK,XRCC3,NDC80,ANAPC15,GEN1
16_Member	GO Biological Processes	GO:0071174	mitotic spindle checkpoint	-6.69335	-5.036	47058	699,701,891,1063,4085,5347,7272,7517,10403,25906,348654	BUB1,BUB1B,CCNB1,CENPF,MAD2L1,PLK1,TTK,XRCC3,NDC80,ANAPC15,GEN1
16_Member	GO Biological Processes	GO:0045841	negative regulation of mitotic metaphase/anaphase transition	-6.69335	-5.036	47058	699,701,891,1063,4085,5347,7272,7517,10403,25906,348654	BUB1,BUB1B,CCNB1,CENPF,MAD2L1,PLK1,TTK,XRCC3,NDC80,ANAPC15,GEN1
16_Member	GO Biological Processes	GO:2001251	negative regulation of chromosome organization	-6.6173	-4.968	22/109	672,699,701,891,1063,1786,2067,3159,3178,4085,5347,6418,7272,7517,9401,9700,10403,25906,29028,54984,65057,348654	BRCA1,BUB1,BUB1B,CCNB1,CENPF,DNMT1,ERCC1,HMGA1,HNRNPA1,MAD2L1,PLK1,SET,TTK,XRCC3,RECQL4,ESPL1,NDC80,ANAPC15,ATAD2,PINX1,ACD,GEN1
16_Member	GO Biological Processes	GO:1905819	negative regulation of chromosome separation	-6.50956	-4.876	47423	699,701,891,1063,4085,5347,7272,7517,10403,25906,348654	BUB1,BUB1B,CCNB1,CENPF,MAD2L1,PLK1,TTK,XRCC3,NDC80,ANAPC15,GEN1
16_Member	GO Biological Processes	GO:1902100	negative regulation of metaphase/anaphase transition of cell cycle	-6.50956	-4.876	47423	699,701,891,1063,4085,5347,7272,7517,10403,25906,348654	BUB1,BUB1B,CCNB1,CENPF,MAD2L1,PLK1,TTK,XRCC3,NDC80,ANAPC15,GEN1
16_Member	GO Biological Processes	GO:0033048	negative regulation of mitotic sister chromatid segregation	-6.33453	-4.717	11263	699,701,891,1063,4085,5347,7272,7517,10403,25906,348654	BUB1,BUB1B,CCNB1,CENPF,MAD2L1,PLK1,TTK,XRCC3,NDC80,ANAPC15,GEN1
16_Member	GO Biological Processes	GO:0045839	negative regulation of mitotic nuclear division	-5.91126	-4.331	14580	699,701,891,1063,4085,5347,7272,7517,10403,25906,27085,348654	BUB1,BUB1B,CCNB1,CENPF,MAD2L1,PLK1,TTK,XRCC3,NDC80,ANAPC15,MTBP,GEN1
16_Member	GO Biological Processes	GO:0051784	negative regulation of nuclear division	-5.54114	-3.998	13/49	699,701,891,1063,4085,5347,7272,7517,10403,25906,26271,27085,348654	BUB1,BUB1B,CCNB1,CENPF,MAD2L1,PLK1,TTK,XRCC3,NDC80,ANAPC15,FBXO5,MTBP,GEN1
16_Member	GO Biological Processes	GO:0090231	regulation of spindle checkpoint	-5.03803	-3.546	42186	891,4085,7517,10403,25906,83903,348654	CCNB1,MAD2L1,XRCC3,NDC80,ANAPC15,GSG2,GEN1
16_Member	GO Biological Processes	GO:0090266	regulation of mitotic cell cycle spindle assembly checkpoint	-4.59429	-3.15	43075	891,4085,7517,10403,25906,348654	CCNB1,MAD2L1,XRCC3,NDC80,ANAPC15,GEN1
16_Member	GO Biological Processes	GO:1903504	regulation of mitotic spindle checkpoint	-4.59429	-3.15	43075	891,4085,7517,10403,25906,348654	CCNB1,MAD2L1,XRCC3,NDC80,ANAPC15,GEN1
16_Member	GO Biological Processes	GO:1901976	regulation of cell cycle checkpoint	-3.53056	-2.212	11536	891,4085,7517,10403,25906,55159,83903,348654	CCNB1,MAD2L1,XRCC3,NDC80,ANAPC15,RFWD3,GSG2,GEN1
16_Member	GO Biological Processes	GO:0090267	positive regulation of mitotic cell cycle spindle assembly checkpoint	-3.46835	-2.157	42920	4085,7517,10403,348654	MAD2L1,XRCC3,NDC80,GEN1
16_Member	GO Biological Processes	GO:0090232	positive regulation of spindle checkpoint	-3.18773	-1.905	42951	4085,7517,10403,348654	MAD2L1,XRCC3,NDC80,GEN1
16_Member	GO Biological Processes	GO:1901978	positive regulation of cell cycle checkpoint	-2.75131	-1.547	43012	4085,7517,10403,348654	MAD2L1,XRCC3,NDC80,GEN1
17_Summary	GO Biological Processes	GO:0045787	positive regulation of cell cycle	-18.8005	-16.425	67/332	328,387,440,595,672,675,891,983,990,995,1017,1163,1663,1869,1894,1906,1950,1978,2237,2852,3398,4085,4331,4824,4869,5111,5885,5902,6790,7023,7027,7051,7517,8061,8091,8317,8318,8502,8851,9212,9493,9585,9700,9787,9928,10403,10733,10755,10769,11065,11113,25886,27085,29127,51203,51512,55835,57060,79733,80174,81610,84250,84722,113130,144455,201161,348654	APEX1,RHOA,ASNS,CCND1,BRCA1,BRCA2,CCNB1,CDK1,CDC6,CDC25C,CDK2,CKS1B,DDX11,E2F1,ECT2,EDN1,EGF,EIF4EBP1,FEN1,GPER1,ID2,MAD2L1,MNAT1,NKX3-1,NPM1,PCNA,RAD21,RANBP1,AURKA,TFAP4,TFDP1,TGM1,XRCC3,FOSL1,HMGA2,CDC7,CDC45,PKP4,CDK5R1,AURKB,KIF23,KIF20B,ESPL1,DLGAP5,KIF14,NDC80,PLK4,GIPC1,PLK2,UBE2C,CIT,POC1A,MTBP,RACGAP1,NUSAP1,GTSE1,CENPJ,PCBP4,E2F8,DBF4B,FAM83D,SLF1,PSRC1,CDCA5,E2F7,CENPV,GEN1
17_Member	GO Biological Processes	GO:0045787	positive regulation of cell cycle	-18.8005	-16.425	67/332	328,387,440,595,672,675,891,983,990,995,1017,1163,1663,1869,1894,1906,1950,1978,2237,2852,3398,4085,4331,4824,4869,5111,5885,5902,6790,7023,7027,7051,7517,8061,8091,8317,8318,8502,8851,9212,9493,9585,9700,9787,9928,10403,10733,10755,10769,11065,11113,25886,27085,29127,51203,51512,55835,57060,79733,80174,81610,84250,84722,113130,144455,201161,348654	APEX1,RHOA,ASNS,CCND1,BRCA1,BRCA2,CCNB1,CDK1,CDC6,CDC25C,CDK2,CKS1B,DDX11,E2F1,ECT2,EDN1,EGF,EIF4EBP1,FEN1,GPER1,ID2,MAD2L1,MNAT1,NKX3-1,NPM1,PCNA,RAD21,RANBP1,AURKA,TFAP4,TFDP1,TGM1,XRCC3,FOSL1,HMGA2,CDC7,CDC45,PKP4,CDK5R1,AURKB,KIF23,KIF20B,ESPL1,DLGAP5,KIF14,NDC80,PLK4,GIPC1,PLK2,UBE2C,CIT,POC1A,MTBP,RACGAP1,NUSAP1,GTSE1,CENPJ,PCBP4,E2F8,DBF4B,FAM83D,SLF1,PSRC1,CDCA5,E2F7,CENPV,GEN1
17_Member	GO Biological Processes	GO:0090068	positive regulation of cell cycle process	-18.5899	-16.225	56/243	328,387,595,672,891,983,990,995,1017,1663,1869,1894,1906,1950,2237,3398,4085,4869,5111,5885,5902,6790,7027,7517,8091,8317,8318,8502,8851,9212,9493,9585,9700,9787,9928,10403,10733,10755,10769,11065,11113,25886,27085,29127,51203,51512,55835,57060,79733,80174,81610,84250,113130,144455,201161,348654	APEX1,RHOA,CCND1,BRCA1,CCNB1,CDK1,CDC6,CDC25C,CDK2,DDX11,E2F1,ECT2,EDN1,EGF,FEN1,ID2,MAD2L1,NPM1,PCNA,RAD21,RANBP1,AURKA,TFDP1,XRCC3,HMGA2,CDC7,CDC45,PKP4,CDK5R1,AURKB,KIF23,KIF20B,ESPL1,DLGAP5,KIF14,NDC80,PLK4,GIPC1,PLK2,UBE2C,CIT,POC1A,MTBP,RACGAP1,NUSAP1,GTSE1,CENPJ,PCBP4,E2F8,DBF4B,FAM83D,SLF1,CDCA5,E2F7,CENPV,GEN1
17_Member	GO Biological Processes	GO:0045931	positive regulation of mitotic cell cycle	-9.40936	-7.516	28/124	328,440,595,675,891,983,990,1906,1950,1978,4085,4824,5902,6790,7517,8317,8318,9585,9700,9787,10403,11065,27085,51203,80174,84250,113130,348654	APEX1,ASNS,CCND1,BRCA2,CCNB1,CDK1,CDC6,EDN1,EGF,EIF4EBP1,MAD2L1,NKX3-1,RANBP1,AURKA,XRCC3,CDC7,CDC45,KIF20B,ESPL1,DLGAP5,NDC80,UBE2C,MTBP,NUSAP1,DBF4B,SLF1,CDCA5,GEN1
17_Member	GO Biological Processes	GO:1901989	positive regulation of cell cycle phase transition	-4.34609	-2.933	13/62	328,595,990,4869,8317,8318,9700,9787,11065,27085,80174,81610,113130	APEX1,CCND1,CDC6,NPM1,CDC7,CDC45,ESPL1,DLGAP5,UBE2C,MTBP,DBF4B,FAM83D,CDCA5
17_Member	GO Biological Processes	GO:0045840	positive regulation of mitotic nuclear division	-3.69223	-2.359	16711	1906,1950,5902,6790,9700,9787,11065,51203,84250,113130	EDN1,EGF,RANBP1,AURKA,ESPL1,DLGAP5,UBE2C,NUSAP1,SLF1,CDCA5
17_Member	GO Biological Processes	GO:1901992	positive regulation of mitotic cell cycle phase transition	-3.57397	-2.253	20394	328,595,990,8317,8318,9700,9787,11065,27085,80174,113130	APEX1,CCND1,CDC6,CDC7,CDC45,ESPL1,DLGAP5,UBE2C,MTBP,DBF4B,CDCA5
17_Member	GO Biological Processes	GO:0051785	positive regulation of nuclear division	-2.95838	-1.71	20363	1906,1950,5902,6790,9700,9787,11065,51203,84250,113130	EDN1,EGF,RANBP1,AURKA,ESPL1,DLGAP5,UBE2C,NUSAP1,SLF1,CDCA5
18_Summary	GO Biological Processes	GO:0000731	DNA synthesis involved in DNA repair	-17.6598	-15.328	30/74	580,641,672,675,1032,1763,4361,5111,5422,5424,5426,5427,5888,5932,5983,5984,5985,6117,6119,7516,7517,9100,9156,9768,10635,10714,51514,80010,83990,116028,11073,84126,146956,348654,890,1017,2067,2237,3014,7468,8914,10038,10721,54962,63967,5591,55183,55775,666,891,983,995,1869,1870,2305,4436,4869,5366,6749,6790,7023,7027,8445,8851,9212,9521,9891,10769,10848,11198,22974,27063,27330,51512,55835,57060,…	BARD1,BLM,BRCA1,BRCA2,CDKN2D,DNA2,MRE11,PCNA,POLA1,POLD1,POLE,POLE2,RAD51,RBBP8,RFC3,RFC4,RFC5,RPA1,RPA3,XRCC2,XRCC3,USP10,EXO1,PCLAF,RAD51AP1,POLD3,DTL,RMI1,BRIP1,RMI2,TOPBP1,ATRIP,EME1,GEN1,CCNA2,CDK2,ERCC1,FEN1,H2AFX,NSD2,TIMELESS,PARP2,POLQ,TIPIN,CLSPN,PRKDC,RIF1,TDP1,BOK,CCNB1,CDK1,CDC25C,E2F1,E2F2,FOXM1,MSH2,NPM1,PMAIP1,SSRP1,AURKA,TFAP4,TFDP1,DYRK2,CDK5R1,AURKB,EEF1E1,NUAK1,PLK2,PPP1R13L,S…
18_Member	GO Biological Processes	GO:0000731	DNA synthesis involved in DNA repair	-17.6598	-15.328	30/74	580,641,672,675,1032,1763,4361,5111,5422,5424,5426,5427,5888,5932,5983,5984,5985,6117,6119,7516,7517,9100,9156,9768,10635,10714,51514,80010,83990,116028	BARD1,BLM,BRCA1,BRCA2,CDKN2D,DNA2,MRE11,PCNA,POLA1,POLD1,POLE,POLE2,RAD51,RBBP8,RFC3,RFC4,RFC5,RPA1,RPA3,XRCC2,XRCC3,USP10,EXO1,PCLAF,RAD51AP1,POLD3,DTL,RMI1,BRIP1,RMI2
18_Member	Reactome Gene Sets	R-HSA-5685942	HDR through Homologous Recombination (HRR)	-17.6113	-15.29	29/69	580,641,672,675,1763,4361,5111,5424,5426,5427,5888,5932,5983,5984,5985,6117,6119,7516,7517,9156,10635,10714,11073,80010,83990,84126,116028,146956,348654	BARD1,BLM,BRCA1,BRCA2,DNA2,MRE11,PCNA,POLD1,POLE,POLE2,RAD51,RBBP8,RFC3,RFC4,RFC5,RPA1,RPA3,XRCC2,XRCC3,EXO1,RAD51AP1,POLD3,TOPBP1,RMI1,BRIP1,ATRIP,RMI2,EME1,GEN1
18_Member	Reactome Gene Sets	R-HSA-5693538	Homology Directed Repair	-16.9394	-14.643	40/140	580,641,672,675,890,1017,1763,2067,2237,3014,4361,5111,5424,5426,5427,5888,5932,5983,5984,5985,6117,6119,7468,7516,7517,8914,9156,10038,10635,10714,10721,11073,54962,63967,80010,83990,84126,116028,146956,348654	BARD1,BLM,BRCA1,BRCA2,CCNA2,CDK2,DNA2,ERCC1,FEN1,H2AFX,MRE11,PCNA,POLD1,POLE,POLE2,RAD51,RBBP8,RFC3,RFC4,RFC5,RPA1,RPA3,NSD2,XRCC2,XRCC3,TIMELESS,EXO1,PARP2,RAD51AP1,POLD3,POLQ,TOPBP1,TIPIN,CLSPN,RMI1,BRIP1,ATRIP,RMI2,EME1,GEN1
18_Member	Reactome Gene Sets	R-HSA-5693532	DNA Double-Strand Break Repair	-16.1003	-13.827	43/169	580,641,672,675,890,1017,1763,2067,2237,3014,4361,5111,5424,5426,5427,5591,5888,5932,5983,5984,5985,6117,6119,7468,7516,7517,8914,9156,10038,10635,10714,10721,11073,54962,55183,55775,63967,80010,83990,84126,116028,146956,348654	BARD1,BLM,BRCA1,BRCA2,CCNA2,CDK2,DNA2,ERCC1,FEN1,H2AFX,MRE11,PCNA,POLD1,POLE,POLE2,PRKDC,RAD51,RBBP8,RFC3,RFC4,RFC5,RPA1,RPA3,NSD2,XRCC2,XRCC3,TIMELESS,EXO1,PARP2,RAD51AP1,POLD3,POLQ,TOPBP1,TIPIN,RIF1,TDP1,CLSPN,RMI1,BRIP1,ATRIP,RMI2,EME1,GEN1
18_Member	Reactome Gene Sets	R-HSA-5693579	Homologous DNA Pairing and Strand Exchange	-15.7807	-13.521	22/43	580,641,672,675,1763,4361,5888,5932,5983,5984,5985,6117,6119,7516,7517,9156,10635,11073,80010,83990,84126,116028	BARD1,BLM,BRCA1,BRCA2,DNA2,MRE11,RAD51,RBBP8,RFC3,RFC4,RFC5,RPA1,RPA3,XRCC2,XRCC3,EXO1,RAD51AP1,TOPBP1,RMI1,BRIP1,ATRIP,RMI2
18_Member	Reactome Gene Sets	R-HSA-5693567	HDR through Homologous Recombination (HR) or Single Strand Annealing (SSA)	-15.1878	-12.958	37/134	580,641,672,675,890,1017,1763,2067,3014,4361,5111,5424,5426,5427,5888,5932,5983,5984,5985,6117,6119,7468,7516,7517,8914,9156,10635,10714,11073,54962,63967,80010,83990,84126,116028,146956,348654	BARD1,BLM,BRCA1,BRCA2,CCNA2,CDK2,DNA2,ERCC1,H2AFX,MRE11,PCNA,POLD1,POLE,POLE2,RAD51,RBBP8,RFC3,RFC4,RFC5,RPA1,RPA3,NSD2,XRCC2,XRCC3,TIMELESS,EXO1,RAD51AP1,POLD3,TOPBP1,TIPIN,CLSPN,RMI1,BRIP1,ATRIP,RMI2,EME1,GEN1
18_Member	Reactome Gene Sets	R-HSA-5693616	Presynaptic phase of homologous DNA pairing and strand exchange	-14.1502	-11.975	20/40	580,641,672,675,1763,4361,5888,5932,5983,5984,5985,6117,6119,7516,9156,11073,80010,83990,84126,116028	BARD1,BLM,BRCA1,BRCA2,DNA2,MRE11,RAD51,RBBP8,RFC3,RFC4,RFC5,RPA1,RPA3,XRCC2,EXO1,TOPBP1,RMI1,BRIP1,ATRIP,RMI2
18_Member	GO Biological Processes	GO:0072331	signal transduction by p53 class mediator	-14.0697	-11.902	51/258	580,641,666,672,675,891,983,995,1017,1763,1869,1870,2305,4361,4436,4869,5111,5366,5932,5983,5984,5985,6117,6119,6749,6790,7023,7027,8445,8851,9100,9156,9212,9521,9891,10769,10848,11073,11198,22974,27063,27330,51512,55835,57060,80010,83596,83990,84126,116028,144455	BARD1,BLM,BOK,BRCA1,BRCA2,CCNB1,CDK1,CDC25C,CDK2,DNA2,E2F1,E2F2,FOXM1,MRE11,MSH2,NPM1,PCNA,PMAIP1,RBBP8,RFC3,RFC4,RFC5,RPA1,RPA3,SSRP1,AURKA,TFAP4,TFDP1,DYRK2,CDK5R1,USP10,EXO1,AURKB,EEF1E1,NUAK1,PLK2,PPP1R13L,TOPBP1,SUPT16H,TPX2,ANKRD1,RPS6KA6,GTSE1,CENPJ,PCBP4,RMI1,BCL2L12,BRIP1,ATRIP,RMI2,E2F7
18_Member	Reactome Gene Sets	R-HSA-5685938	HDR through Single Strand Annealing (SSA)	-13.4729	-11.329	19/38	580,641,672,1763,2067,4361,5888,5932,5983,5984,5985,6117,6119,9156,11073,80010,83990,84126,116028	BARD1,BLM,BRCA1,DNA2,ERCC1,MRE11,RAD51,RBBP8,RFC3,RFC4,RFC5,RPA1,RPA3,EXO1,TOPBP1,RMI1,BRIP1,ATRIP,RMI2
18_Member	GO Biological Processes	GO:0000732	strand displacement	-11.9672	-9.901	15/26	580,641,672,675,1763,4361,5888,5932,7516,7517,9156,10635,80010,83990,116028	BARD1,BLM,BRCA1,BRCA2,DNA2,MRE11,RAD51,RBBP8,XRCC2,XRCC3,EXO1,RAD51AP1,RMI1,BRIP1,RMI2
18_Member	Reactome Gene Sets	R-HSA-5693568	Resolution of D-loop Structures through Holliday Junction Intermediates	-11.8527	-9.792	17/35	580,641,672,675,1763,4361,5888,5932,7516,7517,9156,10635,80010,83990,116028,146956,348654	BARD1,BLM,BRCA1,BRCA2,DNA2,MRE11,RAD51,RBBP8,XRCC2,XRCC3,EXO1,RAD51AP1,RMI1,BRIP1,RMI2,EME1,GEN1
18_Member	Reactome Gene Sets	R-HSA-6804756	Regulation of TP53 Activity through Phosphorylation	-11.8376	-9.78	27/93	580,641,672,890,1017,1763,4361,5932,5983,5984,5985,6117,6119,6749,6790,8445,8851,9156,9212,9891,11073,11198,22974,80010,83990,84126,116028	BARD1,BLM,BRCA1,CCNA2,CDK2,DNA2,MRE11,RBBP8,RFC3,RFC4,RFC5,RPA1,RPA3,SSRP1,AURKA,DYRK2,CDK5R1,EXO1,AURKB,NUAK1,TOPBP1,SUPT16H,TPX2,RMI1,BRIP1,ATRIP,RMI2
18_Member	Reactome Gene Sets	R-HSA-5693554	Resolution of D-loop Structures through Synthesis-Dependent Strand Annealing (SDSA)	-11.6389	-9.587	15/27	580,641,672,675,1763,4361,5888,5932,7516,7517,9156,10635,80010,83990,116028	BARD1,BLM,BRCA1,BRCA2,DNA2,MRE11,RAD51,RBBP8,XRCC2,XRCC3,EXO1,RAD51AP1,RMI1,BRIP1,RMI2
18_Member	Reactome Gene Sets	R-HSA-5693537	Resolution of D-Loop Structures	-11.5992	-9.552	17/36	580,641,672,675,1763,4361,5888,5932,7516,7517,9156,10635,80010,83990,116028,146956,348654	BARD1,BLM,BRCA1,BRCA2,DNA2,MRE11,RAD51,RBBP8,XRCC2,XRCC3,EXO1,RAD51AP1,RMI1,BRIP1,RMI2,EME1,GEN1
18_Member	KEGG Pathway	ko03440	Homologous recombination	-11.5682	-9.527	18/41	580,641,672,675,4361,5424,5888,5932,6117,6119,7516,7517,8438,10714,11073,25788,83990,146956	BARD1,BLM,BRCA1,BRCA2,MRE11,POLD1,RAD51,RBBP8,RPA1,RPA3,XRCC2,XRCC3,RAD54L,POLD3,TOPBP1,RAD54B,BRIP1,EME1
18_Member	KEGG Pathway	hsa03440	Homologous recombination	-11.5682	-9.527	18/41	580,641,672,675,4361,5424,5888,5932,6117,6119,7516,7517,8438,10714,11073,25788,83990,146956	BARD1,BLM,BRCA1,BRCA2,MRE11,POLD1,RAD51,RBBP8,RPA1,RPA3,XRCC2,XRCC3,RAD54L,POLD3,TOPBP1,RAD54B,BRIP1,EME1
18_Member	Reactome Gene Sets	R-HSA-3700989	Transcriptional Regulation by TP53	-11.2781	-9.247	58/372	332,580,641,672,890,891,983,995,1017,1029,1763,1869,2177,2963,3486,4331,4361,4436,4869,5111,5305,5366,5932,5933,5983,5984,5985,6117,6119,6749,6790,7027,7533,7534,8445,8851,9134,9156,9212,9891,10000,10769,10848,10971,11073,11198,22974,54205,54815,55215,55835,57060,80010,83990,84126,116028,116228,144455	BIRC5,BARD1,BLM,BRCA1,CCNA2,CCNB1,CDK1,CDC25C,CDK2,CDKN2A,DNA2,E2F1,FANCD2,GTF2F2,IGFBP3,MNAT1,MRE11,MSH2,NPM1,PCNA,PIP4K2A,PMAIP1,RBBP8,RBL1,RFC3,RFC4,RFC5,RPA1,RPA3,SSRP1,AURKA,TFDP1,YWHAH,YWHAZ,DYRK2,CDK5R1,CCNE2,EXO1,AURKB,NUAK1,AKT3,PLK2,PPP1R13L,YWHAQ,TOPBP1,SUPT16H,TPX2,CYCS,GATAD2A,FANCI,CENPJ,PCBP4,RMI1,BRIP1,ATRIP,RMI2,COX20,E2F7
18_Member	Reactome Gene Sets	R-HSA-69473	G2/M DNA damage checkpoint	-9.87998	-7.947	25/96	580,641,672,891,983,995,1763,3014,4361,5932,5983,5984,5985,6117,6119,7468,7533,7534,9156,10971,11073,80010,83990,84126,116028	BARD1,BLM,BRCA1,CCNB1,CDK1,CDC25C,DNA2,H2AFX,MRE11,RBBP8,RFC3,RFC4,RFC5,RPA1,RPA3,NSD2,YWHAH,YWHAZ,EXO1,YWHAQ,TOPBP1,RMI1,BRIP1,ATRIP,RMI2
18_Member	Reactome Gene Sets	R-HSA-5633007	Regulation of TP53 Activity	-9.69929	-7.787	33/162	580,641,672,890,983,1017,1029,1763,4361,5305,5932,5983,5984,5985,6117,6119,6749,6790,8445,8851,9156,9212,9891,10000,10848,11073,11198,22974,54815,80010,83990,84126,116028	BARD1,BLM,BRCA1,CCNA2,CDK1,CDK2,CDKN2A,DNA2,MRE11,PIP4K2A,RBBP8,RFC3,RFC4,RFC5,RPA1,RPA3,SSRP1,AURKA,DYRK2,CDK5R1,EXO1,AURKB,NUAK1,AKT3,PPP1R13L,TOPBP1,SUPT16H,TPX2,GATAD2A,RMI1,BRIP1,ATRIP,RMI2
18_Member	Reactome Gene Sets	R-HSA-5693607	Processing of DNA double-strand break ends	-8.82365	-6.974	24/99	580,641,672,890,1017,1763,3014,4361,5932,5983,5984,5985,6117,6119,7468,8914,9156,11073,54962,63967,80010,83990,84126,116028	BARD1,BLM,BRCA1,CCNA2,CDK2,DNA2,H2AFX,MRE11,RBBP8,RFC3,RFC4,RFC5,RPA1,RPA3,NSD2,TIMELESS,EXO1,TOPBP1,TIPIN,CLSPN,RMI1,BRIP1,ATRIP,RMI2
18_Member	GO Biological Processes	GO:1901796	regulation of signal transduction by p53 class mediator	-8.39102	-6.57	31/163	580,641,672,1017,1763,4361,5366,5932,5983,5984,5985,6117,6119,6749,6790,8445,8851,9156,9212,9521,9891,10848,11073,11198,22974,27063,80010,83596,83990,84126,116028	BARD1,BLM,BRCA1,CDK2,DNA2,MRE11,PMAIP1,RBBP8,RFC3,RFC4,RFC5,RPA1,RPA3,SSRP1,AURKA,DYRK2,CDK5R1,EXO1,AURKB,EEF1E1,NUAK1,PPP1R13L,TOPBP1,SUPT16H,TPX2,ANKRD1,RMI1,BCL2L12,BRIP1,ATRIP,RMI2
18_Member	Reactome Gene Sets	R-HSA-212436	Generic Transcription Pathway	-4.0011	-2.629	77/861	332,580,641,672,860,890,891,983,995,1017,1029,1763,1869,2177,2963,3329,3486,3815,4331,4361,4436,4605,4869,5054,5111,5305,5308,5366,5932,5933,5983,5984,5985,6117,6119,6749,6790,7004,7027,7533,7534,7678,7753,7913,8089,8445,8851,9134,9156,9212,9442,9891,10000,10769,10848,10971,11073,11198,22974,23327,29028,54205,54815,55215,55835,57060,64750,80010,83990,84126,116028,116228,126382,144455,158431,19732…	BIRC5,BARD1,BLM,BRCA1,RUNX2,CCNA2,CCNB1,CDK1,CDC25C,CDK2,CDKN2A,DNA2,E2F1,FANCD2,GTF2F2,HSPD1,IGFBP3,KIT,MNAT1,MRE11,MSH2,MYBL2,NPM1,SERPINE1,PCNA,PIP4K2A,PITX2,PMAIP1,RBBP8,RBL1,RFC3,RFC4,RFC5,RPA1,RPA3,SSRP1,AURKA,TEAD4,TFDP1,YWHAH,YWHAZ,ZNF124,ZNF202,DEK,YEATS4,DYRK2,CDK5R1,CCNE2,EXO1,AURKB,MED27,NUAK1,AKT3,PLK2,PPP1R13L,YWHAQ,TOPBP1,SUPT16H,TPX2,NEDD4L,ATAD2,CYCS,GATAD2A,FANCI,CENPJ,PCBP4,SMU…
18_Member	GO Biological Processes	GO:0000729	DNA double-strand break processing	-3.50746	-2.192	45474	580,641,672,1763,4361,5932,83990	BARD1,BLM,BRCA1,DNA2,MRE11,RBBP8,BRIP1
19_Summary	Hallmark Gene Sets	M5930	HALLMARK EPITHELIAL MESENCHYMAL TRANSITION	-16.0577	-13.789	47/200	59,290,1000,1004,1277,1293,1303,1462,1809,2247,2335,2669,3371,3398,3486,3491,3673,3688,3918,3956,4015,4016,4148,4176,5021,5054,5329,5999,6382,6385,6876,7058,7070,7168,7169,7171,7424,7431,8038,8076,8325,9353,10085,10272,25878,50863,51330,87,3161,3675,3676,3679,1300,4233,1404,824,1305,1308,4319,4325,23127,302,2113,3037,151887	ACTA2,ANPEP,CDH2,CDH6,COL1A1,COL6A3,COL12A1,VCAN,DPYSL3,FGF2,FN1,GEM,TNC,ID2,IGFBP3,CYR61,ITGA2,ITGB1,LAMC2,LGALS1,LOX,LOXL1,MATN3,MCM7,OXTR,SERPINE1,PLAUR,RGS4,SDC1,SDC4,TAGLN,THBS2,THY1,TPM1,TPM2,TPM4,VEGFC,VIM,ADAM12,MFAP5,FZD8,SLIT2,EDIL3,FSTL3,MXRA5,NTM,TNFRSF12A,ACTN1,HMMR,ITGA3,ITGA4,ITGA7,COL10A1,MET,HAPLN1,CAPN2,COL13A1,COL17A1,MMP10,MMP16,COLGALT2,ANXA2,ETS1,HAS2,CCDC80
19_Member	Hallmark Gene Sets	M5930	HALLMARK EPITHELIAL MESENCHYMAL TRANSITION	-16.0577	-13.789	47/200	59,290,1000,1004,1277,1293,1303,1462,1809,2247,2335,2669,3371,3398,3486,3491,3673,3688,3918,3956,4015,4016,4148,4176,5021,5054,5329,5999,6382,6385,6876,7058,7070,7168,7169,7171,7424,7431,8038,8076,8325,9353,10085,10272,25878,50863,51330	ACTA2,ANPEP,CDH2,CDH6,COL1A1,COL6A3,COL12A1,VCAN,DPYSL3,FGF2,FN1,GEM,TNC,ID2,IGFBP3,CYR61,ITGA2,ITGB1,LAMC2,LGALS1,LOX,LOXL1,MATN3,MCM7,OXTR,SERPINE1,PLAUR,RGS4,SDC1,SDC4,TAGLN,THBS2,THY1,TPM1,TPM2,TPM4,VEGFC,VIM,ADAM12,MFAP5,FZD8,SLIT2,EDIL3,FSTL3,MXRA5,NTM,TNFRSF12A
19_Member	Reactome Gene Sets	R-HSA-3000170	Syndecan interactions	-4.60532	-3.156	47362	87,1277,2247,2335,3371,3673,3688,6382,6385	ACTN1,COL1A1,FGF2,FN1,TNC,ITGA2,ITGB1,SDC1,SDC4
19_Member	KEGG Pathway	hsa04512	ECM-receptor interaction	-3.61778	-2.292	14/82	1277,1293,2335,3161,3371,3673,3675,3676,3679,3688,3918,6382,6385,7058	COL1A1,COL6A3,FN1,HMMR,TNC,ITGA2,ITGA3,ITGA4,ITGA7,ITGB1,LAMC2,SDC1,SDC4,THBS2
19_Member	KEGG Pathway	ko04512	ECM-receptor interaction	-3.61778	-2.292	14/82	1277,1293,2335,3161,3371,3673,3675,3676,3679,3688,3918,6382,6385,7058	COL1A1,COL6A3,FN1,HMMR,TNC,ITGA2,ITGA3,ITGA4,ITGA7,ITGB1,LAMC2,SDC1,SDC4,THBS2
19_Member	Reactome Gene Sets	R-HSA-3000171	Non-integrin membrane-ECM interactions	-2.98758	-1.734	23682	87,1277,1300,2247,2335,3371,3673,3688,3918,6382,6385	ACTN1,COL1A1,COL10A1,FGF2,FN1,TNC,ITGA2,ITGB1,LAMC2,SDC1,SDC4
19_Member	Reactome Gene Sets	R-HSA-8874081	MET activates PTK2 signaling	-2.61436	-1.43	12236	1277,2335,3673,3675,3688,3918,4233	COL1A1,FN1,ITGA2,ITGA3,ITGB1,LAMC2,MET
19_Member	Reactome Gene Sets	R-HSA-3000178	ECM proteoglycans	-2.33118	-1.192	28430	1277,1293,1404,1462,2335,3371,3673,3679,3688,4148,5054	COL1A1,COL6A3,HAPLN1,VCAN,FN1,TNC,ITGA2,ITGA7,ITGB1,MATN3,SERPINE1
19_Member	Reactome Gene Sets	R-HSA-1474244	Extracellular matrix organization	-2.31013	-1.173	29/300	87,824,1277,1293,1300,1303,1305,1308,1404,1462,2247,2335,3371,3673,3675,3676,3679,3688,3918,4015,4016,4148,4319,4325,5054,6382,6385,8076,23127	ACTN1,CAPN2,COL1A1,COL6A3,COL10A1,COL12A1,COL13A1,COL17A1,HAPLN1,VCAN,FGF2,FN1,TNC,ITGA2,ITGA3,ITGA4,ITGA7,ITGB1,LAMC2,LOX,LOXL1,MATN3,MMP10,MMP16,SERPINE1,SDC1,SDC4,MFAP5,COLGALT2
19_Member	GO Biological Processes	GO:0030198	extracellular matrix organization	-2.00665	-0.929	29/316	302,824,1277,1293,1300,1303,1305,1404,1462,2113,2247,2335,3037,3371,3491,3673,3675,3676,3679,3688,3918,4015,4016,4148,4319,4325,5054,8076,151887	ANXA2,CAPN2,COL1A1,COL6A3,COL10A1,COL12A1,COL13A1,HAPLN1,VCAN,ETS1,FGF2,FN1,HAS2,TNC,CYR61,ITGA2,ITGA3,ITGA4,ITGA7,ITGB1,LAMC2,LOX,LOXL1,MATN3,MMP10,MMP16,SERPINE1,MFAP5,CCDC80
20_Summary	Reactome Gene Sets	R-HSA-113510	E2F mediated regulation of DNA replication	-16.0005	-13.736	20/34	891,983,990,993,1719,1869,4998,5111,5422,5557,5558,6241,7027,7298,8318,23594,23649,26271,81620,84515,3398,144455,1870,51053	CCNB1,CDK1,CDC6,CDC25A,DHFR,E2F1,ORC1,PCNA,POLA1,PRIM1,PRIM2,RRM2,TFDP1,TYMS,CDC45,ORC6,POLA2,FBXO5,CDT1,MCM8,ID2,E2F7,E2F2,GMNN
20_Member	Reactome Gene Sets	R-HSA-113510	E2F mediated regulation of DNA replication	-16.0005	-13.736	20/34	891,983,990,993,1719,1869,4998,5111,5422,5557,5558,6241,7027,7298,8318,23594,23649,26271,81620,84515	CCNB1,CDK1,CDC6,CDC25A,DHFR,E2F1,ORC1,PCNA,POLA1,PRIM1,PRIM2,RRM2,TFDP1,TYMS,CDC45,ORC6,POLA2,FBXO5,CDT1,MCM8
20_Member	Reactome Gene Sets	R-HSA-69205	G1/S-Specific Transcription	-13.9598	-11.795	14/18	983,990,993,1719,1869,4998,5111,5422,6241,7027,7298,8318,26271,81620	CDK1,CDC6,CDC25A,DHFR,E2F1,ORC1,PCNA,POLA1,RRM2,TFDP1,TYMS,CDC45,FBXO5,CDT1
20_Member	GO Biological Processes	GO:0000083	regulation of transcription involved in G1/S transition of mitotic cell cycle	-10.3578	-8.392	14/27	983,990,1719,1869,3398,4998,5111,5422,6241,7298,8318,26271,81620,144455	CDK1,CDC6,DHFR,E2F1,ID2,ORC1,PCNA,POLA1,RRM2,TYMS,CDC45,FBXO5,CDT1,E2F7
20_Member	Reactome Gene Sets	R-HSA-68689	CDC6 association with the ORC:origin complex	-4.87343	-3.396	43045	990,1869,1870,4998,23594,84515	CDC6,E2F1,E2F2,ORC1,ORC6,MCM8
20_Member	Reactome Gene Sets	R-HSA-69298	Association of licensing factors with the pre-replicative complex	-3.92609	-2.561	42156	990,1869,1870,4998,51053,81620	CDC6,E2F1,E2F2,ORC1,GMNN,CDT1

## Sheet: Suppl Table 3D  3dto8dUP META
GroupID	Category	Term	Description	LogP	Log(q-value)	InTerm_InList	Genes	Symbols
1_Summary	Hallmark Gene Sets	M5890	HALLMARK TNFA SIGNALING VIA NFKB	-18.6977	-14.447	36/200	467,650,1839,1906,1958,1960,2150,2669,3164,3280,3491,3575,3624,4084,4929,5142,5209,5328,5329,5791,7071,7422,8061,8870,9021,9120,9592,10769,23308,23529,23645,23764,24147,25976,56937,150094	ATF3,BMP2,HBEGF,EDN1,EGR1,EGR3,F2RL1,GEM,NR4A1,HES1,CYR61,IL7R,INHBA,MXD1,NR4A2,PDE4B,PFKFB3,PLAU,PLAUR,PTPRE,KLF10,VEGFA,FOSL1,IER3,SOCS3,SLC16A6,IER2,PLK2,ICOSLG,CLCF1,PPP1R15A,MAFF,FJX1,TIPARP,PMEPA1,SIK1
1_Member	Hallmark Gene Sets	M5890	HALLMARK TNFA SIGNALING VIA NFKB	-18.6977	-14.447	36/200	467,650,1839,1906,1958,1960,2150,2669,3164,3280,3491,3575,3624,4084,4929,5142,5209,5328,5329,5791,7071,7422,8061,8870,9021,9120,9592,10769,23308,23529,23645,23764,24147,25976,56937,150094	ATF3,BMP2,HBEGF,EDN1,EGR1,EGR3,F2RL1,GEM,NR4A1,HES1,CYR61,IL7R,INHBA,MXD1,NR4A2,PDE4B,PFKFB3,PLAU,PLAUR,PTPRE,KLF10,VEGFA,FOSL1,IER3,SOCS3,SLC16A6,IER2,PLK2,ICOSLG,CLCF1,PPP1R15A,MAFF,FJX1,TIPARP,PMEPA1,SIK1
2_Summary	GO Biological Processes	GO:0098609	cell-cell adhesion	-18.3611	-14.411	71/778	421,445,639,650,1000,1002,1004,1305,1604,1803,1948,1952,1960,3037,3280,3481,3491,3566,3575,3690,3693,3801,3815,3875,4651,4856,4860,5270,5817,6092,7042,7216,7292,7474,8641,8642,8851,8995,10272,10385,10630,11151,23308,23705,25945,27286,29126,53834,54361,55615,55824,56109,56110,56111,56114,56122,56123,56124,56125,56126,56127,56128,56129,56133,57162,57717,80380,84962,168507,199731,347902,27,1295,1969…	ARVCF,ASS1,PRDM1,BMP2,CDH2,CDH4,CDH6,COL13A1,CD55,DPP4,EFNB2,CELSR2,EGR3,HAS2,HES1,IGF2,CYR61,IL4R,IL7R,ITGB3,ITGB5,KIFC3,KIT,KRT18,MYO10,NOV,PNP,SERPINE2,PVR,ROBO2,TGFB2,TRO,TNFSF4,WNT5A,PCDHGB4,DCHS1,CDK5R1,TNFSF18,FSTL3,BTN2A2,PDPN,CORO1A,ICOSLG,CADM1,NECTIN3,SRPX2,CD274,FGFRL1,WNT4,PRR5,PAG1,PCDHGA6,PCDHGA5,PCDHGA4,PCDHGA1,PCDHB14,PCDHB13,PCDHB12,PCDHB11,PCDHB10,PCDHB9,PCDHB8,PCDHB7,PCDHB2,PE…
2_Member	GO Biological Processes	GO:0098609	cell-cell adhesion	-18.3611	-14.411	71/778	421,445,639,650,1000,1002,1004,1305,1604,1803,1948,1952,1960,3037,3280,3481,3491,3566,3575,3690,3693,3801,3815,3875,4651,4856,4860,5270,5817,6092,7042,7216,7292,7474,8641,8642,8851,8995,10272,10385,10630,11151,23308,23705,25945,27286,29126,53834,54361,55615,55824,56109,56110,56111,56114,56122,56123,56124,56125,56126,56127,56128,56129,56133,57162,57717,80380,84962,168507,199731,347902	ARVCF,ASS1,PRDM1,BMP2,CDH2,CDH4,CDH6,COL13A1,CD55,DPP4,EFNB2,CELSR2,EGR3,HAS2,HES1,IGF2,CYR61,IL4R,IL7R,ITGB3,ITGB5,KIFC3,KIT,KRT18,MYO10,NOV,PNP,SERPINE2,PVR,ROBO2,TGFB2,TRO,TNFSF4,WNT5A,PCDHGB4,DCHS1,CDK5R1,TNFSF18,FSTL3,BTN2A2,PDPN,CORO1A,ICOSLG,CADM1,NECTIN3,SRPX2,CD274,FGFRL1,WNT4,PRR5,PAG1,PCDHGA6,PCDHGA5,PCDHGA4,PCDHGA1,PCDHB14,PCDHB13,PCDHB12,PCDHB11,PCDHB10,PCDHB9,PCDHB8,PCDHB7,PCDHB2,PE…
2_Member	GO Biological Processes	GO:0030155	regulation of cell adhesion	-12.1492	-9.296	53/637	27,445,639,650,1295,1604,1803,1948,1952,1960,1969,3037,3280,3481,3491,3566,3575,3576,3673,3675,3791,3911,3987,4651,4860,5270,5328,6422,7042,7292,7422,7474,8322,8573,8995,9037,9891,10154,10272,10276,10385,10395,11151,23308,23499,25890,29126,54361,55615,55824,57162,80380,284217	ABL2,ASS1,PRDM1,BMP2,COL8A1,CD55,DPP4,EFNB2,CELSR2,EGR3,EPHA2,HAS2,HES1,IGF2,CYR61,IL4R,IL7R,CXCL8,ITGA2,ITGA3,KDR,LAMA5,LIMS1,MYO10,PNP,SERPINE2,PLAU,SFRP1,TGFB2,TNFSF4,VEGFA,WNT5A,FZD4,CASK,TNFSF18,SEMA5A,NUAK1,PLXNC1,FSTL3,NET1,BTN2A2,DLC1,CORO1A,ICOSLG,MACF1,ABI3BP,CD274,WNT4,PRR5,PAG1,PELI1,PDCD1LG2,LAMA1
2_Member	GO Biological Processes	GO:0098602	single organism cell adhesion	-10.0566	-7.487	49/637	421,445,558,639,1000,1305,1604,1803,1948,1952,1960,3037,3280,3481,3491,3566,3575,3690,3693,3801,3815,3911,3987,4651,4856,4860,5270,7042,7292,7474,8322,8851,8995,10272,10276,10385,10630,11151,23308,25945,27286,29126,53834,54361,55615,55824,57162,80380,168507	ARVCF,ASS1,AXL,PRDM1,CDH2,COL13A1,CD55,DPP4,EFNB2,CELSR2,EGR3,HAS2,HES1,IGF2,CYR61,IL4R,IL7R,ITGB3,ITGB5,KIFC3,KIT,LAMA5,LIMS1,MYO10,NOV,PNP,SERPINE2,TGFB2,TNFSF4,WNT5A,FZD4,CDK5R1,TNFSF18,FSTL3,NET1,BTN2A2,PDPN,CORO1A,ICOSLG,NECTIN3,SRPX2,CD274,FGFRL1,WNT4,PRR5,PAG1,PELI1,PDCD1LG2,PKD1L1
2_Member	GO Biological Processes	GO:0016337	single organismal cell-cell adhesion	-8.35877	-5.927	43/582	421,445,639,1000,1305,1604,1803,1948,1952,1960,3037,3280,3481,3491,3566,3575,3690,3693,3801,3815,4651,4856,4860,5270,7042,7292,7474,8851,8995,10272,10385,10630,11151,23308,25945,27286,29126,54361,55615,55824,57162,80380,168507	ARVCF,ASS1,PRDM1,CDH2,COL13A1,CD55,DPP4,EFNB2,CELSR2,EGR3,HAS2,HES1,IGF2,CYR61,IL4R,IL7R,ITGB3,ITGB5,KIFC3,KIT,MYO10,NOV,PNP,SERPINE2,TGFB2,TNFSF4,WNT5A,CDK5R1,TNFSF18,FSTL3,BTN2A2,PDPN,CORO1A,ICOSLG,NECTIN3,SRPX2,CD274,WNT4,PRR5,PAG1,PELI1,PDCD1LG2,PKD1L1
2_Member	GO Biological Processes	GO:0045785	positive regulation of cell adhesion	-7.74808	-5.437	32/377	1295,1604,1803,1948,1960,3037,3280,3481,3491,3566,3575,3673,3675,3791,3987,4651,4860,6422,7042,7292,7422,7474,8995,10272,10276,11151,23308,25890,29126,54361,55615,80380	COL8A1,CD55,DPP4,EFNB2,EGR3,HAS2,HES1,IGF2,CYR61,IL4R,IL7R,ITGA2,ITGA3,KDR,LIMS1,MYO10,PNP,SFRP1,TGFB2,TNFSF4,VEGFA,WNT5A,TNFSF18,FSTL3,NET1,CORO1A,ICOSLG,ABI3BP,CD274,WNT4,PRR5,PDCD1LG2
2_Member	GO Biological Processes	GO:0022407	regulation of cell-cell adhesion	-5.49233	-3.549	28/386	445,639,1604,1803,1948,1952,1960,3037,3280,3481,3566,3575,4651,4860,5270,7292,7474,8995,10272,10385,11151,23308,29126,54361,55615,55824,57162,80380	ASS1,PRDM1,CD55,DPP4,EFNB2,CELSR2,EGR3,HAS2,HES1,IGF2,IL4R,IL7R,MYO10,PNP,SERPINE2,TNFSF4,WNT5A,TNFSF18,FSTL3,BTN2A2,CORO1A,ICOSLG,CD274,WNT4,PRR5,PAG1,PELI1,PDCD1LG2
2_Member	GO Biological Processes	GO:0070661	leukocyte proliferation	-4.78869	-2.946	21/267	196,639,1191,1604,2150,3280,3481,3575,3815,4860,7292,8995,10385,11151,23308,23529,23705,29126,54361,57162,80380	AHR,PRDM1,CLU,CD55,F2RL1,HES1,IGF2,IL7R,KIT,PNP,TNFSF4,TNFSF18,BTN2A2,CORO1A,ICOSLG,CLCF1,CADM1,CD274,WNT4,PELI1,PDCD1LG2
2_Member	GO Biological Processes	GO:0050865	regulation of cell activation	-4.75475	-2.915	32/517	196,558,639,1490,1604,1803,1948,1960,2150,3280,3481,3566,3575,3624,4860,5155,5270,5791,6422,7292,7474,8995,9173,10385,11151,23308,23529,29126,55615,55824,57162,80380	AHR,AXL,PRDM1,CTGF,CD55,DPP4,EFNB2,EGR3,F2RL1,HES1,IGF2,IL4R,IL7R,INHBA,PNP,PDGFB,SERPINE2,PTPRE,SFRP1,TNFSF4,WNT5A,TNFSF18,IL1RL1,BTN2A2,CORO1A,ICOSLG,CLCF1,CD274,PRR5,PAG1,PELI1,PDCD1LG2
2_Member	GO Biological Processes	GO:0050867	positive regulation of cell activation	-4.36985	-2.622	23/329	558,639,1490,1604,1803,1948,1960,2150,3280,3481,3566,3575,4860,7292,7474,9173,11151,23308,23529,29126,55615,57162,80380	AXL,PRDM1,CTGF,CD55,DPP4,EFNB2,EGR3,F2RL1,HES1,IGF2,IL4R,IL7R,PNP,TNFSF4,WNT5A,IL1RL1,CORO1A,ICOSLG,CLCF1,CD274,PRR5,PELI1,PDCD1LG2
2_Member	GO Biological Processes	GO:0022409	positive regulation of cell-cell adhesion	-4.35562	-2.614	19/243	1604,1803,1948,1960,3037,3280,3481,3566,3575,4651,4860,7292,7474,10272,11151,23308,29126,55615,80380	CD55,DPP4,EFNB2,EGR3,HAS2,HES1,IGF2,IL4R,IL7R,MYO10,PNP,TNFSF4,WNT5A,FSTL3,CORO1A,ICOSLG,CD274,PRR5,PDCD1LG2
2_Member	GO Biological Processes	GO:1903037	regulation of leukocyte cell-cell adhesion	-4.24075	-2.517	22/313	445,639,1604,1803,1948,1960,3037,3280,3481,3566,3575,4860,7292,8995,10385,11151,23308,29126,55615,55824,57162,80380	ASS1,PRDM1,CD55,DPP4,EFNB2,EGR3,HAS2,HES1,IGF2,IL4R,IL7R,PNP,TNFSF4,TNFSF18,BTN2A2,CORO1A,ICOSLG,CD274,PRR5,PAG1,PELI1,PDCD1LG2
2_Member	GO Biological Processes	GO:0002694	regulation of leukocyte activation	-4.1302	-2.421	29/483	196,558,639,1604,1803,1948,1960,2150,3280,3481,3566,3575,3624,4860,5791,6422,7292,7474,8995,9173,10385,11151,23308,23529,29126,55615,55824,57162,80380	AHR,AXL,PRDM1,CD55,DPP4,EFNB2,EGR3,F2RL1,HES1,IGF2,IL4R,IL7R,INHBA,PNP,PTPRE,SFRP1,TNFSF4,WNT5A,TNFSF18,IL1RL1,BTN2A2,CORO1A,ICOSLG,CLCF1,CD274,PRR5,PAG1,PELI1,PDCD1LG2
2_Member	GO Biological Processes	GO:0002696	positive regulation of leukocyte activation	-4.09928	-2.397	22/320	558,639,1604,1803,1948,1960,2150,3280,3481,3566,3575,4860,7292,7474,9173,11151,23308,23529,29126,55615,57162,80380	AXL,PRDM1,CD55,DPP4,EFNB2,EGR3,F2RL1,HES1,IGF2,IL4R,IL7R,PNP,TNFSF4,WNT5A,IL1RL1,CORO1A,ICOSLG,CLCF1,CD274,PRR5,PELI1,PDCD1LG2
2_Member	GO Biological Processes	GO:0051250	negative regulation of lymphocyte activation	-3.9086	-2.25	12/121	558,639,3566,3624,6422,7292,8995,10385,29126,55824,57162,80380	AXL,PRDM1,IL4R,INHBA,SFRP1,TNFSF4,TNFSF18,BTN2A2,CD274,PAG1,PELI1,PDCD1LG2
2_Member	GO Biological Processes	GO:0050866	negative regulation of cell activation	-3.84144	-2.197	14/161	558,639,3566,3624,5155,5270,6422,7292,8995,10385,29126,55824,57162,80380	AXL,PRDM1,IL4R,INHBA,PDGFB,SERPINE2,SFRP1,TNFSF4,TNFSF18,BTN2A2,CD274,PAG1,PELI1,PDCD1LG2
2_Member	GO Biological Processes	GO:0007159	leukocyte cell-cell adhesion	-3.72114	-2.113	22/340	445,639,1604,1803,1948,1960,3037,3280,3481,3566,3575,4860,7292,8995,10385,11151,23308,29126,55615,55824,57162,80380	ASS1,PRDM1,CD55,DPP4,EFNB2,EGR3,HAS2,HES1,IGF2,IL4R,IL7R,PNP,TNFSF4,TNFSF18,BTN2A2,CORO1A,ICOSLG,CD274,PRR5,PAG1,PELI1,PDCD1LG2
2_Member	GO Biological Processes	GO:0050798	activated T cell proliferation	-3.68896	-2.091	16619	3481,7292,10385,23308,23705,29126,80380	IGF2,TNFSF4,BTN2A2,ICOSLG,CADM1,CD274,PDCD1LG2
2_Member	GO Biological Processes	GO:0046651	lymphocyte proliferation	-3.66335	-2.073	18/252	196,639,1604,3280,3481,3575,4860,7292,8995,10385,11151,23308,23529,23705,29126,54361,57162,80380	AHR,PRDM1,CD55,HES1,IGF2,IL7R,PNP,TNFSF4,TNFSF18,BTN2A2,CORO1A,ICOSLG,CLCF1,CADM1,CD274,WNT4,PELI1,PDCD1LG2
2_Member	GO Biological Processes	GO:0050863	regulation of T cell activation	-3.64238	-2.056	20/298	639,1604,1803,1948,1960,3280,3481,3566,3575,4860,7292,8995,10385,11151,23308,29126,55615,55824,57162,80380	PRDM1,CD55,DPP4,EFNB2,EGR3,HES1,IGF2,IL4R,IL7R,PNP,TNFSF4,TNFSF18,BTN2A2,CORO1A,ICOSLG,CD274,PRR5,PAG1,PELI1,PDCD1LG2
2_Member	GO Biological Processes	GO:0032943	mononuclear cell proliferation	-3.62124	-2.046	18/254	196,639,1604,3280,3481,3575,4860,7292,8995,10385,11151,23308,23529,23705,29126,54361,57162,80380	AHR,PRDM1,CD55,HES1,IGF2,IL7R,PNP,TNFSF4,TNFSF18,BTN2A2,CORO1A,ICOSLG,CLCF1,CADM1,CD274,WNT4,PELI1,PDCD1LG2
2_Member	GO Biological Processes	GO:0050670	regulation of lymphocyte proliferation	-3.60867	-2.04	15/190	196,639,1604,3280,3481,4860,7292,8995,10385,11151,23308,23529,29126,57162,80380	AHR,PRDM1,CD55,HES1,IGF2,PNP,TNFSF4,TNFSF18,BTN2A2,CORO1A,ICOSLG,CLCF1,CD274,PELI1,PDCD1LG2
2_Member	GO Biological Processes	GO:0032944	regulation of mononuclear cell proliferation	-3.58399	-2.021	15/191	196,639,1604,3280,3481,4860,7292,8995,10385,11151,23308,23529,29126,57162,80380	AHR,PRDM1,CD55,HES1,IGF2,PNP,TNFSF4,TNFSF18,BTN2A2,CORO1A,ICOSLG,CLCF1,CD274,PELI1,PDCD1LG2
2_Member	GO Biological Processes	GO:0042098	T cell proliferation	-3.56801	-2.009	14/171	1604,3280,3481,4860,7292,8995,10385,11151,23308,23705,29126,54361,57162,80380	CD55,HES1,IGF2,PNP,TNFSF4,TNFSF18,BTN2A2,CORO1A,ICOSLG,CADM1,CD274,WNT4,PELI1,PDCD1LG2
2_Member	GO Biological Processes	GO:0051249	regulation of lymphocyte activation	-3.55389	-1.998	25/422	196,558,639,1604,1803,1948,1960,3280,3481,3566,3575,3624,4860,6422,7292,8995,10385,11151,23308,23529,29126,55615,55824,57162,80380	AHR,AXL,PRDM1,CD55,DPP4,EFNB2,EGR3,HES1,IGF2,IL4R,IL7R,INHBA,PNP,SFRP1,TNFSF4,TNFSF18,BTN2A2,CORO1A,ICOSLG,CLCF1,CD274,PRR5,PAG1,PELI1,PDCD1LG2
2_Member	GO Biological Processes	GO:1903039	positive regulation of leukocyte cell-cell adhesion	-3.54112	-1.987	16/214	1604,1803,1948,1960,3037,3280,3481,3566,3575,4860,7292,11151,23308,29126,55615,80380	CD55,DPP4,EFNB2,EGR3,HAS2,HES1,IGF2,IL4R,IL7R,PNP,TNFSF4,CORO1A,ICOSLG,CD274,PRR5,PDCD1LG2
2_Member	GO Biological Processes	GO:0070663	regulation of leukocyte proliferation	-3.41651	-1.888	15/198	196,639,1604,3280,3481,4860,7292,8995,10385,11151,23308,23529,29126,57162,80380	AHR,PRDM1,CD55,HES1,IGF2,PNP,TNFSF4,TNFSF18,BTN2A2,CORO1A,ICOSLG,CLCF1,CD274,PELI1,PDCD1LG2
2_Member	GO Biological Processes	GO:0007162	negative regulation of cell adhesion	-3.38546	-1.865	16/221	445,650,3566,5270,7292,8322,8573,8995,9037,10154,10385,10395,29126,55824,57162,80380	ASS1,BMP2,IL4R,SERPINE2,TNFSF4,FZD4,CASK,TNFSF18,SEMA5A,PLXNC1,BTN2A2,DLC1,CD274,PAG1,PELI1,PDCD1LG2
2_Member	GO Biological Processes	GO:0051251	positive regulation of lymphocyte activation	-3.26902	-1.773	19/295	558,639,1604,1803,1948,1960,3280,3481,3566,3575,4860,7292,11151,23308,23529,29126,55615,57162,80380	AXL,PRDM1,CD55,DPP4,EFNB2,EGR3,HES1,IGF2,IL4R,IL7R,PNP,TNFSF4,CORO1A,ICOSLG,CLCF1,CD274,PRR5,PELI1,PDCD1LG2
2_Member	GO Biological Processes	GO:0050870	positive regulation of T cell activation	-3.25772	-1.765	15/205	1604,1803,1948,1960,3280,3481,3566,3575,4860,7292,11151,23308,29126,55615,80380	CD55,DPP4,EFNB2,EGR3,HES1,IGF2,IL4R,IL7R,PNP,TNFSF4,CORO1A,ICOSLG,CD274,PRR5,PDCD1LG2
2_Member	GO Biological Processes	GO:0002695	negative regulation of leukocyte activation	-3.23493	-1.746	12/143	558,639,3566,3624,6422,7292,8995,10385,29126,55824,57162,80380	AXL,PRDM1,IL4R,INHBA,SFRP1,TNFSF4,TNFSF18,BTN2A2,CD274,PAG1,PELI1,PDCD1LG2
[truncated: 281 more rows]

## Sheet: Suppl Table 3E  3dto8dDOWN META
GroupID	Category	Term	Description	LogP	Log(q-value)	InTerm_InList	Genes	Symbols
[truncated: 231 more rows]

## Sheet: Suppl Table 3F TNFANFKB genes 
Suppl Table 3F TNFANFKB genes												tpm	tpm	tpm	tpm	tpm	tpm	tpm	tpm	tpm	tpm	tpm	DeMayo	DeMayo	DeMayo
[truncated: 37 more rows]

## Sheet: Suppl Table 3G  IFNG genes
Suppl Table 3G IFNG genes												tpm	tpm	tpm	tpm	tpm	tpm	tpm	tpm	tpm	tpm	tpm	DeMayo	DeMayo	DeMayo
[truncated: 41 more rows]
